# Supplementary material
Source: publisher site journal article supplement (https://www.dovepress.com/get_supplementary_file.php?f=237361.xlsx)
Supplement: Supplementary file 1 [file get_supplementary_file.php]

## Sheet: SyStemCell
SyStemCell database not available.

## Sheet: CODEX
Cell Type	Cell Subtype	Tissue Ontology/Transcription Factors	Tissue Ontology/Histones																	Reference
Acute megakaryocitic leukemia (AML)	1 ([CL] CMK)	1 (RUNX1)	1 (H3K4me1)
Acute myeloid leukemia (AML)	11 ([PC] CD34+ acute myeloid leukemia blast cells; ) [CL] Kasumi-1 + scrambled siRNA; etc.)	21 (CBFB; CEBPA; CTDP1; EP300; ERG; FLI1; FUS; etc.)	2 (H2A.Zac; H3K9Ac)
Acute myelomonocytic leukemia (AML)	1 ([CL] ME-1)	14 (CBFB; ELF1; EP300; ERG; FLI1; GATA2; HDAC1; etc.)	1 (H3K9K14ac)
Acute promyelocytic leukemia (APML)	1 ([CL] NB4)	1 (EP300)	5 (H2A.Zac; H2AFZ/H2A.Z; H3K4me1; H3K4me3; H4K20me3)
AML FAB M4Eo and inv (16) and CBFB-MYH11	1 ([CL] ME-1)	1 (MYH11)
Angiogenic hematopoietic progenitor	1 ([PC] H1 ES derived angiogenic hematopoietic progenitor)
Anterior foregut (AGF)	4 ([PC] H7 ES derived anterior foregut (AFG); )		4 (H3K27ac; H3K27me3; H3K4me2; H3K4me3)
Anterior primitive streak (APS)	4 ([PC] H7 ES derived anterior primitive streak (APS); etc.)		4 (H3K27ac; H3K27me3; H3K4me2; H3K4me3)
B-cells	1 ([CL] Lymphoblastoid)	1 (RUNX3)
Blood	1 ([PC] CD14+CD16- classical blood monocytes)	2 (H3K27ac; H3K4me1)	2 (H3K27ac; H3K4me1)
B lymphoblast multiple myeloma cells	1 (myeloma cells [CL] MM1.S)	3 (CDK7; CDK9; POLR2A)
B lymphocytes	2 ([PC] Germinal Center B-Cells; etc.)	3 (BCL6; BCOR; SMRT)	2 (H3K27ac; H3K4me1)
B lymphocytes lymphoblastoid cells	1 ([CL] GM06990)
Breast cancer	1 ([CL] T-47D)
Burkitt lymphoma	10 ([CL] Akata; [CL] Raji; [CL] BJAB; etc.)	14 (BCL6; BCOR; SMRT; BZLF1; CIITA; CTCF; EBNA1; etc.)	5 (Ab4729; H3K27ac; H3K27me3; H3K4me1; H3K4me3)
Cervical cancer	1 ([CL] HeLa S3)	1 (ZNF143)
Chronic myeloid leukemia	1 ([CL] K-562)	1 (ZNF143)
Definitive endoderm cells	1 ([PC] H7 ES derived definitive endoderm cells)		4 (H3K27ac; H3K27me3; H3K4me2; H3K4me3)
Dendritic	1 ([PC] Monocyte derived dendritic cells)	1 (SPI1)
Diffuse large B cell lymphoma (DLBCL)	1 ([CL] OCI-Ly7)	3 (BACH2; BCL6; MAFK)
DLBCL ABC-type	1 ([CL] U2932)	1 (PRDM11)
Embryonic fibroblast	1 ([CL] dH1f)		2 (H3K27me3; H3K79me2)
Embryonic kidney cell	3 ([CL] FLP143HA; [CL] 293T-Rex; [CL] FLP76)	3 (HA, 12CA5; ZNF143; ZNF76)
Embryonic Stem Cell	6 ([CL] H1; [CL] HUES64; [CL] BGO3; etc.)	16 (CHD1; CTCF; EP300; EZH2; HDAC2; KDM4A/JMJD2A; etc.)	6 (H2A.Z; H3K27ac; H3K27me3; H3K4me2; H3K4me3; H3K79me2)
Endoderm	1 ([CL] HUES64)	1 (FOXA2)
Endometrial Stromal cell	1 ([PC] Endometrial stromal cells)	1 (NR2F2/COUP-TFII)
Endothelium	2 ( [PC] H1 ES derived endothelial cells; [PC] H1 ES derived non-hemogenic endothelial progenitors)
Endothelial colony-forming cells	1 ([PC] ECFC)	1 (TAL)
Erythroblast	6 ([PC] adult CD34+ HSPC-derived proerythroblast; [PC] Adult peripheral blood derived proerythroblast; etc.)	7 (GATA1; GFI1B; IRF2; NFE2; POLR2A; SMAD1; TAL1)	9 (H3K27ac; H3K27me3; H3K36me2; H3K36me3; H3K4me1; etc.)
Erythrocytic leukemia cells	1 ([CL] K562)	26 (BORIS; CBX2; CBX8; CHD1; CREBBP/KAT3A; CTCF; etc.)	2 (H3K27me3; H3K4me1)
Erythroid Leukemia	1 ([CL] HEL)	1 (STAT5)	1 (H3Y41ph)
Erythro-megakaryocytic progenitors	1 ([PC] H1 ES derived erythro-megakaryocytic progenitors)
Erythroid Progenitor	2 ([PC] CD36+ erythroid progenitor; [PC] fetal liver ProEs (F5))	5 (BRG1/SMARCA4; CTCF; GATA1; NFE2; TAL1)
ES cells	1 ([CL] BGO3)	1 (SMAD3)
Fibroblasts	1 ([CL] AG10803)
Haematopoietic progenitor	1 ([PC] H1 ES derived hematopoietic progenitor)
Haematopoietic stem and progenitor cells	3 ([PC] CD34+ hematopoietic stem and progenitor cells; [PC] fetal liver CD34+ HSPCs (F0), etc.)	15 (BRG1/SMARCA4; CTCF; ERG; FLI1; GATA1; GATA2; etc.)
Hemangioblast	1 ([PC] H1 ES derived hemangioblast)
Hemogenic endothelium	1 ([PC] H1 ES derived hemogenic endothelium)
Hemogenic endothelium precursor	1 ([PC] H1 ES derived hemogenic endothelium precursor)
Hodgkin Lymphoma	1 ([CL] L428-PAX5)	1 (BORIS)
Human Breast Cancer	1 ([CL] MCF-7)	2 (BORIS; CTCF)
Human Ovarian Carcinoma	1 ([CL] Ovcar8)	2 (BORIS; CTCF)
Leukemic monocyte lymphoma	1 ([CL] U937)	2 (CBFB; MYH11)
Macrophage	3 ([PC] Peripheral blood derived macrophage; [PC] Macrophage; etc.)	5 (CEBPB; EGR2; HIF1a; HIF2a; SPI1/PU.1)	3 (H2AZ; H3K27ac; H3K4me1)
Megakaryocyte	1 ([PC] CD34+ UCB derived MKs)	5 (FLI1; GATA1; GATA2; RUNX1; TAL1)
Mesenchymal stem cell	1 ([PC] H1 ES derived mesenchymal stem cell)	1 (CTCF)
Mesendoderm cell	1 ([PC] H1 ES derived mesendoderm cell)	1 (CTCF)
Midgut/hindgut	1 ([PC] H7 ES derived midgut/hindgut (MHG))		4 (H3K27Ac; H3K27me3; H3K4me2; H3K4me3)
Monocyte	1 ([PC] Peripheral blood monocyte)	1 (SPI1/PU.1)	3 (H2AZ; H3K27Ac; H3K4me1)
Mutiple myeloma	6 ([CL] Delta47; [CL] MM1.S; [CL] KMS11; etc.)	13 (BORIS; BRD2; BRD3; BRD4; CDK8; CDK9; CTCF; EZH2; etc.)	7 (H3K18Ac; H3K27Ac; H3K27me3; H3K36me2; H3K36me3; etc.)
Neuronal progenitor cell	1 ([PC] H1 ES derived neuronal progenitor cell)	1 (CTCF)
Non-hematopoietic mesoderm	1 ([PC] H1 ES derived non-hematopoietic mesoderm)
NK Cells	4 ([PC] CD56+ Natural Killer cells; etc.)		2 (H3K27Ac; H3K4me1)
Plasmacytoid Dendritic Cells	1 ([CL] CAL-1)	2 (CBFA2T3; TCF4)
Posterior foregut (PFG)	1 ([PC] H7 ES derived posterior foregut (PFG))		4 (H3K27ac; H3K27me3; H3K4me2; H3K4me3)
Primitive posterior mesoderm	1 ([PC] H1 ES derived primitive posterior mesoderm)
Pro-B acute lymphoblastic leukemia (B-ALL)	2 ([CL] RS4;11; [CL] SEM)	3 (AFF1/AF4; KMT2A/MLL; RUNX1)	2 (H3K4me3; H3K79me2)
Skin cancer	1 ([PC] RPMI-7951 malignant melanoma cell)
T-cell	6 ( [PC] CD4+CD25-CD45 RA+ naive conventional T-cells; [PC] CD8+ T-cells; etc.)		2 (H3K27Ac; H3K4me1)
T-cell acute lymphoblastic leukemia (T-ALL)	8 ([CL] Jurkat; [CL] CCRF-CEM; [CL] Jurkat E6.1; etc.)	16 (CDK7; ERG; GABPa; GATA3; LMO2; MED1/TRAP220; etc.)	1 (H3K27Ac)
T-cell Lymphoblastic Lymphoma	1 ([CL] CUTLL1)	8 (BRD4; EP300; ETS1; GABPA; MED1; NOTCH1; RBP1; etc.)	1 (H3K27Ac)
Trophoectoderm	1 ([PC] H1 ES derived trophoectoderm cells)	1 (CTCF)
Umbilical cord blood	3 ([PC] CD133+ hematopoietic stem and progenitor cells; etc.)	3 (IKZF1/IKAROS; MEIS1; SPI11/PU.1)
Umbilical vein endothelial cells	1 ([PC] Human umbilical vein endothelial cells (HUVEC))
Platform	Reference
Affymetrix HG-U133 Set (A+B)	Stemformatics
Affymetrix HG-U133_Plus_2	Stemformatics
Affymetrix HuEx-1_0-ST V2	Stemformatics
Affymetrix HuGene-1_0-ST V1	Stemformatics
Affymetrix HuGene-1_1-ST	Stemformatics
Affymetrix HuGene-2_0-ST V1	Stemformatics
Affymetrix U133AAofAV2	Stemformatics
Agilent 014850	Stemformatics
Agilent 026652 4x44K v2	Stemformatics
Agilent SurePrint G3 GE	Stemformatics
Illumina Genome Analyzer Iix RNAseq hg19 Gene TMM-RPKM	Stemformatics
Illumina HiSeq 2500	Stemformatics
Illumina HumanHT-12 V4	Stemformatics
Illumina HumanRef-8 V2	Stemformatics
Illumina HumanWG-6 V3	Stemformatics
							CD33
							CD34
							CD36
							CD38
							CD3D
							CD3E	LifeMap Discovery
							CD3G	StemFormatics, LifeMap Discovery
							CD4	StemFormatics, LifeMap Discovery
							CD40	LifeMap Discovery
							CD44	LifeMap Discovery
							CD46	StemFormatics, LifeMap Discovery
							CD47	LifeMap Discovery
							CD52	StemFormatics, LifeMap Discovery
							CD55	LifeMap Discovery
							CD58	StemFormatics, LifeMap Discovery
							CD59	StemFormatics
							CD68	LifeMap Discovery
							CD7	StemFormatics
							CD74	StemFormatics, LifeMap Discovery
							CD79A	LifeMap Discovery
							CD80	LifeMap Discovery
							CD82	StemFormatics, LifeMap Discovery
							CD86	StemFormatics, LifeMap Discovery
							CD8A	StemFormatics
							CD9	LifeMap Discovery
							CD93	LifeMap Discovery
							CDA	StemFormatics
							CDC20	LifeMap Discovery
							CDC42SE1	LifeMap Discovery
							CDC5L	StemFormatics, LifeMap Discovery
							CDCA7	StemFormatics, LifeMap Discovery
							CDCA7L	LifeMap Discovery
							CDCP1	StemFormatics, LifeMap Discovery
							CDH1	LifeMap Discovery
							CDH10	LifeMap Discovery
							CDH11	StemFormatics
							CDH13	LifeMap Discovery
							CDH18	LifeMap Discovery
							CDH2	LifeMap Discovery
							CDH3	LifeMap Discovery
							CDH5	LifeMap Discovery
							CDH6	LifeMap Discovery
							CDK1	StemFormatics
							CDK15	StemFormatics, LifeMap Discovery
							CDK2	LifeMap Discovery
							CDK7	LifeMap Discovery
							CDK8	StemFormatics, LifeMap Discovery
							CDK9	StemFormatics
							CDKN1A	LifeMap Discovery
							CDKN1c	StemFormatics
							CDKN2A	CODEX
							CDKN2B	CODEX
							CDKN3	CODEX
							CDTP1	LifeMap Discovery
							CEBPA	LifeMap Discovery
							CEBPB	StemFormatics
							CEBPD	LifeMap Discovery
							CELF2	LifeMap Discovery
							CENPF	CODEX
							CENPN	CODEX
							CEP55	CODEX, Stemformatics
							CER	StemFormatics
							CFD	LifeMap Discovery
							CFI	LifeMap Discovery
							CGNL1	LifeMap Discovery
							CH25H	LifeMap Discovery
							CHAC1	LifeMap Discovery
							CHD1	LifeMap Discovery
							CHD7	LifeMap Discovery
							CHI3L1	LifeMap Discovery
							CHP1	LifeMap Discovery
							CHP2	LifeMap Discovery
							CHRDL1	CODEX
							CHST4	LifeMap Discovery
							CHST9	StemFormatics
							CIITA	LifeMap Discovery
							CKAP4	LifeMap Discovery
							CKMT1A	LifeMap Discovery
							CKMT1B	LifeMap Discovery
							CLC	LifeMap Discovery
							CLCF1	CODEX
							CLDN1	Lifemap Discovery
							CLDN10	LifeMap Discovery
							CLDN11	LifeMap Discovery
							CLDN6	LifeMap Discovery
							CLEC4G	StemFormatics
							CLEC7A	LifeMap Discovery
							CLMN	LifeMap Discovery
							CLPP	LifeMap Discovery
							CLPSL2	LifeMap Discovery
							CMTM7	LifeMap Discovery
							CNMD	StemFormatics
							CNN1	LifeMap Discovery
							CNP	LifeMap Discovery
							CNTN1	LifeMap Discovery
							CNTNAP1	LifeMap Discovery
							CNTNAP2	LifeMap Discovery
							CNTNAP3	StemFormatics, LifeMap Discovery
							COBL	LifeMap Discovery
							COBLL1	LifeMap Discovery
							COL10A1	LifeMap Discovery
							COL11A1	LifeMap Discovery
							COL12A1	LifeMap Discovery
							COL13A1	LifeMap Discovery
							COL14A1	LifeMap Discovery
							COL19A1	StemFormatics
							COL1A1	LifeMap Discovery
							COL21A1	LifeMap Discovery
							COL2A1	LifeMap Discovery
							COL3A1	StemFormatics, LifeMap Discovery
							COL4A1	LifeMap Discovery
							COL4A2	StemFormatics, LifeMap Discovery
							COL4A5	StemFormatics
							COL5A2	StemFormatics
							COL6A1	LifeMap Discovery
							COL6A2	LifeMap Discovery
							COL6A3	LifeMap Discovery
							COL7A1	LifeMap Discovery
							COL8A1	LifeMap Discovery
							COMT	LifeMap Discovery
							COX20	LifeMap Discovery
							COX6A1	LifeMap Discovery
							CPA3	StemFormatics, LifeMap Discovery
							CPE	LifeMap Discovery
							CPO	LifeMap Discovery
							CR1	LifeMap Discovery
							CRABP1	LifeMap Discovery
							CRAMP1	StemFormatics
							CREB3	StemFormatics, LifeMap Discovery
							CREB3L1	LifeMap Discovery
							CREBBP/KAT3A	LifeMap Discovery
							CRHBP	LifeMap Discovery
							CRISPLD2	LifeMap Discovery
							CRX	LifeMap Discovery
							CRYAB	Lifemap Discovery
							CRYBG1	CODEX
							CS	stemFormatics
							CSF1	LifeMap Discovery
							CSF2RA	StemFormatics
							CSF3	StemFormatics
							CSRP1	Lifemap Discovery
							CSRP2	LifeMap Discovery
							CST1	StemFormatics
							CST13P	LifeMap Discovery
							CST2	LifeMap Discovery
							CST7	LifeMap Discovery
							CSTA	LifeMap Discovery
							CTCF	LifeMap Discovery
							CTNNB1	LifeMap Discovery
							CTNND2	LifeMap Discovery
							CTNS	LifeMap Discovery
							CTSC	StemFormatics, LifeMap Discovery
							CTSE	CODEX
							CTSG	LifeMap Discovery
							CTU2	LifeMap Discovery
							CUX2	LifeMap Discovery
							CUZD1	LifeMap Discovery
							CXADR	LifeMap Discovery
							CXCL1	LifeMap Discovery
							CXCL10	LifeMap Discovery
							CXCL12	LifeMap Discovery
							CXCL13	LifeMap Discovery
							CXCL2	LifeMap Discovery
							CXCL3	StemFormatics, LifeMap Discovery
							CXCL5	StemFormatics
							CXCL6	StemFormatics, LifeMap Discovery
							CXCL8	StemFormatics
							CXCR1	StemFormatics
							CXCR4	StemFormatics
							CXXC5	StemFormatics, LifeMap Discovery
							CYB561	StemFormatics, LifeMap Discovery
							CYLC1	StemFormatics, LifeMap Discovery
							CYP2B6	LifeMap Discovery
							CYP2B7P	LifeMap Discovery
							CYP2F1	LifeMap Discovery
							CYP2S1	LifeMap Discovery
							CYP4F30P	LifeMap Discovery
							CYR61	LifeMap Discovery
							CYTOR	LifeMap Discovery
							CYYR1	LifeMap Discovery
							D21S2088E	LifeMap Discovery
							DACT1	LifeMap Discovery
							DAP	StemFormatics
							DAPK	LifeMap Discovery
							DAZL	LifeMap Discovery
							DBH	LifeMap Discovery
							DCHS1	LifeMap Discovery
							DCLK1	LifeMap Discovery
							DCN	LifeMap Discovery
							DDAH1	LifeMap Discovery
							DDC	Lifemap Discovery
							DDC-AS1	Lifemap Discovery
							DDHD1	Lifemap Discovery
							DDX3Y	StemFormatics, LifeMap Discovery
							DENND2A	LifeMap Discovery
							DEPP1	LifeMap Discovery
							DHX38	LifeMap Discovery
							DIAPH3	LifeMap Discovery
							DIDO1	LifeMap Discovery
							DIO2	LifeMap Discovery
							DIPK2B	LifeMap Discovery
							DKK1	Lifemap Discovery
							DKK3	LifeMap Discovery
							DLC1	LifeMap Discovery
							DLGAP5	LifeMap Discovery
							DLK1	LifeMap Discovery
							DLL3	StemFormatics, LifeMap Discovery
							DLX5	StemFormatics, LifeMap Discovery
							DNAJB6	LifeMap Discovery
							DNAJC5G	LifeMap Discovery
							DNER	LifeMap Discovery
							DNMT3A	LIfeMap Discovery
							DNMT3B	LifeMap Discovery
							DOK4	LifeMap Discovery
							DPEP3	LifeMap Discovery
							DPP4	StemFormatics
							DPPA2	StemFormatics
							DPPA3	LifeMap Discovery
							DPPA4	LifeMap Discovery
							DPPA5	LifeMap Discovery
							DPYSL3	StemFormatics, LifeMap Discovery
							DRAM1	LifeMap Discovery
							DRC3	LifeMap Discovery
							DSC3	LifeMap Discovery
							DSG2	LifeMap Discovery
							DSG3	LifeMap Discovery
							DSP	LifeMap Discovery
							DUSP6	LifeMap Discovery
							DUT	LifeMap Discovery
							DVL1	StemFormatics, LifeMap Discovery
							DYDC2	LifeMap Discovery
							DYNLT3	LifeMap Discovery
							E-TABM-880	LifeMap Discovery
							E2F7	LifeMap Discovery
							EBF1	StemFormatics
							EBI3	LifeMap Discovery
							EBNA1	LifeMap Discovery
							ECE2	StemFormatics
							ECEL1P2	LifeMap Discovery
							ECSCR	StemFormatics, LifeMap Discovery
							EDIL3	LifeMap Discovery
							EDNRA	CODEX
							EDNRB	LifeMap Discovery
							EFEMP1	LifeMap Discovery
							EFNA5	LifeMap Discovery
							EFNB2	StemFormatics, LifeMap Discovery
							EGF	LifeMap Discovery
							EGFL6	LifeMap Discovery
							EGFR	LifeMap Discovery
							EGR1	StemFormatics, LifeMap Discovery
							EGR2	LIfeMap Discovery
							EIF1AY	LifeMap Discovery
							EIF5B	StemFormatics
							ELANE	LifeMap Discovery
							ELF1	StemFormatics
							ELF5	CODEX
							ELMOD1	LIfeMap Discovery
							ELOVL6	LifeMap Discovery
							EMB	StemFormatics, LifeMap Discovery
							EMCN	CODEX
							EMILIN2	StemFormatics, LifeMap Discovery
							EMP1	LifeMap Discovery
							EMP3	LifeMap Discovery
							EMX1	Lifemap Discovery
							EN1	LifeMap Discovery
							ENG	LifeMap Discovery
							ENO2	StemFormatics, LifeMap Discovery
							ENPEP	LifeMap Discovery
							ENPP2	LifeMap Discovery
							ENTPD1	LifeMap Discovery
							EP300	StemFormatics, LifeMap Discovery
							EPAS1	LifeMap Discovery
							EPB41L5	LifeMap Discovery
							EPCAM	LifeMap Discovery
							EPHA2	LifeMap Discovery
							EPHA5	CODEX
							EPHA8	LifeMap Discovery
							EPYC	LifeMap Discovery
							ERAP2	LifeMap Discovery
							ERBB2	LifeMap Discovery
							EREG	StemFormatics, LifeMap Discovery
							ERG	LifeMap Discovery
							ESM1	StemFormatics
							ESRG	LifeMap Discovery
							ESRP1	StemFormatics
							ETS1	StemFormatics
							ETS2	CODEX, LifeMap Discovery
							ETV1	LifeMap Discovery
							ETV4	LifeMap Discovery
							ETV6	LifeMap Discovery
							EVI2B	CODEX, Stemformatics
							EZH2	LifeMap Discovery
							EZR	StemFormatics, LifeMap Discovery
							F11R	LifeMap Discovery
							F2RL1	LifeMap Discovery
							F2RL2	LifeMap Discovery
							F3	CODEX, Stemformatics
							F8	LifeMap Discovery
							FA2H	LifeMap Discovery
							FABP4	LifeMap Discovery
							FAM110C	LIfeMap Discovery
							FAM124A	LifeMap Discovery
							FAM124B	LifeMap Discovery
							FAM155A	LifeMap Discovery
							FAM169A	StemFormatics
							FAM171A1	LifeMap Discovery
							FAM184A	LifeMap Discovery
							FAM189A2	LifeMap Discovery
							FAM225A	LifeMap Discovery
							FAM47C	lifeMap Discovery
							FAM71F1	StemFormatics
							FAS	LifeMap Discovery
							FAT3	LifeMap Discovery
							FAT4	LIfeMap Discovery
							FBN2	LifeMap Discovery
							FBXL21P	LifeMap Discovery
							FCER1G	LifeMap Discovery
							FCGR1A	LifeMap Discovery
							FCGR3A	LifeMap Discovery
							FCN1	StemFormatics, LifeMap Discovery
							FCRL2	LifeMap Discovery
							FEZF1	StemFormatics
							FGF13	Lifemap Discovery
							FGF18	LifeMap Discovery
							FGF2	StemFormatics
							FGF4	LifeMap Discovery
							FGF5	Lifemap Discovery
							FGF7	LifeMap Discovery
							FGF9	LifeMap Discovery
							FGFR2	StemFormatics, LifeMap Discovery
							FGFR3	LifeMap Discovery
							FGFR4	StemFormatics, LifeMap Discovery
							FHL1	StemFormatics, LifeMap Discovery
							FILIP1	LifeMap Discovery
							FILIP1L	StemFormatics, LifeMap Discovery
							FKBP10	LifeMap Discovery
							FKBP5	LifeMap Discovery
							FL1	LifeMap Discovery
							FLG	LifeMap Discovery
							FLI1	LifeMap Discovery
							FLNC	LifeMap Discovery
							FLT1	LifeMap Discovery
							FLT3	CODEX
							FMN2	LifeMap Discovery
							FMO2	CODEX, LifeMap Discovery
							FMOD	LifeMap Discovery
							FN1	StemFormatics, LifeMap Discovery
							FNDC1	StemFormatics
							FOS	LifeMap Discovery
							FOXA2	LifeMap Discovery
							FOXD3	LifeMap Discovery
							FOXF1	StemFormatics, LifeMap Discovery
							FOXH1	StemFormatics
							FOXL2	CODEX, LifeMap Discovery
							FOXM1	CODEX, LifeMap Discovery
							FOXN3	LifeMap Discovery
							FOXO1	StemFormatics, LifeMap Discovery
							FOXO3	StemFormatics
							FOXO4	LifeMap Discovery
							FOXP1	StemFormatics
							FPR2	LifeMap Discovery
							FRAS1	StemFormatics, LifeMap Discovery
							FRAT2	LifeMap Discovery
							FREM1	StemFormatics, LifeMap Discovery
							FREM2	StemFormatics
							FRY	LifeMap Discovery
							FRZB	LifeMap Discovery
							FST	LifeMap Discovery
							FSTL4	LifeMap Discovery
							FUS	LifeMap Discovery
							FUT4	LifeMap Discovery
							FZD1	StemFormatics, LifeMap Discovery
							FZD3	StemFormatics
							FZD4	LifeMap Discovery
							FZD5	CODEX
							FZD7	LifeMap Discovery
							FZD9	StemFormatics
							G3BP1	LifeMap Discovery
							GABBR2	LifeMap Discovery
							GABPa	StemFormatics, LifeMap Discovery
							GABRA1	LifeMap Discovery
							GABRA5	LifeMap Discovery
							GABRB3	lifeMap Discovery
							GABRD	LifeMap Discovery
							GABRP	CODEX
							GABRQ	LifeMap Discovery
							GADD45B	LifeMap Discovery
							GAL	LifeMap Discovery
							GALNT12	LifeMap Discovery
							GALNT14	LifeMap Discovery
							GALNT15	LifeMap Discovery
							GALNT17	StemFormatics
							GALNT3	LifeMap Discovery
							GALNTL5	LifeMap Discovery
							GALP	LifeMap Discovery
							GALR2	LifeMap Discovery
							GAP43	LifeMap Discovery
							GAS2	LifeMap Discovery
							GAS2L3	LifeMap Discovery
							GAS6	LifeMap Discovery
							GASK1A	LifeMap Discovery
							GASK1B	LifeMap Discovery
							GATA1	StemFormatics
							GATA2	LifeMap Discovery
							GATA3	StemFormatics
							GATA4	LifeMap Discovery
							GATA6	LifeMap Discovery
							GATM	CODEX, LifeMap Discovery
							GBP3	CODEX, LifeMap Discovery
							GCH1	CODEX, Stemformatics, LifeMap Discovery
							GCNT2	LifeMap Discovery
							GCNT4	StemFormatics, LifeMap Discovery
							GDA	LifeMap Discovery
							GDF3	LifeMap Discovery
							GFAP	LifeMap Discovery
							GFI1B	LifeMap Discovery
							GFPT2	LifeMap Discovery
							GFRA1	LifeMap Discovery
							GFRA2	LifeMap Discovery
							GH1	StemFormatics, LifeMap Discovery
							GH2	CODEX
							GIMAP1	LifeMap Discovery
							GIMAP2	LifeMap Discovery
							GIMAP4	LifeMap Discovery
							GIMAP6	LifeMap Discovery
							GIMAP7	LifeMap Discovery
							GIMAP8	LifeMap Discovery
							GJA1	LifeMap Discovery
							GJC1	LifeMap Discovery
							GLB1L3	LifeMap Discovery
							GLDC	lifeMap Discovery
							GLI2	LifeMap Discovery
							GLIPR1	LifeMap Discovery
							GLIPR1L1	LifeMap Discovery
							GNA14	LifeMap Discovery
							GNG11	LifeMap Discovery
							GNL3	LifeMap Discovery
							GPAM	LifeMap Discovery
							GPC3	LifeMap Discovery
							GPC4	LifeMap Discovery
							GPC6	lifeMap Discovery
							GPM6B	LifeMap Discovery
							GPR158	LifeMap Discovery
							GPR160	LIfeMap Discovery
							GPR19	LifeMap Discovery
							GPR27	LifeMap Discovery
							GPR37	LifeMap Discovery
							GPRC5B	LifeMap Discovery
							GPX8	LifeMap Discovery
							GRB14	LifeMap Discovery
							GREB1L	LifeMap Discovery
							GREM1	LifeMap Discovery
							GRN	LIfeMap Discovery
							GRPR	LifeMap Discovery
							GRTP1	LifeMap Discovery
							GSDMB	LifeMap Discovery
							H19	StemFormatics, LifeMap Discovery
							HAND1	LifeMap Discovery
							HAPLN1	lifeMap Discovery
							HAS2	LifeMap Discovery
							HAS3	LifeMap Discovery
							HBD	LifeMap Discovery
							HBEGF	LifeMap Discovery
							HBG1	StemFormatics, LifeMap Discovery
							HBQ1	LifeMap Discovery
							HCG4	LifeMap Discovery
							HCN1	StemFormatics, LifeMap Discovery
							HCP5	LifeMap Discovery
							HDAC1	StemFormatics
							HDAC2	LifeMap Discovery
							HEPH	LifeMap Discovery
							HERC5	LifeMap Discovery
							HEY2	LifeMap Discovery
							HGF	CODEX
							HGS	CODEX
							HHIP	LifeMap Discovery
							HHLA1	LifeMap Discovery
							HIF1a	LifeMap Discovery
							HIF2a	StemFormatics, LifeMap Discovery
							HIF3A	LifeMap Discovery
							HIGD1B	LifeMap Discovery
							HILPDA	LIfeMap Discovery
							HIST1H1A	CODEX, LifeMap Discovery
							HIST1H1B	CODEX
							HIST1H1E	LIfeMap Discovery
							HIST1H2AB	StemFormatics
							HIST1H2AK	LifeMap Discovery
							HIST1H2BJ	LifeMap Discovery
							HIST1H3B	LifeMap Discovery
							HIST1H3G	StemFormatics
							HLA-A	LifeMap Discovery
							HLA-B	LifeMap Discovery
							HLA-C	LifeMap Discovery
							HLA-DOA	LifeMap Discovery
							HLA-DPA1	LifeMap Discovery
							HLA-DPB2	LifeMap Discovery
							HLA-DQB1	LifeMap Discovery
							HLA-DRA	LifeMap Discovery
							HLA-DRB1	LifeMap Discovery
							HLA-G	LifeMap Discovery
							HLF	LifeMap Discovery
							HMCN1	LifeMap Discovery
							HMGN1	LifeMap Discovery
							HMMR	LifeMap Discovery
							HMX2	LifeMap Discovery
							HOOK1	StemFormatics
							HOXA1	LifeMap Discovery
							HOXA10	LifeMap Discovery
							HOXA13	LifeMap Discovery
							HOXA3	LifeMap Discovery
							HOXA4	LifeMap Discovery
							HOXA5	LIfeMap Discovery
							HOXA7	StemFormatics
							HOXA9	LifeMap Discovery
							HOXB6	LifeMap Discovery
							HOXB7	LifeMap Discovery
							HOXD10	StemFormatics
							HOXD11	LifeMap Discovery
							HPGD	StemFormatics, LifeMap Discovery
							HRH1	StemFormatics
							HS3ST5	LifeMap Discovery
							HSD17B2	StemFormatics, LifeMap Discovery
							HSD17B6	LifeMap Discovery
							HSPA2	LIfeMap Discovery
							HSPG2	LifeMap Discovery
							HUNK	LifeMap Discovery
							HY1	LifeMap Discovery
							IAH1	LifeMap Discovery
							ICAM1	LIfeMap Discovery
							ICAM2	LifeMap Discovery
							ICAM3	LifeMap Discovery
							ID1	LifeMap Discovery
							IDO1	LIfeMap Discovery
							IDS	LifeMap Discovery
							IER3	LifeMap Discovery
							IFFO2	LifeMap Discovery
							IFGFBP6	LIfeMap Discovery
							IFI44	StemFormatics
							IFITM1	LifeMap Discovery
							IFNG	LifeMap Discovery
							IFNLR1	LifeMap Discovery
							IGDCC4	LifeMap Discovery
							IGF1	LifeMap Discovery
							IGF1R	LifeMap Discovery
							IGF2BP1	LifeMap Discovery
							IGFBP1	LifeMap Discovery
							IGFBP2	LifeMap Discovery
							IGFBP3	StemFormatics, LifeMap Discovery
							IGFBP5	StemFormatics
							IGFBP5	LifeMap Discovery
							IGFBP7	StemFormatics
							IGSF21	LIfeMap Discovery
							IKBKB	LifeMap Discovery
							IL10	LifeMap Discovery
							IL11	LifeMap Discovery
							IL12A	LifeMap Discovery
							IL12B	LifeMap Discovery
							IL17A	LifeMap Discovery
							IL17RD	LifeMap Discovery
							IL18	LifeMap Discovery
							IL1A	StemFormatics
							IL1B	LifeMap Discovery
							IL1B	LifeMap Discovery
							IL1RL1	LifeMap Discovery
							IL2	StemFormatics
							IL20RA	LifeMap Discovery
							IL21R	LifeMap Discovery
							IL2RA	StemFormatics
							IL32	LifeMap Discovery
							IL4	LifeMap Discovery
							IL4R	LifeMap Discovery
							IL5	LifeMap Discovery
							IL6	StemFormatics, LifeMap Discovery
							IL6R	LifeMap Discovery
							IL6ST	LifeMap Discovery
							IL7	LifeMap Discovery
							IL9R	LifeMap Discovery
							ILK	StemFormatics, LifeMap Discovery
							INA	LifeMap Discovery
							INAVA	LifeMap Discovery
							INHBB	StemFormatics
							INHBE	LifeMap Discovery
							INMT	StemFormatics
							INSIG1	LifeMap Discovery
							INSL6	LIfeMap Discovery
							INSR	LifeMap Discovery
							INVS	LifeMap Discovery
							IQCF2	LIfeMap Discovery
							IQGAP2	LifeMap Discovery
							IRAK3	LifeMap Discovery
							IRAK4	LifeMap Discovery
							IRF2	LifeMap Discovery
							IRF3	LifeMap Discovery
							IRF4	LifeMap Discovery
							IRX2	LifeMap Discovery
							ISL1	LifeMap Discovery
							ITGA10	CODEX
							ITGA11	CODEX
							ITGA2	CODEX
							ITGA3	LifeMap Discovery
							ITGA5	LifeMap Discovery
							ITGA6	StemFormatics
							ITGA8	LifeMap Discovery
							ITGA9	StemFormatics, LifeMap Discovery
							ITGAL	LifeMap Discovery
							ITGAM	StemFormatics, LifeMap Discovery
							ITGAV	LifeMap Discovery
							ITGB1	StemFormatics
							ITGB2	LifeMap Discovery
							ITGB3	LifeMap Discovery
							ITGB4	LifeMap Discovery
							ITGB8	LifeMap Discovery
							ITIH1	StemFormatics, LifeMap Discovery
							ITLN2	LifeMap Discovery
							IVL	LifeMap Discovery
							IZKF1/IKAROS	LifeMap Discovery
							JADE2	StemFormatics
							JAG1	LifeMap Discovery
							JCAD	LifeMap Discovery
							JMJD1C	LifeMap Discovery
							JPX	CODEX
							KBTBD8	LifeMap Discovery
							KCNAB1	LifeMap Discovery
							KCND2	LifeMap Discovery
							KCNG1	CODEX
							KCNG3	LifeMap Discovery
							KCNJ13	LifeMap Discovery
							KCNK1	LifeMap Discovery
							KCNQ2	LifeMap Discovery
							KCNS3	LifeMap Discovery
							KCTD8	LifeMap Discovery
							KDM1A/LSD1	LifeMap Discovery
							KDM4A/JMJD2A	LifeMap Discovery
							KDM5B/JARID1C	LifeMap Discovery
							KDM5B/PLU1/JARID1B	LifeMap Discovery
							KDR	LifeMap Discovery
							KERA	CODEX
							KHDC3L	CODEX
							KHDRBS2	CODEX
							KIAA1211	CODEX
							KIF13A	LifeMap Discovery
							KIF15	LifeMap Discovery
							KIF1A	StemFormatics
							KIF20A	LifeMap Discovery
							KIF2C	LifeMap Discovery
							KIF5C	LifeMap Discovery
							KISS	LifeMap Discovery
							KIT	LifeMap Discovery
							KITLG	LifeMap Discovery
							KLF2	LifeMap Discovery
							KLF4	LifeMap Discovery
							KLF7	LifeMap Discovery
							KLH21	LifeMap Discovery
							KLHL20	StemFormatics
							KLK10	LifeMap Discovery
							KLK6	StemFormatics, LifeMap Discovery
							KLK7	LifeMap Discovery
							KLKB1	LifeMap Discovery
							KLRG2	LifeMap Discovery
							KMT2A/MLL	LifeMap Discovery
							KNG1	LifeMap Discovery
							KNL1	LifeMap Discovery
							KRT1	LifeMap Discovery
							KRT10	LifeMap Discovery
							KRT12	CODEX
							KRT13	LifeMap Discovery
							KRT14	LifeMap Discovery
							KRT16	LifeMap Discovery
							KRT17	LifeMap Discovery
							KRT18	LifeMap Discovery
							KRT19	LifeMap Discovery
							KRT23	LifeMap Discovery
							KRT3	LifeMap Discovery
							KRT5	LifeMap Discovery
							KRT7	LifeMap Discovery
							KRT8	LifeMap Discovery
							KRTAP1-5	LifeMap Discovery
							L1CAM	LifeMap Discovery
							L1TD1	LifeMap Discovery
							LAMA2	LifeMap Discovery
							LAMA4	LifeMap Discovery
							LAMA5	LifeMap Discovery
							LAMB1	LifeMap Discovery
							LAPTM5	LifeMap Discovery
							LAT	LifeMap Discovery
							LCK	LifeMap Discovery
							LDB2	LifeMap Discovery
							LEF1	LifeMap Discovery
							LEFTY1	LifeMap Discovery
							LEFTY2	LifeMap Discovery
							LEPR	LifeMap Discovery
							LGALS1	LifeMap Discovery
							LGALS14	StemFormatics
							LGR5	StemFormatics, LifeMap Discovery
							LHB	LifeMap Discovery
							LHFPL4	StemFormatics
							LHX9	LifeMap Discovery
							LIFR	LifeMap Discovery
							LIMCH1	LifeMap Discovery
							LIN28A	LifeMap Discovery
							LIN28B	LifeMap Discovery
							LINC00597	StemFormatics
							LINC00707	LifeMap Discovery
							LINC01013	StemFormatics, LifeMap Discovery
							LINC01116	StemFormatics, LifeMap Discovery
							LINC01197	LifeMap Discovery
							LINC01356	LifeMap Discovery
							LINC01450	LifeMap Discovery
							LINC01896	LifeMap Discovery
							LINC02510	LifeMap Discovery
							LINC02796	LifeMap Discovery
							LINGO1	LifeMap Discovery
							LIPG	LifeMap Discovery
							LIPI	LifeMap Discovery
							LMNA	LifeMap Discovery
							LMNB1	LifeMap Discovery
							LMNB2	LifeMap Discovery
							LMO2	LifeMap Discovery
							LMOD1	LifeMap Discovery
							LOC100505797	StemFormatics
							LOC151760	StemFormatics
							LOC283194	StemFormatics
							LOC283665	CODEX
							LOC284933	LifeMap Discovery
							LOC389831	LifeMap Discovery
							LOX	LifeMap Discovery
							LRAT	LifeMap Discovery
							LRATD2	LifeMap Discovery
							LRCH2	LifeMap Discovery
							LRFN2	LifeMap Discovery
							LRIG3	LifeMap Discovery
							LRP2	LifeMap Discovery
							LRP5	LifeMap Discovery
							LRP6	LifeMap Discovery
							LRP8	LifeMap Discovery
							LRRC17	LifeMap Discovery
							LRRN1	LifeMap Discovery
							LRTOMT	StemFormatics
							LSM3	StemFormatics
							LTBP2	LifeMap Discovery
							LTBP3	LifeMap Discovery
							LUM	LifeMap Discovery
							LY96	StemFormatics
							LYL1	LifeMap Discovery
							LYN	StemFormatics
							LYPD1	StemFormatics
							LYVE1	LifeMap Discovery
							LYZ	LifeMap Discovery
							MAB21L1	CODEX
							MAB21L2	LifeMap Discovery
							MACC1	LifeMap Discovery
							MAD2L1	LifeMap Discovery
							MAD2L2	LifeMap Discovery
							MAFB	LifeMap Discovery
							MAFK	StemFormatics
							MAGEA12	LifeMap Discovery
							MAGEA6	StemFormatics
							MAGOH2P	LifeMap Discovery
							MAL2	StemFormatics
							MAMDC2	CODEX
							MAML3	LifeMap Discovery
							MAMLD1	LifeMap Discovery
							MAP2	LifeMap Discovery
							MAP3K11	LifeMap Discovery
							MAP3K6	LifeMap Discovery
							MAP4K1	LifeMap Discovery
							MAP7	LifeMap Discovery
							MAPK1	LifeMap Discovery
							MAPK10	LifeMap Discovery
							MAPK3	LifeMap Discovery
							MAPK8	LifeMap Discovery
							MARCH3	LifeMap Discovery
							MARCH4	StemFormatics
							MASP1	LifeMap Discovery
							MATN2	StemFormatics
							MAX	LifeMap Discovery
							MAZ	LifeMap Discovery
							MBD2	LifeMap Discovery
							MBNL1	LifeMap Discovery
							MBOAT1	LifeMap Discovery
							MBP	StemFormatics
							MCAM	StemFormatics
							MCTP1	LifeMap Discovery
							MCUB	LifeMap Discovery
							MDK	LifeMap Discovery
							ME1	LifeMap Discovery
							MECOM	StemFormatics, LifeMap Discovery
							MECP2	LifeMap Discovery
							MED1	LifeMap Discovery
							MED1/TRAP220	StemFormatics, LifeMap Discovery
							MED21	LifeMap Discovery
							MEF2A	LifeMap Discovery
							MEF2D	LifeMap Discovery
							MEG3	CODEX
							MEGF10	CODEX
							MEIOC	CODEX
							MEIS1	LifeMap Discovery
							MEIS2	LifeMap Discovery
							MEOX2	LifeMap Discovery
							MEPE	LifeMap Discovery
							MESD	LifeMap Discovery
							MET	CODEX, Stemformatics, LifeMap Discovery
							METTL7A	LifeMap Discovery
							MFAP4	StemFormatics
							MFAP5	LifeMap Discovery
							MFGE8	LifeMap Discovery
							MFRP	StemFormatics, LifeMap Discovery
							MGARP	LifeMap Discovery
							MGAT4C	LifeMap Discovery
							MGP	LifeMap Discovery
							MIAT	LifeMap Discovery
							MICB	StemFormatics
							MID1	LifeMap Discovery
							MIF	LifeMap Discovery
							MIR10A	LifeMap Discovery
							MIR10B	LifeMap Discovery
							MIR1290	LifeMap Discovery
							MIR146A	LifeMap Discovery
							MIR148A	LifeMap Discovery
							MIR15B	LifeMap Discovery
							MIR193B	LifeMap Discovery
							MIR197	LifeMap Discovery
							MIR23A	LifeMap Discovery
							MIR23B	LifeMap Discovery
							MIR25	LifeMap Discovery
							MIR29B1	LifeMap Discovery
							MIR302A	LifeMap Discovery
							MIR302B	LifeMap Discovery
							MIR30A	LifeMap Discovery
							MIR30B	LifeMap Discovery
							MIR30E	LifeMap Discovery
							MIR320A	LifeMap Discovery
							MIR4697HG	LifeMap Discovery
							MIR503HG	LifeMap Discovery
							MIR598	LifeMap Discovery
							MIR92B	LifeMap Discovery
							MIR93	LifeMap Discovery
							MIR99B	LifeMap Discovery
							MIRLET7B	LifeMap Discovery
							MIRLET7C	LifeMap Discovery
							MIRLET7D	LifeMap Discovery
							MIRLET7E	LifeMap Discovery
							MKI67	LifeMap Discovery
							MLF2	LifeMap Discovery
							MLIP1	LifeMap Discovery
							MLLT11	LifeMap Discovery
							MME	LifeMap Discovery
							MMP1	StemFormatics, LifeMap Discovery
							MMP10	StemFormatics
							MMP11	LifeMap Discovery
							MMP12	StemFormatics
							MMP13	StemFormatics, LifeMap Discovery
							MMP24	LifeMap Discovery
							MMP3	LifeMap Discovery
							MMP9	LifeMap Discovery
							MMRN1	LifeMap Discovery
							MMRN2	StemFormatics
							MNDA	LifeMap Discovery
							MNX1	LifeMap Discovery
							MOB3B	LifeMap Discovery
							MPO	StemFormatics, LifeMap Discovery
							MPZL2	LifeMap Discovery
							MRE11	StemFormatics
							MRGPRF	LifeMap Discovery
							MSC	LifeMap Discovery
							MSH2	StemFormatics, LifeMap Discovery
							MST1	StemFormatics
							MSX2	LifeMap Discovery
							MT1A	LifeMap Discovery
							MT1F	LifeMap Discovery
							MT1G	LifeMap Discovery
							MT1X	LifeMap Discovery
							MT2A	LifeMap Discovery
							MTTP	LifeMap Discovery
							MTUS1	LifeMap Discovery
							MUC12	LifeMap Discovery
							MUC15	LifeMap Discovery
							MUC4	LifeMap Discovery
							MUSTN1	LifeMap Discovery
							MXRA5	LifeMap Discovery
							MYB	LifeMap Discovery
							MYC	LifeMap Discovery
							MYCN	StemFormatics
							MYH10	LifeMap Discovery
							MYH11	LifeMap Discovery
							MYLK	CODEX
							MYO1D	CODEX, Stemformatics
							MYO6	LifeMap Discovery
							MYOCD	LifeMap Discovery
							MYOD1	CODEX
							MYOG	LifeMap Discovery
							MYOZ2	LifeMap Discovery
							MYRF	LifeMap Discovery
							MYRIP	LifeMap Discovery
							NANOG	LifeMap Discovery
							NAP1L3	LifeMap Discovery
							NAV2	LifeMap Discovery
							NAV3	LifeMap Discovery
							NBPF14	LifeMap Discovery
							NCAM1	CODEX, Stemformatics, LifeMap Discovery
							NCF1C	StemFormatics, LifeMap Discovery
							NCOA5	LifeMap Discovery
							NCOR1	LifeMap Discovery
							NDC80	LifeMap Discovery
							NDN	LifeMap Discovery
							NDRG4	LifeMap Discovery
							NECAB1	LifeMap Discovery
							NECTIN2	CODEX
							NECTIN3	StemFormatics
							NEDD9	StemFormatics
							NEFH	StemFormatics
							NEFL	LifeMap Discovery
							NEFM	LifeMap Discovery
							NEGR1	LifeMap Discovery
							NELFA	StemFormatics
							NELL2	Lifemap Discovery
							NEO1	LifeMap Discovery
							NES	StemFormatics, LifeMap Discovery
							NFAT5	StemFormatics
							NFE2	CODEX
							NFE2L2	LifeMap Discovery
							NFE2L3	LifeMap Discovery
							NFIB	LifeMap Discovery
							NFKB2	StemFormatics
							NFKBIZ	CODEX
							NFYA	StemFormatics
							NGFR	LifeMap Discovery
							NIBAN1	StemFormatics, LifeMap Discovery
							NID2	StemFormatics, LifeMap Discovery
							NIPBL	LifeMap Discovery
							NKAIN1	LifeMap Discovery
							NKX2-5	LifeMap Discovery
							NLGN1	LifeMap Discovery
							NLRP12	LifeMap Discovery
							NLRP2	CODEX
							NME1	LifeMap Discovery
							NMRK2	LifeMap Discovery
							NMU	LifeMap Discovery
							NNAT	LifeMap Discovery
							NNMT	LifeMap Discovery
							NODAL	LifeMap Discovery
							NOS1	LifeMap Discovery
							NOS3	LifeMap Discovery
							NOTCH1	LifeMap Discovery
							NOV	LifeMap Discovery
							NOX4	LifeMap Discovery
							NPAS2	LifeMap Discovery
							NPHS2	LifeMap Discovery
							NPM1	CODEX, LifeMap Discovery
							NPPB	StemFormatics
							NPTX1	LifeMap Discovery
							NPW	LifeMap Discovery
							NPY1R	LifeMap Discovery
							NPY2R	LifeMap Discovery
							NQO1	LifeMap Discovery
							NR2F1	LifeMap Discovery
							NR2F2-AS1	LifeMap Discovery
							NR2F2/COUP-TFII	LifeMap Discovery
							NR3C1	LifeMap Discovery
							NR4A1	LifeMap Discovery
							NR4A2	LifeMap Discovery
							NR5A2	LifeMap Discovery
							NRCAM	CODEX, LifeMap Discovery
							NRF1	CODEX
							NRK	StemFormatics
							NRN1	StemFormatics, LifeMap Discovery
							NRP2	LifeMap Discovery
							NRXN3	LifeMap Discovery
							NSUN7	StemFormatics, LifeMap Discovery
							NT5E	LifeMap Discovery
							NTF3	StemFormatics
							NTF4	LifeMap Discovery
							NTN4	LifeMap Discovery
							NTRK2	LifeMap Discovery
							NTS	StemFormatics, LifeMap Discovery
							NUAK1	LifeMap Discovery
							NUAK2	LifeMap Discovery
							NUDT10	StemFormatics, LifeMap Discovery
							NUP188	LifeMap Discovery
							NUSAP1	LifeMap Discovery
							NXN	LifeMap Discovery
							OAZ3	LifeMap Discovery
							OBP2B	LifeMap Discovery
							OCIAD2	LifeMap Discovery
							OCLN	LifeMap Discovery
							OGFRL1	LifeMap Discovery
							OGN	LifeMap Discovery
							OLFM1	StemFormatics
							OLFM2	LifeMap Discovery
							OLFML3	LifeMap Discovery
							OLIG2	LifeMap Discovery
							OLR1	StemFormatics
							OR1D2	LifeMap Discovery
							OR2J2	LifeMap Discovery
							OR4D1	LifeMap Discovery
							OR52A1	StemFormatics, LifeMap Discovery
							OR9A1P	LifeMap Discovery
							OSBPL10	LifeMap Discovery
							OSM	LifeMap Discovery
							OSMR	StemFormatics
							OSR1	LifeMap Discovery
							OTX2	LifeMap Discovery
							OXCT1	LifeMap Discovery
							OXTR	LifeMap Discovery
							P3H2	LifeMap Discovery
							P4HTM	StemFormatics
							PABPC4L	LifeMap Discovery
							PAIP2B	LifeMap Discovery
							PALD1	LifeMap Discovery
							PALM	LifeMap Discovery
							PALM2	LifeMap Discovery
							PALM2-AKAP2	LifeMap Discovery
							PALMD	LifeMap Discovery
							PAMR1	StemFormatics
							PANX1	LifeMap Discovery
							PAQR5	LifeMap Discovery
							PAQR9	LifeMap Discovery
							PARD6B	LifeMap Discovery
							PARP15	LifeMap Discovery
							PARVA	StemFormatics
							PAWR	StemFormatics
							PAX3	LifeMap Discovery
							Pax5	LifeMap Discovery
							PAX6	LifeMap Discovery
							PBK	LifeMap Discovery
							PBXIP1	LifeMap Discovery
							PCDH10	StemFormatics, LifeMap Discovery
							PCDH11X	CODEX
							PCDH11Y	StemFormatics, LifeMap Discovery
							PCDH12	LifeMap Discovery
							PCDH7	LifeMap Discovery
							PCDH8	LifeMap Discovery
							PCDHB5	LifeMap Discovery
							PCED1B	LifeMap Discovery
							PCK2	LifeMap Discovery
							PCNA	Lifemap Discovery
							PCNX1	LifeMap Discovery
							PCOLCE2	LifeMap Discovery
							PCSK5	LifeMap Discovery
							PDCD4	LifeMap Discovery
							PDE4B	StemFormatics
							PDGFA	Lifemap Discovery
							PDGFD	LifeMap Discovery
							PDGFRA	LifeMap Discovery
							PDGFRB	LifeMap Discovery
							PDLIM3	LifeMap Discovery
							PDPN	LifeMap Discovery
							PDX1	StemFormatics
							PDZD4	StemFormatics
							PDZRN3	StemFormatics, LifeMap Discovery
							PECAM-1	LifeMap Discovery
							PEG10	LifeMap Discovery
							PEX5L	Lifemap Discovery
							PFKB3	LifeMap Discovery
							PGF	LifeMap Discovery
							PGFRA	StemFormatics, LifeMap Discovery
							PGR	LifeMap Discovery
							PHC1	LifeMap Discovery
							PHF21B	LifeMap Discovery
							PHF8	StemFormatics, LifeMap Discovery
							PHLDA1	StemFormatics
							PHLDA2	LifeMap Discovery
							PIEZO2	LifeMap Discovery
							PIGF	LifeMap Discovery
							PIK3CB	CODEX
							PIK3R1	LifeMap Discovery
							PIM2	LifeMap Discovery
							PIPOX	StemFormatics, LifeMap Discovery
							PITX1	LifeMap Discovery
							PITX3	StemFormatics
							PKIB	LifeMap Discovery
							PKP2	LifeMap Discovery
							PLA2G3	LifeMap Discovery
							PLA2G4C	StemFormatics, LifeMap Discovery
							PLAAT1	LifeMap Discovery
							PLAAT3	LifeMap Discovery
							PLAT	LifeMap Discovery
							PLAU	LifeMap Discovery
							PLAUR	LifeMap Discovery
							PLBD1	LifeMap Discovery
							PLCE1	LifeMap Discovery
							PLCH1	LifeMap Discovery
							PLEC	LifeMap Discovery
							PLK1	StemFormatics
							PLK2	LifeMap Discovery
							PLN	LifeMap Discovery
							PLP1	LifeMap Discovery
							PLPPR4	StemFormatics
							PLPPR5	LifeMap Discovery
							PLS1	LifeMap Discovery
							PLXNA1	LifeMap Discovery
							PM20D2	LifeMap Discovery
							PMAIP1	LifeMap Discovery
							PMAIP2	LifeMap Discovery
							PMEL	Lifemap Discovery
							PNP	StemFormatics
							PODXL	LifeMap Discovery
							POLR2A	LifeMap Discovery
							POLR3E	LifeMap Discovery
							POLR3G	LifeMap Discovery
							POU2F3	LifeMap Discovery
							POU5F1	LifeMap Discovery
							POU5F1/OCT4	CODEX
							POU5F1B	Lifemap Discovery
							POU5F1P3	Lifemap Discovery
							POU5F1P4	LifeMap Discovery
							PPARG	CODEX, StemFormatics, LifeMap Discovery
							PPARGC1B	CODEX
							PPIC	LifeMap Discovery
							PPM1E	LifeMap Discovery
							PPME1	LifeMap Discovery
							PPP1CB	StemFormatics
							PPP1R10	Lifemap Discovery
							PPP1R9A	LifeMap Discovery
							PPP2R2B	LifeMap Discovery
							PPP2R2C	LifeMap Discovery
							PPP4C	LifeMap Discovery
							PPP4R4	LifeMap Discovery
							PPPiR16B	LifeMap Discovery
							PRDM11	LifeMap Discovery
							PRDM14	LifeMap Discovery
							PREX2	StemFormatics
							PRG2	LifeMap Discovery
							PRICKLE2	LifeMap Discovery
							PRKAA2	CODEX
							PRKCB	LifeMap Discovery
							PRKCE	LifeMap Discovery
							PRKD1	StemFormatics
							PROM1	LifeMap Discovery
							PRPS2	LifeMap Discovery
							PRRX1	LifeMap Discovery
							PRSS21	StemFormatics
							PRSS23	LifeMap Discovery
							PRSS36	StemFormatics, LifeMap Discovery
							PRTG	LifeMap Discovery
							PRTN3	StemFormatics
							PRXL2A	LifeMap Discovery
							PSAT1	LifeMap Discovery
							PSG1	LifeMap Discovery
							PSG5	LifeMap Discovery
							PSPH	StemFormatics, LifeMap Discovery
							PTCH1	LifeMap Discovery
							PTCHD1	LifeMap Discovery
							PTGER3	LifeMap Discovery
							PTGER4	LifeMap Discovery
							PTGES	Lifemap Discovery
							PTGFR	LifeMap Discovery
							PTGFRN	LifeMap Discovery
							PTGIR	LifeMap Discovery
							PTGS1	LifeMap Discovery
							PTH1R	Lifemap Discovery
							PTK2	StemFormatics
							PTPN14	LifeMap Discovery
							PTPN22	LifeMap Discovery
							PTPRB	LifeMap Discovery
							PTPRC	StemFormatics
							PTPRCAP	StemFormatics
							PTPRF	LifeMap Discovery
							PTPRG	LifeMap Discovery
							PTPRS	Lifemap Discovery
							PTPRZ1	StemFormatics, LifeMap Discovery
							PTX3	LifeMap Discovery
							PUM2	LifeMap Discovery
							PWAR6	LifeMap Discovery
							PXDN	StemFormatics
							PYCARD	LifeMap Discovery
							PYGM	LifeMap Discovery
							QPCT	LifeMap Discovery
							RAB11FIP4	LifeMap Discovery
							RAB31	LifeMap Discovery
							RAB39B	StemFormatics
							RAB3B	LifeMap Discovery
							RAB7B	LifeMap Discovery
							RACGAP1	Lifemap Discovery
							RAD51	Lifemap Discovery
							RAP1A	LifeMap Discovery
							RARA	LifeMap Discovery
							RARRES2	LifeMap Discovery
							RASGEF1A	LifeMap Discovery
							RASGRF2	StemFormatics
							RASGRP1	LifeMap Discovery
							RASGRP2	CODEX, LifeMap Discovery
							RASL11B	LifeMap Discovery
							RAVER2	LifeMap Discovery
							RB1	LifeMap Discovery
							RBBP5	LifeMap Discovery
							RBFOX3	LifeMap Discovery
							RBM24	LifeMap Discovery
							RBM47	LifeMap Discovery
							RBP1	StemFormatics
							RBP4	CODEX
							RBPJ	LifeMap Discovery
							RBPMS2	LifeMap Discovery
							REN	LifeMap Discovery
							REPIN1/AP4	LifeMap Discovery
							REST	LifeMap Discovery
							RET	CODEX
							REXO1	LifeMap Discovery
							RFNLB	LifeMap Discovery
							RFX5	CODEX
							RGCC	CODEX
							RGMB	LifeMap Discovery
							RGS4	LifeMap Discovery
							RGS5	LifeMap Discovery
							RHOJ	Lifemap Discovery
							RHOU	LifeMap Discovery
							RIPOR2	LifeMap Discovery
							RIPPLY2	LifeMap Discovery
							RNASE1	LifeMap Discovery
							RNASE3	LifeMap Discovery
							RND3	LifeMap Discovery
							RNF144B	LifeMap Discovery
							RNF182	LifeMap Discovery
							RNF2	LifeMap Discovery
							RNU4-2	StemFormatics, LifeMap Discovery
							RNU5B-1	LifeMap Discovery
							RNU5D-1	LifeMap Discovery
							ROBO4	LifeMap Discovery
							ROR1	CODEX
							ROR2	LifeMap Discovery
							RPA3	LifeMap Discovery
							RPL22	Lifemap Discovery
							RPLP1	LifeMap Discovery
							RPS21	LifeMap Discovery
							RPS4Y1	StemFormatics
							RPS4Y2	StemFormatics
							RRAGD	Lifemap Discovery
							RRM2B	StemFormatics
							RRN3P2	LifeMap Discovery
							RSPO3	LifeMap Discovery
							RTN1	LifeMap Discovery
							RTP1	LifeMap Discovery
							RUNX1	LifeMap Discovery
							RUNX1/ETO	LifeMap Discovery
							RUNX1T1	LifeMap Discovery
							RUNX2	LifeMap Discovery
							RUNX3	lifeMap Discovery
							RXRAA	CODEX, StemFormatics, LifeMap Discovery
							S100A8	CODEX
							S1PR1	CODEX, StemFormatics, LifeMap Discovery
							S1PR3	StemFormatics
							SAA1	CODEX, Stemformatics
							SALL1	CODEX
							SALL2	LifeMap Discovery
							SALL3	LifeMap Discovery
							SALL4	LifeMap Discovery
							SAMD9L	StemFormatics
							SAMHD1	LifeMap Discovery
							SAP30	StemFormatics, LifeMap Discovery
							SATB1	LifeMap Discovery
							SCARA3	LifeMap Discovery
							SCARB1	LifeMap Discovery
							SCARNA1	LifeMap Discovery
							SCART1	CODEX
							SCD5	LifeMap Discovery
							SCG3	LifeMap Discovery
							SCG5	StemFormatics
							SCGB3A2	LifeMap Discovery
							SCIN	LifeMap Discovery
							SCN1B	LifeMap Discovery
							SCN9A	LifeMap Discovery
							SCNN1A	LifeMap Discovery
							SCRG1	LifeMap Discovery
							SCUBE3	StemFormatics
							SEC14L1	LifeMap Discovery
							SEL1L3	StemFormatics, LifeMap Discovery
							SELE	LifeMap Discovery
							SELENOP	LifeMap Discovery
							SEMA3A	LifeMap Discovery
							SEMA3D	LifeMap Discovery
							SEMA6A	Lifemap Discovery
							SEMA6D	LifeMap Discovery
							SEMAG1	LifeMap Discovery
							SEMG1	LifeMap Discovery
							SEPHS1	LifeMap Discovery
							Ser2P POLR2A	LifeMap Discovery
							SERPINA3	LifeMap Discovery
							SERPINB7	LifeMap Discovery
							SERPINB8	LifeMap Discovery
							SERPINB9	LifeMap Discovery
							SERPINE1	CODEX
							SERPINF1	LifeMap Discovery
							SERTAD4	LifeMap Discovery
							SFMBT2	Lifemap Discovery
							SFRP2	LifeMap Discovery
							SFRP4	LifeMap Discovery
							SFTA1P	StemFormatics
							SFTPA1	LifeMap Discovery
							SFTPC	StemFormatics
							SFXN5	StemFormatics, LifeMap Discovery
							SGIP1	StemFormatics
							SGK1	LifeMap Discovery
							SGMS2	LifeMap Discovery
							SH2B3	LifeMap Discovery
							SH3D19	LifeMap Discovery
							SH3RF2	LifeMap Discovery
							SHANK2	LifeMap Discovery
							SHC3	LifeMap Discovery
							SHE	LifeMap Discovery
							SHISA9	LifeMap Discovery
							SHMT2	LifeMap Discovery
							SIRT6	LifeMap Discovery
							SIT1	LifeMap Discovery
							SIX1	LifeMap Discovery
							SIX3	LifeMap Discovery
							SLAIN1	LifeMap Discovery
							SLC14A1	CODEX
							SLC16A10	LifeMap Discovery
							SLC1A2	LifeMap Discovery
							SLC1A3	StemFormatics
							SLC1A4	LifeMap Discovery
							SLC1A5	LifeMap Discovery
							SLC22A3	LifeMap Discovery
							SLC22A3	LifeMap Discovery
							SLC24A3	LifeMap Discovery
							SLC2A1	LifeMap Discovery
							SLC30A3	LifeMap Discovery
							SLC35F2	LifeMap Discovery
							SLC38A1	LifeMap Discovery
							SLC38A5	LifeMap Discovery
							SLC44A5	LifeMap Discovery
							SLC4A7	LifeMap Discovery
							SLC5A3	LifeMap Discovery
							SLC7A2	LifeMap Discovery
							SLC7A3	LifeMap Discovery
							SLC8A1	LifeMap Discovery
							SLCO2A1	LifeMap Discovery
							SLCO4A1	StemFormatics
							SLCO4C1	LifeMap Discovery
							SLFN12	LifeMap Discovery
							SLIT3	LifeMap Discovery
							SMAD1	LifeMap Discovery
							SMAD3	LifeMap Discovery
							SMAD6	lifeMap Discovery
							SMAD7	LifeMap Discovery
							SMARCA2	StemFormatics
							SMC1	CODEX, LifeMap Discovery
							SMC3	CODEX
							SMO	LifeMap Discovery
							SMPDL3B	StemFormatics
							SMRT	LifeMap Discovery
							SMURF2	CODEX
							SNCAIP	CODEX
							SNORA4	LifeMap Discovery
							SNORA65	LifeMap Discovery
							SNORD116-11	CODEX
							SNORD116-13	StemFormatics
							SNORD116-18	LifeMap Discovery
							SNORD116-25	LifeMap Discovery
							SNORD116-26	LifeMap Discovery
							SNORD116-27	LifeMap Discovery
							SNORD116-29	LifeMap Discovery
							SNORD116-4	LifeMap Discovery
							SNORD12C	LifeMap Discovery
							SNORD44	LifeMap Discovery
							SNORD74	LifeMap Discovery
							SNORD75	LifeMap Discovery
							SNORD78	LifeMap Discovery
							SNRPN	LifeMap Discovery
							SNTB1	LifeMap Discovery
							SNURF	LifeMap Discovery
							SNX10	LifeMap Discovery
							SNX31	LifeMap Discovery
							SOCS2	LifeMap Discovery
							SOCS3	LifeMap Discovery
							SOCS4	LifeMap Discovery
							SOD2	LifeMap Discovery
							SORBS2	LifeMap Discovery
							SORL1	StemFormatics
							SOX11	StemFormatics
							SOX17	stemFormatics
							SOX2	StemFormatics
							SOX3	LifeMap Discovery
							SOX5	LifeMap Discovery
							SOX7	StemFormatics, LifeMap Discovery
							SOX8	LifeMap Discovery
							SOX9	CODEX, StemFormatics, LifeMap Discovery
							SP100	LifeMap Discovery
							SPARC	StemFormatics
							SPI1	LifeMap Discovery
							SPI1	LifeMap Discovery
							SPI1/PU.1	StemFormatics
							SPIB	LifeMap Discovery
							SPINK5	StemFormatics, LifeMap Discovery
							SPINT2	CODEX
							SPN	CODEX, Stemformatics
							SPN	CODEX
							SPOCK1	LifeMap Discovery
							SPON1	LifeMap Discovery
							SPON2	LifeMap Discovery
							SPP1	LifeMap Discovery
							SPP1	LifeMap Discovery
							SPRR2C	LifeMap Discovery
							SPRY1	LifeMap Discovery
							SQOR	StemFormatics, LifeMap Discovery
							SRPK3	LifeMap Discovery
							SRPX	StemFormatics, LifeMap Discovery
							SSTR1	LifeMap Discovery
							ST3GAL6	StemFormatics
							ST6GALNAC5	LifeMap Discovery
							ST8SIA3	LifeMap Discovery
							ST8SIA4	LifeMap Discovery
							ST8SIA5	LifeMap Discovery
							STAB1	LifeMap Discovery
							STAC	LifeMap Discovery
							STAR	StemFormatics
							STARD6	LifeMap Discovery
							STAT1	LifeMap Discovery
							STAT2	LifeMap Discovery
							STAT3	LifeMap Discovery
							STAT5	StemFormatics
							STC1	LifeMap Discovery
							STEAP1	StemFormatics
							STMN3	LifeMap Discovery
							STOM	StemFormatics, LifeMap Discovery
							STOX2	CODEX
							STRBP	LifeMap Discovery
							STRN3	LifeMap Discovery
							STX10	LifeMap Discovery
							SULF1	LifeMap Discovery
							SULT1B1	LifeMap Discovery
							SUZ12	LifeMap Discovery
							SYLT5	LifeMap Discovery
							SYN1	LifeMap Discovery
							SYN2	StemFormatics
							SYN3	LifeMap Discovery
							SYNPO2	CODEX
							SYNPO2L	LifeMap Discovery
							SYT13	LifeMap Discovery
							SYT14	LifeMap Discovery
							SYT4	LifeMap Discovery
							SYT6	LifeMap Discovery
							SYTL2	LifeMap Discovery
							TACC2	LifeMap Discovery
							TACR1	LifeMap Discovery
							TAF8	LifeMap Discovery
							TAGLN	LifeMap Discovery
							TAL1	LifeMap Discovery
							TAL1/SCL	LifeMap Discovery
							TAP1	LifeMap Discovery
							TAS2R1	LifeMap Discovery
							TBC1D1	LifeMap Discovery
							TBP	CODEX, LifeMap Discovery
							TBX18	CODEX
							TBX20	LifeMap Discovery
							TBX22	LifeMap Discovery
							TBX3	LifeMap Discovery
							TCF12/HEB	CODEX
							TCF12/HEB	LifeMap Discovery
							TCF24	StemFormatics, LifeMap Discovery
							TCF3/E2A	LifeMap Discovery
							TCF4	StemFormatics
							TCF7L1	CODEX
							TCF7L2	CODEX
							TCIM	LifeMap Discovery
							TCTN2	CODEX
							TDGF1	CODEX, LifeMap Discovery
							TDGF1P3	LifeMap Discovery
							TDRG1	CODEX
							TEAD2	LifeMap Discovery
							TEK	LifeMap Discovery
							TENM2	LifeMap Discovery
							TENT5B	LifeMap Discovery
							TENT5C	LifeMap Discovery
							TERF1	LifeMap Discovery
							TERF2	StemFormatics, LifeMap Discovery
							TERT	LifeMap Discovery
							TESMIN	LifeMap Discovery
							TET1	LifeMap Discovery
							TEX14	LifeMap Discovery
							TFAP2A	LifeMap Discovery
							TFAP2B	StemFormatics, LifeMap Discovery
							TFPI2	LifeMap Discovery
							TFRC	LifeMap Discovery
							TGFA	LifeMap Discovery
							TGFB1	LifeMap Discovery
							TGFB2	LifeMap Discovery
							TGFB3	LifeMap Discovery
							TGM1	LifeMap Discovery
							TGM2	LifeMap Discovery
							TH	StemFormatics, LifeMap Discovery
							THBS2	StemFormatics, LifeMap Discovery
							THBS4	StemFormatics, LifeMap Discovery
							THY1	LifeMap Discovery
							TIE1	StemFormatics
							TIMELESS	Lifemap Discovery
							TIMP1	LifeMap Discovery
							TIMP2	StemFormatics
							TIMP3	StemFormatics, LifeMap Discovery
							TIMP4	LifeMap Discovery
							TJP1	StemFormatics
							TJP2	StemFormatics, LifeMap Discovery
							TLE3	StemFormatics, LifeMap Discovery
							TLR4	StemFormatics
							TM2D3	LifeMap Discovery
							TM4SF18	LifeMap Discovery
							TMC8	LifeMap Discovery
							TMEM132B	LifeMap Discovery
							TMEM185B	StemFormatics, LifeMap Discovery
							TMEM204	LifeMap Discovery
							TMEM35A	LifeMap Discovery
							TMEM47	LifeMap Discovery
							TMEM52B	LifeMap Discovery
							TMSB15A	LifeMap Discovery
							TMTC1	LifeMap Discovery
							TNC	LifeMap Discovery
							TNF	LifeMap Discovery
							TNFAIP2	LifeMap Discovery
							TNFAIP6	LifeMap Discovery
							TNFAIP8L3	LifeMap Discovery
							TNFRSF10B	StemFormatics, LifeMap Discovery
							TNFRSF10C	StemFormatics, LifeMap Discovery
							TNFRSF11B	LifeMap Discovery
							TNFRSF18	StemFormatics
							TNFRSF1B	LifeMap Discovery
							TNFRSF8	LifeMap Discovery
							TNFRSH10D	LifeMap Discovery
							TNFSF15	StemFormatics, LifeMap Discovery
							TNFSF18	LifeMap Discovery
							TNFSF4	LifeMap Discovery
							TNIK	LifeMap Discovery
							TNMD	LifeMap Discovery
							TNS3	LifeMap Discovery
							TOB1	LifeMap Discovery
							TOP2A	StemFormatics, LifeMap Discovery
							TOX	LifeMap Discovery
							TOX2	LifeMap Discovery
							TOX3	LifeMap Discovery
							TP53	LifeMap Discovery
							TP63	StemFormatics, LifeMap Discovery
							TPD52	LifeMap Discovery
							TPX2	LifeMap Discovery
							TRA2A	LifeMap Discovery
							TRAP	CODEX, LifeMap Discovery
							TRHDE	LifeMap Discovery
							TRIB3	LifeMap Discovery
							TRIM22	LifeMap Discovery
							TRIM4	LifeMap Discovery
							TRIM7	LifeMap Discovery
							TRIML2	LifeMap Discovery
							TRPC4	Lifemap Discovery
							TRPM2	LifeMap Discovery
							TSHZ3	LifeMap Discovery
							TSPAN12	LifeMap Discovery
							TSPYL5	LifeMap Discovery
							TSTD1	lifeMap Discovery
							TTC39C	StemFormatics
							TTC9	LifeMap Discovery
							TTR	LifeMap Discovery
							TUBA4A	LifeMap Discovery
							TUBB2B	LifeMap Discovery
							TUBB3	LifeMap Discovery
							TUFT1	LifeMap Discovery
							TWIST2	LifeMap Discovery
							TXNDC5	LifeMap Discovery
							TXNIP	LifeMap Discovery
							TYR1P3D12	LifeMap Discovery
							TYR1P8G5	StemFormatics
							UACA	StemFormatics
							UBE2C	LifeMap Discovery
							UBE2H	LifeMap Discovery
							UBE2L6	CODEX
							UCP2	CODEX
							UGP2	LifeMap Discovery
							UGT8	LifeMap Discovery
							UNC13A	LifeMap Discovery
							UNC5C	Lifemap Discovery
							UNC5D	LifeMap Discovery
							UPP1	LifeMap Discovery
							USHBP1	LifeMap Discovery
							USP44	LifeMap Discovery
							USP53	LifeMap Discovery
							USP9X	LifeMap Discovery
							UTF1	LifeMap Discovery
							VAMP2	LifeMap Discovery
							VAMP8	LifeMap Discovery
							VASH2	LifeMap Discovery
							VAT1L	LifeMap Discovery
							VCAM1	LifeMap Discovery
							VCAN	LifeMap Discovery
							VDR	LifeMap Discovery
							VEGFA	LifeMap Discovery
							VEGFD	LifeMap Discovery
							VGF	StemFormatics, LifeMap Discovery
							VGLL3	LifeMap Discovery
							VIM	StemFormatics
							VIPR2	StemFormatics, LifeMap Discovery
							VLDLR	LifeMap Discovery
							VPS13B	LifeMap Discovery
							VRTN	LifeMap Discovery
							VSNL1	LifeMap Discovery
							VTCN1	LifeMap Discovery
							VTRNA1-1	StemFormatics, LifeMap Discovery
							VWA3B	LifeMap Discovery
							VWDE	LifeMap Discovery
							VWF	LifeMap Discovery
							WDR72	LifeMap Discovery
							WEE1	LifeMap Discovery
							WFDC21P	lifeMap Discovery
							WHSC1	LifeMap Discovery
							WISP1	StemFormatics, LifeMap Discovery
							WNT10B	LifeMap Discovery
							WNT11	LifeMap Discovery
							WNT2	LifeMap Discovery
							WNT5A	CODEX
							WNT5B	StemFormatics
							WNT8A	StemFormatics, LifeMap Discovery
							WT1	StemFormatics
							WWTR1	LifeMap Discovery
							XCL1	StemFormatics
							XPO7	LifeMap Discovery
							XRCC2	LifeMap Discovery
							XYLT1	LifeMap Discovery
							YAP1	Lifemap Discovery
							YBX2	LifeMap Discovery
							YES1	LifeMap Discovery
							ZC3H6	StemFormatics
							ZDHHC22	StemFormatics
							ZFP42	LifeMap Discovery
							ZFPM2	LifeMap Discovery
							ZFX	LifeMap Discovery
							ZIC1	LifeMap Discovery
							ZIC2	LifeMap Discovery
							ZIC3	LifeMap Discovery
							ZIC5	LifeMap Discovery
							ZNF12	CODEX
							ZNF143	StemFormatics, LifeMap Discovery
							ZNF204P	LifeMap Discovery
							ZNF22	LifeMap Discovery
							ZNF267	LifeMap Discovery
							ZNF395	LifeMap Discovery
							ZNF483	CODEX
							ZNF681	LifeMap Discovery
							ZNF74	StemFormatics
							ZNF808	LifeMap Discovery
							ZPLD1	StemFormatics
							ZRHGAP28	LifeMap Discovery
							ZSCAN10	LifeMap Discovery
							ZSCAN12P1	LifeMap Discovery
								StemFormatics
								LifeMap Discovery
								LifeMap Discovery
								LifeMap Discovery
								LifeMap Discovery

## Sheet: ESTOOLS
ESTOOLS Data@Hand Database is no longer available.

## Sheet: SCDE
Name									File Type	Organism	Technology	Genotype	Cell Type	Date Submission
http://stemcellcommons.org/sites/default/files/xf_bioassay_files/GSM1224844_Batch4.Flavo_1uM_12h_1.CEL									Affymetrix Probe Results File	Homo sapiens	DNA microarray			N/A
http://stemcellcommons.org/sites/default/files/xf_bioassay_files/GSM1224845_Batch4.Flavo_1uM_12h_2.CEL									Affymetrix Probe Results File	Homo sapiens	DNA microarray			N/A
http://stemcellcommons.org/sites/default/files/xf_bioassay_files/GSM1224834_Batch4.Flavo_1uM_1h_1.CEL									Affymetrix Probe Results File	Homo sapiens	DNA microarray			N/A
http://stemcellcommons.org/sites/default/files/xf_bioassay_files/GSM1224827_Batch3.CDK7i_4h_250nM_2.CEL									Affymetrix Probe Results File	Homo sapiens	DNA microarray			N/A
http://stemcellcommons.org/sites/default/files/xf_bioassay_files/GSM1224825_Batch3.DMSO_4h.CEL									Affymetrix Probe Results File	Homo sapiens	DNA microarray			N/A
http://stemcellcommons.org/sites/default/files/xf_bioassay_files/GSM1224822_Batch3.DMSO_4h_forCDK7i.CEL									Affymetrix Probe Results File	Homo sapiens	DNA microarray			N/A
http://stemcellcommons.org/sites/default/files/xf_bioassay_files/GSM1224823_Batch3.Flavo_1uM_4h.CEL									Affymetrix Probe Results File	Homo sapiens	DNA microarray			N/A
http://stemcellcommons.org/sites/default/files/xf_bioassay_files/GSM1224835_Batch4.Flavo_1uM_1h_2.CEL									Affymetrix Probe Results File	Homo sapiens	DNA microarray			N/A
http://stemcellcommons.org/sites/default/files/xf_bioassay_files/GSM1224830_Batch4.Flavo_1uM_.25h_1.CEL									Affymetrix Probe Results File	Homo sapiens	DNA microarray			N/A
http://stemcellcommons.org/sites/default/files/xf_bioassay_files/GSM1224831_Batch4.Flavo_1uM_.25h_2.CEL									Affymetrix Probe Results File	Homo sapiens	DNA microarray			N/A
http://stemcellcommons.org/sites/default/files/xf_bioassay_files/GSM1224836_Batch4.Flavo_1uM_2h_1.CEL									Affymetrix Probe Results File	Homo sapiens	DNA microarray			N/A
http://stemcellcommons.org/sites/default/files/xf_bioassay_files/GSM1224833_Batch4.Flavo_1uM_.5h_2.CEL									Affymetrix Probe Results File	Homo sapiens	DNA microarray			N/A
http://stemcellcommons.org/sites/default/files/xf_bioassay_files/GSM1224840_Batch4.Flavo_1uM_6h_1.CEL									Affymetrix Probe Results File	Homo sapiens	DNA microarray			N/A
http://stemcellcommons.org/sites/default/files/xf_bioassay_files/GSM1224841_Batch4.Flavo_1uM_6h_2.CEL									Affymetrix Probe Results File	Homo sapiens	DNA microarray			N/A
http://stemcellcommons.org/sites/default/files/xf_bioassay_files/GSM1224842_Batch4.Flavo_1uM_8h_1.CEL									Affymetrix Probe Results File	Homo sapiens	DNA microarray			N/A
http://stemcellcommons.org/sites/default/files/xf_bioassay_files/GSM1224837_Batch4.Flavo_1uM_2h_2.CEL									Affymetrix Probe Results File	Homo sapiens	DNA microarray			N/A
http://stemcellcommons.org/sites/default/files/xf_bioassay_files/GSM1224838_Batch4.Flavo_1uM_4h_1.CEL									Affymetrix Probe Results File	Homo sapiens	DNA microarray			N/A
http://stemcellcommons.org/sites/default/files/xf_bioassay_files/GSM1224839_Batch4.Flavo_1uM_4h_2.CEL									Affymetrix Probe Results File	Homo sapiens	DNA microarray			N/A
http://stemcellcommons.org/sites/default/files/xf_bioassay_files/GSM1224832_Batch4.Flavo_1uM_.5h_1.CEL									Affymetrix Probe Results File	Homo sapiens	DNA microarray			N/A
http://stemcellcommons.org/sites/default/files/xf_bioassay_files/GSM1224818_Batch2.DMSO_4h_1.CEL									Affymetrix Probe Results File	Homo sapiens	DNA microarray			N/A
http://stemcellcommons.org/sites/default/files/xf_bioassay_files/GSM1224819_Batch2.DMSO_4h_2.CEL									Affymetrix Probe Results File	Homo sapiens	DNA microarray			N/A
ftp://ftp.sra.ebi.ac.uk/vol1/fastq/SRR535/SRR535811/SRR535811.fastq.gz									FASTQ.GZ file	Homo sapiens	nucleotide sequencing			N/A
ftp://ftp.sra.ebi.ac.uk/vol1/fastq/SRR494/SRR494106/SRR494106.fastq.gz									FASTQ.GZ file	Mus musculus	nucleotide sequencing		Neuronal stem cell	N/A
ftp://ftp.sra.ebi.ac.uk/vol1/fastq/SRR494/SRR494104/SRR494104.fastq.gz									FASTQ.GZ file	Mus musculus	nucleotide sequencing		Neuronal stem cell	N/A
ftp://ftp.sra.ebi.ac.uk/vol1/fastq/SRR535/SRR535806/SRR535806.fastq.gz									FASTQ.GZ file	Homo sapiens	nucleotide sequencing			N/A
ftp://ftp.sra.ebi.ac.uk/vol1/fastq/SRR535/SRR535807/SRR535807.fastq.gz									FASTQ.GZ file	Homo sapiens	nucleotide sequencing			N/A
ftp://ftp.sra.ebi.ac.uk/vol1/fastq/SRR535/SRR535808/SRR535808.fastq.gz									FASTQ.GZ file	Homo sapiens	nucleotide sequencing			N/A
ftp://ftp.sra.ebi.ac.uk/vol1/fastq/SRR535/SRR535809/SRR535809.fastq.gz									FASTQ.GZ file	Homo sapiens	nucleotide sequencing			N/A
ftp://ftp.sra.ebi.ac.uk/vol1/fastq/SRR443/SRR443851/SRR443851.fastq.gz									FASTQ.GZ file	Homo sapiens	nucleotide sequencing		Jurkat E6-1	N/A
ftp://ftp.sra.ebi.ac.uk/vol1/fastq/SRR443/SRR443856/SRR443856.fastq.gz									FASTQ.GZ file	Homo sapiens	nucleotide sequencing		Jurkat E6-1	N/A
ftp://ftp.sra.ebi.ac.uk/vol1/fastq/SRR443/SRR443855/SRR443855.fastq.gz									FASTQ.GZ file	Homo sapiens	nucleotide sequencing		Jurkat E6-1	N/A
ftp://ftp.sra.ebi.ac.uk/vol1/fastq/SRR443/SRR443853/SRR443853.fastq.gz									FASTQ.GZ file	Homo sapiens	nucleotide sequencing		Jurkat E6-1	N/A
ftp://ftp.sra.ebi.ac.uk/vol1/fastq/SRR443/SRR443852/SRR443852.fastq.gz									FASTQ.GZ file	Homo sapiens	nucleotide sequencing		Jurkat E6-1	N/A
ftp://ftp.sra.ebi.ac.uk/vol1/fastq/SRR443/SRR443854/SRR443854.fastq.gz									FASTQ.GZ file	Homo sapiens	nucleotide sequencing		Jurkat E6-1	N/A
ftp://ftp.sra.ebi.ac.uk/vol1/fastq/SRR443/SRR443847/SRR443847.fastq.gz									FASTQ.GZ file	Homo sapiens	nucleotide sequencing		Jurkat E6-1	N/A
ftp://ftp.sra.ebi.ac.uk/vol1/fastq/SRR443/SRR443848/SRR443848.fastq.gz									FASTQ.GZ file	Homo sapiens	nucleotide sequencing		Jurkat E6-1	N/A
ftp://ftp.sra.ebi.ac.uk/vol1/fastq/SRR443/SRR443849/SRR443849.fastq.gz									FASTQ.GZ file	Homo sapiens	nucleotide sequencing		Jurkat E6-1	N/A
ftp://ftp.sra.ebi.ac.uk/vol1/fastq/SRR443/SRR443850/SRR443850.fastq.gz									FASTQ.GZ file	Homo sapiens	nucleotide sequencing		Jurkat E6-1	N/A
ftp://ftp.sra.ebi.ac.uk/vol1/fastq/SRR408/SRR408152/SRR408152.fastq.gz									FASTQ.GZ file	Homo sapiens	nucleotide sequencing		dH1f	N/A
ftp://ftp.sra.ebi.ac.uk/vol1/fastq/SRR408/SRR408155/SRR408155.fastq.gz									FASTQ.GZ file	Homo sapiens	nucleotide sequencing		dH1f	N/A
ftp://ftp.sra.ebi.ac.uk/vol1/fastq/SRR408/SRR408150/SRR408150.fastq.gz									FASTQ.GZ file	Homo sapiens	nucleotide sequencing		dH1f	N/A
ftp://ftp.sra.ebi.ac.uk/vol1/fastq/SRR408/SRR408154/SRR408154.fastq.gz									FASTQ.GZ file	Homo sapiens	nucleotide sequencing		dH1f	N/A
rlog_counts.csv.gz									Gzip compressed archive	Mus musculus	nucleotide sequencing		Gene Knockout + Wild Type	N/A
rawcounts.csv.gz									Gzip compressed archive	Mus musculus	nucleotide sequencing		Gene Knockout + Wild Type	N/A
QC.html									Hypertext Markup Language	Mus musculus	nucleotide sequencing		Gene Knockout + Wild Type	N/A
normalized_counts.csv.gz									Gzip compressed archive	Mus musculus	nucleotide sequencing		Gene Knockout + Wild Type	N/A
gprofiler.results.csv.gz									Gzip compressed archive	Mus musculus	nucleotide sequencing		Gene Knockout + Wild Type	N/A
Functional_enrichment.html									Hypertext Markup Language	Mus musculus	nucleotide sequencing		Gene Knockout + Wild Type	N/A
http://ftp.sra.ebi.ac.uk/vol1/fastq/SRR449/SRR449374/SRR449374.fastq.gz									FASTQ.GZ file	Mus musculus	nucleotide sequencing		WT (control)	N/A
http://ftp.sra.ebi.ac.uk/vol1/fastq/SRR449/SRR449373/SRR449373.fastq.gz									FASTQ.GZ file	Mus musculus	nucleotide sequencing		BirA	N/A
ftp://ftp.sra.ebi.ac.uk/vol1/fastq/SRR449/SRR449372/SRR449372.fastq.gz									FASTQ.GZ file	Mus musculus	nucleotide sequencing		BirA and FLAG-Biotin-tagged BCL11A	N/A
http://ftp.sra.ebi.ac.uk/vol1/fastq/SRR064/SRR064945/SRR064945.fastq.gz									FASTQ.GZ file	Homo sapiens	nucleotide sequencing			N/A
http://ftp.sra.ebi.ac.uk/vol1/fastq/SRR064/SRR064944/SRR064944.fastq.gz									FASTQ.GZ file	Homo sapiens	nucleotide sequencing			N/A
http://ftp.sra.ebi.ac.uk/vol1/fastq/SRR064/SRR064953/SRR064953.fastq.gz									FASTQ.GZ file	Homo sapiens	nucleotide sequencing			N/A
http://ftp.sra.ebi.ac.uk/vol1/fastq/SRR343/SRR343324/SRR343324.fastq.gz									FASTQ.GZ file	Homo sapiens	nucleotide sequencing		K562 overexpressing C/EBPα-ER	N/A
http://ftp.sra.ebi.ac.uk/vol1/fastq/SRR343/SRR343329/SRR343329.fastq.gz									FASTQ.GZ file	Homo sapiens	nucleotide sequencing			N/A
http://ftp.sra.ebi.ac.uk/vol1/fastq/SRR351/SRR351414/SRR351414.fastq.gz									FASTQ.GZ file	Homo sapiens	nucleotide sequencing		Proerythroblast	N/A
http://ftp.sra.ebi.ac.uk/vol1/fastq/SRR343/SRR343291/SRR343291.fastq.gz									FASTQ.GZ file	Homo sapiens	nucleotide sequencing		Hematopoietic stem cell (HSC)	N/A
http://ftp.sra.ebi.ac.uk/vol1/fastq/SRR343/SRR343292/SRR343292.fastq.gz									FASTQ.GZ file	Homo sapiens	nucleotide sequencing		Hematopoietic stem cell (HSC)	N/A
http://ftp.sra.ebi.ac.uk/vol1/fastq/SRR343/SRR343293/SRR343293.fastq.gz									FASTQ.GZ file	Homo sapiens	nucleotide sequencing		Hematopoietic stem cell (HSC)	N/A
http://ftp.sra.ebi.ac.uk/vol1/fastq/SRR343/SRR343294/SRR343294.fastq.gz									FASTQ.GZ file	Homo sapiens	nucleotide sequencing		Hematopoietic stem cell (HSC)	N/A
http://ftp.sra.ebi.ac.uk/vol1/fastq/SRR343/SRR343295/SRR343295.fastq.gz									FASTQ.GZ file	Homo sapiens	nucleotide sequencing		Proerythroblast	N/A
http://ftp.sra.ebi.ac.uk/vol1/fastq/SRR343/SRR343296/SRR343296.fastq.gz									FASTQ.GZ file	Homo sapiens	nucleotide sequencing		Proerythroblast	N/A
3140 .cvs files are included in the database.

## Sheet: Stemformatics
	Name	Description	Total Samples	Sample Types	Platform	Project	Species	External links
	Abud	Microglia play critical roles in brain development, homeostasis, and neurological disorders. Here, w ...	43	iPSC, iPSC-derived HPC, iPSC-derived MGL, iPSC-derived MGL + neuron, i ...	RNASeq (Illumina)		Homo sapiens	Geo
	Affer	In comparing gene expression of normal and CML CD34+ quiescent (G0) cell, 292 genes were downregulat ...	24	HSC G0, AP-CML G0, CP-CML G0, HSC cycling, AP-CML cycling, CP-CML cycling	Microarray (Affymetrix)	leukomics	Homo sapiens	Geo
	Agerstam	The 8p11 myeloproliferative syndrome (EMS), also referred to as stem cell leukemia/lymphoma, is a ch ...	12	CB CD34+ control, CB CD34+ BCR/FGFR1, CB CD34+ BCR/ABL1, CB CD34+ ZMYM2/FGFR1	Microarray (Affymetrix)	leukomics	Homo sapiens	ArrayExpress, Geo
	Aghajanova	The cellular sources that contribute to the renewal of human endometrium are largely unknown. It has ...	8	MSC, vehicle, 8-Br-cAMP	Microarray (Affymetrix)		Homo sapiens	ArrayExpress, Geo
	Aikawa	Spinocerebellar ataxia type 6 (SCA6) is dominantly inherited neurodegenerative disease, caused by an ...	12	WT MPI 11Q/11Q KI cerebellum, MPI 11Q/11Q KI cerebellum, WT MPI 118Q/118Q KI cerebellum, MPI 118Q/118Q KI cerebellum	Microarray (Affymetrix)		Mus musculus	Geo
	Alemdehy	MicroRNAs (miRNAs) have the potential to regulate cellular differentiation programs; however, miRNA ...	9	Dicer null granulocyte-macrophage progenitors, Dicer het granulocyte-macrophage progenitors, Dicer wt granulocyte-macrophage progenitors	Microarray (Affymetrix)		Mus musculus	ArrayExpress, Geo
	Alikhan	Colony-stimulating factor (CSF)-1 controls the survival, proliferation, and differentiation of macro ...	24	5 days post surgery Vehicle, 5 days post surgery CSF, 7 days post surgery Vehicle, 7 days post surgery CSF	Microarray (Illumina)		Mus musculus	ArrayExpress
	Alves	Human aging is associated with loss of function and regenerative capacity. Human bone marrow derived ...	61	MSC young male, MSC old male, MSC old female, MSC Pelvis young male, M ...	Microarray (Affymetrix)		Homo sapiens	Geo
	An	We recently developed fluorescence-activated cell sorting (FACS)-based methods to purify morphologic ...	15	proerythroblast, early basophilic erythroblast, late basophilic erythroblast, polychromatic erythroblast, orthochromatic erythroblast	RNASeq (Illumina)		Homo sapiens	Geo
	An	We recently developed fluorescence-activated cell sorting (FACS)-based methods to purify morphologic ...	12	proerythroblast, basophilic erythroblast, polychromatic erythroblast, orthochromatic erythroblast	RNASeq (Illumina)		Mus musculus	Geo
	Anandasabapathy	Antigen-presenting cells in the disease-free brain have been identified primarily by expression of a ...	14	CD11bhi CD115+ monocyte, CD45intCD11c- microglia, CD45hiCD11c+brain DC, CD11c+CD8- splenic DC, CD11c+CD8+ splenic DC	Microarray (Affymetrix)		Mus musculus	Geo
	Ancuta	Human peripheral blood monocytes (Mo) consist of subsets distinguished by expression of CD16 (FCGRII ...	7	CD14+ CD16- monocyte, CD14+CD16+ monocyte	Microarray (Affymetrix)		Homo sapiens	Geo
	Andersen	Introduction: There is a clinical need for developing systemic transplantation protocols for use of ...	16	HBF clone AD10, HBF clone BB10, HBF clone DD8, HBF clone T4P38, LBF clone CB4, LBF clone CB8, LBF clone CF1, LBF clone T4	Microarray (Illumina)		Homo sapiens	Geo
	Andrade	Cockayne syndrome (CS) is a human premature aging disorder associated with neurological and developm ...	24	CSB fibroblast, CSB-iPSC clone 1, CSB-iPSC clone 2, CSB-iPSC clone 3, iPSC WT-clone 1, iPSC WT-clone 2, H1 ESC, HUES6 ESC	Microarray (Affymetrix)		Homo sapiens	ArrayExpress, Geo
	André	BACKGROUND: In multiple myeloma, bone marrow mesenchymal stromal cells support myeloma cell growth. ...	7	MSC, MSC multiple myeloma	Microarray (Affymetrix)		Homo sapiens	Geo
	Ang	Mutation of highly conserved residues in transcription factors may affect protein-protein or protein ...	17	iPSC, CP GATA+/+, CP GATA_G296S, CM GATA+/+, CM GATA_G296S	RNASeq (Illumina)		Homo sapiens	Geo
	Arumugam	Mincle is a C-type lectin known to play a role in innate immune responses to sterile inflammation, b ...	16	WT microglia sham treatment, Clec4e-/- microglia sham treatment, WT microglia I/R, Clec4e-/- microglia I/R	Microarray (Affymetrix)		Mus musculus	Geo
	Asselin-Labat	The ovarian hormones oestrogen and progesterone profoundly influence breast cancer risk, underpinnin ...	14	MaSC enriched (CD29 hi CD24+), luminal (CD29 lo CD24+)	Microarray (Illumina)		Mus musculus	ArrayExpress, Geo
	Avery	Human embryonic stem cells (hESCs) replicate in vitro by the process of self-renewal, whilst maintai ...	7	ESC on MEF, ESC on MEF+ S-1-P media, ESC on Matrigel	Microarray (Affymetrix)		Homo sapiens	ArrayExpress, Geo
	Balakumaran	Dyskeratosis congenita (DC) is an inherited multisystem disorder, characterized by oral leukoplakia, ...	9	MSC, siNC-BMSC, siTERC-BMSC	Microarray (Affymetrix)		Homo sapiens	ArrayExpress, Geo
	Balan	Human monocyte-derived dendritic cell (MoDC) have been used in the clinic with moderately encouragin ...	74	pDC, CD141- XCR1- DC, CD141+ XCR1- DC, CD1c+, CD1c+ LPS 16h, CD1c+ R84 ...	Microarray (Affymetrix)		Homo sapiens	ArrayExpress, Geo
	Baldwin	The inflammatory response is normally limited by mechanisms regulating its resolution. In the absenc ...	30	D6KO_untreated skin, D6KO_irritant_Day1, D6KO_irritant_Day2, D6KO_irri ...	Microarray (Affymetrix)		Mus musculus	Geo
	Balgobind	BACKGROUND: Pediatric acute myeloid leukemia is a heterogeneous disease characterized by non-random ...	191	MLL-rearrangement, FLT3-ITD, CEBPA mutation, N/K-RAS mutation, NPM1 mu ...	Microarray (Affymetrix)		Homo sapiens	Geo
	Banchereau	The mechanisms by which microbial vaccines interact with human APCs remain elusive. Herein, we descr ...	88	CD141+ DC, CD141+ FZ, CD141+ PVX, CD1c+ DC, CD1c+ FZ, CD1c+ Gardasil, ...	Microarray (Illumina)		Homo sapiens	Geo
	Basford	AIMS/HYPOTHESIS: Using a novel directed differentiation protocol, we recently generated up to 25% in ...	9	islets, ESC-derived INS-GFP+, ESC-derived INS-GFP-	Microarray (Affymetrix)		Homo sapiens	ArrayExpress, Geo
	Beerman	Hematopoietic stem cells (HSCs) maintain homeostasis and regenerate the blood system throughout life ...	71	HSC sorted for Lin-c-Kit+Sca1+CD34−Flk2−, HSC 3 hr mixed expansion cul ...	Microarray (Affymetrix)		Mus musculus	Geo
	Behren	We established a range of melanoma cell lines from patient material (Table 1) termed Ludwig‐Melbourn ...	55	melanoma cell line-100, melanoma cell line-101, melanoma cell line-12, ...	Microarray (Illumina)		Homo sapiens	ArrayExpress
	Beins	Microglia, the immune cells of the CNS, are highly adaptive cells that can acquire different pro- an ...	15	mES-derived microglia, mES-derived microglia +IL4, mES-derived microglia +TGF, mES-derived microglia +IFNg/LPS	Microarray (Illumina)		Mus musculus	Geo
	Beins	Microglia, the immune cells of the CNS, are highly adaptive cells that can acquire different pro- an ...	11	glial/microglial mixed culture, glial/microglia mixed culture + IL4, glial/microglia mixed culture + TGF, glial/microglia mixed culture + IFNg/LPS	Microarray (Illumina)		Mus musculus	Geo
	Beliakova-Bethell	Multiple scientific disciplines require the isolation of specific subsets of blood cells from patien ...	50	neg-select B-cell, CD19+ B-cell, FACS selected B-cell, neg-select CD4 ...	Microarray (Illumina)	leukomics	Homo sapiens	Geo
	Benevento	The ectopic expression of Oct4, Klf4, c-Myc and Sox2 (OKMS) transcription factors allows reprogrammi ...	13	2°MEF, D2H, D5H, D8H, D11H, D16H, D18H, D16L, D21L, D21Ø, 2⁰iPSC, ESC, 1⁰iPSC	Proteomics (Agilent)	grandiose	Mus musculus	PXD
	Benisch	Primary osteoporosis is an age-related disease characterized by an imbalance in bone homeostasis. Wh ...	18	BM-MSC, elderly BM-MSC, osteoporotic BM-MSC, senscent	Microarray (Affymetrix)		Homo sapiens	Geo
	Berdasco	Adult stem cells have an enormous potential for clinical use in regenerative medicine that avoids ma ...	7	MSC, MSC-derived myocyte, MSC-derived osteocyte	Microarray (Affymetrix)		Homo sapiens	Geo
	Beutner	Microglial cells can be derived directly from the dissociated brain tissue by sorting procedures, fr ...	27	astrocyte, neuron, microglia, ESC-derived MG, BM-derived macrophage, BM-DC, CD8+ T-cell	Microarray (Illumina)		Mus musculus	Geo
	Bigas	Understanding how hematopoietic stem cells (HSCs) are generated and the signals that control this pr ...	6	endothelial-like cell cKit(-)CD31(+)CD45(-), endothelial-like cell cKit(+)CD31(+)CD45(-)	Microarray (Affymetrix)		Mus musculus	ArrayExpress, Geo
	Blakeley	Here, we provide fundamental insights into early human development by single-cell RNA-sequencing of ...	30	trophectoderm, epiblast, primitive endoderm	Single Cell RNASeq (Illumina)		Homo sapiens	Geo
	Bock	The developmental potential of human pluripotent stem cells suggests that they can produce disease-r ...	43	ESC, iPSC, fibroblast, ESC - derived EB	Microarray (Affymetrix)		Homo sapiens	ArrayExpress, Geo
	Bonfanti	Mesoangioblasts are vessel-associated progenitor cells that show therapeutic promise for the treatme ...	4	Control, PW1-siRNA	Microarray (Affymetrix)		Mus musculus	Geo
	Bozyk	We have previously isolated mesenchymal stromal cells (MSCs) from the tracheal aspirates of prematur ...	9	CB MSC, lung MSC, lung fibroblast	Microarray (Illumina)		Homo sapiens	ArrayExpress, Geo
	Brennand	The authors used lentiviral methods to directly reprogram fibroblasts from normal and schizophrenic ...	24	iPSC-derived neuron, iPSC-derived neuron SZ	Microarray (Affymetrix)		Homo sapiens	ArrayExpress, Geo
	Briggs	Down syndrome (DS) is the most frequent cause of human congenital mental retardation. Cognitive defi ...	51	Fib, DS-fibroblast, iPSC, euploid iPSC, DS-iPSC, ESC	Microarray (Illumina)		Homo sapiens	Geo
	Brownjohn	The derivation of microglia from human stem cells provides systems for understanding microglial biol ...	11	iMac, iMicroglia	RNASeq (Illumina)		Homo sapiens	Geo
	Bruennert	The selective bcr-abl tyrosine kinase inhibitor imatinib has become the therapy of choice for patien ...	12	CML untreated, CML 7 days imatinib	Microarray (Affymetrix)	leukomics	Homo sapiens	ArrayExpress, Geo
	Brunskill	We present a gene expression atlas of early mouse craniofacial development. Laser capture microdisse ...	103	E8.5 caudal neural epithelium, E8.5 floor plate neural epithelium, E8. ...	Microarray (Affymetrix)		Mus musculus	Geo
	Bruttger	During early embryogenesis, microglia arise from yolk sac progenitors that populate the developing c ...	8	BM macrophage, WT microglia, repopulating microglia	RNASeq (Illumina)		Mus musculus	Geo
	Butcher	Tolerance is a long-recognized property of macrophages that leads to an altered response to repeated ...	25	Untreated, LPS Acute, LPS Tolerance, CpG Acute, CpG Tolerance, Pam3csk4 Acute, Pam3csk4 Tolerance, PolyIC Acute, PolyIC Tolerance	Microarray (Agilent)		Mus musculus	Geo
	Butovsky	Microglia are myeloid cells of the CNS that participate both in normal CNS function and in disease. ...	6	CNS derived microglia, Splenic Ly6C positive monocytes	Microarray (Affymetrix)		Mus musculus	Geo
	Cabezas-Wallscheid	Dormant hematopoietic stem cells (dHSCs) are atop the hematopoietic hierarchy. The molecular identit ...	16	HSC, HSC+ATRA, HSC+polyI:C, HSC+ATRA+polyI:C, HSC+DMSO, HSC+ATRA culture	Microarray (Affymetrix)		Mus musculus	Geo
	Cabezas-Wallscheid	Dormant hematopoietic stem cells (dHSCs) are atop the hematopoietic hierarchy. The molecular identit ...	9	LRC, aHSC, MPP	RNASeq (Illumina)		Mus musculus	ArrayExpress
	Carcamo-Orive	Variability in induced pluripotent stem cell (iPSC) lines remains a concern for disease modeling and ...	317	male, female, male IS, female IS, male IR, female IR	RNASeq (Illumina)		Homo sapiens	Geo
	Casero	To elucidate the transcriptional 'landscape' that regulates human lymphoid commitment during postnat ...	20	HSC, LMPP, CLP, BCP, thymic MLP, thymic MLP 2, thymic T-cell progenitor, Thymic CD4+CD8+ T-cell, Thymic CD4+ T-cell, Thymic CD8+ T-cell	RNASeq (Illumina)		Homo sapiens	Geo
	Castiglioni	Fluorescence-activated cell sorting (FACS) strategies to purify distinct cell types from the pool of ...	10	unsorted pool, Pax7+ multipotent progenitor cell, CD34+ myofiber-associated stromal cells	Microarray (Affymetrix)		Homo sapiens	Geo
	Ceroi	Blastic plasmacytoid dendritic cell (PDC) neoplasm (BPDCN) is an aggressive hematological malignancy ...	112	AML0, AML1, AML2, AML3, AML4, AML5, AML6, T-ALL, T-ALL_AML_T-cell, T-A ...	Microarray (Affymetrix)		Homo sapiens	Geo
	Chan	How are skeletal tissues derived from skeletal stem cells? Here, we map bone, cartilage, and stromal ...	17	pre-BCSP, BCSP, Thy chondrogenic population, BLSP, 6C3+ stromal population, HEC	Microarray (Affymetrix)		Mus musculus	Geo
	Chan	Monocytes are primary targets for human CMV (HCMV) infection and are proposed to be responsible for ...	12	mock infection 4h, HCMV-infected monocytes 4h post infection	Microarray (Affymetrix)		Homo sapiens	Geo
	Chan	Human embryonic stem cells (hESCs) are derived from the inner cell mass of the blastocyst. Despite s ...	6	ESC, 3iL ESC	RNASeq (Illumina)		Homo sapiens	ArrayExpress
	Chao	Understanding the relative contributions of genetic and epigenetic abnormalities to acute myeloid le ...	39	iPSC, ESC, PS-derived HP, Primary AML, relapse AML, Engrafted primary AML, Engrafted primary relapsed AML, engrafted iPSC-derived CD43+ HP	RNASeq (Illumina)		Homo sapiens	Geo
	Chaudhury	Acute myeloid leukaemia (AML) affects children and adults of all ages. AML remains one of the major ...	12	AML-fetal liver, AML 3 weeks, AML 10 weeks, AML 52 weeks and above	RNASeq (Illumina)		Mus musculus	Geo
	Chaudhury	Acute myeloid leukaemia (AML) affects children and adults of all ages. AML remains one of the major ...	8	52_week, 3_week	RNASeq (Illumina)		Mus musculus	Geo
	Chen	Leukemia inhibitory factor (LIF)/STAT3 signalling is a hallmark of naive pluripotency in rodent plur ...	33	Oscar, Oscar-STAT3-ERT2, Oscar-STAT3-ERT2 in LIF, TL2i Oscar-STAT3-ERT ...	Microarray (Affymetrix)		Homo sapiens	Geo
	Chen	Type 1 diabetes is an autoimmune destruction of pancreatic islet beta cell disease, making it import ...	7	ESC, EB, ESC-islet	Microarray (Affymetrix)		Homo sapiens	ArrayExpress
	Chen	Targeting of cancer stem cells is believed to be essential for curative therapy of cancers, but supp ...	6	normal, CML-like, CML-like + IM	Microarray (Affymetrix)	leukomics	Mus musculus	Geo
	Chen	We have shown that Alox5 is a critical regulator of leukemia stem cells (LSCs) in a BCR-ABL-induced ...	6	normal WT, CML-like WT, CML-like Alox5 KO	Microarray (Affymetrix)	leukomics	Mus musculus	Geo
	Chia	The derivation of human ES cells (hESCs) from human blastocysts represents one of the milestones in ...	6	ESC shRNA control, ESC PRDM14i	Microarray (Illumina)		Homo sapiens	ArrayExpress, Geo
	Chin	Induced pluripotent stem cells (iPSCs) outwardly appear to be indistinguishable from embryonic stem ...	6	fibroblast, iPSC, ESC	Microarray (Affymetrix)		Homo sapiens	Geo
	Chiu	The somatosensory nervous system is critical for the organism's ability to respond to mechanical, th ...	17	SNS-Cre/TdTomato+ DRG, IB4- SNS-Cre/Tdtomato+ DRG, IB4+ SNS-Cre/Tdtomato+ DRG, Parv-Cre/TdTomato+ DRG, WT DRG	Microarray (Affymetrix)		Mus musculus	Geo
	Chou	Patients with Down syndrome (trisomy 21, T21) have hematologic abnormalities throughout life. Newbor ...	6	iPSC-derived HPC, Tri21 iPSC-derived HPC	Microarray (Affymetrix)		Homo sapiens	Geo
	Christoforou	Although the differentiation of ES cells to cardiomyocytes has been firmly established, the extent ...	18	mESC- derived cardiomyocytes, Day 5 Nkx2-5 GFP- mESC-derived cell, Day ...	Microarray (Affymetrix)		Mus musculus	ArrayExpress
	Chu	BACKGROUND: Human pluripotent stem cells offer the best available model to study the underlying cell ...	34	ESC, ESC-derived DEC 12h, ESC-derived DEC 24h, ESC-derived DEC 36h, ES ...	RNASeq (Illumina)		Homo sapiens	Geo
	Chuang	Although clinical features, cytogenetics, and mutations are widely used to predict prognosis in pati ...	104	BMMC-AML patient alive, BMMC-AML patient dead	Microarray (Illumina)		Homo sapiens	Geo
	Chung	Use of animal feeder layers and serum containing media in the derivation and propagation of induced ...	21	ESC feeder derived, ESC feeder free, iPSC feeder derived, iPSC feeder free, fibroblast	Microarray (Affymetrix)		Homo sapiens	ArrayExpress, Geo
	Chung	Stem cells have the remarkable ability to grow indefinitely - a property known as self-renewal. Thes ...	6	low bFGF, high bFGF	Microarray (Illumina)		Homo sapiens	ArrayExpress, Geo
	Clancy	MicroRNAs (miRNAs) are critical to somatic cell reprogramming into induced pluripotent stem cells (i ...	13	2°MEF, D2H, D5H, D8H, D11H, D16H, D18H, D16L, D21L, D21Ø, 2⁰iPSC, ESC, 1⁰iPSC	miRNA (SOLiD)	grandiose	Mus musculus	SRA
	Collier	Human pluripotent stem cells (PSCs) exist in naive and primed states and provide important models to ...	24	Primed, 2i ESC sorted N4-, Nmin RNA, 2i ESC sorted N3+, 2i ESC sorted N4+, N4+ 5 passages, N4+ 10 passages, Naive	RNASeq (Illumina)		Homo sapiens	Geo
	Copley	Mouse haematopoietic stem cells (HSCs) undergo a postnatal transition in several properties, includi ...	8	BM-HSC, FL HSC Hmga2+/+, FL HSC Hmga2-/-	Microarray (Affymetrix)		Mus musculus	Geo
	Cortina	The analysis of stem cell hierarchies in human cancers has been hampered by the impossibility of ide ...	19	CRC PDO Lgr5+, CRC PDO Lgr5-, CRC PDO Lgr5+ Ki67+, CRC PDO Lgr5+ Ki67-, CRC PDO Lgr5- Ki67+, CRC PDO Lgr5- Ki67-	Microarray (Affymetrix)		Homo sapiens	Geo
	Costa	The limited availability of human vascular endothelial cells (ECs) hampers research into EC function ...	12	ESC, endothelial differentiation 6d, endothelial differentiation 12d, HUVEC	Microarray (Illumina)		Homo sapiens	ArrayExpress
	Cramer-Morales	Homologous recombination repair (HRR) protects cells from the lethal effect of spontaneous and thera ...	67	HSC, AP-CML HSC, BC-CML HSC, CP-CML HSC, MPP, AP-CML MPP, BC-CML MPP, ...	Microarray (Affymetrix)	leukomics	Homo sapiens	ArrayExpress, Geo
	Creamer	The generation of hematopoietic stem cells from human pluripotent stem cells (hPSCs) is a major goal ...	12	CD235a+ ESC-derived mesoderm WNTi, CD235a- ESC-derived mesoderm WNTi, CD235a- ESC-derived mesoderm	RNASeq (Illumina)		Homo sapiens	SRA
	da-Silva	Mesenchymal stromal cells (MSCs) are cultured cells that can give rise to mature mesenchymal cells u ...	8	adip-MSC, pericyte in DMEM, pericyte	Microarray (Agilent)		Homo sapiens	Geo
	Daneshvar	Long noncoding RNAs (lncRNAs) exhibit diverse functions, including regulation of development. Here, ...	12	ESC DIGIT+/+, DIGIT-/-, Endoderm day 4, DIGIT -/- Endoderm day 4	RNASeq (Illumina)		Homo sapiens	Geo
	Dani	The MET oncogene is aberrantly overexpressed in human osteosarcomas. We have previously converted pr ...	16	MSC, MSC+ osteogenic media 7 days, MSC+ osteogenic media 14 days, MSC+ osteogenic media 21 days, osteosarcoma	Microarray (Illumina)		Homo sapiens	ArrayExpress, Geo
	Danieli	The paracrine properties of human amniotic membrane-derived mesenchymal stromal cells (hAMCs) have n ...	24	fibroblast, BM_MSC, AM-MSC	Microarray (Illumina)		Homo sapiens	ArrayExpress, Geo
	DaSacco	Amniotic fluid is in continuity with multiple developing organ systems, including the kidney. Commit ...	12	hAKPC-P undifferentiated, hAKPC-P differentiated, hIPod de-differentiated, hIPod re-differentiated	Microarray (Affymetrix)		Homo sapiens	Geo
	DeJong	Escherichia coli and Staphylococcus epidermidis are predominant causes of neonatal sepsis, particula ...	43	preterm, term, preterm +Ecoli, term +Ecoli, preterm +Sepidermidis, term +Sepidermidis	RNASeq (Illumina)		Homo sapiens	Geo
	DeJong	Escherichia coli and Staphylococcus epidermidis are predominant causes of neonatal sepsis, particula ...	9	Preterm E.coli, Preterm S.epi, Preterm unstimulated, Preterm Chorioamn ...	RNASeq (Illumina)		Homo sapiens	Geo
	Dejosez	Ensuring cooperation among formerly autonomous cells has been a central challenge in the evolution o ...	8	shTop1/Mock mixed RNA, shTop1/Mock coculture, shp53/Mock mixed RNA, shp53/Mock coculture	Microarray (Affymetrix)		Mus musculus	Geo
	Delaforest	The availability of pluripotent stem cells offers the possibility of using such cells to model hepat ...	12	ESC-endoderm D5, ESC-hepatic progenitor D10, ESC-hepatocyte D15, ESC-hepatocyte D20 HNF4i3	Microarray (Affymetrix)		Homo sapiens	ArrayExpress
	Delorme	We previously identified multipotent stem cells within the lamina propria of the human olfactory muc ...	25	olfactory lamina propria, NPC, MSC, erythrocyte, granulocyte, leukocyte	Microarray (Affymetrix)		Homo sapiens	ArrayExpress, Geo
	delValle	The leukemia inhibitory factor (Lif) signaling pathway is a crucial determinant for mouse embryonic ...	9	Beta-catenin flox, Beta-catenin null, Beta-catenin null E-caderin-alpha fusion construct	Microarray (Affymetrix)		Mus musculus	ArrayExpress, Geo
	den-Hartogh	In vitro cardiac differentiation of human pluripotent stem cells (hPSCs) closely recapitulates in vi ...	24	ESC-derived pre-CP control day 5, ESC-derived pre-CP day 5, ESC-derive ...	Microarray (Illumina)		Homo sapiens	Geo
	Desai	Alveoli are gas-exchange sacs lined by squamous alveolar type (AT) 1 cells and cuboidal, surfactant- ...	6	E18 bipotent progenitors, AT2 Adult cells	Microarray (Affymetrix)		Mus musculus	Geo
	Desterke	Primary myelofibrosis is characterized by clonal myeloproliferation, dysmegakaryopoiesis, extramedul ...	12	BM-MSC, MSC myelofibrosis bone marrow	Microarray (Agilent)		Homo sapiens	Geo
	Dickinson	Multipotent mesenchymal stem cells (MSCs) have enormous potential in tissue engineering and regenera ...	8	Poor chondrogenic MSC, Highly chondrogenic MSC	Microarray (Affymetrix)		Homo sapiens	Geo
	Ding	Several cell types have been proposed to create niches for haematopoietic stem cells (HSCs). However ...	6	Whole BM, SCF-GFP+	Microarray (Affymetrix)		Mus musculus	ArrayExpress, Geo
	Doering	Exhausted CD8(+) T cells function poorly and are negatively regulated by inhibitory receptors. Trans ...	36	Naïve, Acute d6, Acute d8, Acute d15, Acute d30, Chronic d6, Chronic d8, Chronic d15, Chronic d30	Microarray (Affymetrix)		Mus musculus	Geo
	Doulatov	Human pluripotent stem cells (hPSCs) represent a promising source of patient-specific cells for dise ...	28	ESC-derived CMP, iPSC-derived CMP, iPSC-derived CMP, CP-derived HP, fe ...	Microarray (Affymetrix)		Homo sapiens	Geo
	Douvaras	Microglia, the immune cells of the brain, are crucial to proper development and maintenance of the C ...	24	microglia, microglia + serum free, iPSC-derived microglia, hepatic mac ...	RNASeq (Illumina)		Homo sapiens	Geo
	Doyle	Comparative analysis can provide important insights into complex biological systems. As demonstrated ...	107	Astrocytes Cerebellum TRAP, Astrocytes Cortex TRAP, Astrocytes Cortex ...	Microarray (Affymetrix)		Mus musculus	Geo
	Ebert	Spinal muscular atrophy is one of the most common inherited forms of neurological disease leading to ...	10	SMA iPSC, SMA fibroblast, ESC	Microarray (Affymetrix)		Homo sapiens	ArrayExpress, Geo
	Erny	As the tissue macrophages of the CNS, microglia are critically involved in diseases of the CNS. Howe ...	13	microglia + SPF mouse, microglia + GF mouse	RNASeq (Illumina)		Mus musculus	Geo
	Espagnolle	Bone marrow mesenchymal stem cells (MSCs) are plastic adherent cells that can differentiate into var ...	12	MSC, MSC clone CD146 low, MSC clone CD146 hi	Microarray (Affymetrix)		Homo sapiens	ArrayExpress, Geo
	Evseenko	Our understanding of how mesodermal tissue is formed has been limited by the absence of specific and ...	6	ESC, ESC-derived mesoderm	Microarray (Affymetrix)		Homo sapiens	ArrayExpress
	Fairfax	To systematically investigate the impact of immune stimulation upon regulatory variant activity, we ...	1448	naïve CD14+, media 24hr, LPS 2hr, LPS 24hr, IFNg 24hr	Microarray (Illumina)		Homo sapiens	ArrayExpress
	Fang	Dextran sodium sulfate (DSS)-induced colitis is widely used to study pathological mechanisms and pot ...	23	Control, 2 days, 4 days, 6 days	Microarray (Affymetrix)		Mus musculus	ArrayExpress, Geo
	Fang	Genome-wide expression analysis of embryonic development provides information that is useful in a va ...	18	Stage 9, Stage 10, Stage 11, Stage 12, Stage 13, Stage 14	Microarray (Affymetrix)		Homo sapiens	Geo
	Fasano	The floor plate (FP) is a critical signaling center during neural development located along the vent ...	30	NSB neural induction 1d, NSB neural induction 2d, NSB neural induction ...	Microarray (Illumina)		Homo sapiens	ArrayExpress, Geo
	Felthaus	Human dental follicle cells (DFCs) are progenitor cells. Recent studies supposed that osteogenic dif ...	12	Dental Follicle Cells in osteogenic media, DFC + Dexamethasone, DFC + BMP2, DFC + IGF2	Microarray (Affymetrix)		Homo sapiens	Geo
	Frobel	Standardization of mesenchymal stromal cells (MSCs) remains a major obstacle in regenerative medicin ...	8	BM-MSC derived iPSC, iPSC-MSC day 7, iPSC-MSC day 14, iPSC-MSC day 21, iPSC-MSC day 28, iPSC-MSC day 35	Microarray (Affymetrix)		Homo sapiens	Geo
	Fu	Despite accumulating evidence for a mammary differentiation hierarchy, the basal compartment compris ...	9	basal MaSC Lgr5+, basal MaSC Lgr5-, luminal MaSC	Microarray (Illumina)		Mus musculus	Geo
	Fukuta	Neural crest cells (NCCs) are an embryonic migratory cell population with the ability to differentia ...	16	ESC, iPSC, NCC, NCC - derived MSC	Microarray (Illumina)		Homo sapiens	Geo
	Furtado	RATIONALE: Cardiac fibroblasts are critical to proper heart function through multiple interactions ...	5	Tail fibroblast, Heart fibroblast	Microarray (Agilent)		Mus musculus	Geo
	Gafni	Mouse embryonic stem (ES) cells are isolated from the inner cell mass of blastocysts, and can be pre ...	12	ESC, Naïve_hESC, Naïve_hiPSC	Microarray (Affymetrix)		Homo sapiens	Geo
	Gallagher	PURPOSE: The improved surgical outcomes associated with transplantation of cultivated amniotic membr ...	9	cornea, cultured limbal epithelium, cultured limbal fibroblast	Microarray (Affymetrix)		Homo sapiens	Geo
	Gautier	We assessed gene expression in tissue macrophages from various mouse organs. The diversity in gene e ...	89	blood Ly6C- mo, blood Ly6C+ mo, blood MHCII- mo, blood MHCII-int mo, B ...	Microarray (Affymetrix)		Mus musculus	Geo
	Genbacev	Placental trophoblasts are key determinants of in utero development. Mouse trophoblast stem cells (m ...	11	ESC, explanted chorion, explanted chorion CFU, chorionic villi	Microarray (Affymetrix)		Homo sapiens	ArrayExpress, Geo
	Gerber	The persistence leukemia stem cells (LSCs) in chronic myeloid leukemia (CML) despite tyrosine kinase ...	20	HSC, CML HSC, HSP, CML HSP	Microarray (Affymetrix)	leukomics	Homo sapiens	ArrayExpress, Geo
	Giobbe	The therapeutic potential of human pluripotent stem (hPS) cells is threatened, among various problem ...	9	EB hydrogel 1X, EB hydrogel 2X, EB suspension	Microarray (Agilent)		Homo sapiens	ArrayExpress, Geo
	Giulitti	Induced pluripotent stem cells (iPSCs) are generated via the expression of the transcription factors ...	13	fibroblast, iPSC, 2iLGo ESC, RSeT iPSC	RNASeq (Illumina)		Homo sapiens	Geo
	Gottschling	Background: Cancer-associated fibroblasts (CAF) play a vital role in lung cancer initiation and prog ...	10	lung MSC, MSC NSC Lung Cancer	Microarray (Affymetrix)		Homo sapiens	ArrayExpress, Geo
	Graham	Quiescent and dividing hemopoietic stem cells (HSC) display marked differences in their ability to m ...	13	CML G0, HSPC G0, CML cycling, HSPC cycling	Microarray (Affymetrix)	leukomics	Homo sapiens	ArrayExpress
	Granchi	Bone marrow is commonly used as a source of adult multipotent mesenchymal stem cells (MSCs), defined ...	46	GF MSC, confluent MSC, MSC + dex 24h, osteoblast, + β-glycerophosphate 24h, + β-glycerophosphate 7d, mineralized culture	Microarray (Affymetrix)		Homo sapiens	Geo
	Grossman	Interest focuses on genes encoding histone demethylases in hematologic malignancies, such as EZH2 (e ...	28	MC fusion EZH2-unmutated, MC fusion EZH2-mutated, MC fusion mixed_T EZ ...	Microarray (Affymetrix)		Homo sapiens	Geo
	Gubernator	Background: Blood vessel wall adventitial progenitors may yield a renewable source for therapeutic v ...	5	adventitial MSC low blood flow, adventitial MSC int blood flow, adventitial MSC high blood flow	Microarray (Agilent)		Homo sapiens	ArrayExpress, Geo
	Guenther	Knowledge of both the global chromatin structure and the gene expression programs of human embryonic ...	39	fibroblast, BG01, BG03, H9, WIBR1, WIBR2, WIBR3, WIBR7, iPSC line 4, i ...	Microarray (Affymetrix)		Homo sapiens	ArrayExpress, Geo
	Guerra-Laso	Differences in the activity of monocytes/macrophages, important target cells of Mycobacterium tuberc ...	13	F Control Mo +MTB, F TB patient Mo +MTB, M Control Mo +MTB, M TB patient Mo +MTB	Microarray (Agilent)		Homo sapiens	Geo
	Guijarro-Muñoz	Pericytes and mesenchymal stem cells (MSCs) are ontogenically related, and in fact, no significant p ...	12	MSC, HBVP, HBVP +LPS	Microarray (Affymetrix)		Homo sapiens	Geo
	Guo	Conventional generation of stem cells from human blastocysts produces a developmentally advanced, or ...	7	HNES1, HNES2, HNES3	RNASeq (Illumina)		Homo sapiens	ArrayExpress
	Götherstrom	Human mesenchymal stem cells circulate in 1st and early 2nd trimester fetal blood, but not in adults ...	12	FBM MSC, FB MSC, FL MSC, PBMC	Microarray (Affymetrix)		Homo sapiens	Geo
	Hale	CD4(+) T follicular helper (Tfh) cells provide the required signals to B cells for germinal center r ...	22	Naive, Day 6 Ly6Clo CXCR5- TcR Tg, Day 6 Ly6Clo CXCR5+ TcR Tg, Day 6 L ...	Microarray (Affymetrix)		Mus musculus	Geo
	Halevy	Down syndrome (DS) is the leading genetic cause of mental retardation and is caused by a third copy ...	8	Control NPC, DS NPC	Microarray (Affymetrix)		Homo sapiens	Geo
	Hamidouche	Adult human mesenchymal stromal cells (hMSCs) have the potential to differentiate into chondrogenic, ...	12	MSC 0d, MSC osteo diff day 1, MSC osteo diff day 3, MSC osteo diff day 7	Microarray (Affymetrix)		Homo sapiens	Geo
	Han	BACKGROUND: Human pluripotent stem cells (hPSCs) provide powerful models for studying cellular diffe ...	12	Day 0, Day 3, Day 6, Day 10, Day 15, Day 20	RNASeq (Illumina)		Homo sapiens	Geo
	Han	Embryonic stem cells (ESCs) comprise at least two populations of cells with divergent states of plur ...	11	ESC, EpiSC, T9 EpiSC, +Oct4_GFP EpiSC, EpiSC +Sox2 transgene, -GFP EpiSC	Microarray (Illumina)		Mus musculus	Geo
	Haniffa	Dendritic cell (DC)-mediated cross-presentation of exogenous antigens acquired in the periphery is c ...	49	CD16+ CD14lo Mo, CD14+ CD16- Mo, CD14+ CD16+ Mo, blood CD1c+ DC, blood ...	Microarray (Illumina)		Homo sapiens	Geo
	Haniffa	Dendritic cell (DC)-mediated cross-presentation of exogenous antigens acquired in the periphery is c ...	15	pDC, DC Gr1lo, DC Gr1hi, Spleen CD11b+CD4+ DC, Spleen CD11b+CD8+ DC	Microarray (Illumina)		Mus musculus	Geo
	Hart	Many controversial results exist when comparing mesenchymal stromal cells (MSCs) derived from differ ...	25	BM-derived MSC, fetal pMSC, maternal pMSC	Microarray (Affymetrix)		Homo sapiens	Geo
	Hartl	Mouse embryonic brain development involves sequential differentiation of multipotent progenitors int ...	16	E9.5 embryo head, E11.5 embryo head, E13.5 embryo head	Microarray (Affymetrix)		Mus musculus	ArrayExpress, Geo
	Hartogh	Understanding early differentiation events leading to cardiogenesis is crucial for controlling fate ...	9	ESC MESP1-mCherry reporter, MESP1- D3, MESP1+ D3	Microarray (Illumina)		Homo sapiens	Geo
	Hasegawa	Human embryonic stem cells (hESCs) exhibit pluripotency and indefinite proliferation and are a poten ...	9	KhES, KhES1, KhES2	Microarray (Affymetrix)		Homo sapiens
	Hayashi	The eye is a complex organ with highly specialized constituent tissues derived from different primor ...	19	iPSC, iPSC-derived ocular surface ectoderm, iPSC-derived corneal epithelial cells, corneal epithelial cells, keratinocyte, fibroblast	Microarray (Agilent)		Homo sapiens	Geo
	Hayashi	The generation of properly functioning gametes in vitro requires reconstitution of the multistepped ...	12	ESC, EpiLC day 1, EpiLC day 2, EpiLC day 3, EpiSC, PGCLC	Microarray (Affymetrix)		Mus musculus	Geo
	Hayashi	The generation of properly functioning gametes in vitro requires reconstitution of the multistepped ...	12	ESC PCR amplified, EpiLC day 2 PCR amplified, EpiSC PCR amplified, epiblast PCR amplified, PGCLC PCR amplified, PGC E9.5 PCR amplified	Microarray (Affymetrix)		Mus musculus	Geo
	Healy	Multifocal inflammatory lesions featuring destruction of lipid-rich myelin are pathologic hallmarks ...	30	MDM-CSF1, MDM +IFNg +LPS 2d, MDM + IL4 + IL13 2d, MDM + IL4 + IL13 +IL ...	Microarray (Affymetrix)		Homo sapiens	Geo
	Heidkamp	In mice, conventional and plasmacytoid dendritic cells (DCs) derive from separate hematopoietic prec ...	37	B-cell, CD8+ T-cell, CD4+ T-cell, CD14+ monocyte, PB CD1c+ DC, spleen ...	Microarray (Agilent)		Homo sapiens	Geo
	Henrickson	T cells are activated by antigen (Ag)-bearing dendritic cells (DCs) in lymph nodes in three phases. ...	35	1uM peptide 12 hours, 1uM peptide 24 hours, 100uM peptide 12 hours, 0uM peptide 24 hours, 0uM peptide 12 hours, 100uM peptide 24 hours	Microarray (Affymetrix)		Mus musculus	ArrayExpress, Geo
	Herz	Several viruses can infect the mammalian nervous system and induce neurological dysfunction. Adoptiv ...	6	CX3CR1-GFP+ microglia from control (LCMV infected) mice, CD11c-YFP+ microglia post-transfer of LCMV-specific T cells	Microarray (Affymetrix)		Mus musculus	Geo
	Hibaoui	Down syndrome (trisomy 21) is the most common viable chromosomal disorder with intellectual impairme ...	7	euploid sibling, trisomy21 sibling	RNASeq (Illumina)		Homo sapiens	Geo
	Hirsch	Like normal colorectal epithelium, colorectal carcinomas (CRCs) are organized hierarchically and inc ...	27	Primary Lgr5_EGFP+ colon cells, Tumour Lgr5_EGFP+ colon cells, Primary Lgr5_EGFP- colon cells, Tumour Lgr5_EGFP- colon cells	Microarray (Agilent)		Mus musculus	Geo
	Hirsch	Like normal colorectal epithelium, colorectal carcinomas (CRCs) are organized hierarchically and inc ...	12	SW480 colony, SW480 monolayer, SW480 + empty vector, SW480 + siLGR5	Microarray (Agilent)		Homo sapiens	Geo
	Hokama	Diabetes mellitus (DM) is considered to be a risk factor for dementia including Alzheimer's disease ...	79	frontal cortex, frontal cortex AD, hippocampus, hippocampus AD, temporal cortex, temporal cortex AD	Microarray (Affymetrix)		Homo sapiens	ArrayExpress, Geo
	Homayounfar	OBJECTIVE: Previous investigations suggest that the embryonic origins of the calvarial tissues (neur ...	48	frontal calvaria, metopic suture, sagittal suture	Microarray (Affymetrix)		Homo sapiens	Geo
	Honda-Ozaki	Nakajo-Nishimura syndrome (NNS) is an immunoproteasome-associated autoinflammatory disorder caused b ...	8	imac PSMB8-WT, Nakajo-Nishimura syndrome iMAC PSMB8 602G-T, imac PSMB8-WT +IFN+TNF, Nakajo-Nishimura syndrome iMAC PSMB8 602G-T +IFN+TNF	RNASeq (Illumina)		Homo sapiens	Geo
	Hou	BACKGROUND: Mesenchymal stem cells (MSCs) are likely involved in pathological processes of immune-r ...	12	healthy MSC, MSC psoriasis	Microarray (Agilent)		Homo sapiens	Geo
	Hough	BACKGROUND: Commitment in embryonic stem cells is often depicted as a binary choice between alternat ...	12	ESC GCTM2 (neg) CD9 (neg), ESC GCTM2 (low) CD9 (low), ESC GCTM2 (mid) CD9 (mid), ESC GCTM2 (high) CD9 (high)	Microarray (Illumina)		Homo sapiens	ArrayExpress, Geo
	Hu	Reprogramming blood cells to induced pluripotent stem cells (iPSCs) provides a novel tool for modeli ...	19	fibroblast, BM-MNC, Fib-iPSC, BM-MNC_iPSC, CB-iPSC, CML-iPSC, ESC	Microarray (Affymetrix)	leukomics	Homo sapiens	ArrayExpress, Geo
	Hu	BACKGROUND: The endosteum of the bone marrow provides a specialized hypoxic niche that may serve to ...	6	MSC hypoxia, MSC normoxia	Microarray (Agilent Technologies)		Homo sapiens	Geo
	Hurtz	Chronic myeloid leukemia (CML) is induced by the oncogenic BCR-ABL1 tyrosine kinase and can be effec ...	10	WT, WT + IM, WT + IM + RI-BPI, BCL6 KO, BCL6 KO + IM	Microarray (Affymetrix)	leukomics	Mus musculus	Geo
	Hussein-Puri-Tonge	Somatic cell reprogramming to a pluripotent state continues to challenge many of our assumptions abo ...	13	2°MEF, D2H, D5H, D8H, D11H, D16H, D18H, D16L, D21L, D21Ø, 2⁰iPSC, ESC, 1⁰iPSC	ChIPSeq (Illumina)	grandiose	Mus musculus	SRA
	Hussein-Puri-Tonge	Somatic cell reprogramming to a pluripotent state continues to challenge many of our assumptions abo ...	13	2°MEF, D2H, D5H, D8H, D11H, D16H, D18H, D16L, D21L, D21Ø, 2⁰iPSC, ESC, 1⁰iPSC	ChIPSeq (Illumina)	grandiose	Mus musculus	SRA
	Hussein-Puri-Tonge	Somatic cell reprogramming to a pluripotent state continues to challenge many of our assumptions abo ...	13	2°MEF, D2H, D5H, D8H, D11H, D16H, D18H, D16L, D21L, D21Ø, 2⁰iPSC, ESC, 1⁰iPSC	ChIPSeq (Illumina)	grandiose	Mus musculus	SRA
	Hussein-Puri-Tonge	Somatic cell reprogramming to a pluripotent state continues to challenge many of our assumptions abo ...	13	2°MEF, D2H, D5H, D8H, D11H, D16H, D18H, D16L, D21L, D21Ø, 2⁰iPSC, ESC, 1⁰iPSC	RNASeq (Life Technologies)	grandiose	Mus musculus	SRA
	Hussein-Puri-Tonge	Somatic cell reprogramming to a pluripotent state continues to challenge many of our assumptions abo ...	13	2°MEF, D2H, D5H, D8H, D11H, D16H, D18H, D16L, D21L, D21Ø, 2⁰iPSC, ESC, 1⁰iPSC	Methylation (Illumina)	grandiose	Mus musculus	ENA
	Hussein-Puri-Tonge	Somatic cell reprogramming to a pluripotent state continues to challenge many of our assumptions abo ...	10	D0, D2H, D5H, D8H, D11H, D16H, D18H, 2⁰iPSC, ESC, 1⁰iPSC	Proteomics (Thermo Scientific)	grandiose	Mus musculus	PXD
	Idaghdour	The host mechanisms responsible for protection against malaria remain poorly understood, with only a ...	155	control Hb-AA, control Hb-AS, control Hb-AC, LP Hb-AA, LP Hb-AC, LP Hb-AS, HP Hb-AA, HP Hb-AC, HP Hb-AS	Microarray (Illumina)		Homo sapiens	Geo
	Ieda	Cardiomyocytes are heart muscle cells. The repair of damaged heart tissue is a significant medical c ...	18	cardiac fibroblasts, week 2 cardiac fibroblasts GFP-, week 4 cardiac f ...	Microarray (Affymetrix)		Mus musculus	Geo
	Isern	Mesenchymal stem cells (MSCs) and osteolineage cells contribute to the hematopoietic stem cell (HSC) ...	8	Pdgfrα+ MSC, Pdgfrα− Schwann cell precursors, Pdgfra+ stromal cells, stromal cells	RNASeq (Illumina)		Mus musculus	Geo
	Iwayama	Fibrosis is a common disease process in which profibrotic cells disturb organ function by secreting ...	6	Pericyte WT mice, PDGFR-induced fibrotic pericyte	RNASeq (Illumina)		Mus musculus	Geo
	Jalan-Sakrikar	BACKGROUND & AIMS: Developmental morphogens play an important role in coordinating the ductular reac ...	18	iPSC, iEndoderm day 4, iHep day 8, iHep day 12, iPSC Derived Cholangiocytes, cholangiocyte	RNASeq (Illumina)		Homo sapiens	Geo
	James	Bone marrow stromal cells (BMSCs, also called bone-marrow-derived mesenchymal stromal cells) provide ...	15	BM MSC, tripotent hTERT-MSC Y101, tripotent hTERT-MSC Y201, hTERT-MSC Y102, hTERT-MSC Y202	Microarray (Agilent)		Homo sapiens	ArrayExpress
	Jameson	The divergence of distinct cell populations from multipotent progenitors is poorly understood, parti ...	91	endothelial cells (11.5 dpc), vascular associated mesenchymal cells - ...	Microarray (Affymetrix)		Mus musculus	ArrayExpress, Geo
	Jansen	Stem cells are widely studied to enable their use in tissue repair. However, differences in function ...	8	A-MSC, BM-MSC, CB-MSC	Microarray (Affymetrix)		Homo sapiens	Geo
	Jia	Generation of iPSCs by nonviral methods is increasingly used, as viral transduction methods present ...	18	MSC, MSC-iPSC lentivirus, MSC-iPSC minicircle, fib-iPSC episomal, ESC	Microarray (Affymetrix)		Homo sapiens	ArrayExpress, Geo
	Jiang	Down's syndrome is a common disorder with enormous medical and social costs, caused by trisomy for c ...	27	iPSC-DS, iPSC-DS XIST-control, iPSC-DS DOX control, iPSC-DS XIST-T21i	Microarray (Affymetrix)		Homo sapiens	Geo
	Jones	Human embryonic stem cells (hESC) require a balance of growth factors and signalling molecules to pr ...	9	dermal fibroblast, FL fibroblast, SEDC	Microarray (Affymetrix)		Homo sapiens	ArrayExpress, Geo
	Kaewkhaw	The derivation of three-dimensional (3D) stratified neural retina from pluripotent stem cells has pe ...	23	ESC D0, ES-derived retinal cup CRX-GFPneg cells D37, ES-derived retina ...	RNASeq (Illumina)		Homo sapiens	Geo
	Kamei	Human pluripotent stem cells hold great promise for applications in drug discovery and regenerative ...	15	ESC suspension, ESC on MG, ESC on mebil, ESC on 80%mebil, fibroblast	Microarray (Agilent)		Homo sapiens	Geo
	Kang	Tuberculosis (TB) is caused by the intracellular bacteria Mycobacterium tuberculosis, and kills more ...	13	Day_0, Day_12, Day_15, Day_21	Microarray (Affymetrix)		Mus musculus	Geo
	Kang	Human palatine tonsils are oropharyngeal lymphoid tissues containing multiple invaginations (crypts) ...	10	tonsil surface CD44+NGFR+, tonsil crypt CD44+NGFR+, tonsil surface, tonsil crypt	Microarray (Illumina)		Homo sapiens	Geo
	Karlsson	To develop a simple and efficient method for producing homogeneous populations of monocytes and macr ...	9	monocyte, ESC-derived monocyte, ESC-derived macrophage	Microarray (Affymetrix)		Homo sapiens	ArrayExpress, Geo
	Karlsson	In an attempt to discover novel growth factors for hematopoietic stem and progenitor cells (HSPCs), ...	9	CCL28 HSPC, SCF HSPC, TPO HSPC	Microarray (Affymetrix)		Homo sapiens	Geo
	Khalid	Human dental pulp stem cells (DPSCs) isolated from adult dental pulp are multipotent mesenchymal ste ...	24	DPSC no treatment at 24h, DPSC no treatment at 48h, DPSC 1mM EtOH at 2 ...	Microarray (Affymetrix)		Homo sapiens	Geo
	Kilpinen	Technology utilizing human induced pluripotent stem cells (iPS cells) has enormous potential to prov ...	67	feeder-free iPSC 0114pf-bezi, feeder-free iPSC 0114pf-eip, feeder-free ...	RNASeq (Illumina)		Homo sapiens	ArrayExpress
	Kim	The first stages of embryonic differentiation are driven by signaling pathways hardwired to induce p ...	16	ESC, 1d ESC+activin, 3d ESC+activin, 5d ESC+activin	Microarray (Affymetrix)		Homo sapiens	ArrayExpress, Geo
	Kim	Hepatocytes that have differentiated from human embryonic stem cells (hESCs) have great potential fo ...	12	ESC, ESC-derived DE, ESC-derived hepatocyte	Microarray (Illumina)		Homo sapiens	ArrayExpress, Geo
	Kim	Induced pluripotent stem (iPS) cells have been generated from mouse and human somatic cells by ectop ...	10	H1, H9, 1F-reprogrammed iPSC, 2F-reprogrammed iPSC, hNSC	Microarray (Illumina)		Homo sapiens	ArrayExpress, Geo
	Kim	PURPOSE: Pathophysiological events in the retinal ganglion cell layer (GCL) are a prominent feature ...	6	Ganglion Layer, Outer Retina	Microarray (Affymetrix)		Homo sapiens
	Klein	BACKGROUND: Multiple gene expression signatures derived from microarray experiments have been publis ...	251	MC AML with karyotype 1, MC AML with karyotype 2, MC AML with karyotyp ...	Microarray (Affymetrix)		Homo sapiens	Geo
	Kobayashi	Non-syndromic cleft lip/palate (NSCL/P) is a complex, frequent congenital malformation, determined b ...	13	control donor, cleft donor	Microarray (Affymetrix)		Homo sapiens	Geo
	Koch	Pluripotent stem cells evade replicative senescence, whereas other primary cells lose their prolifer ...	6	Early passage MSC, Late passage MSC	Microarray (Affymetrix)		Homo sapiens	ArrayExpress, Geo
	Kojima	Mouse epiblast stem cells (EpiSCs) can be derived from a wide range of developmental stages. To char ...	112	fibroblast (MEF), iPSC, mESC, EpiSC9, EpiSC_CAV, EpiSC_PS, EpiSC_LMS, ...	Microarray (Illumina)		Mus musculus	Geo
	Kolle	Surface marker expression forms the basis for characterization and isolation of human embryonic stem ...	36	H9_TESR_P4, H9_TESR_P5, H9_TESR_P6, H9_TESR_P7, HES2_KOSR_P4, HES2_KOS ...	Microarray (Illumina)		Homo sapiens	Geo
	Kondo	Oligomeric forms of amyloid-β peptide (Aβ) are thought to play a pivotal role in the pathogenesis of ...	6	iPSC-derived neuron, APP-delta iPSC-derived neuron	Microarray (Affymetrix)		Homo sapiens	Geo
	Kouroupis	In the present study, we combined stem cell technology with a non-absorbable biomaterial for the rec ...	21	iPSC, MSC, iPSC-derived MSC, MSC in matrigel BMP2 FGF2, iPSC-derived M ...	Microarray (Affymetrix)		Homo sapiens	Geo
	Koyanagi-Aoi	We examined the gene expression and DNA methylation of 49 human induced pluripotent stem cells (hiPS ...	70	PBMC, cord blood cell, fibroblast, dental pulp cell, ECC, CCL, ESC, iPSC	Microarray (Agilent)		Homo sapiens	ArrayExpress, Geo
	Koyanagi-Aoi	We examined the gene expression and DNA methylation of 49 human induced pluripotent stem cells (hiPS ...	50	Fib-derived iPSC, defective diff., Fib-derived iPSC, CB-derived iPSC, PBMC-derived iPSC, DP-derived iPSC, ESC	Microarray (Agilent)		Homo sapiens	Geo
	Krause	Recent reports of directed reprogramming have raised questions about the stability of cell lineages. ...	8	SKP face, SKP foreskin	Microarray (Affymetrix)		Homo sapiens	Geo
	Kreitzer	Neural crest (NC) cells contribute to the development of many complex tissues of all three germ laye ...	6	iPSC, iPSC - derived NCC	Microarray (Affymetrix)		Homo sapiens	Geo
	Kriks	Human pluripotent stem cells (PSCs) are a promising source of cells for applications in regenerative ...	72	ESC, ESC-derived hypothalamic neuron 3d, ESC-derived hypothalamic neur ...	Microarray (Illumina)		Homo sapiens	ArrayExpress, Geo
	Krupka	Infection with Plasmodium falciparum can lead to a range of severe to minimal symptoms, occasionally ...	10	Mild Malaria, Severe Malaria	Microarray (Affymetrix)		Homo sapiens	Geo
	Kubo	Background. The in vivo distribution status and molecular signature of bone marrow mesenchymal stem ...	15	fibroblast, MSC, adipocyte, chondrocyte, osteocyte	Microarray (Affymetrix)		Homo sapiens	ArrayExpress, Geo
	Kumar	Elucidating the pathways that lead to vasculogenic cells, and being able to identify their progenito ...	26	pericyte, ESC-derived MAB, ESC-derived MSC, ESC-derived imPC, ESC-derived PC1, ESC-derived PC2, smooth muscle, ESC-derived iSM, ESC-derived SM	RNASeq (Illumina)		Homo sapiens	Geo
	Kutlu	Pancreatic islet transplantation as a potential cure for type 1 diabetes (T1D) cannot be scaled up d ...	33	explanted pancreatic islet, reaggregated islets NIH protocol, islets g ...	Microarray (Affymetrix)		Homo sapiens	Geo
	Kyrkou	Herein, we describe a modified protocol for the generation of human induced pluripotent stem cells ( ...	10	iPSC line 1, iPSC line 2, iPSC line 3, ESC, fibroblast	Microarray (Affymetrix)		Homo sapiens	Geo
	König	Mesenchymal stromal cells derived from the human amnion (hAMSC) currently play an important role in ...	6	MSC, MSC-derived endothelium	Microarray (Affymetrix)		Homo sapiens	Geo
	Lacey	GM-CSF and M-CSF (CSF-1) induce different phenotypic changes in macrophage lineage populations. The ...	12	MDM CSF1, MDM CSF1 DEX, MDM CSF-1 GM-CSF, MDM GM-CSF	Microarray (Agilent)		Homo sapiens	ArrayExpress
	Lacey	GM-CSF and M-CSF (CSF-1) induce different phenotypic changes in macrophage lineage populations. The ...	6	BMM differentiated in M-CSF, BMM differentiated in GM-CSF	Microarray (Agilent)		Mus musculus	ArrayExpress
	Laresgoiti	Insufficient alveolar gas exchange capacity is a major contributor to lung disease. During lung deve ...	10	E11.5 lung tip, E17.5 lung Id2-GFP+ cells	Microarray (Affymetrix)		Mus musculus	Geo
	Larson	Human mesenchymal stem cells or multipotent stromal cells (MSCs) are of interest for clinical therap ...	6	MSC log growth phase, MSC confluent	Microarray (Affymetrix)		Homo sapiens	Geo
	Lee	Human pluripotent stem cells (hPSCs) have been reported in naive and primed states. However, the abi ...	18	CB_iPSC 2iL, Fib_iPSC 2iL, CB_iPSC, Fib_iPSC	Microarray (Affymetrix)		Homo sapiens	Geo
	Lee	Reprogramming of somatic cells to induced pluripotent stem cells involves a dynamic rearrangement of ...	13	2°MEF, D2H, D5H, D8H, D11H, D16H, D18H, D16L, D21L, D21Ø, 2⁰iPSC, ESC, 1⁰iPSC	Methylation (Illumina)	grandiose	Mus musculus	ENA
	Lee	Stem cell transplantation for regenerative medicine has made significant progress in various injury ...	9	MSC mock labelled, MSC M600 labelled, MSC ferucarbotran labelled	Microarray (Affymetrix)		Homo sapiens	ArrayExpress, Geo
	Lee	Human pluripotent stem cells (hPSCs) have been reported in naive and primed states. However, the abi ...	8	iPSC control shRNA, 2iL iPSC control shRNA, 2iL iPSC shPOU5F1, 2iL iPSC shNanog	RNASeq (Illumina)		Homo sapiens	Geo
	Lee	Human pluripotent stem cells (hPSCs) have been reported in naive and primed states. However, the abi ...	6	iPSC cultured in ESGRO LIF, iPSC cultured in bFGF	Microarray (Affymetrix)		Mus musculus	Geo
	Li	The directed differentiation of forebrain neuronal types from human embryonic stem cells (hESCs) has ...	12	ESC, ESC D6, ESC-NE D10, ESC-NE D17	Microarray (Affymetrix)		Homo sapiens	ArrayExpress
	Li	Whole brain irradiation remains important in the management of brain tumors. Although necessary for ...	12	Cd11b+ brain cells C57BL/6, Cd11b+ brain cells BALB/c, Cd11b+ brain ce ...	Microarray (Affymetrix)		Mus musculus	Geo
	Li	A majority of the studies examining the molecular regulation of human labor have been conducted usin ...	9	amniocyte, +IL1b 1h, +IL1b 8h	Microarray (Affymetrix)		Homo sapiens	Geo
	Li	Human trisomies can alter cellular phenotypes and produce congenital abnormalities such as Down synd ...	8	iPSC trisomy 21, iPSC-euploid, ESC	Microarray (Illumina)		Homo sapiens	Geo
	Li	Whole brain irradiation remains important in the management of brain tumors. Although necessary for ...	8	C57BL6 microglia control, C57BL6 microglia + irradiation, BALBc microglia control, BALBc microglia + irradiation	RNASeq (Illumina)		Mus musculus	SRA
	Li	Human embryonic stem cells (hESCs) hold enormous promise for regenerative medicine. Typically, hESC- ...	6	ESC, ESC-NPC	Microarray (Illumina)		Homo sapiens	ArrayExpress, Geo
	Li	MicroRNAs (miRNAs) are noncoding RNAs of approximately 22 nucleotides in length that negatively regu ...	5	ESC, EB	Microarray (Affymetrix)		Homo sapiens	ArrayExpress
	Liang	Alzheimer's disease (AD) is associated with regional reductions in fluorodeoxyglucose positron emiss ...	161	entorhinal cortex, entorhinal cortex AD, hippocampus, hippocampus AD, ...	Microarray (Affymetrix)		Homo sapiens	Geo
	Lim	PURPOSE: The presence of multipotent human limbal stromal cells resembling mesenchymal stromal cell ...	15	BM MSC, adipose-MSC, fibroblast, limbal FBS, limbal matrigel	Microarray (Agilent)		Homo sapiens	Geo
	Lim	Basal-like breast cancers arising in women carrying mutations in the BRCA1 gene, encoding the tumor ...	12	fibroblast, MaSC, luminal progenitor, mature luminal cell	Microarray (Illumina)		Homo sapiens	ArrayExpress, Geo
	Lin	The kidney is a complex tissue made up of more than 26 specialised cell types. Many of these come fr ...	12	HES4, ESC_mesoderm conditions, PODXL+CD24+GCTM+, renal progenitor enriched sorted on PODXL+CD24+GCTM-	Microarray (Illumina)		Homo sapiens	ArrayExpress
	Lindstedt	Human dendritic cells (DCs) are a distinct but heterogeneous lineage of APCs operating as the link b ...	21	CD16+ monocyte, blood BDCA1+ DC, tonsil BDCA1+ DC, blood BDCA3+ DC, tonsil BDCA3+ DC, blood pDC, tonsil pDC	Microarray (Affymetrix)		Homo sapiens	ArrayExpress
	Liu	Recent reports on the characteristics of naive human pluripotent stem cells (hPSCs) obtained using i ...	37	hiPSC mRNA primed, hESC/hiPSC primed, hiPSC cRSet, hiPSC rRSet p3-8, h ...	RNASeq (Illumina)		Homo sapiens	SRA
	Liu	Hutchinson-Gilford progeria syndrome (HGPS) is a rare and fatal human premature ageing disease, char ...	10	fibroblast, HGPS fibroblast, HGPS iPSC, iPSC, ESC	Microarray (Affymetrix)		Homo sapiens	Geo
	Liu	Fanconi Anemia (FA) is a recessive disorder characterized by genomic instability, congenital abnorma ...	9	iPSC-derived NP, iPSC-derived NP corrected, iPSC-derived NP FA	Microarray (Affymetrix)		Homo sapiens	Geo
	Liu	T follicular helper (Tfh) cells play a pivotal role in germinal center reactions, which requires Bcl ...	6	activated non-Tfh cells, Intermediate T-follicular helper, T-follicular helper	Microarray (Affymetrix)		Mus musculus	Geo
	Lockstone	The mechanisms by which trisomy 21 leads to the characteristic Down syndrome (DS) phenotype are uncl ...	15	control female, DS Female, control male, DS Male	Microarray (Affymetrix)		Homo sapiens	Geo
	Lodato	SOX2 is a master regulator of both pluripotent embryonic stem cells (ESCs) and multipotent neural pr ...	6	mouse embryonic stem cell, mouse neural precursor cell	Microarray (Affymetrix)		Mus musculus	Geo
	Loewer	The conversion of lineage-committed cells to induced pluripotent stem cells (iPSCs) by reprogramming ...	14	MSC, MRC5, Fib, MSC-iPSC, MRC-iPSC, fib-iPSC, ESC	Microarray (Affymetrix)		Homo sapiens	ArrayExpress, Geo
	Loh	Human pluripotent stem cell (hPSC) differentiation typically yields heterogeneous populations. Knowl ...	24	ESC, APS, ESC-endoderm 3d, ESC-endoderm AFBLy 3d, definitive endoderm 3d, anterior foregut, posterior foregut, midgut	Microarray (Affymetrix)		Homo sapiens	Geo
	Loh	Human induced pluripotent stem cells (iPSCs) derived from somatic cells of patients hold great promi ...	14	fibroblast, iPSC from CD34+, iPSC from PBMC, iPSC from fibroblast, H1, H9	Microarray (Affymetrix)		Homo sapiens	Geo
	Lojewski	Brain perivascular cells have recently been identified as a novel mesodermal cell type in the human ...	16	MSC, hippocampus stromal cell, subcortex stromal cell, Neural explant hippocampus, Neural explant white matter, neurosphere	Microarray (Affymetrix)		Homo sapiens	Geo
	Ma	Microglia, the resident immune cells of the central nervous system (CNS), are thought to contribute ...	16	CD11b+ retinal microglia from 3month mouse, CD11b+ retinal microglia f ...	Microarray (Affymetrix)		Mus musculus	Geo
	Macfarlan	Embryonic stem (ES) cells are derived from blastocyst-stage embryos and are thought to be functional ...	6	mESC 2C tomato -, mESC 2C tomato +	Microarray (Affymetrix)		Mus musculus	Geo
	Mackay	Tissue-resident memory T cells (T(RM) cells) provide superior protection against infection in extral ...	24	Naïve spleen CD8 T cell, Tcm CD8 T cell, Tem CD8 T cell, Gut Trm CD8 T cell, Lung Trm CD8 T cell, Skin Trm CD8 T cell, DECT gdTcR+, DETC abTcR+	Microarray (Affymetrix)		Mus musculus	Geo
	Maherali	Direct reprogramming of human fibroblasts to a pluripotent state has been achieved through ectopic e ...	21	fibroblast, iPSC C5, iPSC C6, iPSC C8, iPSC C12, iPSC 2', ESC	Microarray (Affymetrix)		Homo sapiens	ArrayExpress, Geo
	Maier	Objective—Pericytes are critical cellular components of the microvasculature that play a major role ...	3	Pericyte	Microarray (Illumina)		Homo sapiens	Geo
	Maijenburg	Detailed understanding of mesenchymal stromal cells (MSC) migration is imperative for future cellula ...	6	MSC apical, MSC basal	Microarray (Affymetrix)		Homo sapiens	ArrayExpress, Geo
	Marchetto	L1 retrotransposons are active elements in the genome, capable of mobilization in neuronal progenito ...	21	WT dermal fibroblast, iPSC-WT, RTT dermal fibroblast, iPSC-RTT, ESC	Microarray (Affymetrix)		Homo sapiens	ArrayExpress, Geo
	Marchetto	Ectopic over-expression of specific genes has been shown to transcriptionally reprogram various type ...	15	NPC, NPC-derived iPSC, ESC HUES6, ESC Cythera	Microarray (Affymetrix)		Homo sapiens	ArrayExpress, Geo
	Marconett	Analysis of gene expression during differentiation of alveolar epithelial type 2 (AT2) cells into AT ...	17	AT2, AT2 2d, AT2 4d, AT2 6d, AT2 8d	Microarray (Illumina)		Homo sapiens	Geo
	Mariani	Autism spectrum disorder (ASD) is a disorder of brain development. Most cases lack a clear etiology ...	45	iPSC-derived neural progenitors day 0, iPSC-derived neural progenitors ...	RNASeq (Illumina)		Homo sapiens	Geo
	Markov	Phenotypic heterogeneity has been observed among mesenchymal stem/stromal cell (MSC) populations, bu ...	9	BM MSC, UCB MSC	Microarray (Affymetrix)		Homo sapiens	ArrayExpress, Geo
	Maroof	Human pluripotent stem cells are a powerful tool for modeling brain development and disease. The hum ...	12	ESC, SHH for 8d, SHH for 12d, SHH for 16d	Microarray (Illumina)		Homo sapiens	Geo
	Martinez	Analysis of alternative activation of macrophages at gene expression level. The study forms part of ...	6	Bone marrow derived macrophage, M2-polarised bone marrow derived macrophage (+IL4)	Microarray (Affymetrix)		Mus musculus	Geo
	Martins	INTRODUCTION: Standardization of mesenchymal stromal cells (MSCs) manufacturing is urgently needed ...	11	BM-MSC in FBS, UC-MSC in FBS, UC-MSC in HS, UC-MSC in hPL	Microarray (Affymetrix)		Homo sapiens	Geo
	Masaki	Induction of germline-competent pluripotent stem cells from mouse fibroblasts has been achieved by t ...	10	fibroblast, iPSC on MEF, iPSC on matrigel, iPSC mTeSR/matrigel	Microarray (Affymetrix)		Homo sapiens	Geo
	Matigian	Understanding the molecular bases of neurological and psychiatric conditions is hampered by a lack o ...	124	fibroblast of dermis, ONS	Microarray (Illumina)		Homo sapiens	ArrayExpress
	Matigian	Multipotent mesenchymal stromal cells derived from human placenta (pMSCs), and unrestricted somatic ...	12	BM-MSC, CB-MSC, placenta MSC	Microarray (Illumina)		Homo sapiens	ArrayExpress
	Mayshar	Because of their somatic cell origin, human induced pluripotent stem cells (HiPSCs) are assumed to c ...	7	ESC, fib-iPSC, BJ-TERT iPSC	Microarray (Affymetrix)		Homo sapiens	ArrayExpress, Geo
	McWeeney	In chronic-phase chronic myeloid leukemia (CML) patients, the lack of a major cytogenetic response ( ...	59	TKI-NR, TKI-R	Microarray (Affymetrix)	leukomics	Homo sapiens	Geo
	Medyouf	T cell acute lymphoblastic leukemia (T-ALL) is an aggressive cancer of immature T cells that often s ...	30	T-ALL mock, T-ALL GSI, T-ALL cMYC, T-ALL cMYC +GSI, T-ALL ICN, T-ALL ICN +GSI	Microarray (Affymetrix)	leukomics	Homo sapiens	Geo
	Menge	Mesenchymal stem cells (MSCs) may be useful for treating a variety of disease states associated with ...	16	MSC, MSC + PEC, PEC, PEC + MSC	Microarray (Affymetrix)		Homo sapiens	ArrayExpress, Geo
	Mica	Melanocytes are pigment-producing cells of neural crest origin responsible for protecting the skin a ...	58	ESC day 0, ESC-derived NCC+DSi day 1, ESC-derived NCC+DSi day 3, ESC-d ...	Microarray (Illumina)		Homo sapiens	Geo
	Mikkelsen	Somatic cells can be reprogrammed to a pluripotent state through the ectopic expression of defined t ...	32	Activated B lymphocytes, Activated B lymphocytes expressing OSKM, BIV1 ...	Microarray (Affymetrix)		Mus musculus	Geo
	Miller	Transcriptional studies suggest Alzheimer's disease (AD) involves dysfunction of many cellular pathw ...	62	CA1 F, CA1 M, CA1 AD F, CA1 AD M, CA3 F, CA3 M, CA3 AD F, CA3 AD M	Microarray (Illumina)		Homo sapiens	ArrayExpress, Geo
	Mills	The mammalian heart undergoes maturation during postnatal life to meet the increased functional requ ...	9	heart tissue, PSC-derived CO + CTRL, PSC-derived CO + MM	RNASeq (Illumina)		Homo sapiens	Geo
	Minoda	Human immune cell subsets develop in immunodeficient mice following reconstitution with human CD34+ ...	19	CD141 untreated, CD141+ polyIC, CD141+ R848, CD141+ polyIC+R848, CD1c untreated, CD1c+ polyIC, CD1c+ R848, CD1c+ polyIC+R848	Microarray (Illumina)		Homo sapiens	Geo
	Monaco	The molecular characterization of immune subsets is important for designing effective strategies to ...	127	PBMC, basophil, neutrophil, monocyte CD14+, CD14+ CD16+ monocyte, CD16 ...	RNASeq (Illumina)		Homo sapiens	Geo
	Monaco	The molecular characterization of immune subsets is important for designing effective strategies to ...	12	female PBMC, male PBMC	Microarray (Illumina)		Homo sapiens	Geo
	Mooney	We previously demonstrated that myeloid cells are the source of fibrotic tissue induced by foreign m ...	18	Peritoneal myeloid cells (unstimulated)_day 0, Peritoneal myeloid cell ...	Microarray (Illumina)		Mus musculus	Geo
	Morrison	Different strains of T. brucei induce different degrees of pathology in infected animals, and TREU92 ...	9	uninfected spleen, Spleen day10 T brucei STIB247, Spleen day10 T brucei TREU927 infection	Microarray (Affymetrix)		Mus musculus	Geo
	Morsczeck	Recently, osteogenic precursor cells were isolated from human dental follicles, which differentiate ...	6	Dental Follicle Cells (DFC), Dental Follicle Cells 4-weeks osteogenic differentiation	Microarray (Affymetrix)		Homo sapiens	Geo
	Moschidou	Induced pluripotent stem cells (iPSCs) with potential for therapeutic applications can be derived fr ...	15	AFSC T1, AFSC T2, AFSC T1 +VPA, AFSC T2 + VPA, H1 ESC, H9 ESC	Microarray (Illumina)		Homo sapiens	ArrayExpress, Geo
	Mrugala	Multipotent mesenchymal stromal cells (MSC) display a high potential for the development of novel tr ...	30	BM MSC, Day 1 BMP2, Day 3 BMP2, Day 7 BMP2, Day 21 BMP2, Day 1 TGFb3, Day 3 TGFb3, Day 7 TGFb3, Day 21 TGFb3	Microarray (Affymetrix)		Homo sapiens	ArrayExpress, Geo
	Muffat	Microglia, the only lifelong resident immune cells of the central nervous system (CNS), are highly s ...	16	MG control + basal medium, MG control + NCM medium, PSC-derived MGL + basal medium, PSC-derived MGL + NCM medium, PSC-derived NPC + basal medium	RNASeq (Illumina)		Homo sapiens	Geo
	Muguruma	During cerebellar development, the main portion of the cerebellar plate neuroepithelium gives birth ...	6	Control NPC, Fgf2 NPC	RNASeq (Illumina)		Homo sapiens	Geo
	Murakami	The endometrial perivascular microenvironment is rich in mesenchymal stem-like cells that express ty ...	8	W5C5- endometrial stromal cell, W5C5+ endometrial stromal cell	RNASeq (Illumina)		Homo sapiens	Geo
	Nayler	Pluripotent stem cells can differentiate into every cell type of the human body. Reprogramming of so ...	33	fibroblast, fibroblast ATM+/-, fibroblast ATM-/-, ESC, iPSC, iPSC ATM +/-, iPSC ATM -/-	Microarray (Illumina)		Homo sapiens	Geo
	Nayler	Ataxia-telangiectasia (A-T) is a rare genetic disorder caused by loss of function of the ataxia-tela ...	12	C11 iPSC control line, Day 34 neural differentiation C11 control line, AT30 A-T iPSC line, Day 34 neural differentiation AT30	RNASeq (Illumina)		Homo sapiens	Geo
	Ng	Refractoriness to induction chemotherapy and relapse after achievement of remission are the main obs ...	227	CD34+ CD38+ LSC-, CD34+ CD38+ LSC+, CD34+ CD38- LSC-, CD34+ CD38- LSC+, CD34- CD38+ LSC-, CD34- CD38+ LSC+, CD34- CD38- LSC-, CD34- CD38- LSC+	Microarray (Illumina)		Homo sapiens	Geo
	Nigro	In early mouse pre-implantation development, primitive endoderm (PrE) precursors are platelet-derive ...	6	ESC PECAM1- PDGFRα+, ESC PECAM1+ PDGFRα-, ESC PECAM1+ PDGFRα+	RNASeq (Illumina)		Mus musculus	Geo
	Nolan	Microvascular endothelial cells (ECs) within different tissues are endowed with distinct but as yet ...	51	brain EC, muscle EC, glomerulus EC, testis EC, heart EC, lung EC, sple ...	Microarray (Affymetrix)		Mus musculus	Geo
	Nolan	Microvascular endothelial cells (ECs) within different tissues are endowed with distinct but as yet ...	6	ESC-derived CXCR4+ EC, ESC-derived CD133+ EC	Microarray (Affymetrix)		Homo sapiens	Geo
	Notta	In a classical view of hematopoiesis, the various blood cell lineages arise via a hierarchical schem ...	24	HSC, MPP_71-BAH-, MPP_71+, MPP_71+BAH+, CMP_71-BAH-, CMP_71+, CMP_71+_BAH+, MEP_71-BAH-, MEP_71+, MEP_71+BAH+, MLP, GMP	RNASeq (Illumina)		Homo sapiens	Geo
	Novershtern	Haematopoiesis the generation of blood provides the archetype model for hierarchical differentiati ...	211	basophil, naive B cell, mature B class able to switch, mature B cell, ...	Microarray (Affymetrix)	leukomics	Homo sapiens	ArrayExpress, Geo
	O'Carroll	LPS tolerance is an essential immune-homeostatic response to repeated exposure to LPS that prevents ...	12	Untreated macrophage, Macrophage acute response to LPS, Macrophage LPS Tolerance, Macrophage Recovery from tolerance	Microarray (Agilent)		Mus musculus	Geo
	O'Malley	The generation of induced pluripotent stem (iPS) cells presents a challenge to normal developmental ...	25	MEF, Gate 1 GFP-, Gate 1 GFP+, Gate 2 GFP-, Gate 2 GFP+, Gate 3 GFP-, Gate 3 GFP+, Gate 3 GFP+ Day 15, iPS, ESC	RNASeq (Illumina)		Mus musculus	ArrayExpress
	Ockenhouse	Using genome-wide expression profiles from persons either experimentally challenged with malaria-inf ...	71	malaria-naïve PBMC, experimental malaria, acute Cameroon, treated malaria-Cameroon	Microarray (Affymetrix)		Homo sapiens	Geo
	Ohi	Human induced pluripotent stem (iPS) cells are remarkably similar to embryonic stem (ES) cells, but ...	24	fibroblast, melanocyte, hepatocyte, EB, iPSC, hep-derived iPSC, mel-derived iPSC, ESC	Microarray (Affymetrix)		Homo sapiens	ArrayExpress, Geo
	Ovchnnikov	Early-onset Alzheimer disease (AD)-like pathology in Down syndrome is commonly attributed to an incr ...	34	Euploid 45d, APP-CRISPR 45d, DS 45d, Euploid 65d, APP-CRISPR 65d, DS 65d	Microarray (Illumina)		Homo sapiens	Geo
	Page	The complex anatomy of the epidermis contains multiple adult stem cell populations, but the extent t ...	6	Lrig1 GFP- interfollicular epidermal cells, Lrig1 GFP+ epidermal stem cells	Microarray (Illumina)		Mus musculus	ArrayExpress
	Paige	Directed differentiation of human embryonic stem cells (ESCs) into cardiovascular cells provides a m ...	10	ESC 0d, Day 2 cardiac differentiation, Day 5 cardiac differentiation, Day 9 cardiac differentiation, Day 14 cardiac differentiation	Microarray (Affymetrix)		Homo sapiens	Geo
	Palpant	We analyzed chromatin dynamics and transcriptional activity of human embryonic stem cell (hESC)-deri ...	6	cardiogenic mesoderm-derived EC, hemogenic mesoderm-derived EC, mesoderm-derived CP	RNASeq (Illumina)		Homo sapiens	Geo
	Pandya	Microglia are the resident inflammatory cells of the central nervous system (CNS) and have important ...	24	iPSC, iPSC-derived microglia, neonatal microglia, adult microglia, DC, NSC, BM macrophage, peritoneal macrophage	Microarray (Affymetrix)		Mus musculus	Geo
	Pandya	Microglia are the resident inflammatory cells of the central nervous system (CNS) and have important ...	21	iPSC, iPSC-derived MG, MG, DC, macrophage	Microarray (Affymetrix)		Homo sapiens	Geo
	Pang	In the human hematopoietic system, aging is associated with decreased bone marrow cellularity, decre ...	27	young HSC, middle-aged HSC, old HSC	Microarray (Affymetrix)	leukomics	Homo sapiens	Geo
	Papadimitropoulos	Mesenchymal stromal/stem cell (MSC) expansion in conventional monolayer culture on plastic dishes (2 ...	10	2D culture, 3D culture	Microarray (Affymetrix)		Homo sapiens	Geo
	Paquet-Fifield	The cellular and molecular microenvironment of epithelial stem and progenitor cells is poorly charac ...	8	HD1-hi, HD1-lo	Microarray (Affymetrix)		Homo sapiens	Geo
	Park	The generation of vascular progenitors (VPs) from human induced pluripotent stem cells (hiPSCs) has ...	27	ESC, ESC-derived EP, iPSC-derived EP, EC_capillary, EC_umbilical vein, CD34+ CB, fibroblast	Microarray (Illumina)		Homo sapiens	Geo
	Park	A balance between Six2-dependent self-renewal and canonical Wnt signaling-directed commitment regula ...	21	FACS, Dispersed with DMSO, Aggregate with DMSO, Dispersed with BIO 24 ...	Microarray (Affymetrix)		Mus musculus	ArrayExpress, Geo
	Park	Pluripotency pertains to the cells of early embryos that can generate all of the tissues in the orga ...	16	fibroblast, ES-derived fibroblast, iPSC, ESC	Microarray (Affymetrix)		Homo sapiens	Geo
	Park	In this study, we established and characterized human umbilical cord blood-derived mesenchymal stem ...	12	MSC&nbsp;CD325lo, MSC CD325-hi, MSC CD325lo + MI, MSC CD325hi + MI	Microarray (Affymetrix)		Homo sapiens	ArrayExpress, Geo
	Park	A balance between Six2-dependent self-renewal and canonical Wnt signaling-directed commitment regula ...	12	beta-catenin vs IgG mock control, beta-catenin vs DNA control, Six2 vs DNA control, Six2 vs IgG control	ChIPSeq (Illumina)		Mus musculus	Geo
	Patel	Applications of embryonic stem cells (ESCs) require faithful chromatin changes during differentiatio ...	41	fibroblast, XiXa ESC, UCLA9_XaXa ESC, XaXe ESC, male ESC, ESC-derived cardiomyocyte	RNASeq (Illumina)		Homo sapiens	Geo
	Patel	The term placenta is a highly vascularized tissue and is usually discarded upon birth. Our objective ...	7	CB-EP, Placental EP	Microarray (Illumina)		Homo sapiens	ArrayExpress
	Paul	Successful implantation and long-term survival of engineered tissue grafts hinges on adequate vascul ...	8	BM MSC Clone 5, BM MSC Clone 27, Clone 5 +EC lo-angiogenesis, Clone 27 +EC hi-angiogenesis	Microarray (Illumina)		Homo sapiens	Geo
	Pelekanos	Adult stem cells are thought to reside in most tissues of the body, and contribute to homeostatic ma ...	12	Bone-marrow MSC, Cardiac CFU-f, Kidney CFU-f	Microarray (Illumina)		Mus musculus	Geo
	Peng	Gastrulation of the mouse embryo entails progressive restriction of lineage potency and the organiza ...	118	section 1 position A, section 1 position P, section 2 position A, sect ...	RNASeq (Illumina)		Mus musculus	Geo
	Petropoulos	Mouse studies have been instrumental in forming our current understanding of early cell-lineage deci ...	1529	E3, E4, E4-Late, E5-Early, E5, E6, E7	Single Cell RNASeq (Illumina)		Homo sapiens	ArrayExpress
	Petrova	Cornification and epidermal barrier defects are associated with a number of clinically diverse skin ...	23	ESC, iPSC, ESC-keratinocyte, iPSC-keratinocyte, keratinocyte, fibroblast	Microarray (Illumina)		Homo sapiens	Geo
	Pinto	Cardiac tissue macrophages (cTMs) are a previously uncharacterised cell type that we have identified ...	9	CD45+CD11b+GFP+ (Brain), CD45+CD11b+GFP+ (Heart), CD45+CD11b+GFP+ (Spleen)	Microarray (Affymetrix)		Mus musculus	ArrayExpress
	Pinto	Cardiac tissue macrophages (cTMs) are abundant in the murine heart but the extent to which the cTM p ...	6	Cx3cr1-GFP+ CTM, Cx3cr1-GFP_hi CTM	Microarray (Agilent)		Mus musculus	ArrayExpress
	Polanco	Human induced pluripotent stem cells (hiPSC) have the potential to generate healthy cells and tissue ...	24	iPSC GCTM2 (neg) CD9 (neg), iPSC GCTM2 (low) CD9 (low), iPSC GCTM2 (mid) CD9 (mid), iPSC GCTM2 (high) CD9 (high)	Microarray (Illumina)		Homo sapiens	Geo
	Polo	Induced pluripotent stem cells (iPSCs) have been derived from various somatic cell populations throu ...	12	granulocyte-derived iPSC, B cell-derived iPSC, Tail tip fibroblast-derived iPSC, skeletal muscle precursor-derived iPSC	Microarray (Affymetrix)		Mus musculus	ArrayExpress, Geo
	Polo	Induced pluripotent stem cells (iPSCs) have been derived from various somatic cell populations throu ...	12	miPSC tail tip fibroblast derived, miPSC granulocyte derived, miPSC T-cell derived, miPSC B-cell derived	Microarray (Affymetrix)		Mus musculus	Geo
	Poon	Human (h) embryonic stem cells (ESC) represent an unlimited source of cardiomyocytes (CMs); however, ...	10	ESC, ESC-CM, FVCM, AVCM	Microarray (Illumina)		Homo sapiens	Geo
	Pratt	OBJECTIVE: We sought clinically relevant predictive biomarkers present in CD4 T-cells, or in serum, ...	173	OA, ACPA- RA, ACPA+ RA, Inflammatory arthritis Non-RA	Microarray (Illumina)		Homo sapiens	ArrayExpress, Geo
	Qin	Pluripotent stem cells are derived from culture of early embryos or the germline and can be induced ...	34	ICM E3.5, ES, EG E12.5, PGC E11.5, PGC E13.5, SGM E11.5, MEF E13.5, NSC 8 week, HSC 8 week	Microarray (Affymetrix)		Mus musculus	ArrayExpress, Geo
	Quaife-Ryan	BACKGROUND: The inability of the adult mammalian heart to regenerate following injury represents a m ...	64	fibroblast sham neonate, fibroblast neonate MI, fibroblast 8w sham, fi ...	RNASeq (Illumina)		Mus musculus	Geo
	Rajaram	Many fibroblast-secreted proteins promote tumorigenicity, and several factors secreted by cancer cel ...	80	foreskin fibroblast, FF + Cal51, FF + MDAMB231, HFF1, HFF1 + Cal51, HF ...	Microarray (Affymetrix)		Homo sapiens	Geo
	Rakar	Autologous cell-based therapies promise important developments for reconstructive surgery. In vitro ...	14	Adipocyte, Fibroblast at 28D adipogenic medium, Primary articular chon ...	Microarray (Affymetrix)		Homo sapiens	ArrayExpress, Geo
	Rapin	Gene expression profiling has been used extensively to characterize cancer, identify novel subtypes, ...	34	HSC, MPP, CMP, GMP, MEP, Early PM, Late PM, MY, MM, BC, PMN	Microarray (Affymetrix)		Homo sapiens	ArrayExpress, Geo
	Raspopovic	During limb development, digits emerge from the undifferentiated mesenchymal tissue that constitutes ...	5	Forelimb autopod Sox9+, Forelimb autopod Sox9-	Microarray (Agilent)		Mus musculus	Geo
	Reid	Human pluripotent stem cells (hPSCs) generate hematopoietic progenitor cells (HPCs) but fail to engr ...	10	HPC, ESC-hemogenic endothelium, ESC-derived HPC CXCR4.GFP-, ESC-derived HPC CXCR4.GFP+	Microarray (Affymetrix)		Homo sapiens	Geo
	Reid	Human pluripotent stem cells (hPSCs) generate hematopoietic progenitor cells (HPCs) but fail to engr ...	5	mobilised HPC, ESC-HPC	Microarray (Affymetrix)		Homo sapiens	Geo
	Reinisch	In the last decade there has been a rapid expansion in clinical trials using mesenchymal stromal cel ...	11	BM MSC, WAT MSC, UC MSC, Dermal MSC	Microarray (Affymetrix)		Homo sapiens	Geo
	Renoux	Natural killer (NK) cells are cytotoxic lymphocytes and play a vital role in controlling viral infec ...	15	LMPP, CLP, NKP, NK	Microarray (Affymetrix)		Homo sapiens	Geo
	Reynders	Cutaneous C-unmyelinated MRGPRD+ free nerve endings and C-LTMRs innervating hair follicles convey tw ...	6	Mrgprd+ sensory neurons, C-LTMR sensory neurons, Heterogeneous DRG neurons	RNASeq (Illumina)		Mus musculus	Geo
	Reynier	Lipopolysaccharide (LPS) is ubiquitous in the environment. Inhalation of LPS has been implicated in ...	14	alveolar macrophage + saline 6hr, alveolar macrophage + LPS 6hr	Microarray (Affymetrix)		Homo sapiens	Geo
	Rinkevich	Dermal fibroblasts represent a heterogeneous population of cells with diverse features that remain l ...	18	EPF, ENF, Cranial fibroblast, Dorsal fibroblast, Oral mucosal fibroblast, ventral dermal fibroblast	Microarray (Affymetrix)		Mus musculus	Geo
	Roobrouck	Several adherent postnatal stem cells have been described with different phenotypic and functional p ...	31	MSC, MSC in MAPC media, MAPC, MAPC in MSC media, MAPC in Mab media, Mab, Mab in MAPC media, H9	Microarray (Agilent)		Homo sapiens	Geo
	Rossi	Loss of immune function and an increased incidence of myeloid leukemia are two of the most clinicall ...	8	LT-HSC young animal, LT-HSC Aged animal	Microarray (Affymetrix)		Mus musculus	Geo
	Royer-Pokora	Wilms tumors (WTs) are genetically heterogeneous kidney tumors whose cells of origin are unknown. Tu ...	29	WT1 CTNNB1 line 1, WT1 CTNNB1 line 2, WT1 CTNNB1 line 4, WT1 line 3, WT1 line 5, CLS1, MSC	Microarray (Agilent)		Homo sapiens	Geo
	Ruiz	Generation of human induced pluripotent stem cells (hiPSCs) by the expression of specific transcript ...	18	ESC, iPSC(S4F1), iPSC(S4F3), ESC-endoderm, iPSC(S4F1)-endoderm, iPSC(S ...	Microarray (Affymetrix)		Homo sapiens	Geo
	Ryan	Early fetal and placental MSCs have translationally-advantageous characteristics compared to later p ...	45	BM MSC 8wk, BM MSC 9wk, BM MSC 10wk, BM MSC 11wk, BM MSC 12wk, CM MSC ...	Microarray (Illumina)		Homo sapiens	ArrayExpress
	Ryota	Adipogenesis is the process of cell differentiation by which mesenchymal stem cells (MSC) become adi ...	30	MSC, MSC adipogenic 1h, MSC adipogenic 12h, MSC adipogenic 24h, MSC ad ...	Microarray (Illumina)		Homo sapiens	ArrayExpress, Geo
	Sa	IL-19, IL-20, IL-22, IL-24, and IL-26 are members of the IL-10 family of cytokines that have been sh ...	25	keratinocyte, IL1b-treated keratinocyte, IL19-treated keratinocyte, IL ...	Microarray (Affymetrix)		Homo sapiens	Geo
	Sahakyan	Naive human embryonic stem cells (hESCs) can be derived from primed hESCs or directly from blastocys ...	14	Primed ESC XaXe, 5iLAF XaXa_XIST+, 5iLAF XaXi_XIST+, 5iLAF XaXa_XIST-, reprimed Xa_XIST-	RNASeq (Illumina)		Homo sapiens	Geo
	Saito	BACKGROUND: Human iPS cells (hiPSCs) have attracted considerable attention for applications to drug ...	51	AM, MRC5, PAE, UtE, AM-iPSC, MRC_iPSC, PAE-iPSC, UtE-iPSC	Microarray (Agilent)		Homo sapiens	Geo
	Sakamoto	Trehalose 6,6'-dimycolate (TDM) is a cell wall glycolipid and an important virulence factor of mycob ...	12	2hr PG control, 2hr TDM bead treated, 24hr PG bead control, 24hr TDM bead treated	Microarray (Affymetrix)		Mus musculus	ArrayExpress
	Salomonis	The role of alternative splicing in self-renewal, pluripotency and tissue lineage specification of h ...	6	ESC, ESC - derived CP	Microarray (Affymetrix)		Homo sapiens	ArrayExpress, Geo
	Sarkar	Sox2 expression marks gastric stem and progenitor cells, raising important questions regarding the g ...	6	Sox2 Wild Type Stomach, Sox2 Knock Out Stomach	RNASeq (Illumina)		Mus musculus	Geo
	Sathiyanathan	BACKGROUND: Development of primary open-angle glaucoma (POAG) is associated with the malfunctioning ...	12	cornea, sclera, TM, TM MSC	Microarray (Illumina)		Homo sapiens	Geo
	Schellenberg	Matrix elasticity guides differentiation of mesenchymal stem cells (MSCs) but it is unclear if these ...	9	MSC tissue culture plastic, MSC 1.5kPa PDMS, MSC 50kPa PDMS	Microarray (Affymetrix)		Homo sapiens	Geo
	Scott	A major obstacle to curing chronic myeloid leukemia (CML) is residual disease maintained by tyrosine ...	48	CML HSC, CML HSC 8h dasatinib, CML HSC 8h imatinib, CML HSC 8h nilotin ...	Microarray (Affymetrix)	leukomics	Homo sapiens	ArrayExpress
	Scott	A major obstacle to curing chronic myeloid leukemia (CML) is residual disease maintained by tyrosine ...	24	CD34+ CD38- HSC, CML CD34+ CD38-, CD34+ CD38+ HSP, CML CD34+ CD38+	Microarray (Affymetrix)	leukomics	Homo sapiens	ArrayExpress
	Scotton	Uncontrolled activation of the coagulation cascade contributes to the pathophysiology of several con ...	6	Control lung, Fibrotic lung	Microarray (Affymetrix)		Mus musculus	Geo
	Segura	Dendritic cells (DCs) are critical regulators of immune responses. Under noninflammatory conditions, ...	20	CD14dim CD16- Mo, CD14+CD16- Mo, TAM, BDCA1+ DC, Ascites CD1c	Microarray (Affymetrix)		Homo sapiens	ArrayExpress, Geo
	Sharff	Pluripotent mesenchymal stem cells (MSCs) are bone marrow stromal progenitor cells that can differen ...	6	MSC_C3H10T1/2 + GFP, MSC_C3H10T1/2 + BMP9	Microarray (Affymetrix)		Mus musculus	ArrayExpress, Geo
	Shinagawa	Expression of Oct3/4, Sox2, Klf4, and c-Myc (OSKM) can reprogram somatic cells into induced pluripot ...	21	ESC, iPSC_OSKM, iPSC_KOBAN, MEF, MEF_OSKM, MEF_OSKM+BAN, MEF-TH2A/Bnull_OSKM	Microarray (Affymetrix)		Mus musculus	ArrayExpress, Geo
	Si-Tayeb	There exists a worldwide shortage of donor livers available for orthotropic liver transplantation an ...	15	ESC, iPSC, ESC-derived hepatocyte, iPSC-derived hepatocyte, fibroblast	Microarray (Affymetrix)		Homo sapiens	ArrayExpress, Geo
	Sinclair	Stromal support is critical for lung homeostasis and the maintenance of an effective epithelial barr ...	36	LT-MSCs, BAL-MSCs	Microarray (Illumina)		Homo sapiens	Geo
	Sinkkonen	Loss of microRNA (miRNA) pathway components negatively affects differentiation of embryonic stem (ES ...	6	mESC Dicer -/- (27H), mESC Dicer +/- (D4)	Microarray (Affymetrix)		Mus musculus	ArrayExpress, Geo
	Sjöstrand	Tripartite-motif 21 (TRIM21) is an E3 ubiquitin ligase that regulates innate immune responses by ubi ...	27	control PBMC donor, PBMC Sjogrens donor	Microarray (Affymetrix)		Homo sapiens	Geo
	Smallie	Dual-specificity phosphatase (DUSP) 1 dephosphorylates and inactivates members of the MAPK superfami ...	36	C57BL6 BMM, C57BL6 BMM + LPS 1hour, C57BL6 BMM + LPS 4hours, Dusp1-nul ...	Microarray (Agilent)		Mus musculus	Geo
	Soderholm	Streptococcus pyogenes (Group A Streptococcus; GAS) commonly causes pharyngitis in children and adul ...	12	Mock TEpi, JRS4 TEpi, 5448 TEpi	RNASeq (Illumina)		Homo sapiens	Geo
	Soh	Coronary arteriogenesis is a central step in cardiogenesis, requiring coordinated generation and int ...	18	left atrium fetal heart, right atrium fetal heart, left ventricle feta ...	Microarray (Illumina)		Homo sapiens	Geo
	Soldner	Patient-specific induced pluripotent stem cells (iPSCs) derived from somatic cells provide a unique ...	12	BGO1, WIBR3, PD-iPSC SNCA_corrected, BGO1 SNCA_A53T, WIBR3 SCNA_A53T, PD-iPSC SNCA_A53T	Microarray (Affymetrix)		Homo sapiens	ArrayExpress, Geo
	Soldner	Induced pluripotent stem cells (iPSCs) derived from somatic cells of patients represent a powerful t ...	11	PD fibroblast, PD iPSC-OSK, PD iPSC-FF, ESC	Microarray (Affymetrix)		Homo sapiens	Geo
	Spence	The authors demonstrate directed differentiation of human PSCs (hESCs and iPSCs) into intestinal tis ...	23	ESC, iPSC line 3.5, iPSC line 3.6, iPSC line 3.12, ESC-endoderm Day 3, ...	Microarray (Affymetrix)		Homo sapiens	ArrayExpress, Geo
	Spitzer	Human endometrium regenerates on a cyclic basis from candidate stem/progenitors whose genetic progra ...	15	endometrial interval phase, endometrial proliferative phase, endometri ...	Microarray (Affymetrix)		Homo sapiens	ArrayExpress, Geo
	Stadtfeld	The generation of induced pluripotent stem cells (iPSCs) often results in aberrant epigenetic silenc ...	8	iPSC, iPSC +ascorbate	Microarray (Affymetrix)		Mus musculus	ArrayExpress, Geo
	Stein	In vitro neural stem cell models are widely used to model a wide range of neuropsychiatric condition ...	105	NPC week 1, NPC week 4, NPC week 8, NPC week 12, iPSC, iPSC neural dif ...	Microarray (Illumina)		Homo sapiens	ArrayExpress, Geo
	Strunnikova	Retinal pigment epithelium (RPE) is a polarized cell layer critical for photoreceptor function and s ...	30	RPE, fetal RPE, primary RPE, primary fetal RPE, Adult choroid	Microarray (Affymetrix)		Homo sapiens	ArrayExpress, Geo
	Stünkel	BACKGROUND: Babies born at lower gestational ages or smaller birthweights have a greater risk of po ...	38	F heavy, M heavy, F, M, UBT F, UBT M, UBT F light, UBT M light	Microarray (Agilent)		Homo sapiens	Geo
	Sukarieh	Are molecular pathways reflecting the biology of small for gestational age (SGA) neonates preserved ...	24	MSC untreated, MSC + insulin 10min, MSC + insulin 0.5h, MSC + insulin ...	Microarray (Illumina)		Homo sapiens	ArrayExpress, Geo
	Sukarieh	Are molecular pathways reflecting the biology of small for gestational age (SGA) neonates preserved ...	24	MSC, MSC + insulin 10min, MSC + insulin 30min, MSC + insulin 1h, MSC + ...	Microarray (Illumina)		Homo sapiens	ArrayExpress, Geo
	Sukarieh	Are molecular pathways reflecting the biology of small for gestational age (SGA) neonates preserved ...	12	MSC untreated, MSC + insulin 10min, MSC + insulin 60min, MSC_SGA untreated, MSC_SGA +insulin 10min, MSC_SGA +insulin 60min	Microarray (Illumina)		Homo sapiens	ArrayExpress, Geo
	Sukarieh	Are molecular pathways reflecting the biology of small for gestational age (SGA) neonates preserved ...	8	MSC, MSC small neonate	Microarray (Illumina)		Homo sapiens	ArrayExpress, Geo
	Suzuki	Transplantation of mesenchymal stem cells (MSCs) derived from synovium is a promising therapy for ca ...	6	MSC monolayer, MSC aggregate	Microarray (Affymetrix)		Homo sapiens	Geo
	Swindell	The clinical features of psoriasis, characterized by sharply demarcated scaly erythematous plaques, ...	24	keratinocyte, IFNa, IFNg, IL4, IL13, IL17A, TNF	Microarray (Affymetrix)		Homo sapiens	Geo
	Sworder	Bone marrow stromal cells (BMSCs, also known as bone marrow-derived mesenchymal stem cells) are fibr ...	14	MSC-multipotent, MSC-bone forming, MSC-fibrous	Microarray (Affymetrix)		Homo sapiens	ArrayExpress, Geo
	Synnergren	Recent studies have shown that microRNAs (miRNAs) act as posttranscriptional regulators and that the ...	15	ESC, cardiomyocyte cluster 3wk, cardiomyocyte cluster 7wk, foetal heart, adult heart	Microarray (Affymetrix)		Homo sapiens	ArrayExpress
	Synnergren	It is now well documented that human embryonic stem cells (hESCs) can differentiate into functional ...	15	ESC, ESC-derived CM 3wk, ESC-derived CM 7wk, fetal heart, adult heart	Microarray (Affymetrix)		Homo sapiens	ArrayExpress
	Szabo	As is the case for embryo-derived stem cells, application of reprogrammed human induced pluripotent ...	8	Day 0 adult dermal fibroblasts, Day 4 Oct-4 transduced fibroblasts, Day 21 CD45+, Day 37 CD45+	Microarray (Affymetrix)		Homo sapiens	ArrayExpress, Geo
	Szulzewsky	Malignant glioma belong to the most aggressive neoplasms in humans with no successful treatment avai ...	6	Naïve control microglia, GBM associated microglia	Microarray (Affymetrix)		Mus musculus	ArrayExpress
	Tailleux	Background Transcriptional profiling using microarrays provides a unique opportunity to decipher hos ...	72	DC 0hr, DC 4hr MTB, DC 18hr MTB, DC 48hr MTB, MDM, MDM 4hr MTB, MDM 18hr MTB, MDM 48hr MTB	Microarray (Affymetrix)		Homo sapiens	ArrayExpress
	Takahashi	During mammalian embryonic development, the primitive streak initiates the differentiation of plurip ...	169	brain, NPC, adrenal gland, pancreas, salivary gland, thyroid, ovary, p ...	Microarray (Agilent)		Homo sapiens	Geo
	Takasato	The human kidney contains up to 2 million epithelial nephrons responsible for blood filtration. Rege ...	12	iPSC - derived kidney day 0, iPSC - derived kidney day 3, iPSC - derived kidney day 11, iPSC - derived kidney day 18	RNASeq (Illumina)		Homo sapiens	Geo
	Takata	Tissue macrophages arise during embryogenesis from yolk-sac (YS) progenitors that give rise to primi ...	24	iPSC-derived macrophage day 0, iPSC-derived macrophage day 3, iPSC-der ...	RNASeq (Illumina)		Mus musculus	Geo
	Tako	The immune system has numerous mechanisms that it can use to combat pathogens and eliminate infectio ...	8	Duodenum uninfected, Duodenum infected G.duodenalis	Microarray (Affymetrix)		Mus musculus	Geo
	Tan	To date, the molecular signalling mechanisms which regulate growth factors-induced MSCs tenogenic di ...	24	MSC control, MSC + GDF5 day 4, MSC + GDF5 day 10, tenocyte	Microarray (Affymetrix)		Homo sapiens	Geo
	Tanabe	Human mesenchymal stem cells (hMSCs) are multipotent cells that differentiate into several cell type ...	30	MSC early passage, MSC mid passage, MSC late passage	Microarray (Affymetrix)		Homo sapiens	Geo
	Tanaka	Chronic infantile neurologic cutaneous and articular (CINCA) syndrome is an IL-1-driven autoinflamma ...	15	fibroblast, ESC, macrophage, iMac, iMac CINA-WT, CINCA iMac	Microarray (Agilent)		Homo sapiens	Geo
	Tanaka	In obesity, a paracrine loop between adipocytes and macrophages augments chronic inflammation of adi ...	11	WT plus vehicle, WT plus TDM, Mincle KO plus vehicle, Mincle KO plus TDM	Microarray (Affymetrix)		Mus musculus	ArrayExpress, Geo
	Tasnim	Liver macrophages, Kupffer cells (KCs), play a critical role in drug-induced liver injury (DILI) and ...	9	iMAC, iKC, KC	Microarray (Affymetrix)		Homo sapiens	Geo
	Taube	The epithelial-to-mesenchymal transition (EMT) produces cancer cells that are invasive, migratory, a ...	21	HMLE + shGFP, HMLE + pWZL, HMLE + shEcad, HMLE + TGFb1, HMLE + Twist, HMLE + Gsc, HMLE + Snail	Microarray (Affymetrix)		Homo sapiens	Geo
	Tedesco	Mesoangioblasts are stem/progenitor cells derived from a subset of pericytes expressing alkaline pho ...	9	mesoangioblast, Muscular Dystrophy iPSC differentiated to mesangioblast, iPSC differentiated to mesangioblast	Microarray (Affymetrix)		Homo sapiens	Geo
	Teles	Type I interferons (IFN-α and IFN-β) are important for protection against many viral infections, whe ...	8	monocyte, monocyte + IL10	Microarray (Affymetrix)		Homo sapiens	Geo
	Teo	Understanding the molecular mechanisms controlling early cell fate decisions in mammals is a major o ...	20	ESC, 1d ESC-EPC, 2d ESC-EPC, 3d ESC-EPC	Microarray (Illumina)		Homo sapiens	ArrayExpress
	Theunissen	Recent studies have aimed to convert cultured human pluripotent cells to a naive state, but it remai ...	20	PSC, NHSM, 2iL_Dox, 4iLAF, 5iLAF	RNASeq (Illumina)		Homo sapiens	Geo
	Thion	Microglia are embryonically seeded macrophages that contribute to brain development, homeostasis, an ...	10	microglia week 14, microglia week 15, microglia week 16, microglia week 20+	Microarray (Illumina)		Homo sapiens	Geo
	Thoma	Direct transdifferentiation of somatic cells is a promising approach to obtain patient-specific cell ...	17	fibroblast, intermediate NC 7d, intermediate NC 11d, intermediate NC 18d, iSchwann cell 39d, schwann cell	Microarray (Affymetrix)		Homo sapiens	Geo
	Thomson	ES cells can be directed to differentiate towards different lineages through alteration of culturing ...	5	ESC, ESC N2B27 media	Microarray (Illumina)		Mus musculus	ArrayExpress
	Tomaru	Transcriptional Regulatory Networks (TRNs) coordinate multiple transcription factors (TFs) in concer ...	54	untreated MSC, MSC adipogenic diff 0.5hr, MSC adipogenic diff 1hr, M ...	Microarray (Illumina)		Homo sapiens	Geo
	Tonge	Pluripotency is defined by the ability of a cell to differentiate to the derivatives of all the thr ...	32	MEF, F-class iPSC, F-class iPSC Day 30, C-class iPSC, ESC	Microarray (Illumina)	grandiose	Mus musculus	Geo
	Tonge	Pluripotency is defined by the ability of a cell to differentiate to the derivatives of all the thr ...	13	2°MEF, D2H, D5H, D8H, D11H, D16H, D18H, D16L, D21L, D21Ø, 2⁰iPSC, ESC, 1⁰iPSC	Microarray (Illumina)	grandiose	Mus musculus	Geo
	Tonge	Pluripotency is defined by the ability of a cell to differentiate to the derivatives of all the thr ...	6	HDACi_0h, HDACi_24h, HDACi_48h	Microarray (Illumina)	grandiose	Mus musculus	Geo
	Tonge	Pluripotency is defined by the ability of a cell to differentiate to the derivatives of all the thr ...	4	CAG-3F tet-Myc plus dox, CAG-3F tet-Myc no dox for 48h	Microarray (Illumina)	grandiose	Mus musculus	Geo
	Touboul	Generation of hepatocytes from human embryonic stem cells (hESCs) could represent an advantageous so ...	10	ESC, ES-derived endoderm	Microarray (Illumina)		Homo sapiens	ArrayExpress
	Tsai	Human embryonic stem (hES) cells have the capacities to propagate for extended periods and to differ ...	6	ESC on MEF, ESC on matrigel, ESC + FGF2 ActivinA	Microarray (Affymetrix)		Homo sapiens	ArrayExpress, Geo
	Tsakiridis	During gastrulation, epiblast cells are pluripotent and their fate is thought to be constrained prin ...	9	dsRed+, dsRed-, CHIRON_48h	Microarray (Illumina)		Mus musculus	ArrayExpress, Geo
	Tsuboi	Objective: To compare gene expression in labial salivary glands (LSG) of IgG4-related disease (IgG4- ...	13	LSG healthy control, LSG Sjogren's syndrome, LSG IgG4-related disease	Microarray (Affymetrix)		Homo sapiens	Geo
	Ullah	Reprogramming is a new wave in cellular therapies to achieve the vital goals of regenerative medicin ...	12	MSC, MSC-derived adipocyte, dedifferentiation Day 7, dedifferentiation Day 35	Microarray (Affymetrix)		Homo sapiens	Geo
	Ulloa-Montoya	We compare the transcriptome of embryonic stem cells (ESCs), adult stem cells with apparent greater ...	15	MSC, MAPC clone 1, MAPC clone 2, MAPC clone 3, ESC	Microarray (Affymetrix)		Mus musculus	ArrayExpress, Geo
	Umeda	Here we report the successful generation and long-term expansion of SOX9-expressing CD271(+)PDGFRα(+ ...	9	ESC-derived NCC-like in FGF2, ESC-derived NCC-like in FGF2+SB431542, ESC-derived NCC-like switched from FGF2+SB431542 to FGF2	RNASeq (Illumina)		Homo sapiens	Geo
	Valk	In patients with acute myeloid leukemia (AML) a combination of methods must be used to classify the ...	293	CD34+ HPC, BMMC, AML FAB-ND, AML FAB-M0, AML FAB-M1, AML FAB-M2, AML FAB-M3, AML FAB-M4, AML FAB-M5, AML FAB-M6	Microarray (Affymetrix)		Homo sapiens	Geo
	Vallier	Human embryonic stem cells have unique value for regenerative medicine, as they are capable of diffe ...	16	ESC, ESC in CDM, ESC-BMP4+, ESC-mesendoderm, ESC-BMP4i	Microarray (Affymetrix)		Homo sapiens	ArrayExpress
	Vallier	The pluripotent status of embryonic stem cells (ESCs) confers upon them the capacity to differentiat ...	6	ESC, ESC + FGF2 + SB431542	Microarray (Affymetrix)		Homo sapiens	ArrayExpress
	van-de-Leemput	Many neurological and psychiatric disorders affect the cerebral cortex, and a clearer understanding ...	44	hESC neural differentiationday 0, hESC neural differentiationday 7, hE ...	RNASeq (Illumina)		Homo sapiens	Geo
	van-den-Berg	Differentiated derivatives of human pluripotent stem cells (hPSCs) are often considered immature bec ...	20	Tri1 atrium, Tri2 atrium, Tri3 atrium, Tri1 ventricle, Tri2 ventricle, Tri3 ventricle, adult heart, universal ref	Microarray (Illumina)		Homo sapiens	Geo
	van-Gool	We used human fetal bone marrow-derived mesenchymal stromal cells (hfMSCs) differentiating towards c ...	10	MSC, MSC-derived chondrocyte week 1, MSC-derived chondrocyte week 2, M ...	Microarray (Affymetrix)		Homo sapiens	ArrayExpress, Geo
	Vassena	The events regulating human preimplantation development are still largely unknown owing to a scarcit ...	24	metaphase II oocyte, 2-cell embryo, 4-cell embryo, 6-cell embryo, 8 to 10-cell stage embryo, morula, blastocyst, ESC	Microarray (Affymetrix)		Homo sapiens	Geo
	Verheijden	The functional diversity and molecular adaptations of reactive microglia in the chronically inflamed ...	8	WT CD45dim CD11b+ microglia, MFP2KO CD45dim CD11b+ microglia	Microarray (Affymetrix)		Mus musculus	Geo
	Vitale	In the field of disease modelling, induced pluripotent stem cells (iPSC) have become an appealing ch ...	29	fibroblast, fibroblast_sz donor, ESC, iPSC, iPSC-SZ	Microarray (Illumina)		Homo sapiens	ArrayExpress
	von-der-Heide	The contribution of molecular alterations in bone marrow mesenchymal stromal cells (BM-MSC) to the p ...	23	MSC female, MSC male, AML MSC female, AML MSC male	Microarray (Affymetrix)		Homo sapiens	Geo
	Wagner	BACKGROUND: DNA methylation plays an essential role in the regulation of gene expression. While its ...	64	female, male	Microarray (Illumina)		Homo sapiens	ArrayExpress, Geo
	Walenda	Transforming growth factor-beta 1 (TGF-β1) stimulates a broad range of effects which are cell type d ...	24	MSC early passage, MSC TGFB 1h, MSC TGFB 4h, MSC TGFB12h, MSC late pas ...	Microarray (Affymetrix)		Homo sapiens	Geo
	Wamstad	Heart development is exquisitely sensitive to the precise temporal regulation of thousands of genes ...	8	ESC, ESC-derived mesoderm, ESC-derived CP, ESC-derived CM	RNASeq (Illumina)		Mus musculus
	Wang	Triggering receptor expressed on myeloid cells 2 (TREM2) is a microglial surface receptor that trigg ...	20	Nontransgenic microglia, Trem2-/- microglia, 5XFAD transgenic microglia, Trem2-/-5XFAD microglia	Microarray (Affymetrix)		Mus musculus	Geo
	Wang	Endodermal stem/progenitor cells have diverse potential applications in research and regenerative me ...	13	epithelium, iEPC, ESC-derived endoderm, myofibroblast	Microarray (Illumina)		Homo sapiens	Geo
	Wang	Human embryonic stem cells (hESCs) can provide insights into development of inaccessible human tissu ...	9	ESC, SOX17+ endoderm, activin induction, SOX17+ endoderm FGF10 KAAD-cyclopamine induction	Microarray (Affymetrix)		Homo sapiens	ArrayExpress, Geo
	Warren	Clinical application of induced pluripotent stem (iPS) cells is limited by the low efficiency of iPS ...	28	BJ fibroblast, ESC-derived fibroblast, ESC, iPSC-viral BJ, iPSC-viral dH1F, iPSC-RNA dH1F, iPSC-RNA BJ, iPSC-RNA CF, iPSC-RNA MCR5	Microarray (Affymetrix)		Homo sapiens	ArrayExpress, Geo
	Watkins	Hematopoiesis is a carefully controlled process that is regulated by complex networks of transcripti ...	50	MK, erythroblast, B lymphocyte, Th, Tc, granulocyte, monocyte, NK	Microarray (Illumina)	leukomics	Homo sapiens	ArrayExpress
	Weick	Down syndrome (trisomy 21) is the most common genetic cause of intellectual disability, but the prec ...	18	DS iPSC, euploid iPSC-neuron, DS-iPSC neuron, euploid iPSC	Microarray (Affymetrix)		Homo sapiens	Geo
	Weidner	Hematopoietic stem and progenitor cells (HPCs) can be maintained in vitro, but the vast majority of ...	9	HSPC CD34+ Day 0, HSPC CD34+ Day 7, HSPC CD34- Day 7	Microarray (Affymetrix)		Homo sapiens	Geo
	Westfall	To realize the full potential of human embryonic stem cells (hESCs), it is important to develop cult ...	5	4% O2, 20% O2	Microarray (Affymetrix)		Homo sapiens	ArrayExpress, Geo
	Wise	Aim: Macrophage infiltration contributes to the pathogenesis of Type 2 diabetes. Mesenchymal stem ce ...	18	monocyte, diabetic monocyte, monocyte + MSC, diabetic monocyte + MSC	Microarray (Affymetrix)		Homo sapiens	Geo
	Wu	Joint injury and osteoarthritis affect millions of people worldwide, but attempts to generate articu ...	15	whole limb, prechondrocyte, articular chondrocyte	Microarray (Affymetrix)		Homo sapiens	Geo
	Wu	Pluripotency, the ability to generate any cell type of the body, is an evanescent attribute of embry ...	12	ESC, EpiSC, rsEpiSCs E5.75, rsEpiSCs E6.5, Epiblast E5.75, Epiblast E6.5	Microarray (Affymetrix)		Mus musculus	Geo
	Xiao	Osteoclasts (OCs) originate from the myeloid cell lineage, but the successive steps in their lineage ...	6	IL3Ra high progenitor cells, IL3Ra low progenitor cells	RNASeq (Illumina)		Homo sapiens	Geo
	Xu	Polycomb repressive complex 2 (PRC2) plays crucial roles in transcriptional regulation and stem cell ...	15	shNT, shEZH1, shEZH2, shSUZ12, shEED	RNASeq (Illumina)		Homo sapiens	ArrayExpress, Geo
	Xue	Macrophage activation is associated with profound transcriptional reprogramming. Although much progr ...	384	B cell, Tconv, Tmemory, Tnaive, Treg, iTreg, iTreg_IL-2, T-cell, Tstim ...	Microarray (Illumina)		Homo sapiens	ArrayExpress, Geo
	Xue	BACKGROUND: Mouse has served as an excellent model for studying human development and diseases due t ...	35	oocyte, Fertilised egg TS1, Pre-streak embryo TS9, Pre-somite embryo T ...	Microarray (Affymetrix)		Mus musculus	Geo
	Yan	Measuring gene expression in individual cells is crucial for understanding the gene regulatory netwo ...	124	oocyte, zygote, 2-cell embryo, 4-cell embryo, 8-cell embryo, morulae, blastocyst, ESC p0, ESC p10	Single Cell RNASeq (Illumina)		Homo sapiens	Geo
	Yang	The epithelial-to-mesenchymal transition (EMT) is an essential biological process during embryonic d ...	36	H358 Day 0, H358 Day 1, H358 Day 2, H358 Day 3, H358 Day 4, H358 Day 5, H358 Day 6, H358 Day 7, Day 8 shControl, ESRP KD, RBM47_KD	RNASeq (Illumina)		Homo sapiens	Geo
	Yarilina	Rapid induction of inflammatory genes by tumor necrosis factor (TNF) has been well studied, but litt ...	7	MDM, RA synovial macrophage	Microarray (Affymetrix)		Homo sapiens	ArrayExpress, Geo
	Yi	Human embryogenesis is believed to involve an integrated set of complex yet coordinated development ...	18	Embryo 4th week, Embryo 5th week, Embryo 6th week, Embryo 7th week, Embryo 8th week, Embryo 9th week	Microarray (Affymetrix)		Homo sapiens	ArrayExpress, Geo
	Yong	Although most patients with chronic myeloid leukemia (CML) have the same initial molecular abnormali ...	19	Female aggressive CML, Female indolent CML, Male aggressive disease, Male indolent disease	Microarray (Affymetrix)	leukomics	Homo sapiens	ArrayExpress
	Yu	The original method for reprogramming differentiated human cells to induced pluripotent stem cells r ...	28	fibroblast, iPSC, ESC	Microarray (Affymetrix)		Homo sapiens	ArrayExpress, Geo
	Yung	Understanding the transcriptional cues that direct differentiation of human embryonic stem cells (hE ...	8	ESC, CD31+ KDR+ cells day 4, CD31+ KDR+ cells day 6, CD31+ KDR+ cells day 8	Microarray (Affymetrix)		Homo sapiens	Geo
	Zaehres	Somatic stem cells can be isolated from human umbilical cord blood, and cord blood samples are often ...	12	UCBSC, hUiPS, hNiPS 1F, hNiPS 2F, H1 hESC, H9 hESC	Microarray (Illumina)		Homo sapiens	ArrayExpress, Geo
	Zamanian	Reactive astrogliosis is characterized by a profound change in astrocyte phenotype in response to al ...	29	astrocyte + saline treatment day 1, astrocyte + LPS treatment day 1, a ...	Microarray (Affymetrix)		Mus musculus	Geo
	Zeltner	Human pluripotent stem cells (hPSCs) have great potential for studying human embryonic development, ...	12	ESC-derived neuroepithelial cell, ESC-derived NCC MS5 protocol, ESC-derived NCC R-NC protocol, ESC-derived NCC WNT protocol	Microarray (Illumina)		Homo sapiens	Geo
	Zhang	RATIONALE: An efficient and reproducible source of genotype-specific human macrophages is essential ...	33	iPSC, MDM, iMac, MDM+IL4, iMAC+IL4, MDM+LPS +IFNg, iMAC+LPS+IFNg	RNASeq (Illumina)		Homo sapiens	Geo
	Zhang	The segmental premature aging disease Hutchinson-Gilford Progeria syndrome (HGPS) is caused by a tru ...	23	ESC, iPSC, iPSC HGPS, fibroblast, fibroblast HGPS, MSC, PSC-MSC, HGPS iPSC-MSC	Microarray (Illumina)		Homo sapiens	ArrayExpress, Geo
	Zhang	The major cell classes of the brain differ in their developmental processes, metabolism, signaling, ...	17	whole cortex, astrocyte, endothelial cell, microglia, neuron, oligodendrocyte precursor, newly formed oligodendrocyte, myelinating oligodendrocyte	RNASeq (Illumina)		Mus musculus	Geo
	Zhang	Tyrosine kinase inhibitors (TKIs) are highly effective in treatment of chronic myeloid leukemia (CML ...	12	CML, CML + IM, CML+ MSC, CML + IM and MSC	Microarray (Affymetrix)	leukomics	Homo sapiens	Geo
	Zhang	Imatinib mesylate (IM) induces remission in chronic myelogenous leukemia (CML) patients but does not ...	12	CML control, CML with IM, CML with LBH, CML with IM + LBH	Microarray (Affymetrix)	leukomics	Homo sapiens	ArrayExpress, Geo
	Zheng	Despite recent success in the treatment of early-stage disease, blastic phase (BP) of chronic myeloi ...	20	CP-CML, BP-CML	Microarray (Affymetrix)	leukomics	Homo sapiens	ArrayExpress
	Zhu	Although mechanisms underlying early steps in cerebellar development are known, evidence is lacking ...	33	P0 cerebellar granule cells, P7 cerebellar granule cells, P12 cerebell ...	Microarray (Affymetrix)		Mus musculus	Geo
	Zhu	Human induced pluripotent stem cells (iPSCs) have the capability of revolutionizing research and the ...	11	iPSC-Hep, iMPC-Hep, cultured hepatocyte, hepatocyte, in vivo repopulating iMPC-Hep	Microarray (Affymetrix)		Homo sapiens	Geo
	Zigmond	The liver has a remarkable capacity to regenerate after injury; yet, the role of macrophages (MF) in ...	11	KC, KC APAP 72h, MDM 72h, monocyte 24h	Microarray (Affymetrix)		Mus musculus	ArrayExpress, Geo

## Sheet: LINCS
Cell Type	Cell Name	Tissue Ontology/Organ	Organism	Culture Conditions	Datasets	OMICS																	Reference
ESC	HUES3		Homo Sapiens			Transcriptomics
ESC	ReNcell VM		Homo Sapiens			Proteomics
ESC	H9
iPSC	MSN27-03S			human pluripotent stem cell medium, including mTeSR	datasets
iPSC	MSN05-01R			human pluripotent stem cell medium, including mTeSR	datasets
iPSC	CS83iSMA-n5			mTeSR1, Growth Factor Reduced Matrigel	4 datasets	Transcriptomics; Proteomics; Epigenomics
iPSC	MSN32-04S			human pluripotent stem cell medium, including mTeSR	datasets
iPSC	MSN37-01S			human pluripotent stem cell medium, including mTeSR	datasets
iPSC	CS28iALS-C9n2				datasets
iPSC	CS52iALS-C9n6				datasets
iPSC	CS77iSMA-n5			mTeSR1, Growth Factor Reduced Matrigel	4 datasets	Transcriptomics; Proteomics; Epigenomics
iPSC	FIBRNPC				1 datasets	Transcriptomics
iPSC	CS166isALS-Tn2				datasets
iPSC	MSN39-04S			human pluripotent stem cell medium, including mTeSR	datasets
iPSC	MSN13-02R			human pluripotent stem cell medium, including mTeSR	datasets
iPSC	MSN18-03S			human pluripotent stem cell medium, including mTeSR	datasets
iPSC	MSN03-05S			human pluripotent stem cell medium, including mTeSR	datasets
iPSC	MSN14-06S			human pluripotent stem cell medium, including mTeSR	datasets
iPSC	MSN03-01S			human pluripotent stem cell medium, including mTeSR	datasets
iPSC	MSN30-04S			human pluripotent stem cell medium, including mTeSR	datasets
iPSC	MSN01-03R			human pluripotent stem cell medium, including mTeSR	datasets
iPSC	MSN33-04S			human pluripotent stem cell medium, including mTeSR	datasets
iPSC	MSN25-20S			human pluripotent stem cell medium, including mTeSR	datasets
iPSC	MSN11-05S			human pluripotent stem cell medium, including mTeSR	datasets
iPSC	MSN12-04S			human pluripotent stem cell medium, including mTeSR	datasets
iPSC	MSN14-05S			human pluripotent stem cell medium, including mTeSR	datasets
iPSC	MSN34-05S			human pluripotent stem cell medium, including mTeSR	datasets
iPSC	MSN30-01S			human pluripotent stem cell medium, including mTeSR	datasets
iPSC	MSN09-02S			human pluripotent stem cell medium, including mTeSR	datasets
iPSC	MSN31-01S			human pluripotent stem cell medium, including mTeSR	datasets
iPSC	MSN26-01S			human pluripotent stem cell medium, including mTeSR	datasets
iPSC	MSN38-04S			human pluripotent stem cell medium, including mTeSR	datasets
iPSC	CS32iSMA-n3			mTeSR1, Growth Factor Reduced Matrigel	4 datasets	Transcriptomics; Proteomics; Epigenomics
iPSC	CS138isALS-Tn1				datasets
iPSC	MSN10-07S			human pluripotent stem cell medium, including mTeSR	datasets
iPSC	MSN30-02S			human pluripotent stem cell medium, including mTeSR	datasets
iPSC	MSN10-01R			human pluripotent stem cell medium, including mTeSR	datasets
iPSC	MSN06-07R			human pluripotent stem cell medium, including mTeSR	datasets
iPSC	CS04iALS-SOD1H44Rn3				datasets
iPSC	MSN20-06S			human pluripotent stem cell medium, including mTeSR	datasets
iPSC	MSN03-08R			human pluripotent stem cell medium, including mTeSR	datasets
iPSC	MSN25-09S			human pluripotent stem cell medium, including mTeSR	datasets
iPSC	CS30iALS-C9n1				datasets
iPSC	MSN40-05S			human pluripotent stem cell medium, including mTeSR	datasets
iPSC	MSN13-03S			human pluripotent stem cell medium, including mTeSR	datasets
iPSC	CS00iCTR-n2				datasets
iPSC	MSN29-03S			human pluripotent stem cell medium, including mTeSR	datasets
iPSC	MSN17-07S			human pluripotent stem cell medium, including mTeSR	datasets
iPSC	MSN09-04R			human pluripotent stem cell medium, including mTeSR	datasets
iPSC	MSN19-07S			human pluripotent stem cell medium, including mTeSR	datasets
iPSC	MSN14-01S			human pluripotent stem cell medium, including mTeSR	datasets
iPSC	MSN16-04S			human pluripotent stem cell medium, including mTeSR	datasets
iPSC	CS29iALS-C9n1				datasets
iPSC	MSN08-06S			human pluripotent stem cell medium, including mTeSR	datasets
iPSC	MSN24-06S			human pluripotent stem cell medium, including mTeSR	datasets
iPSC	CS152isALS-Tn2				datasets
iPSC	CS14iCTR-n6			mTeSR1, Growth Factor Reduced Matrigel	5 datasets	Transcriptomics; Proteomics; Epigenomics
iPSC	CS52iALS-n6A			mTeSR1, Growth Factor Reduced Matrigel	3 datasets	Transcriptomics; Proteomics
iPSC	CS29iALS-n1N			mTeSR1, Growth Factor Reduced Matrigel	4 datasets	Transcriptomics; Proteomics; Epigenomics
iPSC	MSN28-05S			human pluripotent stem cell medium, including mTeSR	datasets
iPSC	MSN21-08S			human pluripotent stem cell medium, including mTeSR	datasets
iPSC	MSN23-01S			human pluripotent stem cell medium, including mTeSR	datasets
iPSC	CS83iCTR-33n1			mTeSR1, Growth Factor Reduced Matrigel	3 datasets	Transcriptomics; Epigenomics
iPSC	MSN35-05S			human pluripotent stem cell medium, including mTeSR	datasets
iPSC	CS30iALS-n1N			mTeSR1, Growth Factor Reduced Matrigel	4 datasets	Transcriptomics; Proteomics; Epigenomics
iPSC	MSN30-03S			human pluripotent stem cell medium, including mTeSR	datasets
iPSC	MSN04-05S			human pluripotent stem cell medium, including mTeSR	datasets
iPSC	MSN01-02S			human pluripotent stem cell medium, including mTeSR	datasets
iPSC	CS14isALS-Tn16				datasets
iPSC	MSN07-07S			human pluripotent stem cell medium, including mTeSR	datasets
iPSC	MSN03-06S			human pluripotent stem cell medium, including mTeSR	datasets
iPSC	CS28iALS-n2A			mTeSR1, Growth Factor Reduced Matrigel	4 datasets	Transcriptomics; Proteomics; Epigenomics
iPSC	MSN22-04S			human pluripotent stem cell medium, including mTeSR	datasets
iPSC	MSN36-06S			human pluripotent stem cell medium, including mTeSR	datasets
iPSC	CS11iALS-SOD1I113Tn10				datasets
iPSC	CS22iALS-SOD1I113Tn2				datasets
iPSC	MSN02-01S			human pluripotent stem cell medium, including mTeSR	datasets
iPSC	MSN03-7			human pluripotent stem cell medium, including mTeSR	datasets
iPSC	MSN08-13R			human pluripotent stem cell medium, including mTeSR	datasets
iPSC	MSN25-04S			human pluripotent stem cell medium, including mTeSR	datasets
iPSC	CS25iCTR-18n2			mTeSR1, Growth Factor Reduced Matrigel	5 datasets	Transcriptomics; Proteomics; Epigenomics
iPSC	MSN02-04R			human pluripotent stem cell medium, including mTeSR	datasets
Primary	PromoCell cardiomyocytes Line B		Homo Sapiens		3 datasets	Transcriptomics
Primary	W15-C166				datasets
Primary	MSN38-FB	Fibroblast	Homo Sapiens		datasets
Primary	MSN31-FB	Fibroblast	Homo Sapiens		datasets
Primary	MSN40-FB	Fibroblast	Homo Sapiens		datasets
Primary	MSN06-FB	Fibroblast	Homo Sapiens		datasets
Primary	MSN25-FB	Fibroblast	Homo Sapiens		datasets
Primary	MSN34-FB	Fibroblast	Homo Sapiens		datasets
Primary	MSN36-FB		Homo Sapiens		datasets
Primary	F09129	Fibroblast	Homo Sapiens		datasets
Primary	MSN21-FB	Fibroblast	Homo Sapiens		datasets
Primary	N2759	synoviocytes	Homo Sapiens		2 datasets	Binding
Primary	MSN02-FB	Fibroblast	Homo Sapiens		datasets
Primary	83 Fibroblast	Fibroblast	Homo Sapiens		datasets
Primary	MSN28-FB	Fibroblast	Homo Sapiens		datasets
Primary	MSN35-FB	Fibroblast	Homo Sapiens		datasets
Primary	RA2708	synoviocytes	Homo Sapiens		2 datasets	Binding
Primary	RA2159	synoviocytes	Homo Sapiens		3 datasets	Binding
Primary	MSN33-FB	Fibroblast	Homo Sapiens		datasets
Primary	GM00232	Fibroblast	Homo Sapiens		datasets
Primary	MSN19-FB	Fibroblast	Homo Sapiens		datasets
Primary	MSN12-FB	Fibroblast	Homo Sapiens		datasets
Primary	PromoCell cardiomyocytes Line A	Cardiomyocyte	Homo Sapiens		3 datasets	Transcriptomics
Primary	PromoCell cardiomyocytes Line F	Cardiomyocyte	Homo Sapiens		datasets
Primary	W14-C146				datasets
Primary	MSN14-FB	Fibroblast	Homo Sapiens		datasets
Primary	W14-C152				datasets
Primary	SAB-701-022				datasets
Primary	MSN09-FB	Fibroblast	Homo Sapiens		datasets
Primary	F09152	Fibroblast	Homo Sapiens		datasets
Primary	MSN18-FB	Fibroblast	Homo Sapiens		datasets
Primary	MSN37-FB	Fibroblast	Homo Sapiens		datasets
Primary	MSN20-FB	Fibroblast	Homo Sapiens		datasets
Primary	MSN30-FB	Fibroblast	Homo Sapiens		datasets
Primary	W14-C138				datasets
Primary	PromoCell cardiomyocytes Line G	Cardiomyocyte	Homo Sapiens		datasets
Primary	MSN29-FB	Fibroblast	Homo Sapiens		datasets
Primary	F10-330	Fibroblast	Homo Sapiens		datasets
Primary	PromoCell cardiomyocytes Line E	Cardiomyocyte	Homo Sapiens		3 datasets	Transcriptomics; Proteomics
Primary	MSN22-FB	Fibroblast	Homo Sapiens		datasets
Primary	RA1931	synoviocytes	Homo Sapiens		2 datasets	Binding
Primary	MSN24-FB	Fibroblast	Homo Sapiens		datasets
Primary	MSN32-FB	Fibroblast	Homo Sapiens		datasets
Primary	N2586	synoviocytes	Homo Sapiens		3 datasets	Binding
Primary	MSN05-FB	Fibroblast	Homo Sapiens		datasets
Primary	MSN16-FB	Fibroblast	Homo Sapiens		datasets
Primary	MSN03-FB	Fibroblast	Homo Sapiens		datasets
Primary	MSN23-FB	Fibroblast	Homo Sapiens		datasets
Primary	RA1869	synoviocytes	Homo Sapiens		2 datasets	Binding
Primary	GM03814	Fibroblast	Homo Sapiens		datasets
Primary	MSN13-FB	Fibroblast	Homo Sapiens		datasets
Primary	MSN27-FB	Fibroblast	Homo Sapiens		datasets
Primary	F09229		Homo Sapiens		datasets
Primary	MSN26-FB	Fibroblast	Homo Sapiens		datasets
Primary	GM02183	Fibroblast	Homo Sapiens		datasets
Primary	MSN15-FB	Fibroblast	Homo Sapiens		datasets
Primary	MSN07-FB	Fibroblast	Homo Sapiens		datasets
Primary	GM09677	Fibroblast	Homo Sapiens		datasets
Primary	F09128	Fibroblast	Homo Sapiens		datasets
Primary	GM10684	Fibroblast	Homo Sapiens		datasets
Primary	GM05400	Fibroblast	Homo Sapiens		datasets
Primary	MSN01-FB	Fibroblast	Homo Sapiens		datasets
Primary	MSN08-FB	Fibroblast	Homo Sapiens		datasets
Primary	MSN17-FB	Fibroblast	Homo Sapiens		datasets
Primary	MSN04-FB	Fibroblast	Homo Sapiens		datasets
Primary	F13-C004				datasets
Primary	MSN11-FB	Fibroblast	Homo Sapiens		datasets
Primary	PWS-711-011				datasets
Primary	N2645	synoviocytes	Homo Sapiens		2 datasets	Binding
Primary	MSN10-FB	Fibroblast	Homo Sapiens		datasets
Primary	ND30625	Fibroblast	Homo Sapiens		datasets
Primary	PromoCell cardiomyocytes Line D	Cardiomyocyte	Homo Sapiens		4 datasets	Transcriptomics; Proteomics
Primary	MSN39-FB	Fibroblast	Homo Sapiens		datasets

## Sheet:  LifeMap Discovery  
Cell Type	Name	Tissue Ontology/Organ	Genes	Cell Therapies
ASC	ABCD-1-transduced peripheral blood-derived hematopoietic stem cells	Blood	2	1
ASC	Activated peripheral blood derived-mononuclear cells (PROVENGE®)	Blood	1	1
ASC	Adenosine deaminase-transduced hematopoietic stem cells	Blood	2	1
ASC	Adipose tissue-derived stem cells	Adipose, Mesenchymal Stem Cells	6
ASC	Adipose-derived mesenchymal stem cells	Adipose, Mesenchymal Stem Cells	45	24
ASC	Adipose-derived mesenchymal stromal cells	Adipose, Mesenchymal Stem Cells	6	1
ASC	Adipose-derived stem and regenerative cells	Adipose	4	1
ASC	Adipose-derived stem cells	Adipose, Mesenchymal Stem Cells	31	7
ASC	Adipose-derived stromal cells	Adipose, Mesenchymal Stem Cells	15
ASC	Amnion-derived mesenchymal stem cells	Amnion, Mesenchymal Stem Cells	26
ASC	Angiogenic cell precursors	Blood, Endothelium	13	2
ASC	ATIR™, photodepletion-treated T-cells	Blood	3	1
ASC	Bone Marrow Aspirate Concentrated Nucleated Cells (BMAC)	Blood	3	2
ASC	Bone marrow-derived adherent progenitor cells (MultiStem)	Bone	19	8
ASC	Bone marrow-derived ALDH+ cells (ALD)	Bone	6	4
ASC	Bone marrow-derived autologous CD34+cells (AMR-001)	Blood	2	1
ASC	Bone marrow-derived CD133+ cells	Blood	2	2
ASC	Bone marrow-derived CD133+ hematopoietic stem cells	Blood	1	1
ASC	Bone marrow-derived CD133+ stem cells	Blood	5	3
ASC	Bone marrow-derived CD34+/CXCR4+ cells	Blood	2	1
ASC	Bone marrow-derived endothelial progenitor cells	Endothelium	15	1
ASC	Bone marrow-derived hematopoietic CD34+ progenitors	Blood	1	1
ASC	Bone marrow-derived hematopoietic stem cells	Blood	122	16
ASC	Bone marrow-derived mesenchymal stem cell	Bone, Mesenchymal Stem Cells	348	103
ASC	Bone marrow-derived mesenchymal stromal cells	Bone, Mesenchymal Stem Cells	9	3
ASC	Bone marrow-derived mononuclear cells	Blood	21	51
ASC	Bone marrow-derived progenitor cells	Bone	1	1
ASC	Bone marrow-derived stem cells	Bone	10	2
ASC	Cardiac progenitor cells (c-kit+)	Heart	3
ASC	Cardiac stem cells	Heart	16	1
ASC	Cardiomyocyte progenitor cells	Heart	19
ASC	Chondrocyte progenitor cells	Cartilage	1	1
ASC	Clonal bone marrow-derived mesenchymal stem cells (Homeo-GH)	Bone, Mesenchymal Stem Cells	10	1
ASC	Decidua-derived mesenchymal cells	Mesenchymal Stem Cells, Placenta	113
ASC	Decidua-derived mesenchymal stem cells	Mesenchymal Stem Cells, Placenta	15
ASC	Dental pulp stem cells	Tooth	78
ASC	Endometrial regenerative cells	Uterus	16	2
ASC	eNOS-transfected endothelial progenitor cells	Endothelium	2	2
ASC	Expanded adipose-derived mesenchymal stem cells (Cx601)	Adipose, Mesenchymal Stem Cells		1
ASC	Expanded umbilical cord blood-derived hematopoietic stem cells	Blood, Umbilical Cord	1	1
ASC	Facilitating cells	Blood	7	1
ASC	FancA-sW-transduced peripheral blood- or bone marrow- derived stem cells	Blood	1	1
ASC	GLP-transfected mesenchymal stem cells	Bone	8	1
ASC	Hair follicle mesenchymal stem cells (RepliCel Hair-01)	Hair, Mesenchymal Stem Cells		1
ASC	Hair follicle stem cells	Hair	21
ASC	Hair follicle-derived mesenchymal stem cells	Hair, Mesenchymal Stem Cells	9
ASC	Hepatic Mesenchymal Stem Cells	Liver, Mesenchymal Stem Cells	6
ASC	Human cardiac stem cells	Heart	21	2
ASC	Human multipotent adipose-derived (hMAD) stem cells	Adipose, Mesenchymal Stem Cells	11	1
ASC	Immortalized hair follicle stem cells	Hair	5
ASC	Limbal corneal epithelial stem cells	Epithelial Cells, Eye	12	2
ASC	Limbal epithelial stem cells	Epithelial Cells, Eye	101	9
ASC	Limbal stem cells	Epithelial Cells, Eye	17	4
ASC	Mesenchymal Precursor Cells (STRO-3 selected)	Bone	11	5
ASC	MultiGeneAngio, transduced vein-derived endothelial cells	Endothelium, Smooth Muscle	2	2
ASC	MyoD-transduced multipotent adipose-derived stem cells	Adipose, Mesenchymal Stem Cells	7	1
ASC	Natal dental pulp stem cells	Tooth	34
ASC	Notch-transfected mesenchymal stromal cells (SB623)	Bone, Mesenchymal Stem Cells	36	1
ASC	Parietal epithelial cells (PEC)	Epithelial Cells, Kidney	17	1
ASC	Peripheral blood endothelial colony-forming cells	Endothelium	3
ASC	Peripheral blood-derived CD14+ monocytes	Blood	5
ASC	Peripheral blood-derived CD34+ cells	Blood	1	1
ASC	Peripheral blood-derived early endothelial progenitor cells	Endothelium	2
ASC	Peripheral blood-derived endothelial cells	Blood	2	1
ASC	Peripheral blood-derived endothelial progenitor cells	Endothelium	96	8
ASC	Peripheral blood-derived hematopoietic stem cells	Blood	131	39
ASC	Peripheral blood-derived mesenchymal stem cells	Blood, Mesenchymal Stem Cells		1
ASC	Peripheral blood/mobilized hematopoietic stem cells	Blood	2
ASC	Placenta-derived adherent stromal cell (PLX)	Mesenchymal Stem Cells, Placenta	10	2
ASC	Placenta-derived cells	Placenta	8	5
ASC	Placenta-derived mesenchymal stem cells	Mesenchymal Stem Cells, Placenta	194	6
ASC	Pulmonary mesenchymal stem cells	Lung, Mesenchymal Stem Cells	11
ASC	Selected regenerative renal cells	Epithelial Cells, Kidney		1
ASC	Skeletal myoblasts (MyoCell®)	Skeletal Muscle	1	1
ASC	Stem cells from human exfoliated deciduous teeth	Tooth	86
ASC	Tissue repair cells	Bone, Mesenchymal Stem Cells	4	1
ASC	Trabecular meshwork-derived mesenchymal stem cells	Eye, Mesenchymal Stem Cells	138
ASC	Tumor infiltrating lymphocytes	Blood	3	1
ASC	Umbilical cord blood-derived CD133+ cells	Blood, Umbilical Cord	2	1
ASC	Umbilical cord blood-derived hematopoietic stem cells	Blood, Umbilical Cord	10
ASC	Wharton-Jelly-derived mesenchymal stem cells	Mesenchymal Stem Cells, Umbilical Cord	6	1
EP	PureStem™ E15, Meso-prx/latp Progenitor	Lateral Plate Mesoderm, Paraxial Mesoderm	106
EP	PureStem™ 4D20.8, NCr-fac Progenitor	Neural Crest	108	1
EP	PureStem™ ES-209, Meso-prx/latp Progenitor	Lateral Plate Mesoderm, Paraxial Mesoderm	108
EP	PureStem™ 7PEND24, NCr-fac & Meso-prx Progenitor	Neural Crest, Paraxial Mesoderm	106
EP	PureStem™ 7SMOO32, NCr-fac & Meso Progenitor	Mesoderm, Neural Crest	107
EP	PureStem™ endothelial progenitor	Blood, Endothelium	315
EP	PureStem™ ES Progenitor	Ectoderm, Endothelium	207
EP	PureStem™ MEL2, NCr-fac Progenitor	Neural Crest	112
EP	PureStem™ progenitor	Uncategorized	1999
EP	PureStem™ SK11, NCr-fac & Meso-prx Progenitor	Neural Crest, Paraxial Mesoderm	105
EP	PureStem™ SM30, NCr-fac & Meso-latp Progenitor	Lateral Plate Mesoderm, Neural Crest	102
EP	PureStem™ Z11, Meso Progenitor	Mesoderm	104
ESC	Elf1 (Naive)	Inner cell mass	2
ESC	ES01(HES-1)	Inner cell mass	1
ESC	ES02(HES-2)	Inner cell mass	1
ESC	ES03(HES-3)	Inner cell mass	101
ESC	ES04(HES-4)	Inner cell mass	1
ESC	ESI-017	Inner cell mass	6
ESC	ESI-035	Inner cell mass	5
ESC	ESI-049	Inner cell mass	6
ESC	ESI-051	Inner cell mass	5
ESC	ESI-053	Inner cell mass	5
ESC	FES22	Inner cell mass	11
ESC	FES29	Inner cell mass	11
ESC	HB9::GFP genetically modified stem cells	Inner cell mass
ESC	HS360	Inner cell mass	5
ESC	HS362	Inner cell mass	4
ESC	HSF-1 (UC01)	Inner cell mass	27
ESC	HSF-6 (UC06)	Inner cell mass	1
ESC	HuESC-1	Inner cell mass	1
ESC	HuESC-2	Inner cell mass	1
ESC	HuESC-3	Inner cell mass	1
ESC	HuESC-4	Inner cell mass	1
ESC	HuESC-5	Inner cell mass	1
ESC	HuESC-6	Inner cell mass	1
ESC	HuESC-7	Inner cell mass	1
ESC	HuESC-8	Inner cell mass	1
ESC	HuESC-9	Inner cell mass	1
ESC	HuESC-10	Inner cell mass	1
ESC	HuESC-11	Inner cell mass	1
ESC	HuESC-12	Inner cell mass	1
ESC	HuESC-13	Inner cell mass	1
ESC	HuESC-14	Inner cell mass	1
ESC	HuESC-15	Inner cell mass	1
ESC	HuESC-16	Inner cell mass	1
ESC	HuESC-17	Inner cell mass	1
ESC	Human embryonic stem cells	Inner cell mass	861
ESC	I3 (TE03)	Inner cell mass
ESC	I6 (TE06)	Inner cell mass
ESC	Kyoto human embryonic stem cell 1	Inner cell mass	3
ESC	Kyoto human embryonic stem cell 2	Inner cell mass	3
ESC	Kyoto human embryonic stem cell 3	Inner cell mass	3
ESC	Line H1 (Naive)	Inner cell mass	3
ESC	Line H1 (WA01)	Inner cell mass	125
ESC	Line H13 (WA13)	Inner cell mass
ESC	Line H14 (WA14)	Inner cell mass
ESC	Line H7 (WA07)	Inner cell mass	104
ESC	Line H9 (Naive)	Inner cell mass	103
ESC	Line H9 (WA09)	Inner cell mass	561
ESC	LIS1 (Naive)	Inner cell mass	3
ESC	LIS2 (Naive)	Inner cell mass	3
ESC	MA01	Inner cell mass	2
ESC	MA09	Inner cell mass	2
ESC	MIXL1::GFP genetically modified stem cells	Inner cell mass	2
ESC	MYH6-mCherry genetically modified stem cells	Inner cell mass
ESC	Naive human embryonic stem cells	Inner cell mass	107
ESC	NCL1	Inner cell mass	4
ESC	RCM1	Inner cell mass	2
ESC	Regea 06/040	Inner cell mass	5
ESC	Regea 08/017	Inner cell mass	2
ESC	Regea 08/023	Inner cell mass	5
ESC	Rockefeller university embryonic stem cell line 1	Inner cell mass	4
ESC	Rockefeller university embryonic stem cell line 2	Inner cell mass	5
ESC	SA01	Inner cell mass	2
ESC	Seoul National University hESC16	Inner cell mass	2
ESC	SHEF-1	Inner cell mass	4
ESC	SHEF-3	Inner cell mass	4
ESC	SHEF-4	Inner cell mass	4
ESC	SHEF-5	Inner cell mass
ESC	SHEF-6	Inner cell mass	4
ESC	SNUhES1	Inner cell mass	7
ESC	SNUhES2	Inner cell mass	1
ESC	SNUhES3	Inner cell mass	1
ESC	Ubiquitin::GFP genetically modified stem cells	Inner cell mass	4
ESC	VAL-9	Inner cell mass	6
ESC	VUB02	Inner cell mass	9
ESC	VUB03_DM1	Inner cell mass	9
ESC	VUB04_CF	Inner cell mass	9
ESC	VUB07	Inner cell mass	8
ESC	VUB09_FSHD	Inner cell mass	8
ESC	VUB14	Inner cell mass	6
ESC	WIS1 (Naive)	Inner cell mass	3
ESC	WIS2 (Naive)	Inner cell mass	3
FSC	Amniotic fluid stem cells	Amnion	2	1
FSC	Central nervous system progenitor cells	Brain	1
FSC	Cord blood-derived hematopoietic stem cell	Blood, Umbilical Cord	1	1
FSC	Epithelial cells (fetal lung)	Epithelial Cells, Lung
FSC	Fetal spinal cord stem cells (NSI-566)	Spinal Cord	7	1
FSC	Human amniotic fluid stem cells	Amnion	1
FSC	Human fetal bone marrow-derived mesenchymal stromal cells	Bone	3
FSC	Human fetal pancreatic progenitor cells	Epithelial Cells, Pancreas	13
FSC	Human neural stem cells (HuCNS-SC®)	Brain	4	1
FSC	Neural stem cells	Spinal Cord	11
FSC	Neural stem/progenitor cells (family)	Central Nervous System, Neurons	21	1
FSC	Placenta-derived mesenchymal stem cells	Mesenchymal Stem Cells, Placenta	7	1
FSC	Umbilical cord blood ALDH+ cells (ALD-151)	Blood, Umbilical Cord	2	2
FSC	Umbilical cord blood stem/progenitor cells (Stemex)	Blood, Umbilical Cord	2	1
FSC	Umbilical cord blood-derived endothelial progenitor cells	Endothelium, Umbilical Cord	47	1
FSC	Umbilical cord blood-derived hematopoietic progenitor cells	Blood, Umbilical Cord	4	3
FSC	Umbilical cord blood-derived hematopoietic stem cells	Blood, Umbilical Cord	64	16
FSC	Umbilical cord blood-derived mesenchymal stem cells	Blood, Mesenchymal Stem Cells, Umbilical Cord	270	1
FSC	Umbilical cord blood-derived mesenchymal stem cells type 1,2	Mesenchymal Stem Cells, Umbilical Cord	211
FSC	Umbilical cord blood-derived mesenchymal stem/progenitor cells	Blood, Mesenchymal Stem Cells, Umbilical Cord	19	1
FSC	Umbilical cord blood-derived mononuclear cells	Blood, Umbilical Cord	1	4
FSC	Umbilical cord blood-derived multipotent stem cells	Umbilical Cord	12	1
FSC	Umbilical cord blood-derived stem cells	Blood, Umbilical Cord	1	1
FSC	Umbilical cord-derived mesenchymal stem cells	Mesenchymal Stem Cells, Umbilical Cord	170	33
FSC	Wharton's jelly stem cells	Umbilical Cord	2
FSC	Wharton's jelly-derived mesenchymal stem cells	Mesenchymal Stem Cells, Umbilical Cord	165
FSC	Wharton's jelly-derived stem cells	Umbilical Cord	99
iPS	201B6	Inner cell mass	22
iPS	201B7	Inner cell mass	29
iPS	253G1	Inner cell mass	11
iPS	253G4	Inner cell mass	13
iPS	4F1.1	Inner cell mass	17
iPS	A116	Inner cell mass	2
iPS	A6	Inner cell mass	3
iPS	BC1	Inner cell mass	3
iPS	Bi.1-3	Inner cell mass	3
iPS	BJ	Inner cell mass	2
iPS	C2a	Inner cell mass	100
iPS	DF19-9-11T	Inner cell mass
iPS	DF6-9-9T	Inner cell mass	3
iPS	Fibro-Epi	Inner cell mass	3
iPS	HEL24.3	Inner cell mass	1
iPS	hIPS1	Inner cell mass	109
iPS	hIPS2	Inner cell mass	108
iPS	HUF4	Inner cell mass	3
iPS	IMR90-1, 2, 3, 4	Inner cell mass	8
iPS	Induced pluripotent stem cell line 1	Inner cell mass	102
iPS	IPRN13.13	Inner cell mass	3
iPS	IPRN14.57	Inner cell mass	3
iPS	IPS4	Inner cell mass	6
iPS	IPS5	Inner cell mass	2
iPS	K04	Inner cell mass	5
iPS	L1B34	Inner cell mass	3
iPS	L1B41	Inner cell mass	3
iPS	L1C51	Inner cell mass	3
iPS	MR31	Inner cell mass	1
iPS	MRC5	Inner cell mass	3
iPS	OSR1-GFP genetically modified stem cells	Inner cell mass
iPS	Reprogrammed congenital amegakaryocytic thrombocytopenia cells	Inner cell mass
iPS	Reprogrammed mucopolysaccharidosis type IIIB disease cells	Inner cell mass
iPS	Reprogrammed adenosine deaminase deficiency severe combined immunodeficiency cells	Inner cell mass
iPS	Reprogrammed alpha-1 antitrypsin deficiency cells	Inner cell mass	3
iPS	Reprogrammed Alzheimer's disease cells	Inner cell mass
iPS	Reprogrammed amyotrophic lateral sclerosis cells	Inner cell mass
iPS	Reprogrammed aplastic anemia cells	Inner cell mass
iPS	Reprogrammed arrhythmogenic right ventricular dysplasia/cardiomyopathy cells	Inner cell mass
iPS	Reprogrammed azoospermia cells	Inner cell mass
iPS	Reprogrammed Becker muscular dystrophy cells	Inner cell mass
iPS	Reprogrammed catecholaminergic polymorphic ventricular tachycardia cells	Inner cell mass
iPS	Reprogrammed childhood cerebral adrenoleukodystrophy cells	Inner cell mass
iPS	Reprogrammed chronic granulomatous disease cells	Inner cell mass
iPS	Reprogrammed chronic infantile neurologic cutaneous and articular syndrome	Inner cell mass
iPS	Reprogrammed Cooley’s anemia cells	Inner cell mass
iPS	Reprogrammed Crigler-Najjar syndrome cells	Inner cell mass	3
iPS	Reprogrammed cystic fibrosis cells	Inner cell mass
iPS	Reprogrammed Down syndrome cells	Inner cell mass
iPS	Reprogrammed Dravet syndrome cells	Inner cell mass
iPS	Reprogrammed Duchenne muscular dystrophy cells	Inner cell mass
iPS	Reprogrammed familial dysautonomia cells	Inner cell mass
iPS	Reprogrammed familial hypercholesterolemia cells	Inner cell mass
iPS	Reprogrammed familial hypertrophic cardiomyopathy cells	Inner cell mass
iPS	Reprogrammed Fanconi's anemia cells	Inner cell mass
iPS	Reprogrammed Gaucher disease cells	Inner cell mass
iPS	Reprogrammed glycogen storage disease type 1a cells	Inner cell mass	3
iPS	Reprogrammed gyrate atrophy cells	Inner cell mass
iPS	Reprogrammed hereditary spastic paraplegias cells	Inner cell mass
iPS	Reprogrammed hereditary tyrosinemia type 1 cells	Inner cell mass	3
iPS	Reprogrammed human umbilical vein endothelial cells	Inner cell mass	2
iPS	Reprogrammed Huntington's disease cells	Inner cell mass
iPS	Reprogrammed juvenile-onset type 1 diabetes mellitus cells	Inner cell mass
iPS	Reprogrammed Leber’s congenital amaurosis cells	Inner cell mass
iPS	Reprogrammed Leber’s hereditary optic neuropathy cells	Inner cell mass
iPS	Reprogrammed LEOPARD syndrome cells	Inner cell mass
iPS	Reprogrammed long QT syndrome cells	Inner cell mass
iPS	Reprogrammed Marfan syndrome cells	Inner cell mass
iPS	Reprogrammed maturity onset diabetes of the young type 1, 2, 3, 5, 8 cells	Inner cell mass
iPS	Reprogrammed mitochondrial encephalomyopathy with lactic acidosis and stroke-like episodes cells	Inner cell mass
iPS	Reprogrammed myeloproliferative disorders cells	Inner cell mass
iPS	Reprogrammed myotonic dystrophy type 1 cells	Inner cell mass
iPS	Reprogrammed Niemann-Pick type C1 disease cells	Inner cell mass
iPS	Reprogrammed olivopontocerebellar atrophy cells	Inner cell mass
iPS	Reprogrammed osteoarthritis disorder cells	Inner cell mass
iPS	Reprogrammed Parkinson's disease cells	Inner cell mass
iPS	Reprogrammed Pelizaeus–Merzbacher disease cells	Inner cell mass
iPS	Reprogrammed polycythemia vera cells	Inner cell mass
iPS	Reprogrammed pompe disease cells	Inner cell mass
iPS	Reprogrammed recessive dystrophic epidermolysis bullosa cells	Inner cell mass
iPS	Reprogrammed retinitis pigmentosa cells	Inner cell mass
iPS	Reprogrammed schizophrenia cells	Inner cell mass
iPS	Reprogrammed severe alpha-1-antitrypsin deficiency cells	Inner cell mass
iPS	Reprogrammed severe congenital neutropenia cells	Inner cell mass
iPS	Reprogrammed sickle cell anemia cells	Inner cell mass
iPS	Reprogrammed sickle cell disease cells (Episomal)	Inner cell mass
iPS	Reprogrammed spinal and bulbar muscular atrophy cells	Inner cell mass
iPS	Reprogrammed spinal muscular atrophy cells	Inner cell mass
iPS	Reprogrammed supravalvular aortic stenosis cells	Inner cell mass
iPS	Reprogrammed systemic lupus erythematosus cells	Inner cell mass
iPS	Reprogrammed type 1,2 diabetes cells	Inner cell mass	4
iPS	Reprogrammed Usher syndrome cells	Inner cell mass
iPS	Reprogrammed Williams-Beuren syndrome cells	Inner cell mass
iPS	Reprogrammed Wilson’s disease cells	Inner cell mass
iPS	UTF1	Inner cell mass
Primary	Adult dermal fibroblasts	Fibroblast
Primary	Adult human kidney epithelial cells	Epithelial Cells, Kidney	7
Primary	Adult liver progenitor cells	Epithelial Cells, Liver	4	1
Primary	Alveolar epithelial cells type II	Epithelial Cells, Lung	3
Primary	Arterial smooth muscle cells	Smooth Muscle	84
Primary	Articular cartilage-derived cells (ChondroCelect®)	Cartilage	4	1
Primary	Articular chondrocyte spheroids (Chondrosphere®)	Cartilage	3	1
Primary	Articular chondrocytes	Cartilage
Primary	Astrocytes	Astrocytes, Brain	1
Primary	Autologous muscle-derived cells	Skeletal Muscle		3
Primary	Cardiosphere-derived cells	Heart	8	2
Primary	Chondrocytes	Cartilage	7	2
Primary	Collagen-producing cells derived from skin fibroblasts	Dermis, Fibroblasts	3	1
Primary	Conjunctival fibroblasts	Eye, Fibroblast	2
Primary	Corneal epithelial cells	Epithelial Cells, Eye	1	1
Primary	Cultured epidermis (JACE®)	Epidermis, Epithelial Cells		1
Primary	Cultured keratinocytes	Epidermis, Epithelial Cells		2
Primary	Dissociated adult kidney tissue cells (AK cells)	Kidney
Primary	Dissociated embryonic kidney tissue cells (EK cells)	Kidney
Primary	Endothelial cells (family)	Endothelium	200	1
Primary	Epithelial cell	Epithelial Cells, Oral Cavity	43	3
Primary	Esophageal keratinocytes	Epithelial Cells, Esophagus	19
Primary	Fetal cardiomyocytes (20 weeks)	Heart
Primary	Fetal Gonadal Stromal Cell	Gonad	8
Primary	Fetal human brain cells	Brain	4
Primary	Fetal liver cells	Liver	23
Primary	Fibroblasts (family)	Fibroblast	17	5
Primary	Hair follicle-derived fibroblasts (RepliCel Tendon-01)	Dermis, Fibroblasts, Hair		1
Primary	HB9::GFP Human embryonic fibroblasts	Fibroblast
Primary	Hepatic stellate cells	Liver	11
Primary	Hepatocytes	Epithelial Cells, Liver	3	2
Primary	Human aortic endothelial cells	Endothelium
Primary	Human bronchial smooth muscle cells	Lung, Smooth Muscle	10
Primary	Human corneal endothelial cells	Endothelium, Eye	6
Primary	Human Dermal Fibroblasts	Dermis, Fibroblasts		1
Primary	Human fetal fibroblasts	Fibroblast
Primary	Human mammary epithelial cells	Breast, Epithelial Cells	8
Primary	Human neonatal dermal fibroblasts (Dermagraft)	Dermis, Fibroblasts	9	1
Primary	Human postnatal fibroblasts	Fibroblast, Skin
Primary	Human umbilical vein endothelial cells	Endothelium	4
Primary	Human umbilical vein endothelial cells (HUVEC)	Endothelium	192
Primary	Immunosuppressive dendritic cells	Blood	3	1
Primary	Juvenile cartilage (NuQu)	Cartilage		1
Primary	Liver cells	Liver		1
Primary	Matrix-induced autologous cultured chondrocytes (MACI®)	Cartilage	3	1
Primary	Maturated and electroporated dendritic cells	Blood	1	1
Primary	Muscle-derived myoblasts	Skeletal Muscle		2
Primary	Myelin-reactive T-cells	Blood	3	1
Primary	Neonatal foreskin fibroblasts	Fibroblasts, Skin
Primary	Neurons	Brain, Neurons	3
Primary	Olfactory ensheathing cells	Brain	2	1
Primary	Ovalbumin speciﬁc type 1 regulatory T- cells (Ovasave®)	Blood	20	1
Primary	Ovarian tissue-dissociated cells (human)	Ovary	13
Primary	Platelets	Blood	7
Primary	Regulatory T cells	Blood	9	1
Primary	Regulatory T lymphocytes	Blood	2	1
Primary	Schwann cells	Schwann Cells, Glial Cells	2	1
Primary	Skin-derived fibroblasts	Fibroblasts		2
Primary	Tenocytes	Tendon & Ligament	9	1
Primary	Umbilical cord blood-derived natural killer cells	Blood	9
Primary	Umbilical tissue-derived cells (CNTO2476)	Umbilical Cord	23	1
Complete	Adipose-derived mesenchymal stem cells combined with allograft bone (AlloStem®)	Adipose, Mesenchymal Stem Cells	6	1
Complete	Adipose-derived stromal cells	Adipose		1
Complete	Adipose-derived stromal vascular fraction and adipocytes (HiQCell)	Adipose	54	1
Complete	Aortic endothelial cells cultured in matrix (VASCUGEL®)	Endothelium	2	1
Complete	Bilayered bioengineered skin substitute (Apligraf®)	Skin	1	1
Complete	Bilayered cell therapy	Skin		1
Complete	Bone marrow-derived mesenchymal stem cells and monocytes (Ixmyelocel-T)	Blood, Bone	10	2
Complete	Bone marrow-derived progenitor cells	Bone	2	2
Complete	Cellular bone matrix containing mesenchymal stem cells (Osteocel Plus)	Bone	2	1
Complete	Chondrocytes embedded in a 3D polymer scaffold (BioSeed®-C)	Cartilage		1
Complete	Cultured cartilage (JACC®)	Cartilage	2	1
Complete	Demineralized bone with osteoprogenitor and adult stem cells (Trinity® Evolution™)	Bone	4	1
Complete	Epidermal keratinocytes (EpiDex®)	Epidermis, Epithelial Cells, Hair	4	1
Complete	Full-thickness skin substitutes	Epidermis, Epithelial Cells	15	1
Complete	Juvenile neocartilage (RevaFlex™)	Cartilage	5	1
Complete	Juvenile neocartilage (RevaFlex™)	Skin		1
Complete	MSC-containing human skin substitute (Grafix)	Skin	29	1
Complete	Neo-Urinary Conduit™	Smooth Muscle	5	1
Complete	Pancreatic islets (cadavers)	Pancreas		1
Complete	Stromal vascular fraction cells	Adipose	5	1
Complete	White blood cell mixture (CureXcell™)	Blood		1

## Sheet: Stemmapper
Cell Lineage	Experiment	Tissue ontology	Organism	Platform
ESC	GSE24530	Embryonic/Induced cells	Homo Sapiens	Affymetrix Human Genome U133 Plus 2.0 Array
ESC	GSE30792	Embryonic/Induced cells	Homo Sapiens	Affymetrix Human Genome U133 Plus 2.0 Array
ESC	GSE32503	Embryonic/Induced cells	Homo Sapiens	Affymetrix Human Genome U133 Plus 2.0 Array
ESC	GSE33789	Embryonic/Induced cells	Homo Sapiens	Affymetrix Human Genome U133 Plus 2.0 Array
ESC	GSE41439	Embryonic/Induced cells	Homo Sapiens	Affymetrix Human Genome U133 Plus 2.0 Array
ESC	GSE42222	Embryonic/Induced cells	Homo Sapiens	Affymetrix Human Genome U133 Plus 2.0 Array
ESC	GSE54886	Embryonic/Induced cells	Homo Sapiens	Affymetrix Human Genome U133 Plus 2.0 Array
ESC	GSE75582	Embryonic/Induced cells	Homo Sapiens	Affymetrix Human Genome U133 Plus 2.0 Array
ESC-Beta cells	GSE40709	Pancreas	Homo Sapiens	Affymetrix Human Genome U133 Plus 2.0 Array
ESC-Cardiomyocyte	GSE79413	Heart	Homo Sapiens	Affymetrix Human Genome U133 Plus 2.0 Array
Haematopoietic progenitor cells	GSE54316	Blood	Homo Sapiens	Affymetrix Human Genome U133 Plus 2.0 Array
Hematopoetic Stem Cells	GSE54316	Blood	Homo Sapiens	Affymetrix Human Genome U133 Plus 2.0 Array
iPSC	GSE75701	Embryonic/Induced cells	Homo Sapiens	Affymetrix Human Genome U133 Plus 2.0 Array
Mesenchymal stem cells	GSE27820	Mesenchyme	Homo Sapiens	Affymetrix Human Genome U133 Plus 2.0 Array
Mesenchymal stem cells	GSE36970	Mesenchyme	Homo Sapiens	Affymetrix Human Genome U133 Plus 2.0 Array
Mesenchymal stem cells	GSE44186	Mesenchyme	Homo Sapiens	Affymetrix Human Genome U133 Plus 2.0 Array
Skin-derived precursors cells	GSE62547	Liver	Homo Sapiens	Affymetrix Human Genome U133 Plus 2.0 Array
Spinal cord	GSE75701	Neural	Homo Sapiens	Affymetrix Human Genome U133 Plus 2.0 Array
Stem cells memory T cells	GSE61697	Blood	Homo Sapiens	Affymetrix Human Genome U133 Plus 2.0 Array

## Sheet: ESCAPE
Cell Type	Gene Name	Gene ID	PubMed Reference Number
HESC	ACTA1	58	19664995
HESC	ACTA2	59	19664995
HESC	ACTB	60	19664995
HESC	ACTC1	70	19664995
HESC	ACTG2	72	19664995
HESC	ACTL6A	86	19664995
HESC	ACTN1	87	19664995
HESC	ACTN1	87	19664995
HESC	ACTN2	88	19664995
HESC	ACTN4	81	19664995
HESC	ACTR1A	10121	19664995
HESC	ACTR1B	10120	19664995
HESC	ACTR2	10097	19664995
HESC	ACTR3	10096	19664995
HESC	ACTR3B	57180	19664995
HESC	ACTR5	79913	19664995
HESC	ACTR6	64431	19664995
HESC	ACTR8	93973	19664995
HESC	ADAMTS1	9510	19664995
HESC	ADAR	103	19664995
HESC	ADAR	103	19664995
HESC	ADD1	118	19664995
HESC	ADD2	119	19664995
HESC	ADD3	120	19664995
HESC	ADFP	123	19664995
HESC	ADH5	128	19664995
HESC	ADI1	55256	19664995
HESC	ADI1	55256	19664995
HESC	ADIPOR1	51094	19664995
HESC	ADNP	23394	19664995
HESC	ADPGK	83440	19664995
HESC	ADPRHL2	54936	19664995
HESC	ADRM1	11047	19664995
HESC	ADSL	158	19664995
HESC	ADSS	159	19664995
HESC	AEBP1	165	19664995
HESC	AEBP2	121536	19664995
HESC	AFAP1	60312	19664995
HESC	AFF4	27125	19664995
HESC	AGGF1	55109	19664995
HESC	AGL	178	19664995
HESC	AGPS	8540	19664995
HESC	AGRN	375790	19664995
HESC	AHCTF1	25909	19664995
HESC	AHCY	191	19664995
HESC	AHCYL2	23382	19664995
HESC	AHDC1	27245	19664995
HESC	AHNAK	79026	19664995
HESC	AHNAK	79026	19664995
HESC	AHNAK	79026	19664995
HESC	AHSA1	10598	19664995
HESC	AIFM1	9131	19664995
HESC	AIM1	202	19664995
HESC	AIP	9049	19664995
HESC	AK1	203	19664995
HESC	AK2	204	19664995
HESC	AK3	50808	19664995
HESC	AK3L1	205	19664995
HESC	AKAP1	8165	19664995
HESC	AKAP11	11215	19664995
HESC	AKAP12	9590	19664995
HESC	AKAP12	9590	19664995
HESC	AKAP13	11214	19664995
HESC	AKAP8	10270	19664995
HESC	AKAP8L	26993	19664995
HESC	AKAP9	10142	19664995
HESC	AKR1A1	10327	19664995
HESC	AKR1B1	231	19664995
HESC	AKT1S1	84335	19664995
HESC	ALAS2	212	19664995
HESC	ALB	213	19664995
HESC	ALDH18A1	5832	19664995
HESC	ALDH1A2	8854	19664995
HESC	ALDH1A3	220	19664995
HESC	ALDH3A2	224	19664995
HESC	ALDH7A1	501	19664995
HESC	ALDH9A1	223	19664995
HESC	ALDOA	226	19664995
HESC	ALDOC	230	19664995
HESC	ALG2	85365	19664995
HESC	ALG2	85365	19664995
HESC	ALK	238	19664995
HESC	ALKBH5	54890	19664995
HESC	ALPL	249	19664995
HESC	ALS2	57679	19664995
HESC	ALS2CR13	150864	19664995
HESC	AMBRA1	55626	19664995
HESC	AMBRA1	55626	19664995
HESC	AMDHD2	51005	19664995
HESC	AMPD2	271	19664995
HESC	ANAPC1	64682	19664995
HESC	ANAPC2	29882	19664995
HESC	ANAPC4	29945	19664995
HESC	ANAPC5	51433	19664995
HESC	ANAPC7	51434	19664995
HESC	ANK1	286	19664995
HESC	ANK3	288	19664995
HESC	ANKHD1-EIF4EBP3	404734	19664995
HESC	ANKIB1	54467	19664995
HESC	ANKRD11	29123	19664995
HESC	ANKRD17	26057	19664995
HESC	ANKRD28	23243	19664995
HESC	ANKRD30A	91074	19664995
HESC	ANKRD40	91369	19664995
HESC	ANKRD5	63926	19664995
HESC	ANKRD57	65124	19664995
HESC	ANKS1A	23294	19664995
HESC	ANKZF1	55139	19664995
HESC	ANLN	54443	19664995
HESC	ANP32A	8125	19664995
HESC	ANP32B	10541	19664995
HESC	ANP32C	23520	19664995
HESC	ANP32E	81611	19664995
HESC	ANXA1	301	19664995
HESC	ANXA11	311	19664995
HESC	ANXA2	302	19664995
HESC	ANXA2P2	304	19664995
HESC	ANXA3	306	19664995
HESC	ANXA5	308	19664995
HESC	ANXA6	309	19664995
HESC	ANXA6	309	19664995
HESC	ANXA7	310	19664995
HESC	AOF2	23028	19664995
HESC	AOF2	23028	19664995
HESC	AP1B1	162	19664995
HESC	AP1B1	162	19664995
HESC	AP1G1	164	19664995
HESC	AP1GBP1	11276	19664995
HESC	AP1M1	8907	19664995
HESC	AP1S1	1174	19664995
HESC	AP1S2	8905	19664995
HESC	AP2A1	160	19664995
HESC	AP2A1	160	19664995
HESC	AP2A2	161	19664995
HESC	AP2M1	1173	19664995
HESC	AP2S1	1175	19664995
HESC	AP3B1	8546	19664995
HESC	AP3D1	8943	19664995
HESC	AP3M1	26985	19664995
HESC	APBA2	321	19664995
HESC	APBB2	323	19664995
HESC	APC2	10297	19664995
HESC	APEH	327	19664995
HESC	APEX1	328	19664995
HESC	API5	8539	19664995
HESC	API5	8539	19664995
HESC	APITD1	378708	19664995
HESC	APLP2	334	19664995
HESC	APOA1	335	19664995
HESC	APOBEC3C	27350	19664995
HESC	APOC3	345	19664995
HESC	APOE	348	19664995
HESC	APOL2	23780	19664995
HESC	APP	351	19664995
HESC	APPL1	26060	19664995
HESC	APRT	353	19664995
HESC	APTX	54840	19664995
HESC	AQR	9716	19664995
HESC	ARCN1	372	19664995
HESC	ARD1A	8260	19664995
HESC	ARF1	375	19664995
HESC	ARF4	378	19664995
HESC	ARF5	381	19664995
HESC	ARF6	382	19664995
HESC	ARFGAP1	55738	19664995
HESC	ARFGAP2	84364	19664995
HESC	ARFGEF1	10565	19664995
HESC	ARFGEF2	10564	19664995
HESC	ARFIP1	27236	19664995
HESC	ARGLU1	55082	19664995
HESC	ARHGAP1	392	19664995
HESC	ARHGAP10	79658	19664995
HESC	ARHGAP17	55114	19664995
HESC	ARHGAP19	84986	19664995
HESC	ARHGAP21	57584	19664995
HESC	ARHGAP22	58504	19664995
HESC	ARHGAP23	57636	19664995
HESC	ARHGAP4	393	19664995
HESC	ARHGDIA	396	19664995
HESC	ARHGDIB	397	19664995
HESC	ARHGEF1	9138	19664995
HESC	ARHGEF10	9639	19664995
HESC	ARHGEF11	9826	19664995
HESC	ARHGEF12	23365	19664995
HESC	ARHGEF16	27237	19664995
HESC	ARHGEF18	23370	19664995
HESC	ARHGEF5	7984	19664995
HESC	ARHGEF6	9459	19664995
HESC	ARHGEF7	8874	19664995
HESC	ARID1A	8289	19664995
HESC	ARID1A	8289	19664995
HESC	ARID1B	57492	19664995
HESC	ARID2	196528	19664995
HESC	ARID2	196528	19664995
HESC	ARID3A	1820	19664995
HESC	ARID3B	10620	19664995
HESC	ARID3B	10620	19664995
HESC	ARID4A	5926	19664995
HESC	ARID4B	51742	19664995
HESC	ARIH1	25820	19664995
HESC	ARL3	403	19664995
HESC	ARL6IP1	23204	19664995
HESC	ARL6IP2	64225	19664995
HESC	ARL6IP5	10550	19664995
HESC	ARL8B	55207	19664995
HESC	ARMC1	55156	19664995
HESC	ARMET	7873	19664995
HESC	ARPC1A	10552	19664995
HESC	ARPC1B	10095	19664995
HESC	ARPC2	10109	19664995
HESC	ARPC2	10109	19664995
HESC	ARPC3	10094	19664995
HESC	ARPC4	10093	19664995
HESC	ARPC5	10092	19664995
HESC	ARPC5L	81873	19664995
HESC	ARPP-19	10776	19664995
HESC	ARRB1	408	19664995
HESC	ARRB2	409	19664995
HESC	ARS2	51593	19664995
HESC	ARSB	411	19664995
HESC	ARVCF	421	19664995
HESC	ASAH1	427	19664995
HESC	ASCC1	51008	19664995
HESC	ASCC1	51008	19664995
HESC	ASCC2	84164	19664995
HESC	ASCC3	10973	19664995
HESC	ASCC3	10973	19664995
HESC	ASCC3L1	23020	19664995
HESC	ASCC3L1	23020	19664995
HESC	ASH2L	9070	19664995
HESC	ASH2L	9070	19664995
HESC	ASL	435	19664995
HESC	ASMTL	8623	19664995
HESC	ASNA1	439	19664995
HESC	ASNS	440	19664995
HESC	ASPH	444	19664995
HESC	ASPH	444	19664995
HESC	ASPSCR1	79058	19664995
HESC	ASXL1	171023	19664995
HESC	ATAD2	29028	19664995
HESC	ATAD5	79915	19664995
HESC	ATE1	11101	19664995
HESC	ATF1	466	19664995
HESC	ATF2	1386	19664995
HESC	ATF7	11016	19664995
HESC	ATF7	11016	19664995
HESC	ATF7IP2	80063	19664995
HESC	ATG2A	23130	19664995
HESC	ATG3	64422	19664995
HESC	ATG4B	23192	19664995
HESC	ATG5	9474	19664995
HESC	ATG7	10533	19664995
HESC	ATIC	471	19664995
HESC	ATL3	25923	19664995
HESC	ATM	472	19664995
HESC	ATN1	1822	19664995
HESC	ATP1A1	476	19664995
HESC	ATP1A2	477	19664995
HESC	ATP1B1	481	19664995
HESC	ATP1B3	483	19664995
HESC	ATP2A1	487	19664995
HESC	ATP2A3	489	19664995
HESC	ATP2C1	27032	19664995
HESC	ATP5A1	498	19664995
HESC	ATP5B	506	19664995
HESC	ATP5C1	509	19664995
HESC	ATP5C1	509	19664995
HESC	ATP5D	513	19664995
HESC	ATP5J	522	19664995
HESC	ATP5O	539	19664995
HESC	ATP6AP2	10159	19664995
HESC	ATP6V0A1	535	19664995
HESC	ATP6V0A2	23545	19664995
HESC	ATP6V0D1	9114	19664995
HESC	ATP6V1A	523	19664995
HESC	ATP6V1B2	526	19664995
HESC	ATP6V1C1	528	19664995
HESC	ATP6V1D	51382	19664995
HESC	ATP6V1E1	529	19664995
HESC	ATP6V1F	9296	19664995
HESC	ATP6V1G1	9550	19664995
HESC	ATP6V1H	51606	19664995
HESC	ATP8A2	51761	19664995
HESC	ATP8B2	57198	19664995
HESC	ATR	545	19664995
HESC	ATRIP	84126	19664995
HESC	ATRX	546	19664995
HESC	ATXN10	25814	19664995
HESC	ATXN2	6311	19664995
HESC	ATXN2L	11273	19664995
HESC	ATXN3	4287	19664995
HESC	ATXN7L3	56970	19664995
HESC	AURKB	9212	19664995
HESC	AZI1	22994	19664995
HESC	B4GALNT3	283358	19664995
HESC	B4GALT4	8702	19664995
HESC	B4GALT5	9334	19664995
HESC	BAG2	9532	19664995
HESC	BAG3	9531	19664995
HESC	BAG3	9531	19664995
HESC	BAG4	9530	19664995
HESC	BAHD1	22893	19664995
HESC	BAIAP2	10458	19664995
HESC	BAIAP2L1	55971	19664995
HESC	BANF1	8815	19664995
HESC	BASP1	10409	19664995
HESC	BAT1	7919	19664995
HESC	BAT1	7919	19664995
HESC	BAT1	7919	19664995
HESC	BAT1	7919	19664995
HESC	BAT2	7916	19664995
HESC	BAT2D1	23215	19664995
HESC	BAT2D1	23215	19664995
HESC	BAT2D1	23215	19664995
HESC	BAT3	7917	19664995
HESC	BAT4	7918	19664995
HESC	BAX	581	19664995
HESC	BAZ1A	11177	19664995
HESC	BAZ1A	11177	19664995
HESC	BAZ1B	9031	19664995
HESC	BAZ2A	11176	19664995
HESC	BBS7	55212	19664995
HESC	BBX	56987	19664995
HESC	BCAM	4059	19664995
HESC	BCAP31	10134	19664995
HESC	BCAR1	9564	19664995
HESC	BCAS2	10286	19664995
HESC	BCAT1	586	19664995
HESC	BCAT1	586	19664995
HESC	BCCIP	56647	19664995
HESC	BCL2L12	83596	19664995
HESC	BCL7A	605	19664995
HESC	BCL9	607	19664995
HESC	BCL9L	283149	19664995
HESC	BCLAF1	9774	19664995
HESC	BCOR	54880	19664995
HESC	BCR	613	19664995
HESC	BET1L	51272	19664995
HESC	BGN	633	19664995
HESC	BICD1	636	19664995
HESC	BICD2	23299	19664995
HESC	BID	637	19664995
HESC	BID	637	19664995
HESC	BIRC4	331	19664995
HESC	BIRC5	332	19664995
HESC	BIRC6	57448	19664995
HESC	BLM	641	19664995
HESC	BLMH	642	19664995
HESC	BLOC1S2	282991	19664995
HESC	BLVRA	644	19664995
HESC	BMP2K	55589	19664995
HESC	BMS1	9790	19664995
HESC	BOLA2	552900	19664995
HESC	BOP1	23246	19664995
HESC	BPTF	2186	19664995
HESC	BRAP	8315	19664995
HESC	BRCC3	79184	19664995
HESC	BRD1	23774	19664995
HESC	BRD1	23774	19664995
HESC	BRD2	6046	19664995
HESC	BRD3	8019	19664995
HESC	BRD4	23476	19664995
HESC	BRD7	29117	19664995
HESC	BRD8	10902	19664995
HESC	BRD8	10902	19664995
HESC	BRD9	65980	19664995
HESC	BRE	9577	19664995
HESC	BRIP1	83990	19664995
HESC	BRMS1	25855	19664995
HESC	BRMS1L	84312	19664995
HESC	BRPF1	7862	19664995
HESC	BRPF3	27154	19664995
HESC	BRWD1	54014	19664995
HESC	BRWD2	55717	19664995
HESC	BSG	682	19664995
HESC	BTAF1	9044	19664995
HESC	BTBD11	121551	19664995
HESC	BTBD12	84464	19664995
HESC	BTBD14A	138151	19664995
HESC	BTBD14B	112939	19664995
HESC	BTF3	689	19664995
HESC	BTF3	689	19664995
HESC	BTF3L4	91408	19664995
HESC	BTNL2	56244	19664995
HESC	BUB1B	701	19664995
HESC	BUB3	9184	19664995
HESC	BUD13	84811	19664995
HESC	BUD31	8896	19664995
HESC	BXDC1	84154	19664995
HESC	BXDC2	55299	19664995
HESC	BXDC5	80135	19664995
HESC	BYSL	705	19664995
HESC	BZRAP1	9256	19664995
HESC	BZW1	9689	19664995
HESC	BZW1L1	151579	19664995
HESC	BZW2	28969	19664995
HESC	C10orf104	119504	19664995
HESC	C10orf118	55088	19664995
HESC	C10orf47	254427	19664995
HESC	C10orf76	79591	19664995
HESC	C10orf81	79949	19664995
HESC	C11orf2	738	19664995
HESC	C11orf30	56946	19664995
HESC	C11orf46	120534	19664995
HESC	C11orf49	79096	19664995
HESC	C11orf58	10944	19664995
HESC	C11orf59	55004	19664995
HESC	C11orf67	28971	19664995
HESC	C12orf10	60314	19664995
HESC	C12orf11	55726	19664995
HESC	C12orf11	55726	19664995
HESC	C12orf29	91298	19664995
HESC	C12orf30	80018	19664995
HESC	C12orf31	84298	19664995
HESC	C12orf35	55196	19664995
HESC	C12orf43	64897	19664995
HESC	C12orf45	121053	19664995
HESC	C12orf45	121053	19664995
HESC	C12orf5	57103	19664995
HESC	C12orf57	113246	19664995
HESC	C13orf3	221150	19664995
HESC	C13orf7	79596	19664995
HESC	C13orf8	283489	19664995
HESC	C14orf102	55051	19664995
HESC	C14orf104	55172	19664995
HESC	C14orf106	55320	19664995
HESC	C14orf115	55237	19664995
HESC	C14orf118	55668	19664995
HESC	C14orf130	55148	19664995
HESC	C14orf130	55148	19664995
HESC	C14orf133	63894	19664995
HESC	C14orf142	84520	19664995
HESC	C14orf156	81892	19664995
HESC	C14orf166	51637	19664995
HESC	C14orf169	79697	19664995
HESC	C14orf172	115708	19664995
HESC	C14orf172	115708	19664995
HESC	C14orf24	283635	19664995
HESC	C14orf4	64207	19664995
HESC	C14orf43	91748	19664995
HESC	C15orf15	51187	19664995
HESC	C15orf23	90417	19664995
HESC	C15orf44	81556	19664995
HESC	C15orf55	256646	19664995
HESC	C16orf35	8131	19664995
HESC	C16orf42	115939	19664995
HESC	C16orf53	79447	19664995
HESC	C16orf61	56942	19664995
HESC	C16orf62	57020	19664995
HESC	C16orf75	116028	19664995
HESC	C17orf39	79018	19664995
HESC	C17orf49	124944	19664995
HESC	C17orf59	54785	19664995
HESC	C17orf71	55181	19664995
HESC	C17orf79	55352	19664995
HESC	C17orf85	55421	19664995
HESC	C17orf85	55421	19664995
HESC	C18orf17	125488	19664995
HESC	C18orf24	220134	19664995
HESC	C18orf25	147339	19664995
HESC	C18orf37	125476	19664995
HESC	C18orf8	29919	19664995
HESC	C19orf10	56005	19664995
HESC	C19orf2	8725	19664995
HESC	C19orf2	8725	19664995
HESC	C19orf2	8725	19664995
HESC	C19orf25	148223	19664995
HESC	C19orf29	58509	19664995
HESC	C19orf43	79002	19664995
HESC	C19orf61	56006	19664995
HESC	C19orf62	29086	19664995
HESC	C1GALT1C1	29071	19664995
HESC	C1orf107	27042	19664995
HESC	C1orf131	128061	19664995
HESC	C1orf144	26099	19664995
HESC	C1orf160	84065	19664995
HESC	C1orf163	65260	19664995
HESC	C1orf181	54680	19664995
HESC	C1orf198	84886	19664995
HESC	C1orf25	81627	19664995
HESC	C1orf31	388753	19664995
HESC	C1orf35	79169	19664995
HESC	C1orf41	51668	19664995
HESC	C1orf52	148423	19664995
HESC	C1orf57	84284	19664995
HESC	C1orf58	148362	19664995
HESC	C1orf77	26097	19664995
HESC	C1orf80	64853	19664995
HESC	C1orf92	149499	19664995
HESC	C1QBP	708	19664995
HESC	C20orf11	54994	19664995
HESC	C20orf112	140688	19664995
HESC	C20orf149	79144	19664995
HESC	C20orf19	55857	19664995
HESC	C20orf20	55257	19664995
HESC	C20orf27	54976	19664995
HESC	C20orf4	25980	19664995
HESC	C20orf43	51507	19664995
HESC	C20orf43	51507	19664995
HESC	C20orf67	63935	19664995
HESC	C20orf69	140849	19664995
HESC	C20orf72	92667	19664995
HESC	C20orf77	58490	19664995
HESC	C21orf33	8209	19664995
HESC	C21orf45	54069	19664995
HESC	C21orf59	56683	19664995
HESC	C21orf66	94104	19664995
HESC	C21orf70	85395	19664995
HESC	C22orf28	51493	19664995
HESC	C22orf30	253143	19664995
HESC	C2CD3	26005	19664995
HESC	C2orf18	54978	19664995
HESC	C2orf43	60526	19664995
HESC	C2orf49	79074	19664995
HESC	C3orf10	55845	19664995
HESC	C3orf17	25871	19664995
HESC	C3orf26	84319	19664995
HESC	C3orf37	56941	19664995
HESC	C3orf59	151963	19664995
HESC	C3orf63	23272	19664995
HESC	C4orf14	84273	19664995
HESC	C4orf15	79441	19664995
HESC	C4orf20	55325	19664995
HESC	C4orf21	55345	19664995
HESC	C4orf27	54969	19664995
HESC	C4orf41	60684	19664995
HESC	C4orf8	8603	19664995
HESC	C5orf21	83989	19664995
HESC	C5orf22	55322	19664995
HESC	C5orf3	10827	19664995
HESC	C5orf42	65250	19664995
HESC	C6orf108	10591	19664995
HESC	C6orf115	58527	19664995
HESC	C6orf130	221443	19664995
HESC	C6orf150	115004	19664995
HESC	C6orf153	88745	19664995
HESC	C6orf166	55122	19664995
HESC	C6orf167	253714	19664995
HESC	C6orf211	79624	19664995
HESC	C6orf32	9750	19664995
HESC	C7orf20	51608	19664995
HESC	C7orf24	79017	19664995
HESC	C7orf26	79034	19664995
HESC	C7orf28A	51622	19664995
HESC	C7orf50	84310	19664995
HESC	C8orf30A	51236	19664995
HESC	C8orf41	80185	19664995
HESC	C8orf42	157695	19664995
HESC	C8orf47	203111	19664995
HESC	C9orf114	51490	19664995
HESC	C9orf114	51490	19664995
HESC	C9orf126	286205	19664995
HESC	C9orf142	286257	19664995
HESC	C9orf16	79095	19664995
HESC	C9orf32	28989	19664995
HESC	C9orf32	28989	19664995
HESC	C9orf58	83543	19664995
HESC	C9orf75	286262	19664995
HESC	C9orf78	51759	19664995
HESC	C9orf78	51759	19664995
HESC	C9orf79	286234	19664995
HESC	C9orf80	58493	19664995
HESC	C9orf82	79886	19664995
HESC	C9orf98	158067	19664995
HESC	CA2	760	19664995
HESC	CAB39	51719	19664995
HESC	CAB39L	81617	19664995
HESC	CABIN1	23523	19664995
HESC	CACHD1	57685	19664995
HESC	CACNA2D1	781	19664995
HESC	CACYBP	27101	19664995
HESC	CAD	790	19664995
HESC	CADM1	23705	19664995
HESC	CALB1	793	19664995
HESC	CALD1	800	19664995
HESC	CALD1	800	19664995
HESC	CALM2	805	19664995
HESC	CALR	811	19664995
HESC	CALR	811	19664995
HESC	CALU	813	19664995
HESC	CALU	813	19664995
HESC	CAMK2D	817	19664995
HESC	CAMK2G	818	19664995
HESC	CAMKK2	10645	19664995
HESC	CAMKV	79012	19664995
HESC	CAMLG	819	19664995
HESC	CAMSAP1L1	23271	19664995
HESC	CAND1	55832	19664995
HESC	CAND2	23066	19664995
HESC	CANX	821	19664995
HESC	CAP1	10487	19664995
HESC	CAP2	10486	19664995
HESC	CAPG	822	19664995
HESC	CAPN1	823	19664995
HESC	CAPN2	824	19664995
HESC	CAPN5	726	19664995
HESC	CAPN6	827	19664995
HESC	CAPNS1	826	19664995
HESC	CAPRIN1	4076	19664995
HESC	CAPZA1	829	19664995
HESC	CAPZA2	830	19664995
HESC	CAPZB	832	19664995
HESC	CAPZB	832	19664995
HESC	CARHSP1	23589	19664995
HESC	CARKL	23729	19664995
HESC	CARM1	10498	19664995
HESC	CARS	833	19664995
HESC	CASC3	22794	19664995
HESC	CASC5	57082	19664995
HESC	CASP3	836	19664995
HESC	CASP6	839	19664995
HESC	CASP8AP2	9994	19664995
HESC	CAST	831	19664995
HESC	CAST	831	19664995
HESC	CAV1	857	19664995
HESC	CBARA1	10367	19664995
HESC	CBFA2T2	9139	19664995
HESC	CBFB	865	19664995
HESC	CBL	867	19664995
HESC	CBLL1	79872	19664995
HESC	CBR1	873	19664995
HESC	CBR3	874	19664995
HESC	CBS	875	19664995
HESC	CBX1	10951	19664995
HESC	CBX2	84733	19664995
HESC	CBX3	11335	19664995
HESC	CBX5	23468	19664995
HESC	CC2D1B	200014	19664995
HESC	CCAR1	55749	19664995
HESC	CCBL1	883	19664995
HESC	CCBL2	56267	19664995
HESC	CCBL2	56267	19664995
HESC	CCDC115	84317	19664995
HESC	CCDC117	150275	19664995
HESC	CCDC12	151903	19664995
HESC	CCDC124	115098	19664995
HESC	CCDC128	129285	19664995
HESC	CCDC131	196441	19664995
HESC	CCDC137	339230	19664995
HESC	CCDC16	91603	19664995
HESC	CCDC17	149483	19664995
HESC	CCDC25	55246	19664995
HESC	CCDC38	120935	19664995
HESC	CCDC47	57003	19664995
HESC	CCDC49	54883	19664995
HESC	CCDC50	152137	19664995
HESC	CCDC53	51019	19664995
HESC	CCDC55	84081	19664995
HESC	CCDC56	28958	19664995
HESC	CCDC58	131076	19664995
HESC	CCDC6	8030	19664995
HESC	CCDC6	8030	19664995
HESC	CCDC68	80323	19664995
HESC	CCDC72	51372	19664995
HESC	CCDC74A	90557	19664995
HESC	CCDC77	84318	19664995
HESC	CCDC8	83987	19664995
HESC	CCDC82	79780	19664995
HESC	CCDC86	79080	19664995
HESC	CCDC88A	55704	19664995
HESC	CCDC89	220388	19664995
HESC	CCDC9	26093	19664995
HESC	CCDC91	55297	19664995
HESC	CCDC92	80212	19664995
HESC	CCDC94	55702	19664995
HESC	CCDC95	283899	19664995
HESC	CCDC97	90324	19664995
HESC	CCDC98	84142	19664995
HESC	CCDC99	54908	19664995
HESC	CCNA2	890	19664995
HESC	CCNB1	891	19664995
HESC	CCNDBP1	23582	19664995
HESC	CCNH	902	19664995
HESC	CCNK	8812	19664995
HESC	CCNK	8812	19664995
HESC	CCNL1	57018	19664995
HESC	CCNL2	81669	19664995
HESC	CCNT1	904	19664995
HESC	CCNT2	905	19664995
HESC	CCNYL1	151195	19664995
HESC	CCS	9973	19664995
HESC	CCT2	10576	19664995
HESC	CCT3	7203	19664995
HESC	CCT4	10575	19664995
HESC	CCT5	22948	19664995
HESC	CCT6A	908	19664995
HESC	CCT7	10574	19664995
HESC	CCT8	10694	19664995
HESC	CD160	11126	19664995
HESC	CD2AP	23607	19664995
HESC	CD2BP2	10421	19664995
HESC	CD320	51293	19664995
HESC	CD3EAP	10849	19664995
HESC	CD3EAP	10849	19664995
HESC	CD44	960	19664995
HESC	CD55	1604	19664995
HESC	CD81	975	19664995
HESC	CD99	4267	19664995
HESC	CDC123	8872	19664995
HESC	CDC16	8881	19664995
HESC	CDC2	983	19664995
HESC	CDC20	991	19664995
HESC	CDC23	8697	19664995
HESC	CDC27	996	19664995
HESC	CDC2L2	728642	19664995
HESC	CDC2L2	728642	19664995
HESC	CDC2L2	728642	19664995
HESC	CDC2L5	8621	19664995
HESC	CDC37	11140	19664995
HESC	CDC37L1	55664	19664995
HESC	CDC40	51362	19664995
HESC	CDC42	998	19664995
HESC	CDC42BPA	8476	19664995
HESC	CDC42BPB	9578	19664995
HESC	CDC42EP1	11135	19664995
HESC	CDC42EP4	23580	19664995
HESC	CDC5L	988	19664995
HESC	CDC6	990	19664995
HESC	CDC73	79577	19664995
HESC	CDCA2	157313	19664995
HESC	CDCA5	113130	19664995
HESC	CDCA8	55143	19664995
HESC	CDH1	999	19664995
HESC	CDH2	1000	19664995
HESC	CDK3	1018	19664995
HESC	CDK5RAP2	55755	19664995
HESC	CDK5RAP3	80279	19664995
HESC	CDK5RAP3	80279	19664995
HESC	CDK7	1022	19664995
HESC	CDK9	1025	19664995
HESC	CDKAL1	54901	19664995
HESC	CDKN2A	1029	19664995
HESC	CDKN2AIP	55602	19664995
HESC	CDKN2AIPNL	91368	19664995
HESC	CDR2	1039	19664995
HESC	CDT1	81620	19664995
HESC	CDV3	55573	19664995
HESC	CDYL	9425	19664995
HESC	CEBPG	1054	19664995
HESC	CEBPZ	10153	19664995
HESC	CECR2	27443	19664995
HESC	CECR2	27443	19664995
HESC	CENPB	1059	19664995
HESC	CENPC1	1060	19664995
HESC	CENPE	1062	19664995
HESC	CENPH	64946	19664995
HESC	CENPM	79019	19664995
HESC	CENPN	55839	19664995
HESC	CENPT	80152	19664995
HESC	CENTD2	116985	19664995
HESC	CENTD2	116985	19664995
HESC	CENTG1	116986	19664995
HESC	CENTG2	116987	19664995
HESC	CENTG3	116988	19664995
HESC	CEP170	9859	19664995
HESC	CEP290	80184	19664995
HESC	CEP57	9702	19664995
HESC	CEP76	79959	19664995
HESC	CETN2	1069	19664995
HESC	CETN3	1070	19664995
HESC	CFDP1	10428	19664995
HESC	CFL1	1072	19664995
HESC	CFL2	1073	19664995
HESC	CGGBP1	8545	19664995
HESC	CGN	57530	19664995
HESC	CGNL1	84952	19664995
HESC	CHAF1A	10036	19664995
HESC	CHAF1A	10036	19664995
HESC	CHAF1B	8208	19664995
HESC	CHCHD3	54927	19664995
HESC	CHCHD4	131474	19664995
HESC	CHCHD5	84269	19664995
HESC	CHCHD5	84269	19664995
HESC	CHCHD8	51287	19664995
HESC	CHD1	1105	19664995
HESC	CHD1L	9557	19664995
HESC	CHD2	1106	19664995
HESC	CHD4	1108	19664995
HESC	CHD6	84181	19664995
HESC	CHD7	55636	19664995
HESC	CHD8	57680	19664995
HESC	CHD8	57680	19664995
HESC	CHEK1	1111	19664995
HESC	CHEK2	11200	19664995
HESC	CHERP	10523	19664995
HESC	CHID1	66005	19664995
HESC	CHM	1121	19664995
HESC	CHMP1A	5119	19664995
HESC	CHMP2A	27243	19664995
HESC	CHMP4B	128866	19664995
HESC	CHMP5	51510	19664995
HESC	CHORDC1	26973	19664995
HESC	CHPT1	56994	19664995
HESC	CHST7	56548	19664995
HESC	CHSY1	22856	19664995
HESC	CHTF18	63922	19664995
HESC	CIAO1	9391	19664995
HESC	CIAPIN1	57019	19664995
HESC	CINP	51550	19664995
HESC	CIP29	84324	19664995
HESC	CIRBP	1153	19664995
HESC	CIRH1A	84916	19664995
HESC	CISD1	55847	19664995
HESC	CIT	11113	19664995
HESC	CIZ1	25792	19664995
HESC	CIZ1	25792	19664995
HESC	CKAP2	26586	19664995
HESC	CKAP4	10970	19664995
HESC	CKAP5	9793	19664995
HESC	CKB	1152	19664995
HESC	CKMT1B	1159	19664995
HESC	CKMT2	1160	19664995
HESC	CKS1B	1163	19664995
HESC	CKS2	1164	19664995
HESC	CLASP1	23332	19664995
HESC	CLASP2	23122	19664995
HESC	CLASP2	23122	19664995
HESC	CLCC1	23155	19664995
HESC	CLDN6	9074	19664995
HESC	CLIC1	1192	19664995
HESC	CLIC4	25932	19664995
HESC	CLINT1	9685	19664995
HESC	CLINT1	9685	19664995
HESC	CLIP1	6249	19664995
HESC	CLIP2	7461	19664995
HESC	CLK1	1195	19664995
HESC	CLK2	1196	19664995
HESC	CLK3	1198	19664995
HESC	CLN5	1203	19664995
HESC	CLNS1A	1207	19664995
HESC	CLP1	10978	19664995
HESC	CLPB	81570	19664995
HESC	CLPP	8192	19664995
HESC	CLPX	10845	19664995
HESC	CLTA	1211	19664995
HESC	CLTA	1211	19664995
HESC	CLTB	1212	19664995
HESC	CLTC	1213	19664995
HESC	CLTCL1	8218	19664995
HESC	CLU	1191	19664995
HESC	CMAS	55907	19664995
HESC	CMBL	134147	19664995
HESC	CMPK1	51727	19664995
HESC	CMTM6	54918	19664995
HESC	CNBP	7555	19664995
HESC	CNBP	7555	19664995
HESC	CNDP2	55748	19664995
HESC	CNDP2	55748	19664995
HESC	CNGA1	1259	19664995
HESC	CNKSR2	22866	19664995
HESC	CNN1	1264	19664995
HESC	CNN2	1265	19664995
HESC	CNN3	1266	19664995
HESC	CNN3	1266	19664995
HESC	CNOT1	23019	19664995
HESC	CNOT10	25904	19664995
HESC	CNOT10	25904	19664995
HESC	CNOT2	4848	19664995
HESC	CNOT3	4849	19664995
HESC	CNOT7	29883	19664995
HESC	CNP	1267	19664995
HESC	CNPY2	10330	19664995
HESC	CNPY2	10330	19664995
HESC	CNPY3	10695	19664995
HESC	CNPY3	10695	19664995
HESC	CNTNAP4	85445	19664995
HESC	COBL	23242	19664995
HESC	COBL	23242	19664995
HESC	COCH	1690	19664995
HESC	COG2	22796	19664995
HESC	COG4	25839	19664995
HESC	COG8	84342	19664995
HESC	COIL	8161	19664995
HESC	COL11A1	1301	19664995
HESC	COL18A1	80781	19664995
HESC	COL1A1	1277	19664995
HESC	COL4A3BP	10087	19664995
HESC	COL5A1	1289	19664995
HESC	COL5A2	1290	19664995
HESC	COL7A1	1294	19664995
HESC	COPA	1314	19664995
HESC	COPB1	1315	19664995
HESC	COPB2	9276	19664995
HESC	COPE	11316	19664995
HESC	COPE	11316	19664995
HESC	COPG2	26958	19664995
HESC	COPS2	9318	19664995
HESC	COPS3	8533	19664995
HESC	COPS4	51138	19664995
HESC	COPS5	10987	19664995
HESC	COPS6	10980	19664995
HESC	COPS7A	50813	19664995
HESC	COPS7B	64708	19664995
HESC	COPS8	10920	19664995
HESC	COPZ1	22818	19664995
HESC	COQ5	84274	19664995
HESC	COQ9	57017	19664995
HESC	CORO1A	11151	19664995
HESC	CORO1B	57175	19664995
HESC	CORO2A	7464	19664995
HESC	CORO6	84940	19664995
HESC	COTL1	23406	19664995
HESC	COX17	10063	19664995
HESC	COX4I1	1327	19664995
HESC	COX4NB	10328	19664995
HESC	COX5A	9377	19664995
HESC	COX6B1	1340	19664995
HESC	CPD	1362	19664995
HESC	CPNE1	8904	19664995
HESC	CPNE3	8895	19664995
HESC	CPOX	1371	19664995
HESC	CPS1	1373	19664995
HESC	CPSF1	29894	19664995
HESC	CPSF2	53981	19664995
HESC	CPSF3	51692	19664995
HESC	CPSF3L	54973	19664995
HESC	CPSF4	10898	19664995
HESC	CPSF6	11052	19664995
HESC	CPVL	54504	19664995
HESC	CRABP1	1381	19664995
HESC	CRABP2	1382	19664995
HESC	CREB1	1385	19664995
HESC	CREBBP	1387	19664995
HESC	CRELD2	79174	19664995
HESC	CRISPLD2	83716	19664995
HESC	CRK	1398	19664995
HESC	CRKL	1399	19664995
HESC	CRKRS	51755	19664995
HESC	CRLF3	51379	19664995
HESC	CRMP1	1400	19664995
HESC	CRNKL1	51340	19664995
HESC	CROCC	9696	19664995
HESC	CROP	51747	19664995
HESC	CRTAC1	55118	19664995
HESC	CRYAB	1410	19664995
HESC	CRYZ	1429	19664995
HESC	CS	1431	19664995
HESC	CSDA	8531	19664995
HESC	CSDE1	7812	19664995
HESC	CSE1L	1434	19664995
HESC	CSNK1A1	1452	19664995
HESC	CSNK1A1	1452	19664995
HESC	CSNK1D	1453	19664995
HESC	CSNK1G3	1456	19664995
HESC	CSNK2A1	1457	19664995
HESC	CSNK2A2	1459	19664995
HESC	CSNK2B	1460	19664995
HESC	CSPP1	79848	19664995
HESC	CSRP1	1465	19664995
HESC	CSRP2	1466	19664995
HESC	CSTB	1476	19664995
HESC	CSTF1	1477	19664995
HESC	CSTF2	1478	19664995
HESC	CSTF2T	23283	19664995
HESC	CSTF3	1479	19664995
HESC	CTA-221G9.4	85379	19664995
HESC	CTBP1	1487	19664995
HESC	CTBP2	1488	19664995
HESC	CTCF	10664	19664995
HESC	CTDP1	9150	19664995
HESC	CTDSPL2	51496	19664995
HESC	CTF8	54921	19664995
HESC	CTGF	1490	19664995
HESC	CTH	1491	19664995
HESC	CTNNA1	1495	19664995
HESC	CTNNA3	29119	19664995
HESC	CTNNAL1	8727	19664995
HESC	CTNNB1	1499	19664995
HESC	CTNNBL1	56259	19664995
HESC	CTNND1	1500	19664995
HESC	CTNND1	1500	19664995
HESC	CTPS	1503	19664995
HESC	CTPS2	56474	19664995
HESC	CTPS2	56474	19664995
HESC	CTSA	5476	19664995
HESC	CTSB	1508	19664995
HESC	CTSC	1075	19664995
HESC	CTSD	1509	19664995
HESC	CTSL1	1514	19664995
HESC	CTSL2	1515	19664995
HESC	CTSZ	1522	19664995
HESC	CTTN	2017	19664995
HESC	CTTNBP2NL	55917	19664995
HESC	CTTNBP2NL	55917	19664995
HESC	CUGBP1	10658	19664995
HESC	CUGBP2	10659	19664995
HESC	CUL1	8454	19664995
HESC	CUL2	8453	19664995
HESC	CUL3	8452	19664995
HESC	CUL4A	8451	19664995
HESC	CUL4B	8450	19664995
HESC	CUTA	51596	19664995
HESC	CUX1	1523	19664995
HESC	CWC15	51503	19664995
HESC	CWF19L1	55280	19664995
HESC	CWF19L2	143884	19664995
HESC	CXADR	1525	19664995
HESC	CXorf15	55787	19664995
HESC	CXorf26	51260	19664995
HESC	CXorf27	25763	19664995
HESC	CXorf38	159013	19664995
HESC	CXXC5	51523	19664995
HESC	CYB5A	1528	19664995
HESC	CYB5B	80777	19664995
HESC	CYB5R2	51700	19664995
HESC	CYB5R4	51167	19664995
HESC	CYCS	54205	19664995
HESC	CYFIP1	23191	19664995
HESC	CYFIP1	23191	19664995
HESC	CYP51A1	1595	19664995
HESC	CYR61	3491	19664995
HESC	DACT1	51339	19664995
HESC	DAD1	1603	19664995
HESC	DAG1	1605	19664995
HESC	DAGLB	221955	19664995
HESC	DAP3	7818	19664995
HESC	DAPK1	1612	19664995
HESC	DAPK3	1613	19664995
HESC	DARS	1615	19664995
HESC	DAXX	1616	19664995
HESC	DAZAP1	26528	19664995
HESC	DBF4	10926	19664995
HESC	DBI	1622	19664995
HESC	DBN1	1627	19664995
HESC	DBNL	28988	19664995
HESC	DBR1	51163	19664995
HESC	DCBLD2	131566	19664995
HESC	DCC1	79075	19664995
HESC	DCD	117159	19664995
HESC	DCI	1632	19664995
HESC	DCLK1	9201	19664995
HESC	DCP1A	55802	19664995
HESC	DCP1B	196513	19664995
HESC	DCPS	28960	19664995
HESC	DCTN1	1639	19664995
HESC	DCTN2	10540	19664995
HESC	DCTN3	11258	19664995
HESC	DCTN4	51164	19664995
HESC	DCUN1D1	54165	19664995
HESC	DCUN1D5	84259	19664995
HESC	DDA1	79016	19664995
HESC	DDAH1	23576	19664995
HESC	DDAH2	23564	19664995
HESC	DDB1	1642	19664995
HESC	DDEF2	8853	19664995
HESC	DDI2	84301	19664995
HESC	DDOST	1650	19664995
HESC	DDT	1652	19664995
HESC	DDX1	1653	19664995
HESC	DDX10	1662	19664995
HESC	DDX17	10521	19664995
HESC	DDX18	8886	19664995
HESC	DDX19A	55308	19664995
HESC	DDX19B	11269	19664995
HESC	DDX20	11218	19664995
HESC	DDX21	9188	19664995
HESC	DDX23	9416	19664995
HESC	DDX24	57062	19664995
HESC	DDX24	57062	19664995
HESC	DDX27	55661	19664995
HESC	DDX31	64794	19664995
HESC	DDX39	10212	19664995
HESC	DDX39	10212	19664995
HESC	DDX39	10212	19664995
HESC	DDX3X	1654	19664995
HESC	DDX3Y	8653	19664995
HESC	DDX4	54514	19664995
HESC	DDX41	51428	19664995
HESC	DDX42	11325	19664995
HESC	DDX46	9879	19664995
HESC	DDX47	51202	19664995
HESC	DDX5	1655	19664995
HESC	DDX50	79009	19664995
HESC	DDX51	317781	19664995
HESC	DDX52	11056	19664995
HESC	DDX54	79039	19664995
HESC	DDX54	79039	19664995
HESC	DDX55	57696	19664995
HESC	DDX55	57696	19664995
HESC	DDX56	54606	19664995
HESC	DDX6	1656	19664995
HESC	DECR2	26063	19664995
HESC	DEK	7913	19664995
HESC	DENR	8562	19664995
HESC	DEPDC1	55635	19664995
HESC	DERA	51071	19664995
HESC	DFFA	1676	19664995
HESC	DFNA5	1687	19664995
HESC	DGCR14	8220	19664995
HESC	DGCR8	54487	19664995
HESC	DGKA	1606	19664995
HESC	DHFR	1719	19664995
HESC	DHRS1	115817	19664995
HESC	DHRS7B	25979	19664995
HESC	DHTKD1	55526	19664995
HESC	DHX15	1665	19664995
HESC	DHX16	8449	19664995
HESC	DHX16	8449	19664995
HESC	DHX29	54505	19664995
HESC	DHX30	22907	19664995
HESC	DHX33	56919	19664995
HESC	DHX36	170506	19664995
HESC	DHX37	57647	19664995
HESC	DHX38	9785	19664995
HESC	DHX57	90957	19664995
HESC	DHX8	1659	19664995
HESC	DIABLO	56616	19664995
HESC	DIAPH1	1729	19664995
HESC	DICER1	23405	19664995
HESC	DIDO1	11083	19664995
HESC	DIDO1	11083	19664995
HESC	DIDO1	11083	19664995
HESC	DIMT1L	27292	19664995
HESC	DIP2B	57609	19664995
HESC	DIS3	22894	19664995
HESC	DIS3	22894	19664995
HESC	DIS3L	115752	19664995
HESC	DKC1	1736	19664995
HESC	DKFZp686D0972	345651	19664995
HESC	DLAT	1737	19664995
HESC	DLC1	10395	19664995
HESC	DLD	1738	19664995
HESC	DLG1	1739	19664995
HESC	DLG1	1739	19664995
HESC	DLG3	1741	19664995
HESC	DLG5	9231	19664995
HESC	DLG7	9787	19664995
HESC	DLGAP4	22839	19664995
HESC	DLK1	8788	19664995
HESC	DLSTP	1744	19664995
HESC	DMAP1	55929	19664995
HESC	DMD	1756	19664995
HESC	DNAJA1	3301	19664995
HESC	DNAJA2	10294	19664995
HESC	DNAJB11	51726	19664995
HESC	DNAJB2	3300	19664995
HESC	DNAJB5	25822	19664995
HESC	DNAJB6	10049	19664995
HESC	DNAJC10	54431	19664995
HESC	DNAJC13	23317	19664995
HESC	DNAJC21	134218	19664995
HESC	DNAJC3	5611	19664995
HESC	DNAJC5	80331	19664995
HESC	DNAJC7	7266	19664995
HESC	DNAJC8	22826	19664995
HESC	DNAJC9	23234	19664995
HESC	DNASE2	1777	19664995
HESC	DND1	373863	19664995
HESC	DNHD2	201625	19664995
HESC	DNM1L	10059	19664995
HESC	DNM2	1785	19664995
HESC	DNM3	26052	19664995
HESC	DNMBP	23268	19664995
HESC	DNMT1	1786	19664995
HESC	DNMT3A	1788	19664995
HESC	DNMT3B	1789	19664995
HESC	DNMT3B	1789	19664995
HESC	DNPEP	23549	19664995
HESC	DNTTIP1	116092	19664995
HESC	DNTTIP2	30836	19664995
HESC	DOCK7	85440	19664995
HESC	DOCK7	85440	19664995
HESC	DOHH	83475	19664995
HESC	DPF2	5977	19664995
HESC	DPH5	51611	19664995
HESC	DPP3	10072	19664995
HESC	DPPA4	55211	19664995
HESC	DPY30	84661	19664995
HESC	DPYD	1806	19664995
HESC	DPYSL2	1808	19664995
HESC	DPYSL3	1809	19664995
HESC	DPYSL4	10570	19664995
HESC	DR1	1810	19664995
HESC	DRAP1	10589	19664995
HESC	DRG1	4733	19664995
HESC	DRG2	1819	19664995
HESC	DSC2	1824	19664995
HESC	DSG1	1828	19664995
HESC	DSG2	1829	19664995
HESC	DSP	1832	19664995
HESC	DST	667	19664995
HESC	DST	667	19664995
HESC	DST	667	19664995
HESC	DST	667	19664995
HESC	DSTN	11034	19664995
HESC	DTD1	92675	19664995
HESC	DTL	51514	19664995
HESC	DTNA	1837	19664995
HESC	DUS3L	56931	19664995
HESC	DUS3L	56931	19664995
HESC	DUSP11	8446	19664995
HESC	DUSP12	11266	19664995
HESC	DUSP19	142679	19664995
HESC	DUSP3	1845	19664995
HESC	DUT	1854	19664995
HESC	DUT	1854	19664995
HESC	DVL2	1856	19664995
HESC	DYNC1H1	1778	19664995
HESC	DYNC1H1	1778	19664995
HESC	DYNC1I2	1781	19664995
HESC	DYNC1LI1	51143	19664995
HESC	DYNC1LI2	1783	19664995
HESC	DYNC2H1	79659	19664995
HESC	DYNLL1	8655	19664995
HESC	DYNLL2	140735	19664995
HESC	DYNLRB1	83658	19664995
HESC	DYNLRB1	83658	19664995
HESC	DYNLRB2	83657	19664995
HESC	DYNLT1	6993	19664995
HESC	DYRK1B	9149	19664995
HESC	DYRK2	8445	19664995
HESC	DYRK3	8444	19664995
HESC	DZIP3	9666	19664995
HESC	E2F4	1874	19664995
HESC	EBNA1BP2	10969	19664995
HESC	EBP	10682	19664995
HESC	ECH1	1891	19664995
HESC	ECHDC1	55862	19664995
HESC	ECHS1	1892	19664995
HESC	EDC3	80153	19664995
HESC	EDC4	23644	19664995
HESC	EDF1	8721	19664995
HESC	EDIL3	10085	19664995
HESC	EEA1	8411	19664995
HESC	EEF1A1	1915	19664995
HESC	EEF1A2	1917	19664995
HESC	EEF1B2	1933	19664995
HESC	EEF1D	1936	19664995
HESC	EEF1D	1936	19664995
HESC	EEF1E1	9521	19664995
HESC	EEF1G	1937	19664995
HESC	EEF2	1938	19664995
HESC	EEF2K	29904	19664995
HESC	EEFSEC	60678	19664995
HESC	EFHA1	221154	19664995
HESC	EFTUD1	79631	19664995
HESC	EFTUD2	9343	19664995
HESC	EHD1	10938	19664995
HESC	EHD2	30846	19664995
HESC	EHD4	30844	19664995
HESC	EHMT1	79813	19664995
HESC	EHMT1	79813	19664995
HESC	EHMT2	10919	19664995
HESC	EIF1	10209	19664995
HESC	EIF1AY	9086	19664995
HESC	EIF1B	10289	19664995
HESC	EIF2A	83939	19664995
HESC	EIF2AK2	5610	19664995
HESC	EIF2AK4	440275	19664995
HESC	EIF2B1	1967	19664995
HESC	EIF2B2	8892	19664995
HESC	EIF2B3	8891	19664995
HESC	EIF2B4	8890	19664995
HESC	EIF2B5	8893	19664995
HESC	EIF2C1	26523	19664995
HESC	EIF2S1	1965	19664995
HESC	EIF2S2	8894	19664995
HESC	EIF2S3	1968	19664995
HESC	EIF3A	8661	19664995
HESC	EIF3B	8662	19664995
HESC	EIF3C	8663	19664995
HESC	EIF3D	8664	19664995
HESC	EIF3E	3646	19664995
HESC	EIF3EIP	51386	19664995
HESC	EIF3F	8665	19664995
HESC	EIF3G	8666	19664995
HESC	EIF3H	8667	19664995
HESC	EIF3I	8668	19664995
HESC	EIF3J	8669	19664995
HESC	EIF3K	27335	19664995
HESC	EIF3M	10480	19664995
HESC	EIF3M	10480	19664995
HESC	EIF4A1	1973	19664995
HESC	EIF4A2	1974	19664995
HESC	EIF4A2	1974	19664995
HESC	EIF4A2	1974	19664995
HESC	EIF4A3	9775	19664995
HESC	EIF4B	1975	19664995
HESC	EIF4B	1975	19664995
HESC	EIF4E	1977	19664995
HESC	EIF4E2	9470	19664995
HESC	EIF4EBP1	1978	19664995
HESC	EIF4EBP2	1979	19664995
HESC	EIF4EBP3	8637	19664995
HESC	EIF4ENIF1	56478	19664995
HESC	EIF4G1	1981	19664995
HESC	EIF4G2	1982	19664995
HESC	EIF4G3	8672	19664995
HESC	EIF4G3	8672	19664995
HESC	EIF4H	7458	19664995
HESC	EIF5	1983	19664995
HESC	EIF5A	1984	19664995
HESC	EIF5A	1984	19664995
HESC	EIF5A2	56648	19664995
HESC	EIF5B	9669	19664995
HESC	EIF6	3692	19664995
HESC	ELAC2	60528	19664995
HESC	ELAVL1	1994	19664995
HESC	ELF1	1997	19664995
HESC	ELF2	1998	19664995
HESC	ELL	8178	19664995
HESC	ELMO2	63916	19664995
HESC	ELP2	55250	19664995
HESC	EMD	2010	19664995
HESC	EME1	146956	19664995
HESC	EMG1	10436	19664995
HESC	EML4	27436	19664995
HESC	ENAH	55740	19664995
HESC	ENAH	55740	19664995
HESC	ENO1	2023	19664995
HESC	ENO1P	2025	19664995
HESC	ENO2	2026	19664995
HESC	ENO3	2027	19664995
HESC	ENOPH1	58478	19664995
HESC	ENOX1	55068	19664995
HESC	ENPP1	5167	19664995
HESC	ENSA	2029	19664995
HESC	ENY2	56943	19664995
HESC	EP300	2033	19664995
HESC	EP400	57634	19664995
HESC	EPB41	2035	19664995
HESC	EPB41L2	2037	19664995
HESC	EPB41L3	23136	19664995
HESC	EPB41L3	23136	19664995
HESC	EPB41L3	23136	19664995
HESC	EPB41L4B	54566	19664995
HESC	EPB41L5	57669	19664995
HESC	EPC2	26122	19664995
HESC	EPHA1	2041	19664995
HESC	EPHA2	1969	19664995
HESC	EPHX1	2052	19664995
HESC	EPN1	29924	19664995
HESC	EPN2	22905	19664995
HESC	EPN2	22905	19664995
HESC	EPPK1	83481	19664995
HESC	EPRS	2058	19664995
HESC	EPS15	2060	19664995
HESC	EPS15L1	58513	19664995
HESC	ERAP1	51752	19664995
HESC	ERBB2	2064	19664995
HESC	ERC1	23085	19664995
HESC	ERCC2	2068	19664995
HESC	ERCC5	2073	19664995
HESC	ERCC6L	54821	19664995
HESC	ERH	2079	19664995
HESC	ERICH1	157697	19664995
HESC	ERLIN2	11160	19664995
HESC	ERO1L	30001	19664995
HESC	ERP29	10961	19664995
HESC	ERRFI1	54206	19664995
HESC	ESCO2	157570	19664995
HESC	ESD	2098	19664995
HESC	ESF1	51575	19664995
HESC	ESPL1	9700	19664995
HESC	ETF1	2107	19664995
HESC	ETV3	2117	19664995
HESC	ETV6	2120	19664995
HESC	EVL	51466	19664995
HESC	EWSR1	2130	19664995
HESC	EXOC1	55763	19664995
HESC	EXOC3	11336	19664995
HESC	EXOC4	60412	19664995
HESC	EXOC7	23265	19664995
HESC	EXOC8	149371	19664995
HESC	EXOSC1	51013	19664995
HESC	EXOSC10	5394	19664995
HESC	EXOSC2	23404	19664995
HESC	EXOSC3	51010	19664995
HESC	EXOSC5	56915	19664995
HESC	EXOSC6	118460	19664995
HESC	EXOSC7	23016	19664995
HESC	EXOSC7	23016	19664995
HESC	EXOSC8	11340	19664995
HESC	EXOSC9	5393	19664995
HESC	EYA3	2140	19664995
HESC	EZH2	2146	19664995
HESC	EZR	7430	19664995
HESC	EZR	7430	19664995
HESC	EZR	7430	19664995
HESC	F11R	50848	19664995
HESC	F8	2157	19664995
HESC	F8A1	8263	19664995
HESC	FABP3	2170	19664995
HESC	FABP5	2171	19664995
HESC	FADD	8772	19664995
HESC	FADS2	9415	19664995
HESC	FAF1	11124	19664995
HESC	FAH	2184	19664995
HESC	FAHD2B	151313	19664995
HESC	FAM101B	359845	19664995
HESC	FAM103A1	83640	19664995
HESC	FAM104A	84923	19664995
HESC	FAM107B	83641	19664995
HESC	FAM107B	83641	19664995
HESC	FAM111A	63901	19664995
HESC	FAM111B	374393	19664995
HESC	FAM118B	79607	19664995
HESC	FAM120C	54954	19664995
HESC	FAM127C	441518	19664995
HESC	FAM129A	116496	19664995
HESC	FAM134C	162427	19664995
HESC	FAM136A	84908	19664995
HESC	FAM152A	51029	19664995
HESC	FAM21B	55747	19664995
HESC	FAM21C	253725	19664995
HESC	FAM29A	54801	19664995
HESC	FAM40A	85369	19664995
HESC	FAM40A	85369	19664995
HESC	FAM40A	85369	19664995
HESC	FAM44B	91272	19664995
HESC	FAM49B	51571	19664995
HESC	FAM50A	9130	19664995
HESC	FAM54A	113115	19664995
HESC	FAM54B	56181	19664995
HESC	FAM60A	58516	19664995
HESC	FAM62A	23344	19664995
HESC	FAM64A	54478	19664995
HESC	FAM65A	79567	19664995
HESC	FAM69B	138311	19664995
HESC	FAM76B	143684	19664995
HESC	FAM82B	51115	19664995
HESC	FAM83D	81610	19664995
HESC	FAM83F	113828	19664995
HESC	FAM83G	644815	19664995
HESC	FAM83H	286077	19664995
HESC	FAM91A1	157769	19664995
HESC	FAM96B	51647	19664995
HESC	FAM98A	25940	19664995
HESC	FAM98B	283742	19664995
HESC	FANCD2	2177	19664995
HESC	FANCI	55215	19664995
HESC	FARP1	10160	19664995
HESC	FARSA	2193	19664995
HESC	FARSB	10056	19664995
HESC	FAS	355	19664995
HESC	FASN	2194	19664995
HESC	FAT	2195	19664995
HESC	FAU	2197	19664995
HESC	FBL	2091	19664995
HESC	FBLIM1	54751	19664995
HESC	FBLN1	2192	19664995
HESC	FBN1	2200	19664995
HESC	FBN2	2201	19664995
HESC	FBXL10	84678	19664995
HESC	FBXL11	22992	19664995
HESC	FBXL11	22992	19664995
HESC	FBXL6	26233	19664995
HESC	FBXO2	26232	19664995
HESC	FBXO28	23219	19664995
HESC	FBXO44	93611	19664995
HESC	FBXO45	200933	19664995
HESC	FBXO46	23403	19664995
HESC	FBXW11	23291	19664995
HESC	FCAR	2204	19664995
HESC	FDFT1	2222	19664995
HESC	FDPS	2224	19664995
HESC	FEM1B	10116	19664995
HESC	FEN1	2237	19664995
HESC	FER1L3	26509	19664995
HESC	FER1L6	654463	19664995
HESC	FERMT2	10979	19664995
HESC	FEZ2	9637	19664995
HESC	FGD4	121512	19664995
HESC	FGD5	152273	19664995
HESC	FGD6	55785	19664995
HESC	FGF2	2247	19664995
HESC	FGFR1	2260	19664995
HESC	FGFR1OP	11116	19664995
HESC	FGFR1OP2	26127	19664995
HESC	FH	2271	19664995
HESC	FHL2	2274	19664995
HESC	FHL3	2275	19664995
HESC	FIBP	9158	19664995
HESC	FIG4	9896	19664995
HESC	FIP1L1	81608	19664995
HESC	FIP1L1	81608	19664995
HESC	FIS1	51024	19664995
HESC	FKBP10	60681	19664995
HESC	FKBP14	55033	19664995
HESC	FKBP2	2286	19664995
HESC	FKBP3	2287	19664995
HESC	FKBP4	2288	19664995
HESC	FKBP5	2289	19664995
HESC	FKBP8	23770	19664995
HESC	FKBPL	63943	19664995
HESC	FLII	2314	19664995
HESC	FLJ10404	54540	19664995
HESC	FLJ11184	55319	19664995
HESC	FLJ11506	79719	19664995
HESC	FLJ12529	79869	19664995
HESC	FLJ13137	400793	19664995
HESC	FLJ13197	79667	19664995
HESC	FLJ16686	401124	19664995
HESC	FLJ20309	54891	19664995
HESC	FLJ20323	54468	19664995
HESC	FLJ20518	647476	19664995
HESC	FLJ21062	79846	19664995
HESC	FLJ22662	79887	19664995
HESC	FLJ39660	284992	19664995
HESC	FLJ43692	445328	19664995
HESC	FLJ44796	401209	19664995
HESC	FLNA	2316	19664995
HESC	FLNA	2316	19664995
HESC	FLNB	2317	19664995
HESC	FLNB	2317	19664995
HESC	FLNC	2318	19664995
HESC	FLOT1	10211	19664995
HESC	FLT1	2321	19664995
HESC	FLVCR1	28982	19664995
HESC	FLYWCH2	114984	19664995
HESC	FMR1	2332	19664995
HESC	FN1	2335	19664995
HESC	FNBP1	23048	19664995
HESC	FNBP1L	54874	19664995
HESC	FNBP4	23360	19664995
HESC	FNDC1	84624	19664995
HESC	FNTA	2339	19664995
HESC	FOXC2	2303	19664995
HESC	FOXD3	27022	19664995
HESC	FOXJ3	22887	19664995
HESC	FOXK1	221937	19664995
HESC	FOXK2	3607	19664995
HESC	FOXP4	116113	19664995
HESC	FRAP1	2475	19664995
HESC	FREM2	341640	19664995
HESC	FRG1	2483	19664995
HESC	FRG1B	284802	19664995
HESC	FRMD8	83786	19664995
HESC	FSCN1	6624	19664995
HESC	FSD1L	83856	19664995
HESC	FSTL1	11167	19664995
HESC	FTL	2512	19664995
HESC	FTSJ3	117246	19664995
HESC	FUBP1	8880	19664995
HESC	FUBP3	8939	19664995
HESC	FUBP3	8939	19664995
HESC	FUCA2	2519	19664995
HESC	FUS	2521	19664995
HESC	FUT9	10690	19664995
HESC	FXC1	26515	19664995
HESC	FXR1	8087	19664995
HESC	FXR1	8087	19664995
HESC	FXR1	8087	19664995
HESC	FXR1	8087	19664995
HESC	FXR2	9513	19664995
HESC	FYTTD1	84248	19664995
HESC	FZD2	2535	19664995
HESC	FZD7	8324	19664995
HESC	G3BP1	10146	19664995
HESC	G3BP2	9908	19664995
HESC	G3BP2	9908	19664995
HESC	G6PD	2539	19664995
HESC	GAA	2548	19664995
HESC	GAB1	2549	19664995
HESC	GABPA	2551	19664995
HESC	GABPB2	2553	19664995
HESC	GADD45GIP1	90480	19664995
HESC	GAK	2580	19664995
HESC	GAL	51083	19664995
HESC	GAL3ST2	64090	19664995
HESC	GALNT1	2589	19664995
HESC	GALNT2	2590	19664995
HESC	GALNT7	51809	19664995
HESC	GANAB	23193	19664995
HESC	GANAB	23193	19664995
HESC	GAP43	2596	19664995
HESC	GAPDH	2597	19664995
HESC	GAPDH	2597	19664995
HESC	GAPVD1	26130	19664995
HESC	GARS	2617	19664995
HESC	GARS	2617	19664995
HESC	GART	2618	19664995
HESC	GATAD1	57798	19664995
HESC	GATAD2A	54815	19664995
HESC	GATAD2B	57459	19664995
HESC	GBA	2629	19664995
HESC	GBA2	57704	19664995
HESC	GBE1	2632	19664995
HESC	GBF1	8729	19664995
HESC	GBP4	115361	19664995
HESC	GC	2638	19664995
HESC	GCA	25801	19664995
HESC	GCC1	79571	19664995
HESC	GCC2	9648	19664995
HESC	GCC2	9648	19664995
HESC	GCDH	2639	19664995
HESC	GCLC	2729	19664995
HESC	GCN1L1	10985	19664995
HESC	GDF3	9573	19664995
HESC	GDI1	2664	19664995
HESC	GDI2	2665	19664995
HESC	GEMIN4	50628	19664995
HESC	GEMIN5	25929	19664995
HESC	GEMIN6	79833	19664995
HESC	GEMIN7	79760	19664995
HESC	GFAP	2670	19664995
HESC	GFER	2671	19664995
HESC	GFM1	85476	19664995
HESC	GFPT1	2673	19664995
HESC	GFPT2	9945	19664995
HESC	GGA3	23163	19664995
HESC	GGH	8836	19664995
HESC	GGNBP2	79893	19664995
HESC	GINS1	9837	19664995
HESC	GINS2	51659	19664995
HESC	GINS3	64785	19664995
HESC	GINS4	84296	19664995
HESC	GIPC1	10755	19664995
HESC	GIT1	28964	19664995
HESC	GIT2	9815	19664995
HESC	GJA1	2697	19664995
HESC	GLA	2717	19664995
HESC	GLB1	2720	19664995
HESC	GLCCI1	113263	19664995
HESC	GLDC	2731	19664995
HESC	GLE1	2733	19664995
HESC	GLG1	2734	19664995
HESC	GLI1	2735	19664995
HESC	GLMN	11146	19664995
HESC	GLO1	2739	19664995
HESC	GLOD4	51031	19664995
HESC	GLRX3	10539	19664995
HESC	GLRX5	51218	19664995
HESC	GLS	2744	19664995
HESC	GLS	2744	19664995
HESC	GLT25D1	79709	19664995
HESC	GLTP	51228	19664995
HESC	GLTSCR1	29998	19664995
HESC	GLTSCR2	29997	19664995
HESC	GLUD1	2746	19664995
HESC	GLUL	2752	19664995
HESC	GMDS	2762	19664995
HESC	GMEB1	10691	19664995
HESC	GMEB2	26205	19664995
HESC	GMFB	2764	19664995
HESC	GMPR2	51292	19664995
HESC	GMPS	8833	19664995
HESC	GNA13	10672	19664995
HESC	GNAI2	2771	19664995
HESC	GNAI3	2773	19664995
HESC	GNAL	2774	19664995
HESC	GNAQ	2776	19664995
HESC	GNAS	2778	19664995
HESC	GNAT2	2780	19664995
HESC	GNAT3	346562	19664995
HESC	GNB1	2782	19664995
HESC	GNB1L	54584	19664995
HESC	GNB2	2783	19664995
HESC	GNB2L1	10399	19664995
HESC	GNB2L1	10399	19664995
HESC	GNB4	59345	19664995
HESC	GNG10	2790	19664995
HESC	GNG2	54331	19664995
HESC	GNG5	2787	19664995
HESC	GNG5P2	347687	19664995
HESC	GNL2	29889	19664995
HESC	GNL3	26354	19664995
HESC	GNL3L	54552	19664995
HESC	GNPAT	8443	19664995
HESC	GNPDA1	10007	19664995
HESC	GNPNAT1	64841	19664995
HESC	GOLGA1	2800	19664995
HESC	GOLGA2	2801	19664995
HESC	GOLGA2	2801	19664995
HESC	GOLGA3	2802	19664995
HESC	GOLGA4	2803	19664995
HESC	GOLGA4	2803	19664995
HESC	GOLGA5	9950	19664995
HESC	GOLGB1	2804	19664995
HESC	GOLIM4	27333	19664995
HESC	GOLM1	51280	19664995
HESC	GOLPH3	64083	19664995
HESC	GOLPH3L	55204	19664995
HESC	GOLT1B	51026	19664995
HESC	GON4L	54856	19664995
HESC	GON4L	54856	19664995
HESC	GOPC	57120	19664995
HESC	GORASP1	64689	19664995
HESC	GORASP2	26003	19664995
HESC	GORASP2	26003	19664995
HESC	GOSR1	9527	19664995
HESC	GOSR1	9527	19664995
HESC	GOSR2	9570	19664995
HESC	GOT1	2805	19664995
HESC	GOT2	2806	19664995
HESC	GPATCH1	55094	19664995
HESC	GPATCH2	55105	19664995
HESC	GPATCH4	54865	19664995
HESC	GPATCH4	54865	19664995
HESC	GPATCH8	23131	19664995
HESC	GPC4	2239	19664995
HESC	GPC6	10082	19664995
HESC	GPI	2821	19664995
HESC	GPKOW	27238	19664995
HESC	GPR107	57720	19664995
HESC	GPR112	139378	19664995
HESC	GPR123	84435	19664995
HESC	GPRASP2	114928	19664995
HESC	GPRIN3	285513	19664995
HESC	GPS1	2873	19664995
HESC	GPSM1	26086	19664995
HESC	GPX1	2876	19664995
HESC	GPX4	2879	19664995
HESC	GRB2	2885	19664995
HESC	GRHL3	57822	19664995
HESC	GRHPR	9380	19664995
HESC	GRIN1	2902	19664995
HESC	GRIPAP1	56850	19664995
HESC	GRLF1	2909	19664995
HESC	GRPEL1	80273	19664995
HESC	GRSF1	2926	19664995
HESC	GRWD1	83743	19664995
HESC	GSDMDC1	79792	19664995
HESC	GSK3A	2931	19664995
HESC	GSK3B	2932	19664995
HESC	GSN	2934	19664995
HESC	GSPT1	2935	19664995
HESC	GSPT2	23708	19664995
HESC	GSR	2936	19664995
HESC	GSTK1	373156	19664995
HESC	GSTO1	9446	19664995
HESC	GSTP1	2950	19664995
HESC	GTF2A1	2957	19664995
HESC	GTF2E1	2960	19664995
HESC	GTF2F1	2962	19664995
HESC	GTF2F2	2963	19664995
HESC	GTF2H1	2965	19664995
HESC	GTF2H2	2966	19664995
HESC	GTF2H4	2968	19664995
HESC	GTF2I	2969	19664995
HESC	GTF3C1	2975	19664995
HESC	GTF3C1	2975	19664995
HESC	GTF3C2	2976	19664995
HESC	GTF3C3	9330	19664995
HESC	GTF3C4	9329	19664995
HESC	GTF3C5	9328	19664995
HESC	GTPBP1	9567	19664995
HESC	GTPBP4	23560	19664995
HESC	GULP1	51454	19664995
HESC	GYG1	2992	19664995
HESC	GYS1	2997	19664995
HESC	H1F0	3005	19664995
HESC	H1FX	8971	19664995
HESC	H2AFV	94239	19664995
HESC	H2AFX	3014	19664995
HESC	H2AFY	9555	19664995
HESC	H2AFY2	55506	19664995
HESC	HABP4	22927	19664995
HESC	HACL1	26061	19664995
HESC	HADH	3033	19664995
HESC	HADHA	3030	19664995
HESC	HADHB	3032	19664995
HESC	HARS	3035	19664995
HESC	HAT1	8520	19664995
HESC	HAX1	10456	19664995
HESC	HBE1	3046	19664995
HESC	HBS1L	10767	19664995
HESC	HBXIP	10542	19664995
HESC	HCFC1	3054	19664995
HESC	HCFC1	3054	19664995
HESC	hCG_15200	339799	19664995
HESC	hCG_16001	647099	19664995
HESC	hCG_1644301	124685	19664995
HESC	hCG_1730474	643376	19664995
HESC	hCG_1790474	643896	19664995
HESC	hCG_18290	644907	19664995
HESC	hCG_1983896	642696	19664995
HESC	hCG_1984468	389672	19664995
HESC	hCG_1988300	728638	19664995
HESC	hCG_2007354	647589	19664995
HESC	hCG_2023776	402562	19664995
HESC	hCG_21078	389435	19664995
HESC	HCN4	10021	19664995
HESC	HDAC1	3065	19664995
HESC	HDAC2	3066	19664995
HESC	HDAC3	8841	19664995
HESC	HDAC6	10013	19664995
HESC	HDAC7A	51564	19664995
HESC	HDAC7A	51564	19664995
HESC	HDDC2	51020	19664995
HESC	HDGF	3068	19664995
HESC	HDGF2	84717	19664995
HESC	HDGFRP3	50810	19664995
HESC	HDLBP	3069	19664995
HESC	HDLBP	3069	19664995
HESC	HEATR1	55127	19664995
HESC	HEATR2	54919	19664995
HESC	HEATR3	55027	19664995
HESC	HEATR5B	54497	19664995
HESC	HEATR6	63897	19664995
HESC	HEBP2	23593	19664995
HESC	HECTD1	25831	19664995
HESC	HECTD3	79654	19664995
HESC	HECW1	23072	19664995
HESC	HELB	92797	19664995
HESC	HELLS	3070	19664995
HESC	HERC2	8924	19664995
HESC	HERC4	26091	19664995
HESC	HERC5	51191	19664995
HESC	HEXA	3073	19664995
HESC	HEXB	3074	19664995
HESC	HEXIM1	10614	19664995
HESC	HEXIM2	124790	19664995
HESC	HGFAC	3083	19664995
HESC	HGS	9146	19664995
HESC	HIBCH	26275	19664995
HESC	HIF1AN	55662	19664995
HESC	HINT1	3094	19664995
HESC	HIP1R	9026	19664995
HESC	HIPK2	28996	19664995
HESC	HIRA	7290	19664995
HESC	HIRIP3	8479	19664995
HESC	HIST1H1A	3024	19664995
HESC	HIST1H1B	3009	19664995
HESC	HIST1H1C	3006	19664995
HESC	HIST1H1D	3007	19664995
HESC	HIST1H1E	3008	19664995
HESC	HIST1H2AA	221613	19664995
HESC	HIST1H2AB	8335	19664995
HESC	HIST1H2APS4	8333	19664995
HESC	HIST1H2BL	8340	19664995
HESC	HIST2H2BA	337875	19664995
HESC	HIST2H2BE	8349	19664995
HESC	HIST2H4A	8370	19664995
HESC	HJURP	55355	19664995
HESC	HK1	3098	19664995
HESC	HK2	3099	19664995
HESC	HK3	3101	19664995
HESC	HLA-A	3105	19664995
HESC	HLA-A	3105	19664995
HESC	HLA-A	3105	19664995
HESC	HLA-A	3105	19664995
HESC	HLA-H	3136	19664995
HESC	HLTF	6596	19664995
HESC	HM13	81502	19664995
HESC	HMBS	3145	19664995
HESC	HMCN1	83872	19664995
HESC	HMG1L10	27126	19664995
HESC	HMG20B	10362	19664995
HESC	HMG4L	128872	19664995
HESC	HMGA1	3159	19664995
HESC	HMGA1	3159	19664995
HESC	HMGA2	8091	19664995
HESC	HMGB2	3148	19664995
HESC	HMGB3	3149	19664995
HESC	HMGCS1	3157	19664995
HESC	HMGN1	3150	19664995
HESC	HMGN2P3	728632	19664995
HESC	HMGN2P6	643872	19664995
HESC	HMGN3	9324	19664995
HESC	HMMR	3161	19664995
HESC	HMOX1	3162	19664995
HESC	HN1	51155	19664995
HESC	HN1L	90861	19664995
HESC	HNRNPA0	10949	19664995
HESC	HNRNPA1	3178	19664995
HESC	HNRNPA1	3178	19664995
HESC	HNRNPA2B1	3181	19664995
HESC	HNRNPA2B1	3181	19664995
HESC	HNRNPC	3183	19664995
HESC	HNRNPC	3183	19664995
HESC	HNRNPL	3191	19664995
HESC	HNRNPR	10236	19664995
HESC	HNRNPR	10236	19664995
HESC	HNRNPU	3192	19664995
HESC	HNRNPU	3192	19664995
HESC	HNRPA3	220988	19664995
HESC	HNRPA3	220988	19664995
HESC	HNRPAB	3182	19664995
HESC	HNRPAB	3182	19664995
HESC	HNRPCL1	343069	19664995
HESC	HNRPD	3184	19664995
HESC	HNRPDL	9987	19664995
HESC	HNRPDL	9987	19664995
HESC	HNRPF	3185	19664995
HESC	HNRPH1	3187	19664995
HESC	HNRPH1	3187	19664995
HESC	HNRPH2	3188	19664995
HESC	HNRPH3	3189	19664995
HESC	HNRPH3	3189	19664995
HESC	HNRPK	3190	19664995
HESC	HNRPK	3190	19664995
HESC	HNRPK	3190	19664995
HESC	HNRPLL	92906	19664995
HESC	HNRPM	4670	19664995
HESC	HNRPUL1	11100	19664995
HESC	HNRPUL2	221092	19664995
HESC	HOMER1	9456	19664995
HESC	HOMER2	9455	19664995
HESC	HOMER2	9455	19664995
HESC	HOOK1	51361	19664995
HESC	HOOK3	84376	19664995
HESC	HPCAL1	3241	19664995
HESC	HPCAL4	51440	19664995
HESC	HPRT1	3251	19664995
HESC	HRB	3267	19664995
HESC	HRNR	388697	19664995
HESC	HSBP1	3281	19664995
HESC	HSD17B10	3028	19664995
HESC	HSD17B4	3295	19664995
HESC	HSDL2	84263	19664995
HESC	HSDL2	84263	19664995
HESC	HSP90AA1	3320	19664995
HESC	HSP90AA2	3324	19664995
HESC	HSP90AB1	3326	19664995
HESC	HSP90AB1	3326	19664995
HESC	HSP90AB1	3326	19664995
HESC	HSP90AB6P	541611	19664995
HESC	HSP90B1	7184	19664995
HESC	HSPA14	51182	19664995
HESC	HSPA1A	3303	19664995
HESC	HSPA1L	3305	19664995
HESC	HSPA2	3306	19664995
HESC	HSPA4	3308	19664995
HESC	HSPA4L	22824	19664995
HESC	HSPA5	3309	19664995
HESC	HSPA7	3311	19664995
HESC	HSPA8	3312	19664995
HESC	HSPA8	3312	19664995
HESC	HSPA9	3313	19664995
HESC	HSPB1	3315	19664995
HESC	HSPBP1	23640	19664995
HESC	HSPC111	51491	19664995
HESC	HSPC152	51504	19664995
HESC	HSPE1	3336	19664995
HESC	HSPH1	10808	19664995
HESC	HSPH1	10808	19664995
HESC	HTATIP2	10553	19664995
HESC	HTATIP2	10553	19664995
HESC	HTATSF1	27336	19664995
HESC	HTT	3064	19664995
HESC	HUS1	3364	19664995
HESC	HUWE1	10075	19664995
HESC	HUWE1	10075	19664995
HESC	HUWE1	10075	19664995
HESC	HYOU1	10525	19664995
HESC	HYPK	25764	19664995
HESC	IARS	3376	19664995
HESC	IARS	3376	19664995
HESC	IARS	3376	19664995
HESC	ID1	3397	19664995
HESC	IDE	3416	19664995
HESC	IDH1	3417	19664995
HESC	IDH2	3418	19664995
HESC	IDI1	3422	19664995
HESC	IDI2	91734	19664995
HESC	IER3IP1	51124	19664995
HESC	IFITM1	8519	19664995
HESC	IGBP1	3476	19664995
HESC	IGF2BP1	10642	19664995
HESC	IGF2BP2	10644	19664995
HESC	IGF2BP3	10643	19664995
HESC	IGF2BP3	10643	19664995
HESC	IGF2R	3482	19664995
HESC	IGFBP2	3485	19664995
HESC	IGFBP6	3489	19664995
HESC	IGSF6	10261	19664995
HESC	IK	3550	19664995
HESC	IKBKAP	8518	19664995
HESC	IL17RA	23765	19664995
HESC	IL1RAPL1	11141	19664995
HESC	ILF2	3608	19664995
HESC	ILF3	3609	19664995
HESC	ILF3	3609	19664995
HESC	ILF3	3609	19664995
HESC	ILK	3611	19664995
HESC	ILKAP	80895	19664995
HESC	IMP3	55272	19664995
HESC	IMPA1	3612	19664995
HESC	IMPACT	55364	19664995
HESC	IMPDH2	3615	19664995
HESC	INA	9118	19664995
HESC	INADL	10207	19664995
HESC	INADL	10207	19664995
HESC	INCENP	3619	19664995
HESC	ING1	3621	19664995
HESC	ING3	54556	19664995
HESC	ING4	51147	19664995
HESC	INHBB	3625	19664995
HESC	INSRR	3645	19664995
HESC	INTS10	55174	19664995
HESC	INTS12	57117	19664995
HESC	INTS2	57508	19664995
HESC	INTS3	65123	19664995
HESC	INTS5	80789	19664995
HESC	INTS6	26512	19664995
HESC	INTS7	25896	19664995
HESC	INTS9	55756	19664995
HESC	IPO11	51194	19664995
HESC	IPO4	79711	19664995
HESC	IPO7	10527	19664995
HESC	IPO8	10526	19664995
HESC	IPO9	55705	19664995
HESC	IQGAP1	8826	19664995
HESC	IQGAP2	10788	19664995
HESC	IQGAP3	128239	19664995
HESC	IQSEC1	9922	19664995
HESC	IQSEC2	23096	19664995
HESC	IQSEC3	440073	19664995
[truncated: 3,814 more rows]

## Sheet: SKiP Stem Cell_
Cell Lineage	Name	Tissue Ontology	Organism	Accession Number	Disease	Disease Name
iPS Cell	SORMi002-A	Skin	Homo Sapiens	SKIP005558	Normal
ES Cell	NERCe003-A-3	Embryo	Homo Sapiens	SKIP005557	Normal
ES Cell	WAe009-A-23	ES	Homo Sapiens	SKIP005556	Normal→Genome editing	Reporter knock-in
iPS Cell	CSUASOi001-A	Urine	Homo Sapiens	SKIP005555	Diseased	X-linked juvenile retinoschisis
iPS Cell	FDEENTi003-A	Peripheral Blood	Homo Sapiens	SKIP005554	Diseased	Pathological myopia
iPS Cell	SDQLCHi003-A	Peripheral Blood	Homo Sapiens	SKIP005553	Diseased	Short rib-thoracic dysplasia syndrome
iPS Cell	CGMHi001-A	Peripheral Blood	Homo Sapiens	SKIP005552	Diseased	DFNB4, Pendred syndrome
iPS Cell	KSCBi005-A-4	Bone Marrow	Homo Sapiens	SKIP005551	Normal→Genome editing	Xp22.2 Exon
iPS Cell	IMSUTi002-A-1	Skin epidermal keratinocytes	Homo Sapiens	SKIP005549	Diseased	Childhood acute B-lymphoblastic leukemia
iPS Cell	MUSIi006-A	hair follicle keratinocytes	Homo Sapiens	SKIP005548	Normal
iPS Cell	MUSIi011-B	Peripheral Blood T lymphocytes	Homo Sapiens	SKIP005547	Normal
iPS Cell	MUSIi011-A	Peripheral Blood T lymphocytes	Homo Sapiens	SKIP005546	Normal
iPS Cell	NTUHi001-A	Peripheral Blood(Cell Line)	Homo Sapiens	SKIP005545	Diseased	Premature ovarian failure (POF) with Turner's syndrome (TS)
iPS Cell	ZZUi006-A	Skin	Homo Sapiens	SKIP005544	Diseased	Myotonic dystrophy type 1
iPS Cell	HEBHMUi001-A	Skin	Homo Sapiens	SKIP005543	Diseased	Parkinson's disease
iPS Cell	CSi001-A	Peripheral Blood(Cell Line)	Homo Sapiens	SKIP005542	Diseased	Parkinson Disease
iPS Cell	ZZUi0013-A	Skin	Homo Sapiens	SKIP005541	Diseased	Alzheimer's disease
iPS Cell	IBMSi011-A	Peripheral Blood(Cell Line)	Homo Sapiens	SKIP005540	Diseased	Parkinson's disease
iPS Cell	FDEENTi001-A	Peripheral Blood	Homo Sapiens	SKIP005539	Diseased	Pathological myopia
ES Cell	WAe009-A-16	Blastocysts	Homo Sapiens	SKIP005538	Diseased	Fragile X-syndrome
iPS Cell	MUSIi010-A	Skin	Homo Sapiens	SKIP005537	Diseased	Androgenetic alopecia
iPS Cell	FJMUi001-A	Dermal fibroblasts	Homo Sapiens	SKIP005536	Diseased	Hereditary spastic paraplegia (HSP) subtype 76 (SPG76)
iPS Cell	ZZUi0012-A	Skin	Homo Sapiens	SKIP005535	Diseased	Fahr's disease
iPS Cell	IGIBi001-A	Peripheral Blood	Homo Sapiens	SKIP005534	Diseased	Sickle Cell Disease
iPS Cell	ICGi007-A	Peripheral Blood	Homo Sapiens	SKIP005533	Diseased	Huntington's disease
iPS Cell	CiRAi004-A	Peripheral Blood	Homo Sapiens	SKIP005532	Diseased	Angelman syndrome
iPS Cell	Blau-corrected-iPSC	Peripheral Blood	Homo Sapiens	SKIP005531	Diseased→Genome editing	Blau syndrome
iPS Cell	Blau-R334W-iPSC	Peripheral Blood	Homo Sapiens	SKIP005530	Diseased	Blau syndrome
iPS Cell	FUi002-A	Skin fibroblasts	Homo Sapiens	SKIP005529	Diseased	Dravet syndrome
iPS Cell	EBKC-iPSC-MSC	Skin keratinocyte	Homo Sapiens	SKIP005528	Diseased	Recessive dystrophic EB
iPS Cell	KC-iPSC-MSC	Skin keratinocyte	Homo Sapiens	SKIP005527	Normal
iPS Cell	BRCi001-A	Peripheral Blood(Cell Line)	Homo Sapiens	SKIP005526	Diseased	Mucopolysaccharidosis type I
iPS Cell	iMSMD-het.4	Peripheral Blood	Homo Sapiens	SKIP005504	Diseased	Mendelian susceptibility to mycobacterial diseases (MSMD)
iPS Cell	iMSMD-cohet.7	Peripheral Blood	Homo Sapiens	SKIP005503	Diseased	Mendelian susceptibility to mycobacterial diseases (MSMD)
iPS Cell	TauR406W #2	Peripheral Blood	Homo Sapiens	SKIP005502	Diseased	Frontotemporal dementia
iPS Cell	TauR406W #1	Peripheral Blood	Homo Sapiens	SKIP005501	Diseased	Frontotemporal dementia
iPS Cell	yoshima-iPSCs#24	Peripheral Blood	Homo Sapiens	SKIP005500	Normal
iPS Cell	yoshima-iPSCs#23	Peripheral Blood	Homo Sapiens	SKIP005499	Normal
iPS Cell	yoshima-iPSCs#20	Peripheral Blood	Homo Sapiens	SKIP005498	Normal
iPS Cell	yoshima-iPSCs#18	Peripheral Blood	Homo Sapiens	SKIP005497	Normal
iPS Cell	yoshima-iPSCs#14	Peripheral Blood	Homo Sapiens	SKIP005496	Normal
iPS Cell	457C-1	Dental pulp	Homo Sapiens	SKIP005494	Unknown
iPS Cell	454D-1	Dental Pulp	Homo Sapiens	SKIP005493	Unknown
iPS Cell	451F-3	Dental Pulp	Homo Sapiens	SKIP005492	Unknown
iPS Cell	454C-2	Dental Pulp	Homo Sapiens	SKIP005491	Unknown
iPS Cell	454B-1	Dental Pulp	Homo Sapiens	SKIP005490	Unknown
iPS Cell	453F-2	Dental Pulp	Homo Sapiens	SKIP005489	Unknown
iPS Cell	4.54	Dental pulp	Homo Sapiens	SKIP005488	Unknown
iPS Cell	427D-4	Skin	Homo Sapiens	SKIP005487	Normal
iPS Cell	428C-2	Skin	Homo Sapiens	SKIP005486	Normal
Somatic Stem Cell	DFAT	Adipose Tissue	Homo Sapiens	SKIP005485	Normal
iPS Cell	piPS13	Skin	Homo Sapiens	SKIP005484	Diseased	beta-thalassemia
iPS Cell	piPS10	Skin	Homo Sapiens	SKIP005483	Diseased	beta-thalassemia
iPS Cell	piPS7	Skin	Homo Sapiens	SKIP005482	Diseased	beta-thalassemia
iPS Cell	piPS2	Skin	Homo Sapiens	SKIP005481	Diseased	beta-thalassemia
iPS Cell	ALS-iPS2	Skin	Homo Sapiens	SKIP005480	Diseased	Amyotrophic lateral sclerosis
iPS Cell	ALS-iPS1	Skin	Homo Sapiens	SKIP005479	Diseased	Amyotrophic lateral sclerosis
iPS Cell	PD-iPS2	Skin	Homo Sapiens	SKIP005478	Diseased	Parkinson disease
iPS Cell	PD-iPS1	Skin	Homo Sapiens	SKIP005477	Diseased	Parkinson disease
iPS Cell	SMA-iPS2	Skin	Homo Sapiens	SKIP005476	Diseased	Spinal muscular atrophy
iPS Cell	SMA-iPS1	Skin	Homo Sapiens	SKIP005475	Diseased	Spinal muscular atrophy
iPS Cell	GM1T#26	Peripheral Blood	Homo Sapiens	SKIP005472	Diseased	Galloway-Mowat Syndrome
iPS Cell	GM1T#17	Peripheral Blood	Homo Sapiens	SKIP005471	Diseased	Galloway-Mowat Syndrome
iPS Cell	GM1T#27	Peripheral Blood	Homo Sapiens	SKIP005470	Diseased	Galloway-Mowat Syndrome
iPS Cell	Yub1896 XF MSC iPSCs	Skin	Homo Sapiens	SKIP005464	Diseased	extra fingers
iPS Cell	DCM-iPS_lamin A/C mutated-iPSCs	Skin	Homo Sapiens	SKIP005463	Diseased	dilated cardiomyopathy
iPS Cell	HGPS-iPS_lamin A/C mutated-iPSCs	Skin fibroblasts	Homo Sapiens	SKIP005462	Diseased	Hutchinson-Gillford progeria syndrome (HGPS)
iPS Cell	aWS-iPS_lamin A/C mutated-iPSCs	Skin fibroblasts	Homo Sapiens	SKIP005461	Diseased	Werner syndrome
iPS Cell	BR-SP-21-1	Peripheral Blood	Homo Sapiens	SKIP005460	Diseased	Sickle cell anemia Disease
iPS Cell	SA210-1	Peripheral Blood	Homo Sapiens	SKIP005459	Diseased	Sickle cell anemia Disease
iPS Cell	SA82-2	Peripheral Blood	Homo Sapiens	SKIP005458	Diseased	Sickle cell anemia Disease
iPS Cell	SA108	Peripheral Blood	Homo Sapiens	SKIP005457	Diseased	Sickle cell anemia Disease
iPS Cell	iPSCs	Skin	Homo Sapiens	SKIP005456	Normal
iPS Cell	RS2-62P	Skin fibroblast	Homo Sapiens	SKIP005455	Diseased	Rett syndrome
iPS Cell	RS2-65M	Skin fibroblast	Homo Sapiens	SKIP005454	Diseased	Rett syndrome
iPS Cell	RS1-61P	Skin fibroblast	Homo Sapiens	SKIP005453	Diseased	Rett syndrome
iPS Cell	RS1-52M	Skin fibroblast	Homo Sapiens	SKIP005452	Diseased	Rett syndrome
iPS Cell	iPS DF19-9-7T		Homo Sapiens	SKIP005451	Normal
iPS Cell	iPS DF6-9-9T.B		Homo Sapiens	SKIP005450	Normal
iPS Cell	iPS DF4-3-7T.A		Homo Sapiens	SKIP005449	Normal
iPS Cell	iPS DF19-9-11T.H		Homo Sapiens	SKIP005448	Normal
iPS Cell	UCSD240i-APP2-2		Homo Sapiens	SKIP005447	Diseased	Familial Alzheimer Disease (53)
iPS Cell	UCSD241i-APP2-3		Homo Sapiens	SKIP005446	Diseased	Familial Alzheimer Disease (53)
iPS Cell	UCSD239i-APP2-1		Homo Sapiens	SKIP005445	Diseased	Familial Alzheimer Disease (53)
iPS Cell	UCSD237i-APP1-2		Homo Sapiens	SKIP005444	Diseased	Familial Alzheimer Disease (46)
iPS Cell	UCSD238i-APP1-3		Homo Sapiens	SKIP005443	Diseased	Familial Alzheimer Disease (46)
iPS Cell	UCSD236i-APP1-1		Homo Sapiens	SKIP005442	Diseased	Familial Alzheimer Disease (46)
iPS Cell	UCSD234i-SAD2-3		Homo Sapiens	SKIP005441	Diseased	Sporadic Alzheimer Disease (78)
iPS Cell	UCSD235i-SAD2-4		Homo Sapiens	SKIP005440	Diseased	Sporadic Alzheimer Disease (78)
iPS Cell	UCSD232i-SAD2-1		Homo Sapiens	SKIP005439	Diseased	Sporadic Alzheimer Disease (78)
iPS Cell	UCSD233i-SAD2-2		Homo Sapiens	SKIP005438	Diseased	Sporadic Alzheimer Disease (78)
iPS Cell	UCSD230i-SAD1-2		Homo Sapiens	SKIP005437	Diseased	Sporadic Alzheimer Disease (78)
iPS Cell	UCSD231i-SAD1-3		Homo Sapiens	SKIP005436	Diseased	Sporadic Alzheimer Disease (78)
iPS Cell	UCSD229i-SAD1-1		Homo Sapiens	SKIP005435	Diseased	Sporadic Alzheimer Disease (78)
iPS Cell	UCSD226i-NDC2-1		Homo Sapiens	SKIP005434	Normal
iPS Cell	UCSD227i-NDC2-2		Homo Sapiens	SKIP005433	Normal
iPS Cell	UCSD228i-NDC2-3		Homo Sapiens	SKIP005432	Normal
iPS Cell	UCSD225i-NDC1-3		Homo Sapiens	SKIP005431	Normal
iPS Cell	UCSD224i-NDC1-2		Homo Sapiens	SKIP005430	Normal
iPS Cell	UCSD223i-NDC1-1		Homo Sapiens	SKIP005429	Normal
iPS Cell	STAN343i-998C1		Homo Sapiens	SKIP005428	Normal
iPS Cell	STAN342i-994C3		Homo Sapiens	SKIP005427	Normal
iPS Cell	STAN341i-994C1		Homo Sapiens	SKIP005426	Normal
iPS Cell	STAN340i-981C1		Homo Sapiens	SKIP005425	Normal
iPS Cell	STAN338i-975C1		Homo Sapiens	SKIP005424	Normal
iPS Cell	STAN339i-975C3		Homo Sapiens	SKIP005423	Normal
iPS Cell	STAN336i-963C1		Homo Sapiens	SKIP005422	Normal
iPS Cell	STAN337i-963C3		Homo Sapiens	SKIP005421	Normal
iPS Cell	STAN375i-961C1		Homo Sapiens	SKIP005420	Normal
iPS Cell	STAN333i-955C1		Homo Sapiens	SKIP005419	Normal
iPS Cell	STAN334i-955C2		Homo Sapiens	SKIP005418	Normal
iPS Cell	STAN332i-952C5		Homo Sapiens	SKIP005417	Normal
iPS Cell	STAN331i-952C3		Homo Sapiens	SKIP005416	Normal
iPS Cell	STAN330i-949C4		Homo Sapiens	SKIP005415	Normal
iPS Cell	STAN329i-949C3		Homo Sapiens	SKIP005414	Normal
iPS Cell	STAN328i-946C2		Homo Sapiens	SKIP005413	Normal
iPS Cell	STAN327i-940C2		Homo Sapiens	SKIP005412	Normal
iPS Cell	STAN324i-928C6		Homo Sapiens	SKIP005411	Normal
iPS Cell	STAN323i-928C2		Homo Sapiens	SKIP005410	Normal
iPS Cell	STAN322i-924C2		Homo Sapiens	SKIP005409	Normal
iPS Cell	STAN321i-924C1		Homo Sapiens	SKIP005408	Normal
iPS Cell	STAN319i-922C1		Homo Sapiens	SKIP005407	Normal
iPS Cell	STAN318i-910C3		Homo Sapiens	SKIP005406	Normal
iPS Cell	STAN317i-910C2		Homo Sapiens	SKIP005405	Normal
iPS Cell	STAN316i-909C2		Homo Sapiens	SKIP005404	Normal
iPS Cell	STAN315i-909C1		Homo Sapiens	SKIP005403	Normal
iPS Cell	STAN313i-907C1		Homo Sapiens	SKIP005402	Normal
iPS Cell	STAN314i-907C4		Homo Sapiens	SKIP005401	Normal
iPS Cell	STAN311i-906C1		Homo Sapiens	SKIP005400	Normal
iPS Cell	STAN312i-906C3		Homo Sapiens	SKIP005399	Normal
iPS Cell	STAN368i-894C2		Homo Sapiens	SKIP005398	Normal
iPS Cell	STAN367i-894C1		Homo Sapiens	SKIP005397	Normal
iPS Cell	STAN378i-886C4		Homo Sapiens	SKIP005396	Normal
iPS Cell	STAN307i-871C2		Homo Sapiens	SKIP005395	Normal
iPS Cell	STAN308i-871C3		Homo Sapiens	SKIP005394	Normal
iPS Cell	STAN371i-868C5		Homo Sapiens	SKIP005393	Normal
iPS Cell	STAN305i-865C2		Homo Sapiens	SKIP005392	Normal
iPS Cell	STAN306i-865C3		Homo Sapiens	SKIP005391	Normal
iPS Cell	STAN303i-864C2		Homo Sapiens	SKIP005390	Normal
iPS Cell	STAN304i-864C5		Homo Sapiens	SKIP005389	Normal
iPS Cell	STAN348i-851C1		Homo Sapiens	SKIP005388	Normal
iPS Cell	STAN363i-845C5		Homo Sapiens	SKIP005387	Normal
iPS Cell	STAN299i-843C5		Homo Sapiens	SKIP005386	Normal
iPS Cell	STAN300i-843C6		Homo Sapiens	SKIP005385	Normal
iPS Cell	STAN298i-839C5		Homo Sapiens	SKIP005384	Normal
iPS Cell	STAN297i-839C1		Homo Sapiens	SKIP005383	Normal
iPS Cell	STAN296i-836C2		Homo Sapiens	SKIP005382	Normal
iPS Cell	STAN295i-836C1		Homo Sapiens	SKIP005381	Normal
iPS Cell	STAN293i-835C1		Homo Sapiens	SKIP005380	Normal
iPS Cell	STAN294i-835C5		Homo Sapiens	SKIP005379	Normal
iPS Cell	STAN291i-827C1		Homo Sapiens	SKIP005378	Normal
iPS Cell	STAN292i-827C2		Homo Sapiens	SKIP005377	Normal
iPS Cell	STAN287i-810C1		Homo Sapiens	SKIP005376	Normal
iPS Cell	STAN288i-810C3		Homo Sapiens	SKIP005375	Normal
iPS Cell	STAN286i-799C2		Homo Sapiens	SKIP005374	Normal
iPS Cell	STAN379i-783C6		Homo Sapiens	SKIP005373	Normal
iPS Cell	STAN284i-780C1		Homo Sapiens	SKIP005372	Normal
iPS Cell	STAN285i-780C2		Homo Sapiens	SKIP005371	Normal
iPS Cell	STAN283i-771C4		Homo Sapiens	SKIP005370	Normal
iPS Cell	STAN282i-771C3		Homo Sapiens	SKIP005369	Normal
iPS Cell	STAN281i-770C2		Homo Sapiens	SKIP005368	Normal
iPS Cell	STAN280i-770C1		Homo Sapiens	SKIP005367	Normal
iPS Cell	STAN278i-767C2		Homo Sapiens	SKIP005366	Normal
iPS Cell	STAN279i-767C3		Homo Sapiens	SKIP005365	Normal
iPS Cell	STAN349i-762C3		Homo Sapiens	SKIP005364	Normal
iPS Cell	STAN276i-756C4		Homo Sapiens	SKIP005363	Normal
iPS Cell	STAN277i-756C5		Homo Sapiens	SKIP005362	Normal
iPS Cell	STAN275i-732C1		Homo Sapiens	SKIP005361	Normal
iPS Cell	STAN274i-729C2		Homo Sapiens	SKIP005360	Normal
iPS Cell	STAN273i-729C1		Homo Sapiens	SKIP005359	Normal
iPS Cell	STAN272i-726C4		Homo Sapiens	SKIP005358	Normal
iPS Cell	STAN271i-726C3		Homo Sapiens	SKIP005357	Normal
iPS Cell	STAN269i-720C2		Homo Sapiens	SKIP005356	Normal
iPS Cell	STAN270i-720C3		Homo Sapiens	SKIP005355	Normal
iPS Cell	STAN266i-707C4		Homo Sapiens	SKIP005354	Normal
iPS Cell	STAN265i-707C1		Homo Sapiens	SKIP005353	Normal
iPS Cell	STAN264i-703C2		Homo Sapiens	SKIP005352	Normal
iPS Cell	STAN263i-703C1		Homo Sapiens	SKIP005351	Normal
iPS Cell	STAN261i-698C5		Homo Sapiens	SKIP005350	Normal
iPS Cell	STAN350i-694C5		Homo Sapiens	SKIP005349	Normal
iPS Cell	STAN259i-688C1		Homo Sapiens	SKIP005348	Normal
iPS Cell	STAN260i-688C3		Homo Sapiens	SKIP005347	Normal
iPS Cell	STAN258i-685C4		Homo Sapiens	SKIP005346	Normal
iPS Cell	STAN257i-685C3		Homo Sapiens	SKIP005345	Normal
iPS Cell	STAN365i-664C1		Homo Sapiens	SKIP005344	Normal
iPS Cell	STAN381i-652C1		Homo Sapiens	SKIP005343	Normal
iPS Cell	STAN256i-649C2		Homo Sapiens	SKIP005342	Normal
iPS Cell	STAN255i-649C1		Homo Sapiens	SKIP005341	Normal
iPS Cell	STAN253i-647C1		Homo Sapiens	SKIP005340	Normal
iPS Cell	STAN254i-647C3		Homo Sapiens	SKIP005339	Normal
iPS Cell	STAN252i-637C2		Homo Sapiens	SKIP005338	Normal
iPS Cell	STAN251i-637C1		Homo Sapiens	SKIP005337	Normal
iPS Cell	STAN351i-631C1		Homo Sapiens	SKIP005336	Normal
iPS Cell	STAN250i-622C2		Homo Sapiens	SKIP005335	Normal
iPS Cell	STAN248i-617C1		Homo Sapiens	SKIP005334	Normal
iPS Cell	STAN249i-617C2		Homo Sapiens	SKIP005333	Normal
iPS Cell	STAN247i-614C2		Homo Sapiens	SKIP005332	Normal
iPS Cell	STAN245i-601C4		Homo Sapiens	SKIP005331	Normal
iPS Cell	STAN246i-601C5		Homo Sapiens	SKIP005330	Normal
iPS Cell	STAN244i-589C4		Homo Sapiens	SKIP005329	Normal
iPS Cell	STAN243i-589C3		Homo Sapiens	SKIP005328	Normal
iPS Cell	STAN242i-573C2		Homo Sapiens	SKIP005327	Normal
iPS Cell	STAN377i-572C5		Homo Sapiens	SKIP005326	Normal
iPS Cell	STAN374i-565C4		Homo Sapiens	SKIP005325	Normal
iPS Cell	STAN240i-558C3		Homo Sapiens	SKIP005324	Normal
iPS Cell	STAN241i-558C4		Homo Sapiens	SKIP005323	Normal
iPS Cell	STAN239i-553C8		Homo Sapiens	SKIP005322	Normal
iPS Cell	STAN238i-553C5		Homo Sapiens	SKIP005321	Normal
iPS Cell	STAN237i-551C2		Homo Sapiens	SKIP005320	Normal
iPS Cell	STAN236i-551C1		Homo Sapiens	SKIP005319	Normal
iPS Cell	STAN234i-546C1		Homo Sapiens	SKIP005318	Normal
iPS Cell	STAN235i-546C2		Homo Sapiens	SKIP005317	Normal
iPS Cell	STAN233i-541C5		Homo Sapiens	SKIP005316	Normal
iPS Cell	STAN232i-541C2		Homo Sapiens	SKIP005315	Normal
iPS Cell	STAN231i-533C2		Homo Sapiens	SKIP005314	Normal
iPS Cell	STAN230i-533C1		Homo Sapiens	SKIP005313	Normal
iPS Cell	STAN361i-531C6		Homo Sapiens	SKIP005312	Normal
iPS Cell	STAN228i-523C1		Homo Sapiens	SKIP005311	Normal
iPS Cell	STAN229i-523C2		Homo Sapiens	SKIP005310	Normal
iPS Cell	STAN376i-518C2		Homo Sapiens	SKIP005309	Normal
iPS Cell	STAN226i-516C3		Homo Sapiens	SKIP005308	Normal
iPS Cell	STAN227i-516C5		Homo Sapiens	SKIP005307	Normal
iPS Cell	STAN224i-514C3		Homo Sapiens	SKIP005306	Normal
iPS Cell	STAN225i-514C4		Homo Sapiens	SKIP005305	Normal
iPS Cell	STAN222i-509C2		Homo Sapiens	SKIP005304	Normal
iPS Cell	STAN223i-509C3		Homo Sapiens	SKIP005303	Normal
iPS Cell	STAN220i-504C2		Homo Sapiens	SKIP005302	Normal
iPS Cell	STAN219i-501C6		Homo Sapiens	SKIP005301	Normal
iPS Cell	STAN218i-501C5		Homo Sapiens	SKIP005300	Normal
iPS Cell	STAN216i-496C1		Homo Sapiens	SKIP005299	Normal
iPS Cell	STAN217i-496C2		Homo Sapiens	SKIP005298	Normal
iPS Cell	STAN212i-488C2		Homo Sapiens	SKIP005297	Normal
iPS Cell	STAN213i-488C3		Homo Sapiens	SKIP005296	Normal
iPS Cell	STAN211i-475C1		Homo Sapiens	SKIP005295	Normal
iPS Cell	STAN210i-468C1		Homo Sapiens	SKIP005294	Normal
iPS Cell	STAN360i-465C2		Homo Sapiens	SKIP005293	Normal
iPS Cell	STAN209i-460C6		Homo Sapiens	SKIP005292	Normal
iPS Cell	STAN208i-460C2		Homo Sapiens	SKIP005291	Normal
iPS Cell	STAN207i-459C2		Homo Sapiens	SKIP005290	Normal
iPS Cell	STAN206i-459C1		Homo Sapiens	SKIP005289	Normal
iPS Cell	STAN205i-448C2		Homo Sapiens	SKIP005288	Normal
iPS Cell	STAN204i-448C1		Homo Sapiens	SKIP005287	Normal
iPS Cell	STAN203i-445C2		Homo Sapiens	SKIP005286	Normal
iPS Cell	STAN202i-445C1		Homo Sapiens	SKIP005285	Normal
iPS Cell	STAN200i-444C1		Homo Sapiens	SKIP005284	Normal
iPS Cell	STAN201i-444C2		Homo Sapiens	SKIP005283	Normal
iPS Cell	STAN198i-441C2		Homo Sapiens	SKIP005282	Normal
iPS Cell	STAN359i-442C11		Homo Sapiens	SKIP005281	Normal
iPS Cell	STAN192i-429C3		Homo Sapiens	SKIP005280	Normal
iPS Cell	STAN191i-429C2		Homo Sapiens	SKIP005279	Normal
iPS Cell	STAN190i-424C2		Homo Sapiens	SKIP005278	Normal
iPS Cell	STAN187i-420C6		Homo Sapiens	SKIP005277	Normal
iPS Cell	STAN373i-412C4		Homo Sapiens	SKIP005276	Normal
iPS Cell	STAN372i-411C8		Homo Sapiens	SKIP005275	Normal
iPS Cell	STAN182i-410C3		Homo Sapiens	SKIP005274	Normal
iPS Cell	STAN183i-410C4		Homo Sapiens	SKIP005273	Normal
iPS Cell	STAN180i-408C2		Homo Sapiens	SKIP005272	Normal
iPS Cell	STAN181i-408C4		Homo Sapiens	SKIP005271	Normal
iPS Cell	STAN179i-400C2		Homo Sapiens	SKIP005270	Normal
iPS Cell	STAN345i-390C3		Homo Sapiens	SKIP005269	Normal
iPS Cell	STAN175i-373C4		Homo Sapiens	SKIP005268	Normal
iPS Cell	STAN176i-373C6		Homo Sapiens	SKIP005267	Normal
iPS Cell	STAN174i-371C3		Homo Sapiens	SKIP005266	Normal
iPS Cell	STAN173i-368C2		Homo Sapiens	SKIP005265	Normal
iPS Cell	STAN170i-364C3		Homo Sapiens	SKIP005264	Normal
iPS Cell	STAN171i-364C4		Homo Sapiens	SKIP005263	Normal
iPS Cell	STAN168i-358C1		Homo Sapiens	SKIP005262	Normal
iPS Cell	STAN169i-358C4		Homo Sapiens	SKIP005261	Normal
iPS Cell	STAN166i-356C4		Homo Sapiens	SKIP005260	Normal
iPS Cell	STAN167i-356C6		Homo Sapiens	SKIP005259	Normal
iPS Cell	STAN165i-352C5		Homo Sapiens	SKIP005258	Normal
iPS Cell	STAN164i-352C1		Homo Sapiens	SKIP005257	Normal
iPS Cell	STAN163i-345C5		Homo Sapiens	SKIP005256	Normal
iPS Cell	STAN162i-345C2		Homo Sapiens	SKIP005255	Normal
iPS Cell	STAN160i-341C4		Homo Sapiens	SKIP005254	Normal
iPS Cell	STAN161i-341C5		Homo Sapiens	SKIP005253	Normal
iPS Cell	STAN150i-337C1		Homo Sapiens	SKIP005252	Normal
iPS Cell	STAN158i-336C2		Homo Sapiens	SKIP005251	Normal
iPS Cell	STAN159i-336C3		Homo Sapiens	SKIP005250	Normal
iPS Cell	STAN157i-334C2		Homo Sapiens	SKIP005249	Normal
iPS Cell	STAN156i-334C1		Homo Sapiens	SKIP005248	Normal
iPS Cell	STAN155i-313C2		Homo Sapiens	SKIP005247	Normal
iPS Cell	STAN154i-312C1		Homo Sapiens	SKIP005246	Normal
iPS Cell	STAN152i-307C2		Homo Sapiens	SKIP005245	Normal
iPS Cell	STAN153i-307C3		Homo Sapiens	SKIP005244	Normal
iPS Cell	STAN151i-303C3		Homo Sapiens	SKIP005243	Normal
iPS Cell	STAN149i-298C1		Homo Sapiens	SKIP005242	Normal
iPS Cell	STAN357i-298C2		Homo Sapiens	SKIP005241	Normal
iPS Cell	STAN358i-298C3		Homo Sapiens	SKIP005240	Normal
iPS Cell	STAN148i-291C3		Homo Sapiens	SKIP005239	Normal
iPS Cell	STAN146i-286C2		Homo Sapiens	SKIP005238	Normal
iPS Cell	STAN145i-286C1		Homo Sapiens	SKIP005237	Normal
iPS Cell	STAN144i-285C3		Homo Sapiens	SKIP005236	Normal
iPS Cell	STAN366i-282C2		Homo Sapiens	SKIP005235	Normal
iPS Cell	STAN142i-255C1		Homo Sapiens	SKIP005234	Normal
iPS Cell	STAN141i-250C4		Homo Sapiens	SKIP005233	Normal
iPS Cell	STAN140i-243C1		Homo Sapiens	SKIP005232	Normal
iPS Cell	STAN139i-239C5		Homo Sapiens	SKIP005231	Normal
iPS Cell	STAN138i-239C3		Homo Sapiens	SKIP005230	Normal
iPS Cell	STAN137i-231C3		Homo Sapiens	SKIP005229	Normal
iPS Cell	STAN135i-230C1		Homo Sapiens	SKIP005228	Normal
iPS Cell	STAN136i-230C2		Homo Sapiens	SKIP005227	Normal
iPS Cell	STAN134i-215C2		Homo Sapiens	SKIP005226	Normal
iPS Cell	STAN133i-215C1		Homo Sapiens	SKIP005225	Normal
iPS Cell	STAN131i-214C3		Homo Sapiens	SKIP005224	Normal
iPS Cell	STAN132i-214C4		Homo Sapiens	SKIP005223	Normal
iPS Cell	STAN129i-212C2		Homo Sapiens	SKIP005222	Normal
iPS Cell	STAN130i-212C4		Homo Sapiens	SKIP005221	Normal
iPS Cell	STAN128i-211C2		Homo Sapiens	SKIP005220	Normal
iPS Cell	STAN125i-202C2		Homo Sapiens	SKIP005219	Normal
iPS Cell	STAN126i-202C3		Homo Sapiens	SKIP005218	Normal
iPS Cell	STAN122i-193C1		Homo Sapiens	SKIP005217	Normal
iPS Cell	STAN121i-193C2		Homo Sapiens	SKIP005216	Normal
iPS Cell	STAN119i-192C1		Homo Sapiens	SKIP005215	Normal
iPS Cell	STAN120i-192C2		Homo Sapiens	SKIP005214	Normal
iPS Cell	STAN370i-190C3		Homo Sapiens	SKIP005213	Normal
iPS Cell	STAN117i-182C4		Homo Sapiens	SKIP005212	Normal
iPS Cell	STAN118i-182C7		Homo Sapiens	SKIP005211	Normal
iPS Cell	STAN362i-178C1		Homo Sapiens	SKIP005210	Normal
iPS Cell	STAN115i-148C2		Homo Sapiens	SKIP005209	Normal
iPS Cell	STAN116i-148C4		Homo Sapiens	SKIP005208	Normal
iPS Cell	STAN114i-135C2		Homo Sapiens	SKIP005207	Normal
iPS Cell	STAN111i-125C4		Homo Sapiens	SKIP005206	Normal
iPS Cell	STAN108i-123C2		Homo Sapiens	SKIP005205	Normal
iPS Cell	STAN109i-123C3		Homo Sapiens	SKIP005204	Normal
iPS Cell	STAN107i-121C2		Homo Sapiens	SKIP005203	Normal
iPS Cell	STAN106i-121C1		Homo Sapiens	SKIP005202	Normal
iPS Cell	STAN104i-120C3		Homo Sapiens	SKIP005201	Normal
iPS Cell	STAN099i-108C2		Homo Sapiens	SKIP005200	Normal
iPS Cell	STAN100i-108C4		Homo Sapiens	SKIP005199	Normal
iPS Cell	STAN098i-107C4		Homo Sapiens	SKIP005198	Normal
iPS Cell	STAN097i-107C3		Homo Sapiens	SKIP005197	Normal
iPS Cell	STAN095i-102C4		Homo Sapiens	SKIP005196	Normal
iPS Cell	STAN096i-102C6		Homo Sapiens	SKIP005195	Normal
iPS Cell	STAN380i-092C2		Homo Sapiens	SKIP005194	Normal
iPS Cell	STAN369i-088C3		Homo Sapiens	SKIP005193	Normal
iPS Cell	STAN093i-081C1		Homo Sapiens	SKIP005192	Normal
iPS Cell	STAN094i-081C2		Homo Sapiens	SKIP005191	Normal
iPS Cell	STAN091i-071C2		Homo Sapiens	SKIP005190	Normal
iPS Cell	STAN090i-070C4		Homo Sapiens	SKIP005189	Normal
iPS Cell	STAN089i-070C2		Homo Sapiens	SKIP005188	Normal
iPS Cell	STAN088i-060C1		Homo Sapiens	SKIP005187	Normal
iPS Cell	STAN364i-055C2		Homo Sapiens	SKIP005186	Normal
iPS Cell	STAN086i-054C1		Homo Sapiens	SKIP005185	Normal
iPS Cell	STAN087i-054C2		Homo Sapiens	SKIP005184	Normal
iPS Cell	STAN085i-041C3		Homo Sapiens	SKIP005183	Normal
iPS Cell	STAN084i-041C1		Homo Sapiens	SKIP005182	Normal
iPS Cell	STAN083i-024C4		Homo Sapiens	SKIP005181	Normal
iPS Cell	STAN082i-024C1		Homo Sapiens	SKIP005180	Normal
iPS Cell	STAN076i-004C1		Homo Sapiens	SKIP005179	Normal
iPS Cell	STAN077i-004C2		Homo Sapiens	SKIP005178	Normal
iPS Cell	STAN347i-66C3		Homo Sapiens	SKIP005177	Normal
iPS Cell	STAN346i-59C2		Homo Sapiens	SKIP005176	Normal
iPS Cell	dH1f-RiPS-1.5		Homo Sapiens	SKIP005175	Normal
iPS Cell	dH1f-RiPS-1.13		Homo Sapiens	SKIP005174	Normal
iPS Cell	dH1f-RiPS-1.6		Homo Sapiens	SKIP005173	Normal
iPS Cell	dH1f-RiPS-1.14		Homo Sapiens	SKIP005172	Normal
iPS Cell	dH1f-RiPS-1.7		Homo Sapiens	SKIP005171	Normal
iPS Cell	dH1f-RiPS-1.11		Homo Sapiens	SKIP005170	Normal
iPS Cell	dH1f-RiPS-1.2		Homo Sapiens	SKIP005169	Normal
iPS Cell	dH1f-RiPS-1.3		Homo Sapiens	SKIP005168	Normal
iPS Cell	CF-RiPS-1.4		Homo Sapiens	SKIP005167	Diseased	Cystic fibrosis
iPS Cell	CF-RiPS-1.3		Homo Sapiens	SKIP005166	Diseased	Cystic fibrosis
iPS Cell	CF-RiPS-1.2		Homo Sapiens	SKIP005165	Diseased	Cystic fibrosis
iPS Cell	Prader-Willi Syndrome [PWS1-7] Human Induced Pluripotent Stem Cells		Homo Sapiens	SKIP005164	Diseased	Prader-Willi Syndrome
iPS Cell	STAN031i-46-2		Homo Sapiens	SKIP005163	Diseased	Familial pulmonary arterial hypertension
iPS Cell	STAN030i-46-1		Homo Sapiens	SKIP005162	Diseased	Familial pulmonary arterial hypertension
iPS Cell	STAN021i-170-1		Homo Sapiens	SKIP005161	Normal
iPS Cell	STAN022i-170-2		Homo Sapiens	SKIP005160	Normal
iPS Cell	STAN045i-125-1		Homo Sapiens	SKIP005159	Diseased	Associated Pulmonary Arterial Hypertension with Eisenmenger's Syndrome
iPS Cell	STAN046i-125-2		Homo Sapiens	SKIP005158	Diseased	Associated Pulmonary Arterial Hypertension with Eisenmenger's Syndrome
iPS Cell	STAN069i-169-1		Homo Sapiens	SKIP005157	Diseased	Drugs and toxins-associated pulmonary arterial hypertension
iPS Cell	STAN070i-169-2		Homo Sapiens	SKIP005156	Diseased	Drugs and toxins-associated pulmonary arterial hypertension
iPS Cell	STAN073i-180-1		Homo Sapiens	SKIP005155	Diseased	Idiopathic Pulmonary Arterial Hypertension
iPS Cell	STAN074i-180-2		Homo Sapiens	SKIP005154	Diseased	Idiopathic Pulmonary Arterial Hypertension
iPS Cell	STAN020i-177-2		Homo Sapiens	SKIP005153	Diseased	Idiopathic pulmonary arterial hypertension
iPS Cell	STAN019i-177-1		Homo Sapiens	SKIP005152	Diseased	Idiopathic pulmonary arterial hypertension
iPS Cell	STAN072i-179-2		Homo Sapiens	SKIP005151	Diseased	Familial Pulmonary Arterial Hypertension with Drugs and Toxins-Associated history
iPS Cell	STAN071i-179-1		Homo Sapiens	SKIP005150	Diseased	Familial Pulmonary Arterial Hypertension with Drugs and Toxins-Associated history
iPS Cell	STAN017i-171-1		Homo Sapiens	SKIP005149	Diseased	Idiopathic pulmonary arterial hypertension
iPS Cell	STAN018i-171-2		Homo Sapiens	SKIP005148	Diseased	Idiopathic pulmonary arterial hypertension
iPS Cell	STAN016i-178-2		Homo Sapiens	SKIP005147	Diseased	Drugs and toxins-associated pulmonary arterial hypertension
iPS Cell	STAN015i-178-1		Homo Sapiens	SKIP005146	Diseased	Drugs and toxins-associated pulmonary arterial hypertension
iPS Cell	STAN068i-168-2		Homo Sapiens	SKIP005145	Diseased	Idiopathic Pulmonary Arterial Hypertension
iPS Cell	STAN067i-168-1		Homo Sapiens	SKIP005144	Diseased	Idiopathic Pulmonary Arterial Hypertension
iPS Cell	STAN065i-167-1		Homo Sapiens	SKIP005143	Diseased	Idiopathic Pulmonary Arterial Hypertension
iPS Cell	STAN066i-167-2		Homo Sapiens	SKIP005142	Diseased	Idiopathic Pulmonary Arterial Hypertension
iPS Cell	STAN041i-122-1		Homo Sapiens	SKIP005141	Diseased	Associated Pulmonary Arterial Hypertension with s/pand patent ductus arteriosus
iPS Cell	STAN042i-122-2		Homo Sapiens	SKIP005140	Diseased	Associated Pulmonary Arterial Hypertension with s/pand patent ductus arteriosus
iPS Cell	STAN013i-121-1		Homo Sapiens	SKIP005139	Diseased	Idiopathic pulmonary arterial hypertension
iPS Cell	STAN014i-121-2		Homo Sapiens	SKIP005138	Diseased	Idiopathic pulmonary arterial hypertension
iPS Cell	STAN043i-124-1		Homo Sapiens	SKIP005137	Diseased	Associated Pulmonary Arterial Hypertension with ventricular septal defect and Eisenmenger's Syndrome
iPS Cell	STAN044i-124-2		Homo Sapiens	SKIP005136	Diseased	Associated Pulmonary Arterial Hypertension with ventricular septal defect and Eisenmenger's Syndrome
iPS Cell	STAN038i-118-2		Homo Sapiens	SKIP005135	Diseased	Associated Pulmonary Arterial Hypertension with ventricular septal defect and Eisenmenger's Syndrome
iPS Cell	STAN037i-118-1		Homo Sapiens	SKIP005134	Diseased	Associated Pulmonary Arterial Hypertension with ventricular septal defect and Eisenmenger's Syndrome
iPS Cell	STAN012i-123-2		Homo Sapiens	SKIP005133	Diseased	Drugs and toxins-associated pulmonary arterial hypertension
iPS Cell	STAN011i-123-1		Homo Sapiens	SKIP005132	Diseased	Drugs and toxins-associated pulmonary arterial hypertension
iPS Cell	STAN028i-42-1		Homo Sapiens	SKIP005131	Diseased	Idiopathic Pulmonary Arterial Hypertension
iPS Cell	STAN029i-42-2		Homo Sapiens	SKIP005130	Diseased	Idiopathic Pulmonary Arterial Hypertension
iPS Cell	STAN010i-041-2		Homo Sapiens	SKIP005129	Diseased	Idiopathic pulmonary arterial hypertension
iPS Cell	STAN023i-41-1		Homo Sapiens	SKIP005128	Diseased	Idiopathic pulmonary arterial hypertension
iPS Cell	STAN027i-30-2		Homo Sapiens	SKIP005127	Diseased	Associated Pulmonary Arterial Hypertension with pulmonary veno-occlusive disease
iPS Cell	STAN026i-30-1		Homo Sapiens	SKIP005126	Diseased	Associated Pulmonary Arterial Hypertension with pulmonary veno-occlusive disease
iPS Cell	STAN064i-166-2		Homo Sapiens	SKIP005125	Normal
iPS Cell	STAN063i-166-1		Homo Sapiens	SKIP005124	Normal
iPS Cell	STAN008i-165-1		Homo Sapiens	SKIP005123	Normal
iPS Cell	STAN009i-165-2		Homo Sapiens	SKIP005122	Normal
iPS Cell	STAN062i-164-2		Homo Sapiens	SKIP005121	Normal
iPS Cell	STAN061i-164-1		Homo Sapiens	SKIP005120	Normal
iPS Cell	STAN053i-149-1		Homo Sapiens	SKIP005119	Normal
iPS Cell	STAN054i-149-2		Homo Sapiens	SKIP005118	Normal
iPS Cell	STAN006i-148-1		Homo Sapiens	SKIP005117	Normal
iPS Cell	STAN007i-148-2		Homo Sapiens	SKIP005116	Normal
iPS Cell	STAN004i-147-1		Homo Sapiens	SKIP005115	Normal
iPS Cell	STAN005i-147-2		Homo Sapiens	SKIP005114	Normal
iPS Cell	STAN052i-146-2		Homo Sapiens	SKIP005113	Normal
iPS Cell	STAN051i-146-1		Homo Sapiens	SKIP005112	Normal
iPS Cell	STAN048i-126-2		Homo Sapiens	SKIP005111	Normal
iPS Cell	STAN047i-126-1		Homo Sapiens	SKIP005110	Normal
iPS Cell	STAN036i-49-2		Homo Sapiens	SKIP005109	Normal
iPS Cell	STAN035i-49-1		Homo Sapiens	SKIP005108	Normal
iPS Cell	STAN034i-48-2		Homo Sapiens	SKIP005107	Normal
iPS Cell	STAN032i-48-1		Homo Sapiens	SKIP005106	Normal
iPS Cell	STAN040i-119-2		Homo Sapiens	SKIP005105	Diseased	Associated Pulmonary Arterial Hypertension with Lupus and pulmonary fibrosis
iPS Cell	STAN039i-119-1		Homo Sapiens	SKIP005104	Diseased	Associated Pulmonary Arterial Hypertension with Lupus and pulmonary fibrosis
iPS Cell	STAN025i-29-2		Homo Sapiens	SKIP005103	Diseased	Familial pulmonary arterial hypertension
iPS Cell	STAN024i-29-1		Homo Sapiens	SKIP005102	Diseased	Familial pulmonary arterial hypertension
iPS Cell	STAN059i-163-1		Homo Sapiens	SKIP005101	Normal
iPS Cell	STAN060i-163-2		Homo Sapiens	SKIP005100	Normal
iPS Cell	STAN058i-162-2		Homo Sapiens	SKIP005099	Normal
iPS Cell	STAN057i-162-1		Homo Sapiens	SKIP005098	Normal
iPS Cell	STAN003i-161-2		Homo Sapiens	SKIP005097	Normal
iPS Cell	STAN002i-161-1		Homo Sapiens	SKIP005096	Normal
iPS Cell	STAN055i-160-1		Homo Sapiens	SKIP005095	Normal
iPS Cell	STAN056i-160-2		Homo Sapiens	SKIP005094	Normal
iPS Cell	STAN001i-047-1		Homo Sapiens	SKIP005093	Normal
iPS Cell	Penn123i-SV20		Homo Sapiens	SKIP005092	Normal
iPS Cell	Penn078i-SV10		Homo Sapiens	SKIP005091	Normal
iPS Cell	Penn171i-M9-9		Homo Sapiens	SKIP005090	Diseased	Homozygous Familial Hypercholesterolemia (3)
iPS Cell	Penn147i-M9-7		Homo Sapiens	SKIP005089	Diseased	Homozygous Familial Hypercholesterolemia (3)
iPS Cell	Penn156i-M8-2		Homo Sapiens	SKIP005088	Normal
iPS Cell	Penn148i-M8-3		Homo Sapiens	SKIP005087	Normal
iPS Cell	Penn144i-M7-16		Homo Sapiens	SKIP005086	Diseased	Abetalipoproteinemia (9)
iPS Cell	Penn150i-M7-9		Homo Sapiens	SKIP005085	Diseased	Abetalipoproteinemia (9)
iPS Cell	Penn141i-M6-2		Homo Sapiens	SKIP005084	Normal
iPS Cell	Penn160i-M6-6		Homo Sapiens	SKIP005083	Normal
iPS Cell	Penn139i-M5-4		Homo Sapiens	SKIP005082	Diseased	Homozygous Familial Hypercholesterolemia (6)
iPS Cell	Penn167i-M5-3		Homo Sapiens	SKIP005081	Diseased	Homozygous Familial Hypercholesterolemia (6)
iPS Cell	Penn153i-M4-10		Homo Sapiens	SKIP005080	Normal
iPS Cell	Penn163i-M4-4		Homo Sapiens	SKIP005079	Normal
iPS Cell	Penn142i-M3-19		Homo Sapiens	SKIP005078	Normal
iPS Cell	Penn155i-M3-21		Homo Sapiens	SKIP005077	Normal
iPS Cell	Penn157i-M2-6		Homo Sapiens	SKIP005076	Diseased	Tangier Disease (13)
iPS Cell	Penn165i-M2-21		Homo Sapiens	SKIP005075	Diseased	Tangier Disease (13)
iPS Cell	Penn152i-M18-1		Homo Sapiens	SKIP005074	Normal
iPS Cell	Penn154i-M18-2		Homo Sapiens	SKIP005073	Normal
iPS Cell	Penn169i-M17-3		Homo Sapiens	SKIP005072	Diseased	Tangier Disease (27)
iPS Cell	Penn170i-M17-4		Homo Sapiens	SKIP005071	Diseased	Tangier Disease (27)
iPS Cell	Penn168i-M16-1		Homo Sapiens	SKIP005070	Diseased	Homozygous Familial Hypercholesterolemia (7 months)
iPS Cell	Penn145i-M16-2		Homo Sapiens	SKIP005069	Diseased	Homozygous Familial Hypercholesterolemia (7 months)
iPS Cell	Penn172i-M15-10		Homo Sapiens	SKIP005068	Normal
iPS Cell	Penn166i-M15-4		Homo Sapiens	SKIP005067	Normal
iPS Cell	Penn159i-M14-4		Homo Sapiens	SKIP005066	Normal
iPS Cell	Penn162i-M14-11		Homo Sapiens	SKIP005065	Normal
iPS Cell	Penn158i-M12-4		Homo Sapiens	SKIP005064	Normal
iPS Cell	Penn140i-M12-7		Homo Sapiens	SKIP005063	Normal
iPS Cell	Penn164i-M11-1		Homo Sapiens	SKIP005062	Normal
iPS Cell	Penn146i-M11-5		Homo Sapiens	SKIP005061	Normal
iPS Cell	Penn161i-M10-5		Homo Sapiens	SKIP005060	Diseased	Tangier disease (18)
iPS Cell	Penn143i-M10-11		Homo Sapiens	SKIP005059	Diseased	Tangier disease (18)
iPS Cell	Penn151i-M1-5		Homo Sapiens	SKIP005058	Normal
iPS Cell	Penn149i-M1-6		Homo Sapiens	SKIP005057	Normal
iPS Cell	Penn102i-96-1		Homo Sapiens	SKIP005056	Normal
iPS Cell	Penn012i-93-2		Homo Sapiens	SKIP005055	Normal
iPS Cell	Penn037i-90-3		Homo Sapiens	SKIP005054	Normal
iPS Cell	Penn022i-89-1		Homo Sapiens	SKIP005053	Normal
iPS Cell	Penn117i-88-32		Homo Sapiens	SKIP005052	Normal
iPS Cell	Penn001i-87-2		Homo Sapiens	SKIP005051	Normal
iPS Cell	Penn131i-86-3		Homo Sapiens	SKIP005050	Normal
iPS Cell	Penn088i-854-7		Homo Sapiens	SKIP005049	Normal
iPS Cell	Penn016i-821-1		Homo Sapiens	SKIP005048	Normal
iPS Cell	Penn061i-821-2		Homo Sapiens	SKIP005047	Normal
iPS Cell	Penn023i-82-1		Homo Sapiens	SKIP005046	Normal
iPS Cell	Penn109i-802-2		Homo Sapiens	SKIP005045	Normal
iPS Cell	Penn128i-8-4		Homo Sapiens	SKIP005044	Normal
iPS Cell	Penn108i-781-3		Homo Sapiens	SKIP005043	Normal
iPS Cell	Penn130i-78-3		Homo Sapiens	SKIP005042	Normal
iPS Cell	Penn008i-77-5		Homo Sapiens	SKIP005041	Normal
iPS Cell	Penn007i-765-3		Homo Sapiens	SKIP005040	Normal
iPS Cell	Penn085i-76-5		Homo Sapiens	SKIP005039	Normal
iPS Cell	Penn089i-758-4		Homo Sapiens	SKIP005038	Normal
iPS Cell	Penn029i-752-3		Homo Sapiens	SKIP005037	Normal
iPS Cell	Penn106i-75-39		Homo Sapiens	SKIP005036	Normal
iPS Cell	Penn021i-749-4		Homo Sapiens	SKIP005035	Normal
iPS Cell	Penn035i-746-3		Homo Sapiens	SKIP005034	Normal
iPS Cell	Penn013i-72-1		Homo Sapiens	SKIP005033	Normal
iPS Cell	Penn011i-719-2		Homo Sapiens	SKIP005032	Normal
iPS Cell	Penn025i-71-58		Homo Sapiens	SKIP005031	Normal
iPS Cell	Penn068i-697-3		Homo Sapiens	SKIP005030	Normal
iPS Cell	Penn121i-69-1		Homo Sapiens	SKIP005029	Normal
iPS Cell	Penn083i-679-4		Homo Sapiens	SKIP005028	Normal
iPS Cell	Penn015i-668-5		Homo Sapiens	SKIP005027	Normal
iPS Cell	Penn003i-661-4		Homo Sapiens	SKIP005026	Normal
iPS Cell	Penn017i-638-2		Homo Sapiens	SKIP005025	Normal
iPS Cell	Penn028i-637-2		Homo Sapiens	SKIP005024	Normal
iPS Cell	Penn043i-633-3		Homo Sapiens	SKIP005023	Normal
iPS Cell	Penn039i-63-1		Homo Sapiens	SKIP005022	Normal
iPS Cell	Penn122i-627-5		Homo Sapiens	SKIP005021	Normal
iPS Cell	Penn100i-623-3		Homo Sapiens	SKIP005020	Normal
iPS Cell	Penn134i-61-26		Homo Sapiens	SKIP005019	Normal
iPS Cell	Penn080i-603-1		Homo Sapiens	SKIP005018	Normal
iPS Cell	Penn069i-60-1		Homo Sapiens	SKIP005017	Normal
iPS Cell	Penn091i-588-2		Homo Sapiens	SKIP005016	Normal
iPS Cell	Penn020i-588-6		Homo Sapiens	SKIP005015	Normal
iPS Cell	Penn009i-57-52		Homo Sapiens	SKIP005014	Normal
iPS Cell	Penn082i-562-6		Homo Sapiens	SKIP005013	Normal
iPS Cell	Penn092i-560-3		Homo Sapiens	SKIP005012	Normal
iPS Cell	Penn031i-56-1		Homo Sapiens	SKIP005011	Normal
iPS Cell	Penn084i-555-2		Homo Sapiens	SKIP005010	Normal
iPS Cell	Penn059i-555-1		Homo Sapiens	SKIP005009	Normal
iPS Cell	Penn065i-553-2		Homo Sapiens	SKIP005008	Normal
iPS Cell	Penn077i-521-1		Homo Sapiens	SKIP005007	Normal
iPS Cell	Penn044i-51-1		Homo Sapiens	SKIP005006	Normal
iPS Cell	Penn098i-50-18		Homo Sapiens	SKIP005005	Normal
iPS Cell	Penn018i-487-4		Homo Sapiens	SKIP005004	Normal
iPS Cell	Penn010i-486-2		Homo Sapiens	SKIP005003	Normal
iPS Cell	Penn052i-444-2		Homo Sapiens	SKIP005002	Normal
iPS Cell	Penn120i-444-1		Homo Sapiens	SKIP005001	Normal
iPS Cell	Penn002i-442-1		Homo Sapiens	SKIP005000	Normal
iPS Cell	Penn096i-44-4		Homo Sapiens	SKIP004999	Normal
iPS Cell	Penn057i-427-3		Homo Sapiens	SKIP004998	Normal
iPS Cell	Penn066i-427-6		Homo Sapiens	SKIP004997	Normal
iPS Cell	Penn127i-415-1		Homo Sapiens	SKIP004996	Normal
iPS Cell	Penn074i-415-3		Homo Sapiens	SKIP004995	Normal
iPS Cell	Penn048i-41-6		Homo Sapiens	SKIP004994	Normal
iPS Cell	Penn070i-408-1		Homo Sapiens	SKIP004993	Normal
iPS Cell	Penn027i-40-2		Homo Sapiens	SKIP004992	Normal
iPS Cell	Penn110i-389-6		Homo Sapiens	SKIP004991	Normal
iPS Cell	Penn030i-384-4		Homo Sapiens	SKIP004990	Normal
iPS Cell	Penn087i-38-1		Homo Sapiens	SKIP004989	Normal
iPS Cell	Penn024i-370-3		Homo Sapiens	SKIP004988	Normal
iPS Cell	Penn014i-37-3		Homo Sapiens	SKIP004987	Normal
iPS Cell	Penn038i-366-6		Homo Sapiens	SKIP004986	Normal
iPS Cell	Penn076i-361-2		Homo Sapiens	SKIP004985	Normal
iPS Cell	Penn081i-352-4		Homo Sapiens	SKIP004984	Normal
iPS Cell	Penn005i-35-3		Homo Sapiens	SKIP004983	Normal
iPS Cell	Penn105i-342-5		Homo Sapiens	SKIP004982	Normal
iPS Cell	Penn049i-334-8		Homo Sapiens	SKIP004981	Normal
iPS Cell	Penn103i-330-4		Homo Sapiens	SKIP004980	Normal
iPS Cell	Penn079i-33-1		Homo Sapiens	SKIP004979	Normal
iPS Cell	Penn034i-322-1		Homo Sapiens	SKIP004978	Normal
iPS Cell	Penn104i-321-6		Homo Sapiens	SKIP004977	Normal
iPS Cell	Penn115i-316-1		Homo Sapiens	SKIP004976	Normal
iPS Cell	Penn067i-312-1		Homo Sapiens	SKIP004975	Normal
iPS Cell	Penn075i-309-1		Homo Sapiens	SKIP004974	Normal
iPS Cell	Penn135i-30-8		Homo Sapiens	SKIP004973	Normal
iPS Cell	Penn053i-292-3		Homo Sapiens	SKIP004972	Normal
iPS Cell	Penn036i-286-3		Homo Sapiens	SKIP004971	Normal
iPS Cell	Penn058i-285-3		Homo Sapiens	SKIP004970	Normal
iPS Cell	Penn124i-28-3		Homo Sapiens	SKIP004969	Normal
iPS Cell	Penn062i-278-2		Homo Sapiens	SKIP004968	Normal
iPS Cell	Penn086i-278-1		Homo Sapiens	SKIP004967	Normal
iPS Cell	Penn112i-304-6		Homo Sapiens	SKIP004966	Normal
iPS Cell	Penn004i-277-1		Homo Sapiens	SKIP004965	Normal
iPS Cell	Penn046i-271-1		Homo Sapiens	SKIP004964	Normal
iPS Cell	Penn101i-263-39		Homo Sapiens	SKIP004963	Normal
iPS Cell	Penn136i-262-1		Homo Sapiens	SKIP004962	Normal
iPS Cell	Penn042i-258-12		Homo Sapiens	SKIP004961	Normal
iPS Cell	Penn047i-254-60		Homo Sapiens	SKIP004960	Normal
iPS Cell	Penn133i-252-23		Homo Sapiens	SKIP004959	Normal
iPS Cell	Penn045i-25-12		Homo Sapiens	SKIP004958	Normal
iPS Cell	Penn050i-245-10		Homo Sapiens	SKIP004957	Normal
iPS Cell	Penn138i-24-4		Homo Sapiens	SKIP004956	Normal
iPS Cell	Penn125i-233-4		Homo Sapiens	SKIP004955	Normal
iPS Cell	Penn060i-23-1		Homo Sapiens	SKIP004954	Normal
iPS Cell	Penn054i-225-33		Homo Sapiens	SKIP004953	Normal
iPS Cell	Penn111i-222-5		Homo Sapiens	SKIP004952	Normal
iPS Cell	Penn064i-22-2		Homo Sapiens	SKIP004951	Normal
iPS Cell	Penn099i-218-1		Homo Sapiens	SKIP004950	Normal
iPS Cell	Penn071i-216-13		Homo Sapiens	SKIP004949	Normal
iPS Cell	Penn129i-20-14		Homo Sapiens	SKIP004948	Normal
iPS Cell	Penn119i-197-25		Homo Sapiens	SKIP004947	Normal
iPS Cell	Penn072i-187-3		Homo Sapiens	SKIP004946	Normal
iPS Cell	Penn033i-182-2		Homo Sapiens	SKIP004945	Normal
iPS Cell	Penn137i-18-11		Homo Sapiens	SKIP004944	Normal
iPS Cell	Penn041i-177-46		Homo Sapiens	SKIP004943	Normal
iPS Cell	Penn097i-17-1		Homo Sapiens	SKIP004942	Normal
iPS Cell	Penn094i-161-1		Homo Sapiens	SKIP004941	Normal
iPS Cell	Penn093i-16-7		Homo Sapiens	SKIP004940	Normal
iPS Cell	Penn032i-15-5		Homo Sapiens	SKIP004939	Normal
iPS Cell	Penn006i-149-1		Homo Sapiens	SKIP004938	Normal
iPS Cell	Penn107i-145-1		Homo Sapiens	SKIP004937	Normal
iPS Cell	Penn019i-136-2		Homo Sapiens	SKIP004936	Normal
iPS Cell	Penn040i-134-2		Homo Sapiens	SKIP004935	Normal
iPS Cell	Penn073i-133-8		Homo Sapiens	SKIP004934	Normal
iPS Cell	Penn132i-131-5		Homo Sapiens	SKIP004933	Normal
iPS Cell	Penn114i-127-2		Homo Sapiens	SKIP004932	Normal
iPS Cell	Penn113i-126-66		Homo Sapiens	SKIP004931	Normal
iPS Cell	Penn116i-125-16		Homo Sapiens	SKIP004930	Normal
iPS Cell	Penn026i-124-1		Homo Sapiens	SKIP004929	Normal
iPS Cell	Penn095i-123-7		Homo Sapiens	SKIP004928	Normal
iPS Cell	Penn126i-120-1		Homo Sapiens	SKIP004927	Normal
iPS Cell	Penn063i-114-1		Homo Sapiens	SKIP004926	Normal
iPS Cell	Penn118i-113-2		Homo Sapiens	SKIP004925	Normal
iPS Cell	Penn090i-111-4		Homo Sapiens	SKIP004924	Normal
iPS Cell	Penn051i-108-1		Homo Sapiens	SKIP004923	Normal
iPS Cell	Penn055i-106-2		Homo Sapiens	SKIP004922	Normal
iPS Cell	Penn056i-1-1		Homo Sapiens	SKIP004921	Normal
iPS Cell	NYSCF-PD-1040-10001.198.01-Skin-SV-iPSC4		Homo Sapiens	SKIP004920	Diseased	Parkinson Disease
iPS Cell	NYSCF-PD-1040-10001.198.01-Skin-SV-iPSC5		Homo Sapiens	SKIP004919	Diseased	Parkinson Disease
iPS Cell	NYSCF-PD-1039-10001.197.01-Skin-SV-iPSC5		Homo Sapiens	SKIP004918	Normal
iPS Cell	NYSCF-PD-1039-10001.197.01-Skin-SV-iPSC2		Homo Sapiens	SKIP004917	Normal
iPS Cell	NYSCF-PD-1030-10001.130.01-Skin-SV-iPSC7		Homo Sapiens	SKIP004916	Normal
iPS Cell	NYSCF-MS-1019-10006-115-Skin-mi-iPSC1		Homo Sapiens	SKIP004915	Diseased	Multiple Sclerosis
iPS Cell	NYSCF-MS-1017-10006-113-Skin-mi-iPSC1		Homo Sapiens	SKIP004914	Diseased	Multiple Sclerosis
iPS Cell	NYSCF-MS-1011-10006-112-Skin-mi-iPSC1		Homo Sapiens	SKIP004913	Diseased	Multiple Sclerosis
iPS Cell	NYSCF-MS-1008-10006-109-Skin-mi-iPSC1		Homo Sapiens	SKIP004912	Diseased	Multiple Sclerosis
iPS Cell	NYSCF-MS-1007-10006-108-Skin-mi-iPSC1		Homo Sapiens	SKIP004911	Diseased	Multiple Sclerosis
iPS Cell	NYSCF-MS-1006-10006-107-Skin-mi-iPSC1		Homo Sapiens	SKIP004910	Diseased	Multiple Sclerosis
iPS Cell	NYSCF-MS-1005-10006-106-Skin-mi-iPSC1		Homo Sapiens	SKIP004909	Diseased	Multiple Sclerosis
iPS Cell	NYSCF-MS-1004-10006-105-Skin-mi-iPSC1		Homo Sapiens	SKIP004908	Diseased	Multiple Sclerosis
iPS Cell	NYSCF-MS-1003-10006-104-Skin-mi-iPSC1		Homo Sapiens	SKIP004907	Diseased	Multiple Sclerosis
iPS Cell	NYSCF-MS-1002-10006-103-Skin-mi-iPSC4		Homo Sapiens	SKIP004906	Diseased	Multiple Sclerosis
iPS Cell	NYSCF-MS-1001-10006-102-Skin-mi-iPSC4		Homo Sapiens	SKIP004905	Diseased	Multiple Sclerosis
iPS Cell	NYSCF-MS-1000-10006-101-Skin-mi-iPSC1		Homo Sapiens	SKIP004904	Diseased	Multiple Sclerosis
iPS Cell	NYSCF-DE-1158-1158-Skin-MR-iPSC1		Homo Sapiens	SKIP004903	Diseased	Diabetes Mellitus, Type 1
iPS Cell	NYSCF-DE-1113-1113-Skin-MR-iPSC1		Homo Sapiens	SKIP004902	Diseased	Diabetes Mellitus, Type 1 (44)
iPS Cell	NYSCF-DE-1111-1111-Skin-SV-iPSC1		Homo Sapiens	SKIP004901	Normal
iPS Cell	NYSCF-DE-1110-1110-Skin-SV-iPSC1		Homo Sapiens	SKIP004900	Normal
iPS Cell	NYSCF-DE-1109-1109-Skin-MR-iPSC1		Homo Sapiens	SKIP004899	Diseased	Diabetes Mellitus, Type 1
iPS Cell	NYSCF-DE-1091-1091-Skin-MR-iPSC1		Homo Sapiens	SKIP004898	Diseased	Diabetes Mellitus, Type 1 (1)
iPS Cell	NYSCF-DE-1086-1086-Skin-MR-iPSC1		Homo Sapiens	SKIP004897	Diseased	Diabetes Mellitus, Type 1 (18)
iPS Cell	NYSCF-DE-1064-1064-Skin-MR-iPSC1		Homo Sapiens	SKIP004896	Diseased	Diabetes Mellitus, Type 1 (51)
iPS Cell	NYSCF-DE-1060-1060-Skin-MR-iPSC1		Homo Sapiens	SKIP004895	Diseased	Diabetes Mellitus, Type 1 (12)
iPS Cell	NYSCF-DE-1057-1057-Skin-MR-iPSC1		Homo Sapiens	SKIP004894	Diseased	Diabetes Mellitus, Type 1 (10)
iPS Cell	NYSCF-DE-1054-1054-Skin-MR-iPSC1		Homo Sapiens	SKIP004893	Diseased	Diabetes Mellitus, Type 1 (3)
iPS Cell	NYSCF-DE-1052-1052-Skin-MR-iPSC1		Homo Sapiens	SKIP004892	Diseased	Diabetes Mellitus, Type 1 (42)
iPS Cell	NYSCF-DE-1051-1051-Skin-MR-iPSC1		Homo Sapiens	SKIP004891	Diseased	Diabetes Mellitus, Type 1 (21)
iPS Cell	NYSCF-DE-1048-1048-Skin-MR-iPSC1		Homo Sapiens	SKIP004890	Diseased	Diabetes Mellitus, Type 1 (43)
iPS Cell	NYSCF-DE-1046-1046-Skin-MR-iPSC1		Homo Sapiens	SKIP004889	Diseased	Diabetes Mellitus, Type 1 (43)
iPS Cell	NYSCF-DE-1045-1045-Skin-MR-iPSC1		Homo Sapiens	SKIP004888	Diseased	Diabetes Mellitus, Type 1 (13)
iPS Cell	NYSCF-DE-1044-1044-Skin-MR-iPSC1		Homo Sapiens	SKIP004887	Diseased	Diabetes Mellitus, Type 1 (11)
iPS Cell	NYSCF-DE-1039-1039-Skin-MR-iPSC1		Homo Sapiens	SKIP004886	Diseased	Diabetes Mellitus, Type 1 (6)
iPS Cell	NYSCF-DE-1035-1035-Skin-MR-iPSC1		Homo Sapiens	SKIP004885	Diseased	Diabetes Mellitus, Type 1 (5)
iPS Cell	NYSCF-DE-1034-1034-Skin-RV-IPSC1		Homo Sapiens	SKIP004884	Normal
iPS Cell	NYSCF-DE-1034-1034-Skin-SV-iPSC1		Homo Sapiens	SKIP004883	Normal
iPS Cell	NYSCF-DE-1028-1028-Skin-MR-iPSC1		Homo Sapiens	SKIP004882	Diseased	Diabetes Mellitus, Type 1 (45)
iPS Cell	NYSCF-DE-1024-1024-Skin-RV-IPSC1		Homo Sapiens	SKIP004881	Diseased	Diabetes Mellitus, Type 1 (3)
iPS Cell	NYSCF-DE-1024-1024-Skin-MR-iPSC1		Homo Sapiens	SKIP004880	Diseased	Diabetes Mellitus, Type 1 (3)
iPS Cell	NYSCF-DE-1020-1020-Skin-MR-iPSC1		Homo Sapiens	SKIP004879	Diseased	Diabetes Mellitus, Type 1 (17)
iPS Cell	NYSCF-DE-1019-1019-Skin-MR-iPSC1		Homo Sapiens	SKIP004878	Diseased	Diabetes Mellitus, Type 1 (25)
iPS Cell	NYSCF-DE-1019-1019-Skin-RV-IPSC1		Homo Sapiens	SKIP004877	Diseased	Diabetes Mellitus, Type 1 (25)
iPS Cell	NYSCF-DE-1018-1018-Skin-RV-IPSC11		Homo Sapiens	SKIP004876	Diseased	Diabetes Mellitus, Type 1 (10)
iPS Cell	NYSCF-DE-1018-1018-Skin-MR1		Homo Sapiens	SKIP004875	Diseased	Diabetes Mellitus, Type 1 (10)
iPS Cell	NYSCF-DE-1017-1017-Skin-MR1		Homo Sapiens	SKIP004874	Diseased	Diabetes Mellitus, Type 1 (3)
iPS Cell	NYSCF-DE-1016-1016-Skin-RV-IPSC1		Homo Sapiens	SKIP004873	Normal
iPS Cell	NYSCF-DE-1005-1005-Skin-RV-IPSC1		Homo Sapiens	SKIP004872	Diseased	Diabetes Mellitus, Type 1 (4)
iPS Cell	NYSCF-DE-1000-1000-Skin-RV-IPSC1		Homo Sapiens	SKIP004871	Diseased	Diabetes Mellitus, Type 1 (18)
iPS Cell	NYSCF-AD-1021-AG08446-Skin-RV-IPSC1		Homo Sapiens	SKIP004870	Diseased	Alzheimer's disease
iPS Cell	NYSCF-AD-1019-AG07889-Skin-RV-IPSC1		Homo Sapiens	SKIP004869	Normal
iPS Cell	NYSCF-AD-1016-AG07768-Skin-RV-IPSC1		Homo Sapiens	SKIP004868	Diseased	Alzheimer's disease
iPS Cell	NYSCF-AD-1015-AG07671-Skin-RV-IPSC1		Homo Sapiens	SKIP004867	Diseased	Alzheimer's disease
iPS Cell	NYSCF-AD-1013-AG06842-Skin-RV-IPSC1		Homo Sapiens	SKIP004866	Normal
iPS Cell	NYSCF-AD-1012-ASC30-Dura-SV-iPSC1		Homo Sapiens	SKIP004865	Diseased	Parkinson Disease
iPS Cell	NYSCF-AD-1011-ASC27-Dura-SV-iPSC2		Homo Sapiens	SKIP004864	Diseased	Huntington Disease
iPS Cell	NYSCF-AD-1011-ASC27-Dura-SV-iPSC1		Homo Sapiens	SKIP004863	Diseased	Huntington Disease
iPS Cell	NYSCF-AD-1007-ASC19-Dura-SV-iPSC1		Homo Sapiens	SKIP004862	Diseased	Amyotrophic Lateral Sclerosis
iPS Cell	NYSCF-AD-1001-ASC7-Dura-SV-iPSC1		Homo Sapiens	SKIP004861	Diseased	Alzheimer's disease
iPS Cell	NYSCF-AD-1000-ASC2-Skin-SV-iPSC1		Homo Sapiens	SKIP004860	Diseased	Multiple System Atrophy
iPS Cell	NYSCF-AD-1000-ASC2-Dura-SV-iPSC1		Homo Sapiens	SKIP004859	Diseased	Multiple System Atrophy
iPS Cell	NYSCF-10005-901-901-Skin-mR-iPSC		Homo Sapiens	SKIP004858	Normal
iPS Cell	NYSCF-10005-900-900-Skin-mR-iPSC		Homo Sapiens	SKIP004857	Diseased	Arthritis (70);Herpes Zoster (70);Parkinson Disease (76)
iPS Cell	NYSCF-10005-888-888-Skin-mR-iPSC		Homo Sapiens	SKIP004856	Diseased	Arthritis (61);Asthma;Bronchitis, Chronic;Depression;Diabetes Mellitus, Type 2 (65);Gastroesophageal Reflux (50);Hypercholesterolemia (65);Hypertension (65);Leukemia (48);Spinal Stenosis
iPS Cell	NYSCF-10005-885-885-Skin-mR-iPSC		Homo Sapiens	SKIP004855	Diseased	Blood Coagulation Disorders (72);Hypercholesterolemia (50)
iPS Cell	NYSCF-10005-882-882-Skin-mR-iPSC		Homo Sapiens	SKIP004854	Diseased	Depression (39)
iPS Cell	NYSCF-10005-876-876-Skin-mR-iPSC		Homo Sapiens	SKIP004853	Normal
iPS Cell	NYSCF-10005-861-861-Skin-mR-iPSC		Homo Sapiens	SKIP004852	Normal
iPS Cell	NYSCF-10005-845-845-Skin-mR-iPSC		Homo Sapiens	SKIP004851	Normal
iPS Cell	NYSCF-10005-841-841-Skin-mR-iPSC		Homo Sapiens	SKIP004850	Diseased	Anxiety (79);Aortic Aneurysm (70);Diverticulitis;Obsessive Compulsive Disorder (79);Scoliosis (60);Skin cancer
iPS Cell	NYSCF-10005-835-835-Skin-mR-iPSC		Homo Sapiens	SKIP004849	Diseased	Asthma (3)
iPS Cell	NYSCF-10005-830-830-Skin-mR-iPSC		Homo Sapiens	SKIP004848	Diseased	Hypercholesterolemia (42);Myocardial Infarction (42)
iPS Cell	NYSCF-10005-825-825-Skin-mR-iPSC		Homo Sapiens	SKIP004847	Normal
iPS Cell	NYSCF-10005-824-824-Skin-mR-iPSC		Homo Sapiens	SKIP004846	Diseased	Irritable Bowel Syndrome (15)
iPS Cell	NYSCF-10005-819-819-Skin-mR-iPSC		Homo Sapiens	SKIP004845	Normal
iPS Cell	NYSCF-10005-818-818-Skin-mR-iPSC		Homo Sapiens	SKIP004844	Normal
iPS Cell	NYSCF-10005-808-808-Skin-mR-iPSC		Homo Sapiens	SKIP004843	Normal
iPS Cell	NYSCF-10005-794-794-Skin-mR-iPSC		Homo Sapiens	SKIP004842	Normal
iPS Cell	NYSCF-10005-780-780-Skin-mR-iPSC		Homo Sapiens	SKIP004841	Normal
iPS Cell	NYSCF-10005-773-773-Skin-mR-iPSC		Homo Sapiens	SKIP004840	Diseased	Asthma (30);Gastroesophageal Reflux (29)
iPS Cell	NYSCF-10005-767-767-Skin-mR-iPSC		Homo Sapiens	SKIP004839	Normal
iPS Cell	NYSCF-10005-752-752-Skin-mR-iPSC		Homo Sapiens	SKIP004838	Diseased	Asthma (19);Depression (17);Hypercholesterolemia (40);Hypertension (40);Kidney Calculi (40);Polycystic Ovary Syndrome
iPS Cell	NYSCF-10005-750-750-Skin-mR-iPSC		Homo Sapiens	SKIP004837	Normal
iPS Cell	NYSCF-10005-743-743-Skin-mR-iPSC		Homo Sapiens	SKIP004836	Normal
iPS Cell	NYSCF-10005-739-739-Skin-mR-iPSC		Homo Sapiens	SKIP004835	Normal
iPS Cell	NYSCF-10005-733-733-Skin-mR-iPSC		Homo Sapiens	SKIP004834	Normal
iPS Cell	NYSCF-10005-716-716-Skin-mR-iPSC		Homo Sapiens	SKIP004833	Diseased	Heart Diseases
iPS Cell	NYSCF-10005-709-709-Skin-mR-iPSC		Homo Sapiens	SKIP004832	Diseased	Asthma (5)
iPS Cell	NYSCF-10005-705-705-Skin-mR-iPSC		Homo Sapiens	SKIP004831	Diseased	Hypercholesterolemia (31)
iPS Cell	NYSCF-10005-702-702-Skin-mR-iPSC		Homo Sapiens	SKIP004830	Diseased	Anxiety (30);Bipolar Disorder (30);Depression (30)
iPS Cell	NYSCF-10005-700-700-Skin-mR-iPSC		Homo Sapiens	SKIP004829	Diseased	Rheumatic Fever (7);Skin cancer (40)
iPS Cell	NYSCF-10005-699-699-Skin-mR-iPSC		Homo Sapiens	SKIP004828	Diseased	Herpes Zoster (35);Herpes Zoster (55);Hypertension (60);Parkinson Disease (70);Peptic Ulcer (30)
iPS Cell	NYSCF-10005-694-694-Skin-mR-iPSC		Homo Sapiens	SKIP004827	Normal
iPS Cell	NYSCF-10005-689-689-Skin-mR-iPSC		Homo Sapiens	SKIP004826	Normal
iPS Cell	NYSCF-10005-687-687-Skin-mR-iPS		Homo Sapiens	SKIP004825	Diseased	Diabetes Mellitus, Type 1 (55)
iPS Cell	NYSCF-10005-686-686-Skin-mR-iPSC		Homo Sapiens	SKIP004824	Diseased	Bipolar Disorder (35)
iPS Cell	NYSCF-10005-684-684-Skin-mR-iPSC		Homo Sapiens	SKIP004823	Normal
iPS Cell	NYSCF-10005-675-675-Skin-mR-iPSC		Homo Sapiens	SKIP004822	Normal
iPS Cell	NYSCF-10005-669-669-Skin-mR-iPSC		Homo Sapiens	SKIP004821	Normal
iPS Cell	NYSCF-10005-661-661-Skin-mR-iPSC		Homo Sapiens	SKIP004820	Diseased	Coronary Artery Disease (52);Hypercholesterolemia;Parkinson Disease (57)
iPS Cell	NYSCF-10005-660-660-Skin-mR-iPSC		Homo Sapiens	SKIP004819	Diseased	Colonic Polyps (50);Parkinson Disease
iPS Cell	NYSCF-10005-650-650-Skin-mR-iPSC		Homo Sapiens	SKIP004818	Normal
iPS Cell	NYSCF-10005-648-648-Skin-mR-iPSC		Homo Sapiens	SKIP004817	Diseased	Irritable Bowel Syndrome (32)
iPS Cell	NYSCF-10005-645-645-Skin-mR-iPSC		Homo Sapiens	SKIP004816	Diseased	Hypercholesterolemia (38);Hypotension (41);Parkinson Disease (28)
iPS Cell	NYSCF-10005-644-644-Skin-mR-iPSC		Homo Sapiens	SKIP004815	Normal
iPS Cell	NYSCF-10005-642-642-Skin-mR-iPSC		Homo Sapiens	SKIP004814	Diseased	Carcinoma, Basal Cell (45);Hypertension (65);Kidney Calculi
iPS Cell	NYSCF-10005-636-636-Skin-mR-iPSC		Homo Sapiens	SKIP004813	Diseased	Blood Coagulation Disorders (62);Gastroesophageal reflux disease (41);Hypercholesterolemia (55);Parkinson Disease (55);Skin cancer (64)
iPS Cell	NYSCF-10005-635-635-Skin-mR-iPSC		Homo Sapiens	SKIP004812	Normal
iPS Cell	NYSCF-10005-632-632-Skin-mR-iPSC		Homo Sapiens	SKIP004811	Diseased	Peripheral Nervous System Diseases (55);Polyradiculoneuropathy, Chronic Inflammatory Demyelinating (55)
iPS Cell	NYSCF-10005-623-623-Skin-mR-iPSC		Homo Sapiens	SKIP004810	Normal
iPS Cell	NYSCF-10005-617-617-Skin-mR-iPSC		Homo Sapiens	SKIP004809	Diseased	Alcoholism (52);Depression (52);Hypercholesterolemia (40);Hypertension (40)
iPS Cell	NYSCF-10005-611-611-Skin-mR-iPSC		Homo Sapiens	SKIP004808	Diseased	Infertility (30);Parkinson Disease (54)
iPS Cell	NYSCF-10005-605-605-Skin-mR-iPSC		Homo Sapiens	SKIP004807	Diseased	Colitis, Ulcerative (18)
iPS Cell	NYSCF-10005-598-598-Skin-mR-iPSC		Homo Sapiens	SKIP004806	Normal
iPS Cell	NYSCF-10005-597-597-Skin-mR-iPSC		Homo Sapiens	SKIP004805	Normal
iPS Cell	NYSCF-10005-596-596-Skin-mR-iPSC		Homo Sapiens	SKIP004804	Normal
iPS Cell	NYSCF-10005-592-592-Skin-mR-iPSC		Homo Sapiens	SKIP004803	Diseased	Gastroesophageal Reflux (0);Hypertension (50);Parkinson Disease (52);Peripheral Nervous System Diseases (50)
iPS Cell	NYSCF-10005-590-590-Skin-mR-iPSC		Homo Sapiens	SKIP004802	Diseased	Parkinson Disease (65)
iPS Cell	NYSCF-10005-585-585-Skin-mR-iPSC		Homo Sapiens	SKIP004801	Diseased	Hypertension (68)
iPS Cell	NYSCF-10005-583-583-Skin-mR-iPSC		Homo Sapiens	SKIP004800	Normal
iPS Cell	NYSCF-10005-582-582-Skin-mR-iPSC		Homo Sapiens	SKIP004799	Diseased	Coronary Artery Disease (65);Hypercholesterolemia;Hypertension;Osteoporosis (79);Peptic Ulcer (69);Skin cancer (60)
iPS Cell	NYSCF-10005-580-580-Skin-mR-iPSC		Homo Sapiens	SKIP004798	Normal
iPS Cell	NYSCF-10005-570-570-Skin-mR-iPSC		Homo Sapiens	SKIP004797	Diseased	Carcinoma, Basal Cell (72);Hypercholesterolemia (62);Hypertension (62);Tuberculosis (12)
iPS Cell	NYSCF-10005-569-569-Skin-mR-iPSC		Homo Sapiens	SKIP004796	Diseased	Arthritis, Rheumatoid;Skin cancer
iPS Cell	NYSCF-10005-568-568-Skin-mR-iPSC		Homo Sapiens	SKIP004795	Diseased	Anxiety (26)
iPS Cell	NYSCF-10005-566-566-Skin-mR-iPSC		Homo Sapiens	SKIP004794	Diseased	Asthma (35)
iPS Cell	NYSCF-10005-562-562-Skin-mR-iPSC		Homo Sapiens	SKIP004793	Diseased	Parkinson Disease (44)
iPS Cell	NYSCF-10005-558-558-Skin-mR-iPSC		Homo Sapiens	SKIP004792	Diseased	Hepatitis C (53);Parkinson Disease (59)
iPS Cell	NYSCF-10005-555-555-Skin-mR-iPSC		Homo Sapiens	SKIP004791	Normal
iPS Cell	NYSCF-10005-491-491-Skin-mR-iPSC		Homo Sapiens	SKIP004790	Diseased	Thalassemia (0)
iPS Cell	NYSCF-10005-478-478-Skin-mR-iPSC		Homo Sapiens	SKIP004789	Normal
iPS Cell	NYSCF-10005-476-476-Skin-mR-iPSC		Homo Sapiens	SKIP004788	Normal
iPS Cell	NYSCF-10005-470-470-Skin-mR-iPSC		Homo Sapiens	SKIP004787	Normal
iPS Cell	NYSCF-10005-469-469-Skin-mR-iPSC		Homo Sapiens	SKIP004786	Normal
iPS Cell	NYSCF-10005-465-465-Skin-mR-iPSC		Homo Sapiens	SKIP004785	Normal
iPS Cell	NYSCF-10005-460-460-Skin-mR-iPSC		Homo Sapiens	SKIP004784	Normal
iPS Cell	NYSCF-10005-459-459-Skin-mR-iPSC		Homo Sapiens	SKIP004783	Normal
iPS Cell	NYSCF-10005-438-438-Skin-mR-iPSC		Homo Sapiens	SKIP004782	Diseased	Asthma (65);Parkinson Disease (66)
iPS Cell	NYSCF-10005-437-437-Skin-mR-iPSC		Homo Sapiens	SKIP004781	Diseased	Osteoporosis (55);Parkinson Disease (58)
iPS Cell	NYSCF-10005-434-434-Skin-mR-iPSC		Homo Sapiens	SKIP004780	Diseased	Parkinson Disease (48)
iPS Cell	NYSCF-10005-433-433-Skin-mR-iPSC		Homo Sapiens	SKIP004779	Diseased	Lung Diseases (0);Mental Disorders
iPS Cell	NYSCF-10005-432-432-Skin-mR-iPSC		Homo Sapiens	SKIP004778	Normal
iPS Cell	NYSCF-10005-425-425-Skin-mR-iPSC		Homo Sapiens	SKIP004777	Normal
iPS Cell	NYSCF-10005-417-417-Skin-mR-iPSC		Homo Sapiens	SKIP004776	Diseased	Coronary Artery Disease (55);Parkinson Disease (68);Skin cancer (52)
iPS Cell	NYSCF-10005-415-415-Skin-mR-iPSC		Homo Sapiens	SKIP004775	Diseased	Asthma (52);Heart Diseases (58);Hypercholesterolemia (50);Hypertension (50);Parkinson Disease (56);Rheumatic Fever (12);Sleep Apnea (53)
iPS Cell	NYSCF-10005-411-411-Skin-mR-iPSC		Homo Sapiens	SKIP004774	Diseased	Diabetes Mellitus (40);Hypercholesterolemia (40);Hypertension (65);Osteoporosis (60);Parkinson Disease (50);Spinal Stenosis (60)
iPS Cell	NYSCF-10005-406-406-Skin-mR-iPSC		Homo Sapiens	SKIP004773	Diseased	Gastroesophageal Reflux (40);Hypercholesterolemia (60);Parkinson Disease (62)
iPS Cell	NYSCF-10005-405-405-Skin-mR-iPSC		Homo Sapiens	SKIP004772	Diseased	Parkinson Disease (34)
iPS Cell	NYSCF-10005-401-401-Skin-mR-iPSC		Homo Sapiens	SKIP004771	Diseased	Carcinoma, Basal Cell (62);Gastrointestinal Bleeding (67);Hypercholesterolemia (62);Mild Deafness (67);Parkinson Disease (72)
iPS Cell	NYSCF-10005-392-392-Skin-mR-iPSC		Homo Sapiens	SKIP004770	Diseased	Nephrolithiasis (58);Parkinson Disease (48)
iPS Cell	NYSCF-10005-384-384-Skin-mR-iPSC		Homo Sapiens	SKIP004769	Diseased	Asthma (50);Parkinson Disease (65)
iPS Cell	NYSCF-10005-375-375-Skin-mR-iPSC		Homo Sapiens	SKIP004768	Diseased	Double Visions (75);Glaucoma (68);Hypercholesterolemia (70);Hypertension (70);Parkinson Disease (77);Skin cancer
iPS Cell	NYSCF-10005-370-370-Skin-mR-iPSC		Homo Sapiens	SKIP004767	Diseased	Parkinson Disease (65)
iPS Cell	NYSCF-10005-186-186-Skin-mR-iPSC		Homo Sapiens	SKIP004766	Normal
iPS Cell	NYSCF-10005-177-177-Skin-mR-iPSC		Homo Sapiens	SKIP004765	Normal
iPS Cell	NYSCF-10005-141-141-Skin-mR-iPSC		Homo Sapiens	SKIP004764	Normal
iPS Cell	NYSCF-10005-118-118-Skin-mR-iPSC		Homo Sapiens	SKIP004763	Normal
iPS Cell	NYSCF-10005-128-128-Skin-mR-iPSC		Homo Sapiens	SKIP004762	Normal
iPS Cell	NYSCF-10005-117-117-Skin-sv-iPSC		Homo Sapiens	SKIP004761	Diseased	Parkinson Disease (61)
iPS Cell	NYSCF-10005-1085-1085-Skin-mR-iPS		Homo Sapiens	SKIP004760	Normal
iPS Cell	NYSCF-10005-1082-1082-Skin-mR-iPS		Homo Sapiens	SKIP004759	Normal
iPS Cell	NYSCF-10005-1081-1081-Skin-mR-iPS		Homo Sapiens	SKIP004758	Normal
iPS Cell	NYSCF-10005-1076-1076-Skin-mR-iPS		Homo Sapiens	SKIP004757	Normal
iPS Cell	NYSCF-10005-1073-1073-Skin-mR-iPS		Homo Sapiens	SKIP004756	Normal
iPS Cell	NYSCF-10005-1071-1071-Skin-mR-iPS		Homo Sapiens	SKIP004755	Normal
iPS Cell	NYSCF-10005-1070-1070-Skin-mR-iPSC		Homo Sapiens	SKIP004754	Normal
iPS Cell	NYSCF-10005-1069-1069-Skin-mR-iPSC		Homo Sapiens	SKIP004753	Normal
iPS Cell	NYSCF-10005-1067-1067-Skin-mR-iPSC		Homo Sapiens	SKIP004752	Normal
iPS Cell	NYSCF-10005-1065-1065-Skin-mR-iPSC		Homo Sapiens	SKIP004751	Diseased	Spondylolisthesis (1);asthma (25);renal reflux (1)
iPS Cell	NYSCF-10005-1064-1064-Skin-mR-iPSC		Homo Sapiens	SKIP004750	Normal
iPS Cell	NYSCF-10005-1063-1063-Skin-mR-iPSC		Homo Sapiens	SKIP004749	Normal
iPS Cell	NYSCF-10005-1062-1062-Skin-mR-iPSC		Homo Sapiens	SKIP004748	Diseased	asthma (3)
iPS Cell	NYSCF-10005-1059-1059-Skin-mR-iPSC		Homo Sapiens	SKIP004747	Normal
iPS Cell	NYSCF-10005-1058-1058-Skin-mR-iPSC		Homo Sapiens	SKIP004746	Normal
iPS Cell	NYSCF-10005-1051-1051-Skin-mR-iPSC		Homo Sapiens	SKIP004745	Diseased	asthma (1)
iPS Cell	NYSCF-10005-1050-1050-Skin-mR-iPSC		Homo Sapiens	SKIP004744	Normal
iPS Cell	NYSCF-10005-1049-1049-Skin-mR-iPSC		Homo Sapiens	SKIP004743	Normal
iPS Cell	NYSCF-10005-1048-1048-Skin-mR-iPSC		Homo Sapiens	SKIP004742	Normal
iPS Cell	NYSCF-10005-1047-1047-Skin-mR-iPSC		Homo Sapiens	SKIP004741	Diseased	hypertension (36);kidney stones (30)
iPS Cell	NYSCF-10005-1046-1046-Skin-mR-iPSC		Homo Sapiens	SKIP004740	Diseased	tuberculosis (19)
iPS Cell	NYSCF-10005-1044-1044-Skin-mR-iPSC		Homo Sapiens	SKIP004739	Diseased	polycystic ovary syndrome(30)
iPS Cell	F12-4		Homo Sapiens	SKIP004738	Normal
iPS Cell	F12-3		Homo Sapiens	SKIP004737	Normal
iPS Cell	F12-6		Homo Sapiens	SKIP004736	Normal
iPS Cell	F124B-4		Homo Sapiens	SKIP004735	Normal
iPS Cell	F12-5		Homo Sapiens	SKIP004734	Normal
iPS Cell	F124-10		Homo Sapiens	SKIP004733	Normal
iPS Cell	F124B-3		Homo Sapiens	SKIP004732	Normal
iPS Cell	F12-8		Homo Sapiens	SKIP004731	Normal
iPS Cell	F12-1		Homo Sapiens	SKIP004730	Normal
iPS Cell	F124-5		Homo Sapiens	SKIP004729	Normal
iPS Cell	ND41872-iPSC		Homo Sapiens	SKIP004728	Diseased	Frontotemporal Lobar Degeneration
iPS Cell	ND41870-iPSC		Homo Sapiens	SKIP004727	Diseased	Frontotemporal Lobar Degeneration
iPS Cell	ND41869-iPSC		Homo Sapiens	SKIP004726	Diseased	Frontotemporal Lobar Degeneration
iPS Cell	ND41865-iPSC		Homo Sapiens	SKIP004725	Normal
iPS Cell	ND41866-iPSC		Homo Sapiens	SKIP004724	Normal
iPS Cell	ND41656-iPS		Homo Sapiens	SKIP004723	Diseased	Huntington Disease
iPS Cell	ND41657-iPS		Homo Sapiens	SKIP004722	Diseased	Huntington Disease
iPS Cell	ND41114-iPSC		Homo Sapiens	SKIP004721	Normal
iPS Cell	ND41113-iPSC		Homo Sapiens	SKIP004720	Normal
iPS Cell	ND40020-iPSC		Homo Sapiens	SKIP004719	Normal
iPS Cell	ND40019-iPSC		Homo Sapiens	SKIP004718	Normal
iPS Cell	ND40018-iPSC		Homo Sapiens	SKIP004717	Diseased	Parkinson Disease
iPS Cell	ND39896-iPSC		Homo Sapiens	SKIP004716	Diseased	Parkinson Disease
iPS Cell	ND39037-iPSC		Homo Sapiens	SKIP004715	Diseased	Amyotrophic Lateral Sclerosis (58)
iPS Cell	ND39036-iPSC		Homo Sapiens	SKIP004714	Normal
iPS Cell	ND39034-iPSC		Homo Sapiens	SKIP004713	Diseased	Amyotrophic Lateral Sclerosis (36)
iPS Cell	ND39032-iPSC		Homo Sapiens	SKIP004712	Diseased	Amyotrophic Lateral Sclerosis (49)
iPS Cell	ND38555-iPSC		Homo Sapiens	SKIP004711	Normal
iPS Cell	ND38554-iPSC		Homo Sapiens	SKIP004710	Normal
iPS Cell	ND38552-iPSC		Homo Sapiens	SKIP004709	Diseased	Huntington Disease (27)
iPS Cell	ND38551-iPSC		Homo Sapiens	SKIP004708	Diseased	Huntington Disease (30)
iPS Cell	ND38549-iPSC		Homo Sapiens	SKIP004707	Normal
iPS Cell	ND38548-iPSC		Homo Sapiens	SKIP004706	Diseased	Huntington Disease (60)
iPS Cell	ND38547-iPSC		Homo Sapiens	SKIP004705	Diseased	Huntington Disease
iPS Cell	ND38546-iPS		Homo Sapiens	SKIP004704	Diseased	Huntington Disease (42)
iPS Cell	ND38545-iPSC		Homo Sapiens	SKIP004703	Diseased	Huntington Disease (36)
iPS Cell	ND38477-iPSC		Homo Sapiens	SKIP004702	Diseased	Parkinson Disease (32)
iPS Cell	ND36999-iPSC		Homo Sapiens	SKIP004701	Diseased	Huntington Disease
iPS Cell	ND36998-iPSC		Homo Sapiens	SKIP004700	Diseased	Huntington's Disease (18)
iPS Cell	ND36997-iPSC		Homo Sapiens	SKIP004699	Normal
iPS Cell	ND35673-iPSC		Homo Sapiens	SKIP004698	Normal
iPS Cell	ND35671-iPSC		Homo Sapiens	SKIP004697	Diseased	Amyotrophic Lateral Sclerosis (62)
iPS Cell	ND35670-iPSC		Homo Sapiens	SKIP004696	Diseased	Amyotrophic Lateral Sclerosis (54)
iPS Cell	ND35669-iPSC		Homo Sapiens	SKIP004695	Diseased	Amyotrophic Lateral Sclerosis (67)
iPS Cell	ND35668-iPSC		Homo Sapiens	SKIP004694	Diseased	Amyotrophic Lateral Sclerosis (47)
iPS Cell	ND35666-iPSC		Homo Sapiens	SKIP004693	Diseased	Amyotrophic Lateral Sclerosis (56)
iPS Cell	ND35664-iPSC		Homo Sapiens	SKIP004692	Diseased	Amyotrophic Lateral Sclerosis (63)
iPS Cell	ND35663-iPSC		Homo Sapiens	SKIP004691	Diseased	Amyotrophic Lateral Sclerosis (43)
iPS Cell	ND35662-iPSC		Homo Sapiens	SKIP004690	Diseased	Amyotrophic Lateral Sclerosis (39)
iPS Cell	ND35661-iPSC		Homo Sapiens	SKIP004689	Diseased	Amyotrophic Lateral Sclerosis (50)
iPS Cell	ND35660-iPSC		Homo Sapiens	SKIP004688	Diseased	Amyotrophic Lateral Sclerosis (46)
iPS Cell	ND35659-iPSC		Homo Sapiens	SKIP004687	Normal
iPS Cell	ND35658-iPSC		Homo Sapiens	SKIP004686	Diseased	Amyotrophic Lateral Sclerosis (44)
iPS Cell	ND35371-iPSC		Homo Sapiens	SKIP004685	Normal
iPS Cell	ND35367-iPSC		Homo Sapiens	SKIP004684	Diseased	Parkinson Disease (55)
iPS Cell	ND34393-iPSC		Homo Sapiens	SKIP004683	Normal
iPS Cell	ND34394-iPSC		Homo Sapiens	SKIP004682	Normal
iPS Cell	ND34391-iPSC		Homo Sapiens	SKIP004681	Diseased	Diffuse Lewy Body Disease (52);PARKINSON DISEASE,FAMILIAL, TYPE 1; PARK1 (52)
iPS Cell	SCRP4602i		Homo Sapiens	SKIP004680	Normal
iPS Cell	SCRP4505i		Homo Sapiens	SKIP004679	Normal
iPS Cell	SCRP4403i		Homo Sapiens	SKIP004678	Normal
iPS Cell	SCRP4305i		Homo Sapiens	SKIP004677	Normal
iPS Cell	SCRP4203i		Homo Sapiens	SKIP004676	Normal
iPS Cell	MRC5-RiPS-1.3		Homo Sapiens	SKIP004675	Normal
iPS Cell	MRC5-RiPS-1.8		Homo Sapiens	SKIP004674	Normal
iPS Cell	MRC5-RiPS-1.9		Homo Sapiens	SKIP004673	Normal
iPS Cell	MRC5-RiPS-1.2		Homo Sapiens	SKIP004672	Normal
iPS Cell	MRC5-RiPS-1.11		Homo Sapiens	SKIP004671	Normal
iPS Cell	DiPS-H2.1		Homo Sapiens	SKIP004670	Diseased	Diabetes mellitus, type 1 (3)
iPS Cell	DiPS-H2.4		Homo Sapiens	SKIP004669	Diseased	Diabetes mellitus, type 1 (3)
iPS Cell	DiPS-H1.5		Homo Sapiens	SKIP004668	Diseased	Diabetes mellitus, type 1 (21)
iPS Cell	KYOU-DXR0109B Human Induced Pluripotent Stem Cells [201B7] (ATCC(R) ACS-1023(TM))		Homo Sapiens	SKIP004667	Normal
iPS Cell	JHU078i		Homo Sapiens	SKIP004666	Normal
iPS Cell	JHU122i		Homo Sapiens	SKIP004665	Normal
iPS Cell	JHU117i		Homo Sapiens	SKIP004664	Normal
iPS Cell	JHU107i		Homo Sapiens	SKIP004663	Normal
iPS Cell	JHU017i		Homo Sapiens	SKIP004662	Normal
iPS Cell	JHU095i		Homo Sapiens	SKIP004661	Normal
iPS Cell	JHU119i		Homo Sapiens	SKIP004660	Normal
iPS Cell	JHU121i		Homo Sapiens	SKIP004659	Normal
iPS Cell	JHU064i		Homo Sapiens	SKIP004658	Normal
iPS Cell	JHU002i-1		Homo Sapiens	SKIP004657	Normal
iPS Cell	JHU148i		Homo Sapiens	SKIP004656	Normal
iPS Cell	JHU141i		Homo Sapiens	SKIP004655	Normal
iPS Cell	JHU130i		Homo Sapiens	SKIP004654	Normal
iPS Cell	JHU083i		Homo Sapiens	SKIP004653	Normal
iPS Cell	JHU067i		Homo Sapiens	SKIP004652	Normal
iPS Cell	JHU217i		Homo Sapiens	SKIP004651	Normal
iPS Cell	JHU100i		Homo Sapiens	SKIP004650	Normal
iPS Cell	JHU099i		Homo Sapiens	SKIP004649	Normal
iPS Cell	JHU027i		Homo Sapiens	SKIP004648	Normal
iPS Cell	JHU204i		Homo Sapiens	SKIP004647	Normal
iPS Cell	JHU062i		Homo Sapiens	SKIP004646	Normal
iPS Cell	JHU103i		Homo Sapiens	SKIP004645	Normal
iPS Cell	JHU086i		Homo Sapiens	SKIP004644	Normal
iPS Cell	JHU142i		Homo Sapiens	SKIP004643	Normal
iPS Cell	JHU160i		Homo Sapiens	SKIP004642	Normal
iPS Cell	JHU156i		Homo Sapiens	SKIP004641	Normal
iPS Cell	JHU088i		Homo Sapiens	SKIP004640	Normal
iPS Cell	JHU001i		Homo Sapiens	SKIP004639	Normal
iPS Cell	JHU256i		Homo Sapiens	SKIP004638	Normal
iPS Cell	JHU255i		Homo Sapiens	SKIP004637	Normal
iPS Cell	JHU177i		Homo Sapiens	SKIP004636	Normal
iPS Cell	JHU240i		Homo Sapiens	SKIP004635	Normal
iPS Cell	JHU164i		Homo Sapiens	SKIP004634	Normal
iPS Cell	JHU158i		Homo Sapiens	SKIP004633	Normal
iPS Cell	JHU188i		Homo Sapiens	SKIP004632	Normal
iPS Cell	JHU214i		Homo Sapiens	SKIP004631	Normal
iPS Cell	JHU018i		Homo Sapiens	SKIP004630	Normal
iPS Cell	JHU245i		Homo Sapiens	SKIP004629	Normal
iPS Cell	JHU019i		Homo Sapiens	SKIP004628	Normal
iPS Cell	JHU048i		Homo Sapiens	SKIP004627	Normal
iPS Cell	JHU215i		Homo Sapiens	SKIP004626	Normal
iPS Cell	JHU004i-2		Homo Sapiens	SKIP004625	Normal
iPS Cell	JHU044i		Homo Sapiens	SKIP004624	Normal
iPS Cell	JHU023i		Homo Sapiens	SKIP004623	Normal
iPS Cell	JHU226i		Homo Sapiens	SKIP004622	Normal
iPS Cell	JHU259i		Homo Sapiens	SKIP004621	Normal
iPS Cell	JHU054i		Homo Sapiens	SKIP004620	Normal
iPS Cell	JHU157i		Homo Sapiens	SKIP004619	Normal
iPS Cell	JHU035i		Homo Sapiens	SKIP004618	Normal
iPS Cell	JHU198i		Homo Sapiens	SKIP004617	Normal
iPS Cell	JHU257i		Homo Sapiens	SKIP004616	Normal
iPS Cell	JHU183i		Homo Sapiens	SKIP004615	Normal
iPS Cell	JHU242i		Homo Sapiens	SKIP004614	Normal
iPS Cell	JHU206i		Homo Sapiens	SKIP004613	Normal
iPS Cell	JHU227i		Homo Sapiens	SKIP004612	Normal
iPS Cell	JHU043i		Homo Sapiens	SKIP004611	Normal
iPS Cell	JHU042i		Homo Sapiens	SKIP004610	Normal
iPS Cell	JHU049i		Homo Sapiens	SKIP004609	Normal
iPS Cell	JHU133i		Homo Sapiens	SKIP004608	Normal
iPS Cell	JHU199i		Homo Sapiens	SKIP004607	Normal
iPS Cell	JHU024i		Homo Sapiens	SKIP004606	Normal
iPS Cell	JHU248i		Homo Sapiens	SKIP004605	Normal
iPS Cell	JHU230i		Homo Sapiens	SKIP004604	Normal
iPS Cell	JHU207i		Homo Sapiens	SKIP004603	Normal
iPS Cell	JHU040i		Homo Sapiens	SKIP004602	Normal
iPS Cell	JHU190i		Homo Sapiens	SKIP004601	Normal
iPS Cell	JHU235i		Homo Sapiens	SKIP004600	Normal
iPS Cell	JHU038i		Homo Sapiens	SKIP004599	Normal
iPS Cell	JHU233i		Homo Sapiens	SKIP004598	Normal
iPS Cell	JHU187i		Homo Sapiens	SKIP004597	Normal
iPS Cell	JHU045i		Homo Sapiens	SKIP004596	Normal
iPS Cell	JHU012i-2		Homo Sapiens	SKIP004595	Normal
iPS Cell	JHU238i		Homo Sapiens	SKIP004594	Normal
iPS Cell	JHU173i		Homo Sapiens	SKIP004593	Normal
iPS Cell	JHU013i-2		Homo Sapiens	SKIP004592	Normal
iPS Cell	JHU232i		Homo Sapiens	SKIP004591	Normal
iPS Cell	JHU032i		Homo Sapiens	SKIP004590	Normal
iPS Cell	JHU079i		Homo Sapiens	SKIP004589	Normal
iPS Cell	JHU090i		Homo Sapiens	SKIP004588	Normal
iPS Cell	JHU236i		Homo Sapiens	SKIP004587	Normal
iPS Cell	JHU224i		Homo Sapiens	SKIP004586	Normal
iPS Cell	JHU203i		Homo Sapiens	SKIP004585	Normal
iPS Cell	JHU162i		Homo Sapiens	SKIP004584	Normal
iPS Cell	JHU253i		Homo Sapiens	SKIP004583	Normal
iPS Cell	JHU229i		Homo Sapiens	SKIP004582	Normal
iPS Cell	JHU181i		Homo Sapiens	SKIP004581	Normal
iPS Cell	JHU074i		Homo Sapiens	SKIP004580	Normal
iPS Cell	JHU081i		Homo Sapiens	SKIP004579	Normal
iPS Cell	JHU080i		Homo Sapiens	SKIP004578	Normal
iPS Cell	JHU033i		Homo Sapiens	SKIP004577	Normal
iPS Cell	JHU221i		Homo Sapiens	SKIP004576	Normal
iPS Cell	JHU085i		Homo Sapiens	SKIP004575	Normal
iPS Cell	JHU128i		Homo Sapiens	SKIP004574	Normal
iPS Cell	JHU052i		Homo Sapiens	SKIP004573	Normal
iPS Cell	JHU243i		Homo Sapiens	SKIP004572	Normal
iPS Cell	JHU192i		Homo Sapiens	SKIP004571	Normal
iPS Cell	JHU189i		Homo Sapiens	SKIP004570	Normal
iPS Cell	JHU185i		Homo Sapiens	SKIP004569	Normal
iPS Cell	JHU167i		Homo Sapiens	SKIP004568	Normal
iPS Cell	JHU053i		Homo Sapiens	SKIP004567	Normal
iPS Cell	JHU096i		Homo Sapiens	SKIP004566	Normal
iPS Cell	JHU063i		Homo Sapiens	SKIP004565	Normal
iPS Cell	JHU108i		Homo Sapiens	SKIP004564	Normal
iPS Cell	JHU218i		Homo Sapiens	SKIP004563	Normal
iPS Cell	JHU219i		Homo Sapiens	SKIP004562	Normal
iPS Cell	JHU126i		Homo Sapiens	SKIP004561	Normal
iPS Cell	JHU039i		Homo Sapiens	SKIP004560	Normal
iPS Cell	JHU205i		Homo Sapiens	SKIP004559	Normal
iPS Cell	JHU089i		Homo Sapiens	SKIP004558	Normal
iPS Cell	JHU163i		Homo Sapiens	SKIP004557	Normal
iPS Cell	JHU071i		Homo Sapiens	SKIP004556	Normal
iPS Cell	JHU070i		Homo Sapiens	SKIP004555	Normal
iPS Cell	JHU094i		Homo Sapiens	SKIP004554	Normal
iPS Cell	JHU225i		Homo Sapiens	SKIP004553	Normal
iPS Cell	JHU155i		Homo Sapiens	SKIP004552	Normal
iPS Cell	JHU154i		Homo Sapiens	SKIP004551	Normal
iPS Cell	JHU153i		Homo Sapiens	SKIP004550	Normal
iPS Cell	JHU123i		Homo Sapiens	SKIP004549	Normal
iPS Cell	JHU102i		Homo Sapiens	SKIP004548	Normal
iPS Cell	JHU106i		Homo Sapiens	SKIP004547	Normal
iPS Cell	JHU098i		Homo Sapiens	SKIP004546	Normal
iPS Cell	JHU127i		Homo Sapiens	SKIP004545	Normal
iPS Cell	JHU116i		Homo Sapiens	SKIP004544	Normal
iPS Cell	JHU201i		Homo Sapiens	SKIP004543	Normal
iPS Cell	JHU114i		Homo Sapiens	SKIP004542	Normal
iPS Cell	JHU105i		Homo Sapiens	SKIP004541	Normal
iPS Cell	JHU072i		Homo Sapiens	SKIP004540	Normal
iPS Cell	JHU210i		Homo Sapiens	SKIP004539	Normal
iPS Cell	JHU159i		Homo Sapiens	SKIP004538	Normal
iPS Cell	JHU060i-2		Homo Sapiens	SKIP004537	Normal
iPS Cell	JHU180i		Homo Sapiens	SKIP004536	Normal
iPS Cell	JHU056i		Homo Sapiens	SKIP004535	Normal
iPS Cell	JHU194i		Homo Sapiens	SKIP004534	Normal
iPS Cell	JHU244i		Homo Sapiens	SKIP004533	Normal
iPS Cell	JHU115i		Homo Sapiens	SKIP004532	Normal
iPS Cell	JHU073i		Homo Sapiens	SKIP004531	Normal
iPS Cell	JHU237i		Homo Sapiens	SKIP004530	Normal
iPS Cell	JHU197i		Homo Sapiens	SKIP004529	Normal
iPS Cell	JHU222i		Homo Sapiens	SKIP004528	Normal
iPS Cell	JHU247i		Homo Sapiens	SKIP004527	Normal
iPS Cell	JHU082i		Homo Sapiens	SKIP004526	Normal
iPS Cell	JHU231i		Homo Sapiens	SKIP004525	Normal
iPS Cell	JHU170i		Homo Sapiens	SKIP004524	Normal
iPS Cell	JHU101i		Homo Sapiens	SKIP004523	Normal
iPS Cell	JHU140i		Homo Sapiens	SKIP004522	Normal
iPS Cell	JHU228i		Homo Sapiens	SKIP004521	Normal
iPS Cell	JHU129i		Homo Sapiens	SKIP004520	Normal
iPS Cell	JHU055i		Homo Sapiens	SKIP004519	Normal
iPS Cell	JHU050i		Homo Sapiens	SKIP004518	Normal
iPS Cell	JHU216i		Homo Sapiens	SKIP004517	Normal
iPS Cell	JHU209i		Homo Sapiens	SKIP004516	Normal
iPS Cell	JHU234i		Homo Sapiens	SKIP004515	Normal
iPS Cell	JHU184i		Homo Sapiens	SKIP004514	Normal
iPS Cell	JHU186i		Homo Sapiens	SKIP004513	Normal
iPS Cell	JHU149i		Homo Sapiens	SKIP004512	Normal
iPS Cell	JHU151i		Homo Sapiens	SKIP004511	Normal
iPS Cell	JHU036i		Homo Sapiens	SKIP004510	Normal
iPS Cell	JHU022i		Homo Sapiens	SKIP004509	Normal
iPS Cell	JHU047i		Homo Sapiens	SKIP004508	Normal
iPS Cell	JHU191i		Homo Sapiens	SKIP004507	Normal
iPS Cell	JHU075i		Homo Sapiens	SKIP004506	Normal
iPS Cell	JHU178i		Homo Sapiens	SKIP004505	Normal
iPS Cell	JHU097i		Homo Sapiens	SKIP004504	Normal
iPS Cell	JHU172i		Homo Sapiens	SKIP004503	Normal
iPS Cell	JHU200i		Homo Sapiens	SKIP004502	Normal
iPS Cell	JHU252i		Homo Sapiens	SKIP004501	Normal
iPS Cell	JHU251i		Homo Sapiens	SKIP004500	Normal
iPS Cell	JHU208i		Homo Sapiens	SKIP004499	Normal
iPS Cell	JHU087i		Homo Sapiens	SKIP004498	Normal
iPS Cell	JHU084i		Homo Sapiens	SKIP004497	Normal
iPS Cell	JHU093i		Homo Sapiens	SKIP004496	Normal
iPS Cell	JHU132i		Homo Sapiens	SKIP004495	Normal
iPS Cell	JHU196i		Homo Sapiens	SKIP004494	Normal
iPS Cell	JHU220i		Homo Sapiens	SKIP004493	Normal
iPS Cell	JHU131i		Homo Sapiens	SKIP004492	Normal
iPS Cell	JHU250i		Homo Sapiens	SKIP004491	Normal
iPS Cell	JHU091i		Homo Sapiens	SKIP004490	Normal
iPS Cell	JHU165i		Homo Sapiens	SKIP004489	Normal
iPS Cell	JHU037i		Homo Sapiens	SKIP004488	Normal
iPS Cell	JHU166i		Homo Sapiens	SKIP004487	Normal
iPS Cell	JHU077i		Homo Sapiens	SKIP004486	Normal
iPS Cell	JHU104i		Homo Sapiens	SKIP004485	Normal
iPS Cell	JHU125i		Homo Sapiens	SKIP004484	Normal
iPS Cell	JHU124i		Homo Sapiens	SKIP004483	Normal
iPS Cell	JHU171i		Homo Sapiens	SKIP004482	Normal
iPS Cell	JHU152i		Homo Sapiens	SKIP004481	Normal
iPS Cell	JHU057i		Homo Sapiens	SKIP004480	Normal
iPS Cell	JHU246i		Homo Sapiens	SKIP004479	Normal
iPS Cell	JHU176i		Homo Sapiens	SKIP004478	Normal
iPS Cell	JHU066i		Homo Sapiens	SKIP004477	Normal
iPS Cell	JHU150i		Homo Sapiens	SKIP004476	Normal
iPS Cell	JHU174i		Homo Sapiens	SKIP004475	Normal
iPS Cell	JHU065i		Homo Sapiens	SKIP004474	Normal
iPS Cell	JHU139i		Homo Sapiens	SKIP004473	Normal
iPS Cell	JHU146i		Homo Sapiens	SKIP004472	Normal
iPS Cell	JHU145i		Homo Sapiens	SKIP004471	Normal
iPS Cell	JHU143i		Homo Sapiens	SKIP004470	Normal
iPS Cell	JHU058i		Homo Sapiens	SKIP004469	Normal
iPS Cell	JHU111i		Homo Sapiens	SKIP004468	Normal
iPS Cell	JFWT2		Homo Sapiens	SKIP004467	Normal
iPS Cell	JFWT1		Homo Sapiens	SKIP004466	Normal
iPS Cell	JFWT3		Homo Sapiens	SKIP004465	Normal
iPS Cell	JFRBi3		Homo Sapiens	SKIP004464	Diseased	Limb-Girdle Muscular Dystrophy (18)
iPS Cell	JFRBi2		Homo Sapiens	SKIP004463	Diseased	Limb-Girdle Muscular Dystrophy (18)
iPS Cell	JFRBi1		Homo Sapiens	SKIP004462	Diseased	Limb-Girdle Muscular Dystrophy (18)
iPS Cell	JFRBi4		Homo Sapiens	SKIP004461	Diseased	Limb-Girdle Muscular Dystrophy (18)
iPS Cell	JFMD5		Homo Sapiens	SKIP004460	Diseased	Limb-Girdle Muscular Dystrophy (18)
iPS Cell	JFMD1		Homo Sapiens	SKIP004459	Diseased	Limb-Girdle Muscular Dystrophy (18)
iPS Cell	JFMD3		Homo Sapiens	SKIP004458	Diseased	Limb-Girdle Muscular Dystrophy (18)
iPS Cell	JFMD2		Homo Sapiens	SKIP004457	Diseased	Limb-Girdle Muscular Dystrophy (18)
iPS Cell	JFMD4		Homo Sapiens	SKIP004456	Diseased	Limb-Girdle Muscular Dystrophy (18)
iPS Cell	JFNY1		Homo Sapiens	SKIP004455	Diseased	limb-girdle muscular dystrophy (17)
iPS Cell	JFHZ1		Homo Sapiens	SKIP004454	Normal
iPS Cell	JFHZ3		Homo Sapiens	SKIP004453	Normal
iPS Cell	JFHZ2		Homo Sapiens	SKIP004452	Normal
iPS Cell	iPS(IMR90)-3		Homo Sapiens	SKIP004451	Normal
iPS Cell	iPS(IMR90)-1		Homo Sapiens	SKIP004450	Normal
iPS Cell	iPS(IMR90)-4		Homo Sapiens	SKIP004449	Normal
iPS Cell	iPS(IMR90)-2		Homo Sapiens	SKIP004448	Normal
iPS Cell	ATCC-HYS0103 Human Induced Pluripotent Stem Cells (ATCC(R) ACS-1020(TM))		Homo Sapiens	SKIP004447	Normal
iPS Cell	ATCC-HYR0103 Human Induced Pluripotent Stem Cells (ATCC(R) ACS-1007(TM))		Homo Sapiens	SKIP004446	Normal
iPS Cell	STiPS O-XX1 - Healthy Donor Control (Female)		Homo Sapiens	SKIP004445	Normal
iPS Cell	STiPS O-XX2 - Healthy Donor Control (Female)		Homo Sapiens	SKIP004444	Normal
iPS Cell	STiPS A6 - Healthy Donor Control (Female)		Homo Sapiens	SKIP004443	Normal
iPS Cell	STiPS A5 - Healthy Donor Control (Female)		Homo Sapiens	SKIP004442	Normal
iPS Cell	STiPS A4 - Healthy Donor Control (Female)		Homo Sapiens	SKIP004441	Normal
iPS Cell	STiPS A3 - Healthy Donor Control (Female)		Homo Sapiens	SKIP004440	Normal
iPS Cell	ery ED4 SiPSA - Healthy Donor Control (Female)		Homo Sapiens	SKIP004439	Normal
iPS Cell	ery ED3 SiPSA - Healthy Donor Control (Female)		Homo Sapiens	SKIP004438	Normal
iPS Cell	29a -ALS [SOD1(L144F)] - Female		Homo Sapiens	SKIP004437	Diseased	Amyotrophic Lateral Sclerosis
iPS Cell	29b - ALS [SOD1(L144F)]		Homo Sapiens	SKIP004436	Diseased	Amyotrophic Lateral Sclerosis
iPS Cell	A29c - ALS [SOD1(L144F)]		Homo Sapiens	SKIP004435	Diseased	Amyotrophic Lateral Sclerosis
iPS Cell	29d-ALS (SOD1/L144F)		Homo Sapiens	SKIP004434	Diseased	Amyotrophic Lateral Sclerosis
iPS Cell	29e-ALS (SOD1/L144F)		Homo Sapiens	SKIP004433	Diseased	Amyotrophic Lateral Sclerosis
iPS Cell	27e-ALS (SOD1/G85R)		Homo Sapiens	SKIP004432	Diseased	Amyotrophic Lateral Sclerosis
iPS Cell	20b - Healthy Donor Control (Male)		Homo Sapiens	SKIP004431	Normal
iPS Cell	18b - Healthy Donor Control (Female)		Homo Sapiens	SKIP004430	Normal
iPS Cell	18c - Healthy Donor Control (Female)		Homo Sapiens	SKIP004429	Normal
iPS Cell	18a - Healthy Donor Control (Female)		Homo Sapiens	SKIP004428	Normal
iPS Cell	15b - Healthy Donor Control (Female)		Homo Sapiens	SKIP004427	Normal
iPS Cell	ATCC-DYR0100 Human Induced Pluripotent Stem Cells (ATCC(R) ACS-1011(TM))		Homo Sapiens	SKIP004426	Normal
iPS Cell	ATCC-DYS0100 Human Induced Pluripotent Stem Cells (ATCC(R) ACS-1019(TM))		Homo Sapiens	SKIP004425	Normal
iPS Cell	SCRP1041i		Homo Sapiens	SKIP004424	Normal
iPS Cell	SCRP1031i		Homo Sapiens	SKIP004423	Normal
iPS Cell	SCRP1021i		Homo Sapiens	SKIP004422	Normal
iPS Cell	SCRP1002i		Homo Sapiens	SKIP004421	Normal
iPS Cell	SCRP9904i		Homo Sapiens	SKIP004420	Normal
iPS Cell	SCRP9805i		Homo Sapiens	SKIP004419	Normal
iPS Cell	SCRP9602i		Homo Sapiens	SKIP004418	Normal
iPS Cell	SCRP9501i		Homo Sapiens	SKIP004417	Normal
iPS Cell	SCRP9403i		Homo Sapiens	SKIP004416	Normal
iPS Cell	SCRP9301i		Homo Sapiens	SKIP004415	Normal
iPS Cell	SCRP9001i		Homo Sapiens	SKIP004414	Normal
iPS Cell	SCRP8901i		Homo Sapiens	SKIP004413	Normal
iPS Cell	SCRP8717i		Homo Sapiens	SKIP004412	Normal
iPS Cell	SCRP8601i		Homo Sapiens	SKIP004411	Normal
iPS Cell	SCRP8503i		Homo Sapiens	SKIP004410	Normal
iPS Cell	SCRP8401i		Homo Sapiens	SKIP004409	Normal
iPS Cell	SCRP8305i		Homo Sapiens	SKIP004408	Normal
iPS Cell	SCRP2506i		Homo Sapiens	SKIP004407	Normal
iPS Cell	SCRP2508i		Homo Sapiens	SKIP004406	Normal
iPS Cell	SCRP2503i		Homo Sapiens	SKIP004405	Normal
iPS Cell	SCRP8105i		Homo Sapiens	SKIP004404	Normal
iPS Cell	SCRP7903i		Homo Sapiens	SKIP004403	Normal
iPS Cell	SCRP7803i		Homo Sapiens	SKIP004402	Normal
iPS Cell	SCRP7602i		Homo Sapiens	SKIP004401	Normal
iPS Cell	SCRP7301i		Homo Sapiens	SKIP004400	Normal
iPS Cell	SCRP2411i		Homo Sapiens	SKIP004399	Normal
iPS Cell	SCRP2409i		Homo Sapiens	SKIP004398	Normal
iPS Cell	SCRP2407i		Homo Sapiens	SKIP004397	Normal
iPS Cell	SCRP6904i		Homo Sapiens	SKIP004396	Normal
iPS Cell	SCRP2310i		Homo Sapiens	SKIP004395	Normal
iPS Cell	SCRP2307i		Homo Sapiens	SKIP004394	Normal
iPS Cell	SCRP2305i		Homo Sapiens	SKIP004393	Normal
iPS Cell	SCRP6703i		Homo Sapiens	SKIP004392	Normal
iPS Cell	SCRP6504i		Homo Sapiens	SKIP004391	Normal
iPS Cell	SCRP6401i		Homo Sapiens	SKIP004390	Normal
iPS Cell	SCRP6301i		Homo Sapiens	SKIP004389	Normal
iPS Cell	SCRP2210i		Homo Sapiens	SKIP004388	Normal
iPS Cell	SCRP2211i		Homo Sapiens	SKIP004387	Normal
iPS Cell	SCRP2208i		Homo Sapiens	SKIP004386	Normal
iPS Cell	SCRP6101i		Homo Sapiens	SKIP004385	Normal
iPS Cell	SCRP6007i		Homo Sapiens	SKIP004384	Normal
iPS Cell	SCRP5803i		Homo Sapiens	SKIP004383	Normal
iPS Cell	SCRP5707i		Homo Sapiens	SKIP004382	Normal
iPS Cell	SCRP5603i		Homo Sapiens	SKIP004381	Normal
iPS Cell	SCRP2106i		Homo Sapiens	SKIP004380	Normal
iPS Cell	SCRP2115i		Homo Sapiens	SKIP004379	Normal
iPS Cell	SCRP2101i		Homo Sapiens	SKIP004378	Normal
iPS Cell	SCRP5508i		Homo Sapiens	SKIP004377	Normal
iPS Cell	SCRP5402i		Homo Sapiens	SKIP004376	Normal
iPS Cell	GM24474-iPSC		Homo Sapiens	SKIP004375	Diseased	Muscular Atrophy, Spinal
iPS Cell	GM23937-iPSC		Homo Sapiens	SKIP004374	Diseased	Tay-sachs Disease
iPS Cell	GM23913-iPSC		Homo Sapiens	SKIP004373	Diseased	Friedreich Ataxia
iPS Cell	GM23764-iPSC		Homo Sapiens	SKIP004372	Diseased	Schizophrenia
iPS Cell	GM23762-iPSC		Homo Sapiens	SKIP004371	Diseased	Schizophrenia (15)
iPS Cell	GM23761-iPSC		Homo Sapiens	SKIP004370	Diseased	Schizophrenia
iPS Cell	GM23760-iPSC		Homo Sapiens	SKIP004369	Diseased	Schizophrenia
iPS Cell	GM23720-iPSC		Homo Sapiens	SKIP004368	Normal
iPS Cell	GM23717-iPSC		Homo Sapiens	SKIP004367	Diseased	Muscular Dystrophies (2)
iPS Cell	GM23476-iPSC		Homo Sapiens	SKIP004366	Normal
iPS Cell	GM23446-iPSC		Homo Sapiens	SKIP004365	Normal
iPS Cell	GM23411-iPSC		Homo Sapiens	SKIP004364	Normal
iPS Cell	GM23404-iPSC		Homo Sapiens	SKIP004363	Diseased	Friedreich Ataxia
iPS Cell	GM23413-iPSC		Homo Sapiens	SKIP004362	Normal
iPS Cell	GM23716-iPSC		Homo Sapiens	SKIP004361	Normal
iPS Cell	GM23396-iPSC		Homo Sapiens	SKIP004360	Normal
iPS Cell	GM23394-iPSC		Homo Sapiens	SKIP004359	Normal
iPS Cell	GM23392-iPSC		Homo Sapiens	SKIP004358	Normal
iPS Cell	GM23450-iPSC		Homo Sapiens	SKIP004357	Normal
iPS Cell	GM23340-iPSC		Homo Sapiens	SKIP004356	Normal
iPS Cell	GM23338-iPSC		Homo Sapiens	SKIP004355	Normal
iPS Cell	GM23298-iPSC		Homo Sapiens	SKIP004354	Diseased	Rett Syndrome
iPS Cell	GM23280-iPSC		Homo Sapiens	SKIP004353	Normal
iPS Cell	GM23279-iPSC		Homo Sapiens	SKIP004352	Normal
iPS Cell	GM23262-iPSC		Homo Sapiens	SKIP004351	Diseased	Becker Muscular Dystrophy
iPS Cell	GM23240-iPSC		Homo Sapiens	SKIP004350	Diseased	Muscular Atrophy, Spinal
iPS Cell	GM24468-iPSC		Homo Sapiens	SKIP004349	Diseased	Muscular Atrophy, Spinal
iPS Cell	GM23232-iPSC		Homo Sapiens	SKIP004348	Diseased	Severe Combined Immunodeficiency (0)
iPS Cell	GM23230-iPSC		Homo Sapiens	SKIP004347	Diseased	Becker Muscular Dystrophy (22)
iPS Cell	GM23226-iPSC		Homo Sapiens	SKIP004346	Diseased	Diabetes Mellitus
iPS Cell	GM23225-iPSC		Homo Sapiens	SKIP004345	Diseased	Huntington Disease
iPS Cell	17a - Healthy Donor Control (Female)		Homo Sapiens	SKIP004344	Normal
iPS Cell	17b - Healthy Donor Control (Female)		Homo Sapiens	SKIP004343	Normal
iPS Cell	11c - Healthy Donor Control (Male)		Homo Sapiens	SKIP004342	Normal
iPS Cell	11b - Healthy Donor Control (Male)		Homo Sapiens	SKIP004341	Normal
iPS Cell	11a - Healthy Donor Control (Male)		Homo Sapiens	SKIP004340	Normal
iPS Cell	ATCC-DYS0530 Human Induced Pluripotent Stem Cells (ATCC(R) ACS-1013(TM))		Homo Sapiens	SKIP004339	Diseased	Asthma;Depression;Parkinson's disease
iPS Cell	ATCC-DYR0530 Human Induced Pluripotent Stem Cells (ATCC(R) ACS-1012(TM))		Homo Sapiens	SKIP004338	Diseased	Asthma;Depression;Parkinson's disease
iPS Cell	ATCC-DYP0530 Human Induced Pluripotent Stem Cells (ATCC(R) ACS-1014(TM))		Homo Sapiens	SKIP004337	Diseased	Asthma;Depression;Parkinson's disease
iPS Cell	p-hiPS02		Homo Sapiens	SKIP004336	Normal
iPS Cell	p-hiPS01		Homo Sapiens	SKIP004335	Normal
iPS Cell	ATCC-DYP0730 Human Induced Pluripotent Stem Cells (ATCC(R) ACS-1003(TM))		Homo Sapiens	SKIP004334	Diseased	Down's Syndrome (1)
iPS Cell	GD-IPS1		Homo Sapiens	SKIP004333	Diseased	Gaucher disease
iPS Cell	D551-RiPS-1.3		Homo Sapiens	SKIP004332	Normal
iPS Cell	D551-RiPS-1.1		Homo Sapiens	SKIP004331	Normal
iPS Cell	D551-RiPS-1.2		Homo Sapiens	SKIP004330	Normal
iPS Cell	ATCC-CYS0105 Human Induced Pluripotent Stem Cells (ATCC(R) ACS-1021(TM))		Homo Sapiens	SKIP004329	Normal
iPS Cell	CIRM-CW70338i-Affected		Homo Sapiens	SKIP004328	Diseased	DIABETES TYPE II
iPS Cell	CIRM-CW70322i-Affected		Homo Sapiens	SKIP004327	Diseased	AGE-RELATED MACULAR DEGENERATION; AMD;DIABETES TYPE II
iPS Cell	CIRM-CW70332i-Affected		Homo Sapiens	SKIP004326	Diseased	AGE-RELATED MACULAR DEGENERATION; AMD;DIABETES TYPE II
iPS Cell	CIRM-CW70330i-CTL		Homo Sapiens	SKIP004325	Normal
iPS Cell	CIRM-CW70325i-Affected		Homo Sapiens	SKIP004324	Diseased	DIABETES TYPE II
iPS Cell	CIRM-CW70324i-Affected		Homo Sapiens	SKIP004323	Diseased	AGE-RELATED MACULAR DEGENERATION; AMD;DIABETES TYPE II
iPS Cell	CIRM-CW70323i-Affected		Homo Sapiens	SKIP004322	Diseased	BLINDING EYE DISEASE: OTHER
iPS Cell	CIRM-CW70321i-Affected		Homo Sapiens	SKIP004321	Diseased	AGE-RELATED MACULAR DEGENERATION; AMD
iPS Cell	CIRM-CW70320i-Affected		Homo Sapiens	SKIP004320	Diseased	DIABETES TYPE I
iPS Cell	CIRM-CW70316i-CTL		Homo Sapiens	SKIP004319	Normal
iPS Cell	CIRM-CW70310i-Affected		Homo Sapiens	SKIP004318	Diseased	DIABETES TYPE II
iPS Cell	CIRM-CW70309i-Affected		Homo Sapiens	SKIP004317	Diseased	DIABETES TYPE II;DIABETIC RETINOPATHY; DR
iPS Cell	CIRM-CW70308i-Affected		Homo Sapiens	SKIP004316	Diseased	DIABETES TYPE II
iPS Cell	CIRM-CW70307i-Affected		Homo Sapiens	SKIP004315	Diseased	DIABETES TYPE II
iPS Cell	CIRM-CW70306i-Affected		Homo Sapiens	SKIP004314	Diseased	DIABETES TYPE II
iPS Cell	CIRM-CW70305i-CTL		Homo Sapiens	SKIP004313	Normal
iPS Cell	CIRM-CW70304i-Affected		Homo Sapiens	SKIP004312	Diseased	DIABETES TYPE II
iPS Cell	CIRM-CW70303i-Affected		Homo Sapiens	SKIP004311	Diseased	DIABETES TYPE II
iPS Cell	CIRM-CW70301i-CTL		Homo Sapiens	SKIP004310	Normal
iPS Cell	CIRM-CW70299i-Affected		Homo Sapiens	SKIP004309	Diseased	DIABETES TYPE II
iPS Cell	CIRM-CW70298i-Affected		Homo Sapiens	SKIP004308	Diseased	DIABETES TYPE II;GLAUCOMA, PRIMARY OPEN ANGLE; POAG
iPS Cell	CIRM-CW70297i-Affected		Homo Sapiens	SKIP004307	Diseased	DIABETES TYPE II
iPS Cell	CIRM-CW70296i-Affected		Homo Sapiens	SKIP004306	Diseased	DIABETES TYPE I;DIABETIC RETINOPATHY; DR
iPS Cell	CIRM-CW70292i-Affected		Homo Sapiens	SKIP004305	Diseased	AGE-RELATED MACULAR DEGENERATION; AMD
iPS Cell	CIRM-CW70289i-Affected		Homo Sapiens	SKIP004304	Diseased	AGE-RELATED MACULAR DEGENERATION; AMD
iPS Cell	CIRM-CW70287i-Affected		Homo Sapiens	SKIP004303	Diseased	AGE-RELATED MACULAR DEGENERATION; AMD;DIABETES TYPE II
iPS Cell	CIRM-CW70286i-Affected		Homo Sapiens	SKIP004302	Diseased	AGE-RELATED MACULAR DEGENERATION; AMD;GLAUCOMA, PRIMARY OPEN ANGLE; POAG
iPS Cell	CIRM-CW70284i-Affected		Homo Sapiens	SKIP004301	Diseased	DIABETES TYPE II
iPS Cell	CIRM-CW70282i-CTL		Homo Sapiens	SKIP004300	Normal
iPS Cell	CIRM-CW70281i-Affected		Homo Sapiens	SKIP004299	Diseased	DIABETES TYPE II
iPS Cell	CIRM-CW70280i-Affected		Homo Sapiens	SKIP004298	Diseased	DIABETES TYPE II;DIABETIC RETINOPATHY; DR
iPS Cell	CIRM-CW70278i-Affected		Homo Sapiens	SKIP004297	Diseased	DIABETES TYPE II
iPS Cell	CIRM-CW70276i-Affected		Homo Sapiens	SKIP004296	Diseased	DIABETES TYPE II
iPS Cell	CIRM-CW70275i-Affected		Homo Sapiens	SKIP004295	Diseased	DIABETES TYPE II
iPS Cell	CIRM-CW70273i-Affected		Homo Sapiens	SKIP004294	Diseased	GLAUCOMA, PRIMARY OPEN ANGLE; POAG
iPS Cell	CIRM-CW70272i-Affected		Homo Sapiens	SKIP004293	Diseased	DIABETES TYPE II
iPS Cell	CIRM-CW70269i-Affected		Homo Sapiens	SKIP004292	Diseased	DIABETES TYPE II
iPS Cell	CIRM-CW70267i-CTL		Homo Sapiens	SKIP004291	Normal
iPS Cell	CIRM-CW70266i-Affected		Homo Sapiens	SKIP004290	Diseased	DIABETES TYPE II;DIABETIC RETINOPATHY; DR
iPS Cell	CIRM-CW70264i-Affected		Homo Sapiens	SKIP004289	Diseased	DIABETES TYPE II;DIABETIC RETINOPATHY; DR
iPS Cell	CIRM-CW70263i-Affected		Homo Sapiens	SKIP004288	Diseased	DIABETES TYPE II;DIABETIC RETINOPATHY; DR
iPS Cell	CIRM-CW70262i-CTL		Homo Sapiens	SKIP004287	Normal
iPS Cell	CIRM-CW70260i-Affected		Homo Sapiens	SKIP004286	Diseased	AGE-RELATED MACULAR DEGENERATION; AMD
iPS Cell	CIRM-CW70257i-Affected		Homo Sapiens	SKIP004285	Diseased	DIABETES TYPE II
iPS Cell	CIRM-CW70256i-CTL		Homo Sapiens	SKIP004284	Normal
iPS Cell	CIRM-CW70254i-Affected		Homo Sapiens	SKIP004283	Diseased	DIABETES TYPE I
iPS Cell	CIRM-CW70253i-Affected		Homo Sapiens	SKIP004282	Diseased	BLINDING EYE DISEASE: OTHER
iPS Cell	CIRM-CW70251i-CTL		Homo Sapiens	SKIP004281	Normal
iPS Cell	CIRM-CW70250i-Affected		Homo Sapiens	SKIP004280	Diseased	AGE-RELATED MACULAR DEGENERATION; AMD
iPS Cell	CIRM-CW70249i-Affected		Homo Sapiens	SKIP004279	Diseased	AGE-RELATED MACULAR DEGENERATION; AMD
iPS Cell	CIRM-CW70247i-Affected		Homo Sapiens	SKIP004278	Diseased	AGE-RELATED MACULAR DEGENERATION; AMD
iPS Cell	CIRM-CW70245i-Affected		Homo Sapiens	SKIP004277	Diseased	AGE-RELATED MACULAR DEGENERATION; AMD
iPS Cell	CIRM-CW70244i-Affected		Homo Sapiens	SKIP004276	Diseased	AGE-RELATED MACULAR DEGENERATION; AMD
iPS Cell	CIRM-CW70241i-CTL		Homo Sapiens	SKIP004275	Normal
iPS Cell	CIRM-CW70240i-Affected		Homo Sapiens	SKIP004274	Diseased	AGE-RELATED MACULAR DEGENERATION; AMD
iPS Cell	CIRM-CW70239i-Affected		Homo Sapiens	SKIP004273	Diseased	DIABETES TYPE II
iPS Cell	CIRM-CW70230i-Affected		Homo Sapiens	SKIP004272	Diseased	DIABETIC, NO RETINOPATHY | DIABETES TYPE II
iPS Cell	CIRM-CW70229i-Affected		Homo Sapiens	SKIP004271	Diseased	AGE-RELATED MACULAR DEGENERATION; AMD
iPS Cell	CIRM-CW70226i-Affected		Homo Sapiens	SKIP004270	Diseased	AGE-RELATED MACULAR DEGENERATION; AMD
iPS Cell	CIRM-CW70225i-CTL		Homo Sapiens	SKIP004269	Normal
iPS Cell	CIRM-CW70221i-CTL		Homo Sapiens	SKIP004268	Diseased	Asthema;Chronic Lung Disease -Self reported
iPS Cell	CIRM-CW70217i-Affected		Homo Sapiens	SKIP004267	Diseased	AGE-RELATED MACULAR DEGENERATION; AMD
iPS Cell	CIRM-CW70216i-Affected		Homo Sapiens	SKIP004266	Diseased	AGE-RELATED MACULAR DEGENERATION; AMD
iPS Cell	CIRM-CW70215i-Affected		Homo Sapiens	SKIP004265	Diseased	AGE-RELATED MACULAR DEGENERATION; AMD
iPS Cell	CIRM-CW70212i-Affected		Homo Sapiens	SKIP004264	Diseased	AGE-RELATED MACULAR DEGENERATION; AMD
iPS Cell	CIRM-CW70211i-Affected		Homo Sapiens	SKIP004263	Diseased	DIABETES TYPE II;DIABETIC RETINOPATHY; DR;GLAUCOMA, PRIMARY OPEN ANGLE; POAG
iPS Cell	CIRM-CW70210i-Affected		Homo Sapiens	SKIP004262	Diseased	AGE-RELATED MACULAR DEGENERATION; AMD
iPS Cell	CIRM-CW70208i-Affected		Homo Sapiens	SKIP004261	Diseased	DIABETES TYPE I
iPS Cell	CIRM-CW70207i-CTL		Homo Sapiens	SKIP004260	Normal
iPS Cell	CIRM-CW70205i-CTL		Homo Sapiens	SKIP004259	Normal
iPS Cell	CIRM-CW70198i-Affected		Homo Sapiens	SKIP004258	Diseased	AGE-RELATED MACULAR DEGENERATION; AMD
iPS Cell	CIRM-CW70195i-Affected		Homo Sapiens	SKIP004257	Diseased	DIABETES TYPE II;DIABETIC RETINOPATHY; DR
iPS Cell	CIRM-CW70194i-Affected		Homo Sapiens	SKIP004256	Diseased	AGE-RELATED MACULAR DEGENERATION; AMD;GLAUCOMA, PRIMARY OPEN ANGLE; POAG
iPS Cell	CIRM-CW70193i-Affected		Homo Sapiens	SKIP004255	Diseased	AGE-RELATED MACULAR DEGENERATION; AMD
iPS Cell	CIRM-CW70191i-Affected		Homo Sapiens	SKIP004254	Diseased	BLINDING EYE DISEASE: OTHER
iPS Cell	CIRM-CW70190i-Affected		Homo Sapiens	SKIP004253	Diseased	GLAUCOMA, PRIMARY OPEN ANGLE; POAG
iPS Cell	CIRM-CW70189i-Affected		Homo Sapiens	SKIP004252	Diseased	GLAUCOMA, PRIMARY OPEN ANGLE; POAG
iPS Cell	CIRM-CW70188i-Affected		Homo Sapiens	SKIP004251	Diseased	DIABETES TYPE II;DIABETIC RETINOPATHY; DR
iPS Cell	CIRM-CW70186i-Affected		Homo Sapiens	SKIP004250	Diseased	AGE-RELATED MACULAR DEGENERATION; AMD
iPS Cell	CIRM-CW70185i-Affected		Homo Sapiens	SKIP004249	Diseased	DIABETES TYPE II;DIABETIC RETINOPATHY; DR
iPS Cell	CIRM-CW70184i-Affected		Homo Sapiens	SKIP004248	Diseased	AGE-RELATED MACULAR DEGENERATION; AMD;DIABETES TYPE II;GLAUCOMA, PRIMARY OPEN ANGLE; POAG
iPS Cell	CIRM-CW70182i-Affected		Homo Sapiens	SKIP004247	Diseased	AGE-RELATED MACULAR DEGENERATION; AMD
iPS Cell	CIRM-CW70181i-Affected		Homo Sapiens	SKIP004246	Diseased	BLINDING EYE DISEASE: OTHER
iPS Cell	CIRM-CW70180i-Affected		Homo Sapiens	SKIP004245	Diseased	DIABETES TYPE II;DIABETIC RETINOPATHY; DR
iPS Cell	CIRM-CW70178i-Affected		Homo Sapiens	SKIP004244	Diseased	DIABETIC RETINOPATHY; DR | DIABETES TYPE II
iPS Cell	CIRM-CW70175i-Affected		Homo Sapiens	SKIP004243	Diseased	DIABETES TYPE II
iPS Cell	CIRM-CW70174i-Affected		Homo Sapiens	SKIP004242	Diseased	DIABETES TYPE II
iPS Cell	CIRM-CW70173i-Affected		Homo Sapiens	SKIP004241	Diseased	DIABETES TYPE II;DIABETIC RETINOPATHY; DR
iPS Cell	CIRM-CW70170i-Affected		Homo Sapiens	SKIP004240	Diseased	DIABETES TYPE II
iPS Cell	CIRM-CW70168i-Affected		Homo Sapiens	SKIP004239	Diseased	AGE-RELATED MACULAR DEGENERATION; AMD
iPS Cell	CIRM-CW70167i-Affected		Homo Sapiens	SKIP004238	Diseased	AGE-RELATED MACULAR DEGENERATION; AMD
iPS Cell	CIRM-CW70165i-Affected		Homo Sapiens	SKIP004237	Diseased	AGE-RELATED MACULAR DEGENERATION; AMD;GLAUCOMA, PRIMARY OPEN ANGLE; POAG
iPS Cell	CIRM-CW70164i-Affected		Homo Sapiens	SKIP004236	Diseased	AGE-RELATED MACULAR DEGENERATION; AMD;GLAUCOMA, PRIMARY OPEN ANGLE; POAG
iPS Cell	CIRM-CW70160i-Affected		Homo Sapiens	SKIP004235	Diseased	DIABETES TYPE II;DIABETIC RETINOPATHY; DR
iPS Cell	CIRM-CW70159i-Affected		Homo Sapiens	SKIP004234	Diseased	DIABETES TYPE II
iPS Cell	CIRM-CW70157i-Affected		Homo Sapiens	SKIP004233	Diseased	AGE-RELATED MACULAR DEGENERATION; AMD
iPS Cell	CIRM-CW70156i-Affected		Homo Sapiens	SKIP004232	Diseased	AGE-RELATED MACULAR DEGENERATION; AMD
iPS Cell	CIRM-CW70152i-Affected		Homo Sapiens	SKIP004231	Diseased	AGE-RELATED MACULAR DEGENERATION; AMD
iPS Cell	CIRM-CW70151i-Affected		Homo Sapiens	SKIP004230	Diseased	AGE-RELATED MACULAR DEGENERATION; AMD
iPS Cell	CIRM-CW70144i-Affected		Homo Sapiens	SKIP004229	Diseased	AGE-RELATED MACULAR DEGENERATION; AMD
iPS Cell	CIRM-CW70142i-Affected		Homo Sapiens	SKIP004228	Diseased	AGE-RELATED MACULAR DEGENERATION; AMD | DIABETIC, NO RETINOPATHY
iPS Cell	CIRM-CW70141i-Affected		Homo Sapiens	SKIP004227	Diseased	AGE-RELATED MACULAR DEGENERATION; AMD
iPS Cell	CIRM-CW70139i-Affected		Homo Sapiens	SKIP004226	Diseased	AGE-RELATED MACULAR DEGENERATION; AMD
iPS Cell	CIRM-CW70137i-Affected		Homo Sapiens	SKIP004225	Diseased	AGE-RELATED MACULAR DEGENERATION; AMD
iPS Cell	CIRM-CW70136i-Affected		Homo Sapiens	SKIP004224	Diseased	AGE-RELATED MACULAR DEGENERATION; AMD;GLAUCOMA, PRIMARY OPEN ANGLE; POAG
iPS Cell	CIRM-CW70135i-Affected		Homo Sapiens	SKIP004223	Diseased	AGE-RELATED MACULAR DEGENERATION; AMD
iPS Cell	CIRM-CW70134i-Affected		Homo Sapiens	SKIP004222	Diseased	AGE-RELATED MACULAR DEGENERATION; AMD
iPS Cell	CIRM-CW70130i-Affected		Homo Sapiens	SKIP004221	Diseased	AGE-RELATED MACULAR DEGENERATION; AMD;GLAUCOMA, PRIMARY OPEN ANGLE; POAG
iPS Cell	CIRM-CW70129i-Affected		Homo Sapiens	SKIP004220	Diseased	DIABETIC RETINOPATHY; DR | DIABETES TYPE I
iPS Cell	CIRM-CW70128i-Affected		Homo Sapiens	SKIP004219	Diseased	AGE-RELATED MACULAR DEGENERATION; AMD
iPS Cell	CIRM-CW70127i-Affected		Homo Sapiens	SKIP004218	Diseased	AGE-RELATED MACULAR DEGENERATION; AMD
iPS Cell	CIRM-CW70125i-Affected		Homo Sapiens	SKIP004217	Diseased	AGE-RELATED MACULAR DEGENERATION; AMD
iPS Cell	CIRM-CW70124i-Affected		Homo Sapiens	SKIP004216	Diseased	DIABETES TYPE II
iPS Cell	CIRM-CW70123i-Affected		Homo Sapiens	SKIP004215	Diseased	AGE-RELATED MACULAR DEGENERATION; AMD
iPS Cell	CIRM-CW70122i-Affected		Homo Sapiens	SKIP004214	Diseased	AGE-RELATED MACULAR DEGENERATION; AMD
iPS Cell	CIRM-CW70117i-Affected		Homo Sapiens	SKIP004213	Diseased	AGE-RELATED MACULAR DEGENERATION; AMD
iPS Cell	CIRM-CW70116i-Affected		Homo Sapiens	SKIP004212	Diseased	DIABETIC RETINOPATHY; DR | DIABETES TYPE II
iPS Cell	CIRM-CW70114i-Affected		Homo Sapiens	SKIP004211	Diseased	AGE-RELATED MACULAR DEGENERATION; AMD;GLAUCOMA, PRIMARY OPEN ANGLE; POAG
iPS Cell	CIRM-CW70112i-Affected		Homo Sapiens	SKIP004210	Diseased	AGE-RELATED MACULAR DEGENERATION; AMD
iPS Cell	CIRM-CW70111i-Affected		Homo Sapiens	SKIP004209	Diseased	AGE-RELATED MACULAR DEGENERATION; AMD;DIABETIC RETINOPATHY; DR
iPS Cell	CIRM-CW70110i-Affected		Homo Sapiens	SKIP004208	Diseased	AGE-RELATED MACULAR DEGENERATION; AMD
iPS Cell	CIRM-CW70109i-Affected		Homo Sapiens	SKIP004207	Diseased	GLAUCOMA, PRIMARY OPEN ANGLE; POAG
iPS Cell	CIRM-CW70108i-Affected		Homo Sapiens	SKIP004206	Diseased	AGE-RELATED MACULAR DEGENERATION; AMD
iPS Cell	CIRM-CW70107i-Affected		Homo Sapiens	SKIP004205	Diseased	AGE-RELATED MACULAR DEGENERATION; AMD
iPS Cell	CIRM-CW70105i-Affected		Homo Sapiens	SKIP004204	Diseased	AGE-RELATED MACULAR DEGENERATION; AMD
iPS Cell	CIRM-CW70102i-Affected		Homo Sapiens	SKIP004203	Diseased	AGE-RELATED MACULAR DEGENERATION; AMD
iPS Cell	CIRM-CW70098i-Affected		Homo Sapiens	SKIP004202	Diseased	DIABETES TYPE II;DIABETIC RETINOPATHY; DR
iPS Cell	CIRM-CW70096i-Affected		Homo Sapiens	SKIP004201	Diseased	AGE-RELATED MACULAR DEGENERATION; AMD
iPS Cell	CIRM-CW70095i-Affected		Homo Sapiens	SKIP004200	Diseased	AGE-RELATED MACULAR DEGENERATION; AMD;DIABETIC, NO RETINOPATHY | DIABETES TYPE II
iPS Cell	CIRM-CW70094i-Affected		Homo Sapiens	SKIP004199	Diseased	GLAUCOMA, PRIMARY OPEN ANGLE; POAG
iPS Cell	CIRM-CW70094i-Affected		Homo Sapiens	SKIP004198	Diseased	GLAUCOMA, PRIMARY OPEN ANGLE; POAG
iPS Cell	CIRM-CW70093i-Affected		Homo Sapiens	SKIP004197	Diseased	GLAUCOMA, PRIMARY OPEN ANGLE; POAG
iPS Cell	CIRM-CW70091i-Affected		Homo Sapiens	SKIP004196	Diseased	DIABETIC RETINOPATHY; DR | DIABETES TYPE I
iPS Cell	CIRM-CW70089i-Affected		Homo Sapiens	SKIP004195	Diseased	AGE-RELATED MACULAR DEGENERATION; AMD
iPS Cell	CIRM-CW70088i-Affected		Homo Sapiens	SKIP004194	Diseased	AGE-RELATED MACULAR DEGENERATION; AMD
iPS Cell	CIRM-CW70087i-Affected		Homo Sapiens	SKIP004193	Diseased	AGE-RELATED MACULAR DEGENERATION; AMD
iPS Cell	CIRM-CW70085i-Affected		Homo Sapiens	SKIP004192	Diseased	DIABETES TYPE I;DIABETIC RETINOPATHY; DR
iPS Cell	CIRM-CW70083i-Affected		Homo Sapiens	SKIP004191	Diseased	DIABETIC RETINOPATHY; DR | DIABETES TYPE II
iPS Cell	CIRM-CW70082i-Affected		Homo Sapiens	SKIP004190	Diseased	DIABETIC, NO RETINOPATHY | DIABETES TYPE II
iPS Cell	CIRM-CW70081i-Affected		Homo Sapiens	SKIP004189	Diseased	AGE-RELATED MACULAR DEGENERATION; AMD
iPS Cell	CIRM-CW70080i-Affected		Homo Sapiens	SKIP004188	Diseased	DIABETIC, NO RETINOPATHY | DIABETES TYPE II
iPS Cell	CIRM-CW70079i-Ctl		Homo Sapiens	SKIP004187	Normal
iPS Cell	CIRM-CW70077i-Affected		Homo Sapiens	SKIP004186	Diseased	DIABETIC RETINOPATHY; DR | DIABETES TYPE II
iPS Cell	CIRM-CW70075i-Affected		Homo Sapiens	SKIP004185	Diseased	DIABETIC RETINOPATHY; DR | DIABETES TYPE II
iPS Cell	CIRM-CW70071i-Affected		Homo Sapiens	SKIP004184	Diseased	AGE-RELATED MACULAR DEGENERATION; AMD
iPS Cell	CIRM-CW70067i-Ctl		Homo Sapiens	SKIP004183	Normal
iPS Cell	CIRM-CW70064i-Affected		Homo Sapiens	SKIP004182	Diseased	DIABETES TYPE I;DIABETIC RETINOPATHY; DR
iPS Cell	CIRM-CW70063i-Affected		Homo Sapiens	SKIP004181	Diseased	BLINDING EYE DISEASE: OTHER
iPS Cell	CIRM-CW70061i-Affected		Homo Sapiens	SKIP004180	Diseased	GLAUCOMA, PRIMARY OPEN ANGLE; POAG
iPS Cell	CIRM-CW70059i-Affected		Homo Sapiens	SKIP004179	Diseased	AGE-RELATED MACULAR DEGENERATION; AMD
iPS Cell	CIRM-CW70056i-Affected		Homo Sapiens	SKIP004178	Diseased	AGE-RELATED MACULAR DEGENERATION; AMD;DIABETIC RETINOPATHY; DR
iPS Cell	CIRM-CW70055i-Affected		Homo Sapiens	SKIP004177	Diseased	AGE-RELATED MACULAR DEGENERATION; AMD
iPS Cell	CIRM-CW70054i-Ctl		Homo Sapiens	SKIP004176	Normal
iPS Cell	CIRM-CW70052i-Affected		Homo Sapiens	SKIP004175	Diseased	DIABETIC, NO RETINOPATHY | DIABETES TYPE I
iPS Cell	CIRM-CW70051i-Affected		Homo Sapiens	SKIP004174	Diseased	DIABETIC, NO RETINOPATHY | DIABETES TYPE II
iPS Cell	CIRM-CW70050i-Affected		Homo Sapiens	SKIP004173	Diseased	DIABETIC, NO RETINOPATHY | DIABETES TYPE II
iPS Cell	CIRM-CW70049i-Affected		Homo Sapiens	SKIP004172	Diseased	AGE-RELATED MACULAR DEGENERATION; AMD
iPS Cell	CIRM-CW70048i-Affected		Homo Sapiens	SKIP004171	Diseased	DIABETIC, NO RETINOPATHY | DIABETES TYPE II
iPS Cell	CIRM-CW70047i-Affected		Homo Sapiens	SKIP004170	Diseased	DIABETES TYPE II
iPS Cell	CIRM-CW70045i-Affected		Homo Sapiens	SKIP004169	Diseased	AGE-RELATED MACULAR DEGENERATION; AMD
iPS Cell	CIRM-CW70044i-Affected		Homo Sapiens	SKIP004168	Diseased	DIABETIC, NO RETINOPATHY | DIABETES TYPE II
iPS Cell	CIRM-CW70043i-Affected		Homo Sapiens	SKIP004167	Diseased	AGE-RELATED MACULAR DEGENERATION; AMD
iPS Cell	CIRM-CW70042i-Affected		Homo Sapiens	SKIP004166	Diseased	DIABETIC, NO RETINOPATHY | DIABETES TYPE II
iPS Cell	CIRM-CW70041i-Affected		Homo Sapiens	SKIP004165	Diseased	AGE-RELATED MACULAR DEGENERATION; AMD
iPS Cell	CIRM-CW70040i-Affected		Homo Sapiens	SKIP004164	Diseased	DIABETIC, NO RETINOPATHY | DIABETES TYPE II
iPS Cell	CIRM-CW70039i-Affected		Homo Sapiens	SKIP004163	Diseased	AGE-RELATED MACULAR DEGENERATION; AMD
iPS Cell	CIRM-CW70038i-Affected		Homo Sapiens	SKIP004162	Diseased	AGE-RELATED MACULAR DEGENERATION; AMD
iPS Cell	CIRM-CW70037i-Affected		Homo Sapiens	SKIP004161	Diseased	DIABETIC, NO RETINOPATHY | DIABETES TYPE I
iPS Cell	CIRM-CW70036i-Affected		Homo Sapiens	SKIP004160	Diseased	DIABETIC RETINOPATHY; DR | DIABETES TYPE II
iPS Cell	CIRM-CW70035i-Affected		Homo Sapiens	SKIP004159	Diseased	DIABETIC RETINOPATHY; DR | DIABETES TYPE I
iPS Cell	CIRM-CW70034i-Affected		Homo Sapiens	SKIP004158	Diseased	DIABETIC, NO RETINOPATHY | DIABETES TYPE II
iPS Cell	CIRM-CW70032i-Affected		Homo Sapiens	SKIP004157	Diseased	DIABETES TYPE II
iPS Cell	CIRM-CW70031i-Affected		Homo Sapiens	SKIP004156	Diseased	DIABETES TYPE II
iPS Cell	CIRM-CW70030i-CTL		Homo Sapiens	SKIP004155	Normal
iPS Cell	CIRM-CW70029i-Affected		Homo Sapiens	SKIP004154	Diseased	DIABETES TYPE I
iPS Cell	CIRM-CW70028i-Affected		Homo Sapiens	SKIP004153	Diseased	DIABETES TYPE I
iPS Cell	CIRM-CW70022i-Affected		Homo Sapiens	SKIP004152	Diseased	DIABETES TYPE I;DIABETIC RETINOPATHY; DR
iPS Cell	CIRM-CW70021i-Affected		Homo Sapiens	SKIP004151	Diseased	AGE-RELATED MACULAR DEGENERATION; AMD
iPS Cell	CIRM-CW70019i-Ctl		Homo Sapiens	SKIP004150	Normal
iPS Cell	CIRM-CW70018i-Affected		Homo Sapiens	SKIP004149	Diseased	DIABETIC, NO RETINOPATHY | DIABETES TYPE II
iPS Cell	CIRM-CW70017i-Affected		Homo Sapiens	SKIP004148	Diseased	DIABETIC, NO RETINOPATHY | DIABETES TYPE II
iPS Cell	CIRM-CW70015i-Ctl		Homo Sapiens	SKIP004147	Normal
iPS Cell	CIRM-CW70014i-Affected		Homo Sapiens	SKIP004146	Diseased	AGE-RELATED MACULAR DEGENERATION; AMD;GLAUCOMA, PRIMARY OPEN ANGLE; POAG
iPS Cell	CIRM-CW70013i-Affected		Homo Sapiens	SKIP004145	Diseased	AGE-RELATED MACULAR DEGENERATION; AMD
iPS Cell	CIRM-CW70012i-Affected		Homo Sapiens	SKIP004144	Diseased	AGE-RELATED MACULAR DEGENERATION; AMD
iPS Cell	CIRM-CW70011i-Affected		Homo Sapiens	SKIP004143	Diseased	AGE-RELATED MACULAR DEGENERATION; AMD
iPS Cell	CIRM-CW70010i-Affected		Homo Sapiens	SKIP004142	Diseased	AGE-RELATED MACULAR DEGENERATION; AMD
iPS Cell	CIRM-CW70009i-Affected		Homo Sapiens	SKIP004141	Diseased	AGE-RELATED MACULAR DEGENERATION; AMD
iPS Cell	CIRM-CW70008i-Affected		Homo Sapiens	SKIP004140	Diseased	AGE-RELATED MACULAR DEGENERATION; AMD
iPS Cell	CIRM-CW70007i-Affected		Homo Sapiens	SKIP004139	Diseased	AGE-RELATED MACULAR DEGENERATION; AMD
iPS Cell	CIRM-CW70006i-Affected		Homo Sapiens	SKIP004138	Diseased	AGE-RELATED MACULAR DEGENERATION; AMD
iPS Cell	CIRM-CW70005i-Affected		Homo Sapiens	SKIP004137	Diseased	GLAUCOMA, PRIMARY OPEN ANGLE; POAG
iPS Cell	CIRM-CW70004i-Affected		Homo Sapiens	SKIP004136	Diseased	DIABETIC RETINOPATHY; DR | DIABETES TYPE II
iPS Cell	CIRM-CW70002i-Affected		Homo Sapiens	SKIP004135	Diseased	DIABETIC, NO RETINOPATHY | DIABETES TYPE II
iPS Cell	CIRM-CW70001i-Ctl		Homo Sapiens	SKIP004134	Normal
iPS Cell	CIRM-CW60272i-Affected		Homo Sapiens	SKIP004133	Diseased	Cerebral Palsy (3)
iPS Cell	CIRM-CW60264i-Affected		Homo Sapiens	SKIP004132	Diseased	CEREBRAL PALSY; CP (2)
iPS Cell	CIRM-CW60239i-Affected		Homo Sapiens	SKIP004131	Diseased	CEREBRAL PALSY; CP (2);EPILEPSY (2)
iPS Cell	CIRM-CW60237i-Ctl		Homo Sapiens	SKIP004130	Normal
iPS Cell	CIRM-CW60236i-Affected		Homo Sapiens	SKIP004129	Diseased	EPILEPSY (8)
iPS Cell	CIRM-CW60234i-Affected		Homo Sapiens	SKIP004128	Diseased	EPILEPSY (9)
iPS Cell	CIRM-CW60232i-Affected		Homo Sapiens	SKIP004127	Diseased	AUTISM SPECTRUM DISORDER; ASD (34)
iPS Cell	CIRM-CW60230i-Affected		Homo Sapiens	SKIP004126	Diseased	AUTISM SPECTRUM DISORDER; ASD (3)
iPS Cell	CIRM-CW60226i-Affected		Homo Sapiens	SKIP004125	Diseased	EPILEPSY (14)
iPS Cell	CIRM-CW60224i-Affected		Homo Sapiens	SKIP004124	Diseased	CEREBRAL PALSY; CP (5 months);EPILEPSY (5 months)
iPS Cell	CIRM-CW60220i-Ctl		Homo Sapiens	SKIP004123	Normal
iPS Cell	CIRM-CW60219i-Affected		Homo Sapiens	SKIP004122	Diseased	AUTISM SPECTRUM DISORDER; ASD (11)
iPS Cell	CIRM-CW60217i-Affected		Homo Sapiens	SKIP004121	Diseased	AUTISM SPECTRUM DISORDER; ASD (3)
iPS Cell	CIRM-CW60187i-Affected		Homo Sapiens	SKIP004120	Diseased	AUTISM SPECTRUM DISORDER; ASD (3)
iPS Cell	CIRM-CW60171i-Affected		Homo Sapiens	SKIP004119	Diseased	AUTISM SPECTRUM DISORDER; ASD (37)
iPS Cell	CIRM-CW60164i-Affected		Homo Sapiens	SKIP004118	Diseased	INTELLECTUAL DISABILITY; ID (4)
iPS Cell	CIRM-CW60161i-Ctl		Homo Sapiens	SKIP004117	Normal
iPS Cell	CIRM-CW60142i-Affected		Homo Sapiens	SKIP004116	Diseased	EPILEPSY (12)
iPS Cell	CIRM-CW60141i-Ctl		Homo Sapiens	SKIP004115	Normal
iPS Cell	CIRM-CW60134i-Ctl		Homo Sapiens	SKIP004114	Normal
iPS Cell	CIRM-CW60133i-Affected		Homo Sapiens	SKIP004113	Diseased	CEREBRAL PALSY; CP (3);INTELLECTUAL DISABILITY; ID (3)
iPS Cell	CIRM-CW60132i-Ctl		Homo Sapiens	SKIP004112	Normal
iPS Cell	CIRM-CW60118i-Affected		Homo Sapiens	SKIP004111	Diseased	AUTISM SPECTRUM DISORDER; ASD (5);EPILEPSY (5)
iPS Cell	CIRM-CW60115i-Affected		Homo Sapiens	SKIP004110	Diseased	AUTISM SPECTRUM DISORDER; ASD (3)
iPS Cell	CIRM-CW60111i-Affected		Homo Sapiens	SKIP004109	Diseased	AUTISM SPECTRUM DISORDER; ASD (35)
iPS Cell	CIRM-CW60110i-Affected		Homo Sapiens	SKIP004108	Diseased	AUTISM SPECTRUM DISORDER; ASD
iPS Cell	CIRM-CW60109i-Ctl		Homo Sapiens	SKIP004107	Normal
iPS Cell	CIRM-CW60108i-Affected		Homo Sapiens	SKIP004106	Diseased	AUTISM SPECTRUM DISORDER; ASD (2)
iPS Cell	CIRM-CW60098i-Ctl		Homo Sapiens	SKIP004105	Normal
iPS Cell	CIRM-CW60089i-Affected		Homo Sapiens	SKIP004104	Diseased	AUTISM SPECTRUM DISORDER; ASD (3);CEREBRAL PALSY; CP (3)
iPS Cell	CIRM-CW60083i-Affected		Homo Sapiens	SKIP004103	Diseased	EPILEPSY (12);INTELLECTUAL DISABILITY; ID (12)
iPS Cell	CIRM-CW60060i-Ctl		Homo Sapiens	SKIP004102	Normal
iPS Cell	CIRM-CW60056i-Affected		Homo Sapiens	SKIP004101	Diseased	INTELLECTUAL DISABILITY; ID (6)
iPS Cell	CIRM-CW60049i-Affected		Homo Sapiens	SKIP004100	Diseased	EPILEPSY (12);INTELLECTUAL DISABILITY; ID (12)
iPS Cell	CIRM-CW60048i-Affected		Homo Sapiens	SKIP004099	Diseased	EPILEPSY (4);INTELLECTUAL DISABILITY; ID (4)
iPS Cell	CIRM-CW60046i-Affected		Homo Sapiens	SKIP004098	Diseased	EPILEPSY (9)
iPS Cell	CIRM-CW60045i-Ctl		Homo Sapiens	SKIP004097	Normal
iPS Cell	CIRM-CW60040i-Ctl		Homo Sapiens	SKIP004096	Normal
iPS Cell	CIRM-CW60097i-Ctl		Homo Sapiens	SKIP004095	Normal
iPS Cell	CIRM-CW60034i-CTL		Homo Sapiens	SKIP004094	Normal
iPS Cell	CIRM-CW60029i-Affected		Homo Sapiens	SKIP004093	Diseased	AUTISM SPECTRUM DISORDER; ASD (37)
iPS Cell	CIRM-CW60026i-Affected		Homo Sapiens	SKIP004092	Diseased	Cerebral Palsy (2)
iPS Cell	CIRM-CW60024i-Affected		Homo Sapiens	SKIP004091	Diseased	AUTISM SPECTRUM DISORDER; ASD (3);EPILEPSY (3)
iPS Cell	CIRM-CW60021i-Affected		Homo Sapiens	SKIP004090	Diseased	AUTISM SPECTRUM DISORDER; ASD (1);EPILEPSY (1)
iPS Cell	CIRM-CW60221i-Affected		Homo Sapiens	SKIP004089	Diseased	AUTISM SPECTRUM DISORDER; ASD (1);EPILEPSY (1)
iPS Cell	CIRM-CW60018i-Affected		Homo Sapiens	SKIP004088	Diseased	CEREBRAL PALSY; CP (3);EPILEPSY (3)
iPS Cell	CIRM-CW60014i-Ctl		Homo Sapiens	SKIP004087	Normal
iPS Cell	CIRM-CW60013i-Ctl		Homo Sapiens	SKIP004086	Normal
iPS Cell	CIRM-CW50099i-CTL		Homo Sapiens	SKIP004085	Normal
iPS Cell	CIRM-CW50097i-Ctl		Homo Sapiens	SKIP004084	Normal
iPS Cell	CIRM-CW50095i-CTL		Homo Sapiens	SKIP004083	Normal
iPS Cell	CIRM-CW50094i-CTL		Homo Sapiens	SKIP004082	Normal
iPS Cell	CIRM-CW50086i-CTL		Homo Sapiens	SKIP004081	Normal
iPS Cell	CIRM-CW50082i-Affected		Homo Sapiens	SKIP004080	Diseased	ALZHEIMER DISEASE; AD (65)
iPS Cell	CIRM-CW50071i-CTL		Homo Sapiens	SKIP004079	Normal
iPS Cell	CIRM-CW50070i-Ctl		Homo Sapiens	SKIP004078	Normal
iPS Cell	CIRM-CW50069i-Affected		Homo Sapiens	SKIP004077	Diseased	ALZHEIMER DISEASE; AD
iPS Cell	CIRM-CW50067i-CTL		Homo Sapiens	SKIP004076	Normal
iPS Cell	CIRM-CW50066i-Ctl		Homo Sapiens	SKIP004075	Normal
iPS Cell	CIRM-CW50065i-Ctl		Homo Sapiens	SKIP004074	Normal
iPS Cell	CIRM-CW50059i-Ctl		Homo Sapiens	SKIP004073	Normal
iPS Cell	CIRM-CW50056i-Ctl		Homo Sapiens	SKIP004072	Normal
iPS Cell	CIRM-CW50055i-Ctl		Homo Sapiens	SKIP004071	Normal
iPS Cell	CIRM-CW50054i-Ctl		Homo Sapiens	SKIP004070	Normal
iPS Cell	CIRM-CW50052i-Affected		Homo Sapiens	SKIP004069	Diseased	ALZHEIMER DISEASE; AD
iPS Cell	CIRM-CW50051i-CTL		Homo Sapiens	SKIP004068	Normal
iPS Cell	CIRM-CW50050i-Ctl		Homo Sapiens	SKIP004067	Normal
iPS Cell	CIRM-CW50047i-CTL		Homo Sapiens	SKIP004066	Normal
iPS Cell	CIRM-CW50046i-CTL		Homo Sapiens	SKIP004065	Normal
iPS Cell	CIRM-CW50045i-Ctl		Homo Sapiens	SKIP004064	Normal
iPS Cell	CIRM-CW50044i-Ctl		Homo Sapiens	SKIP004063	Normal
iPS Cell	CIRM-CW50043i-Affected		Homo Sapiens	SKIP004062	Diseased	ALZHEIMER DISEASE; AD
iPS Cell	CIRM-CW50042i-Ctl		Homo Sapiens	SKIP004061	Normal
iPS Cell	CIRM-CW50038i-CTL		Homo Sapiens	SKIP004060	Normal
iPS Cell	CIRM-CW50037i-CTL		Homo Sapiens	SKIP004059	Normal
iPS Cell	CIRM-CW50036i-CTL		Homo Sapiens	SKIP004058	Normal
iPS Cell	CIRM-CW50035i-CTL		Homo Sapiens	SKIP004057	Normal
iPS Cell	CIRM-CW50034i-CTL		Homo Sapiens	SKIP004056	Normal
iPS Cell	CIRM-CW50033i-Ctl		Homo Sapiens	SKIP004055	Normal
iPS Cell	CIRM-CW50029i-Ctl		Homo Sapiens	SKIP004054	Normal
iPS Cell	CIRM-CW50028i-Ctl		Homo Sapiens	SKIP004053	Normal
iPS Cell	CIRM-CW50027i-Ctl		Homo Sapiens	SKIP004052	Normal
iPS Cell	CIRM-CW50026i-Ctl		Homo Sapiens	SKIP004051	Normal
iPS Cell	CIRM-CW50024i-Affected		Homo Sapiens	SKIP004050	Diseased	ALZHEIMER DISEASE; AD (59)
iPS Cell	CIRM-CW50022i-CTL		Homo Sapiens	SKIP004049	Normal
iPS Cell	CIRM-CW50019i-CTL		Homo Sapiens	SKIP004048	Normal
iPS Cell	CIRM-CW50018i-Affected		Homo Sapiens	SKIP004047	Diseased	ALZHEIMER DISEASE; AD (53)
iPS Cell	CIRM-CW50016i-CTL		Homo Sapiens	SKIP004046	Normal
iPS Cell	CIRM-CW50015i-Ctl		Homo Sapiens	SKIP004045	Normal
iPS Cell	CIRM-CW50013i-Ctl		Homo Sapiens	SKIP004044	Normal
iPS Cell	CIRM-CW50008i-Ctl		Homo Sapiens	SKIP004043	Normal
iPS Cell	CIRM-CW50007i-Ctl		Homo Sapiens	SKIP004042	Normal
iPS Cell	CIRM-CW50006i-Ctl		Homo Sapiens	SKIP004041	Normal
iPS Cell	CIRM-CW50005i-Ctl		Homo Sapiens	SKIP004040	Normal
iPS Cell	CIRM-CW50004i-Affected		Homo Sapiens	SKIP004039	Diseased	ALZHEIMER DISEASE; AD (66)
iPS Cell	CIRM-CW50003i-Ctl		Homo Sapiens	SKIP004038	Normal
iPS Cell	CIRM-CW50002i-Ctl		Homo Sapiens	SKIP004037	Normal
iPS Cell	CIRM-CW50001i-Ctl		Homo Sapiens	SKIP004036	Normal
iPS Cell	CIRM-CW40231i-Affected		Homo Sapiens	SKIP004035	Diseased	IDIOPATHIC PULMONARY FIBROSIS; IPF (70)
iPS Cell	CIRM-CW40222i-Affected		Homo Sapiens	SKIP004034	Diseased	IDIOPATHIC PULMONARY FIBROSIS; IPF (61)
iPS Cell	CIRM-CW40221i-Affected		Homo Sapiens	SKIP004033	Diseased	IDIOPATHIC PULMONARY FIBROSIS; IPF (71)
iPS Cell	CIRM-CW40220i-Affected		Homo Sapiens	SKIP004032	Diseased	IDIOPATHIC PULMONARY FIBROSIS; IPF (71)
iPS Cell	CIRM-CW40219i-Affected		Homo Sapiens	SKIP004031	Diseased	IDIOPATHIC PULMONARY FIBROSIS; IPF (70)
iPS Cell	CIRM-CW40210i-Affected		Homo Sapiens	SKIP004030	Diseased	IDIOPATHIC PULMONARY FIBROSIS; IPF (83)
iPS Cell	CIRM-CW40208i-Affected		Homo Sapiens	SKIP004029	Diseased	IDIOPATHIC PULMONARY FIBROSIS; IPF (64)
iPS Cell	CIRM-CW40207i-Affected		Homo Sapiens	SKIP004028	Diseased	IDIOPATHIC PULMONARY FIBROSIS; IPF (64)
iPS Cell	CIRM-CW40201i-Affected		Homo Sapiens	SKIP004027	Diseased	IDIOPATHIC PULMONARY FIBROSIS; IPF (75)
iPS Cell	CIRM-CW40200i-Affected		Homo Sapiens	SKIP004026	Diseased	IDIOPATHIC PULMONARY FIBROSIS; IPF (66)
iPS Cell	CIRM-CW40198i-Affected		Homo Sapiens	SKIP004025	Diseased	IDIOPATHIC PULMONARY FIBROSIS; IPF (72)
iPS Cell	CIRM-CW40197i-Affected		Homo Sapiens	SKIP004024	Diseased	IDIOPATHIC PULMONARY FIBROSIS; IPF (65)
iPS Cell	CIRM-CW40195i-Affected		Homo Sapiens	SKIP004023	Diseased	IDIOPATHIC PULMONARY FIBROSIS; IPF (70)
iPS Cell	CIRM-CW40194i-Affected		Homo Sapiens	SKIP004022	Diseased	IDIOPATHIC PULMONARY FIBROSIS; IPF (65)
iPS Cell	CIRM-CW40190i-Affected		Homo Sapiens	SKIP004021	Diseased	IDIOPATHIC PULMONARY FIBROSIS; IPF (75)
iPS Cell	CIRM-CW40186i-Affected		Homo Sapiens	SKIP004020	Diseased	IDIOPATHIC PULMONARY FIBROSIS; IPF (59)
iPS Cell	CIRM-CW40183i-Affected		Homo Sapiens	SKIP004019	Diseased	IDIOPATHIC PULMONARY FIBROSIS; IPF (72)
iPS Cell	CIRM-CW40182i-Affected		Homo Sapiens	SKIP004018	Diseased	IDIOPATHIC PULMONARY FIBROSIS; IPF (79)
iPS Cell	CIRM-CW40178i-Affected		Homo Sapiens	SKIP004017	Diseased	IDIOPATHIC PULMONARY FIBROSIS; IPF (61)
iPS Cell	CIRM-CW40176i-Affected		Homo Sapiens	SKIP004016	Diseased	IDIOPATHIC PULMONARY FIBROSIS; IPF (56)
iPS Cell	CIRM-CW40175i-Affected		Homo Sapiens	SKIP004015	Diseased	IDIOPATHIC PULMONARY FIBROSIS; IPF (78)
iPS Cell	CIRM-CW40174i-Affected		Homo Sapiens	SKIP004014	Diseased	IDIOPATHIC PULMONARY FIBROSIS; IPF (74)
iPS Cell	CIRM-CW40169i-Affected		Homo Sapiens	SKIP004013	Diseased	IDIOPATHIC PULMONARY FIBROSIS; IPF (68)
iPS Cell	CIRM-CW40165i-Affected		Homo Sapiens	SKIP004012	Diseased	IDIOPATHIC PULMONARY FIBROSIS; IPF (62)
iPS Cell	CIRM-CW40164i-Affected		Homo Sapiens	SKIP004011	Diseased	IDIOPATHIC PULMONARY FIBROSIS; IPF (62)
iPS Cell	CIRM-CW40161i-Affected		Homo Sapiens	SKIP004010	Diseased	IDIOPATHIC PULMONARY FIBROSIS; IPF (74)
iPS Cell	CIRM-CW40160i-Affected		Homo Sapiens	SKIP004009	Diseased	IDIOPATHIC PULMONARY FIBROSIS; IPF (67)
iPS Cell	CIRM-CW40159i-Affected		Homo Sapiens	SKIP004008	Diseased	IDIOPATHIC PULMONARY FIBROSIS; IPF (69)
iPS Cell	CIRM-CW40158i-Affected		Homo Sapiens	SKIP004007	Diseased	IDIOPATHIC PULMONARY FIBROSIS; IPF (83)
iPS Cell	CIRM-CW40157i-Affected		Homo Sapiens	SKIP004006	Diseased	IDIOPATHIC PULMONARY FIBROSIS; IPF (50)
iPS Cell	CIRM-CW40155i-Affected		Homo Sapiens	SKIP004005	Diseased	IDIOPATHIC PULMONARY FIBROSIS; IPF (62)
iPS Cell	CIRM-CW40149i-Affected		Homo Sapiens	SKIP004004	Diseased	IDIOPATHIC PULMONARY FIBROSIS; IPF (85)
iPS Cell	CIRM-CW40148i-Affected		Homo Sapiens	SKIP004003	Diseased	IDIOPATHIC PULMONARY FIBROSIS; IPF (58)
iPS Cell	CIRM-CW40147i-Affected		Homo Sapiens	SKIP004002	Diseased	IDIOPATHIC PULMONARY FIBROSIS; IPF (69)
iPS Cell	CIRM-CW40145i-Affected		Homo Sapiens	SKIP004001	Diseased	IDIOPATHIC PULMONARY FIBROSIS; IPF (65)
iPS Cell	CIRM-CW40142i-Affected		Homo Sapiens	SKIP004000	Diseased	IDIOPATHIC PULMONARY FIBROSIS; IPF (54)
iPS Cell	CIRM-CW40139i-Affected		Homo Sapiens	SKIP003999	Diseased	IDIOPATHIC PULMONARY FIBROSIS; IPF (64)
iPS Cell	CIRM-CW40137i-Affected		Homo Sapiens	SKIP003998	Diseased	IDIOPATHIC PULMONARY FIBROSIS; IPF (72)
iPS Cell	CIRM-CW40136i-Affected		Homo Sapiens	SKIP003997	Diseased	IDIOPATHIC PULMONARY FIBROSIS; IPF (59)
iPS Cell	CIRM-CW40135i-Affected		Homo Sapiens	SKIP003996	Diseased	IDIOPATHIC PULMONARY FIBROSIS; IPF (68)
iPS Cell	CIRM-CW40132i-Affected		Homo Sapiens	SKIP003995	Diseased	IDIOPATHIC PULMONARY FIBROSIS; IPF (82)
iPS Cell	CIRM-CW40131i-Affected		Homo Sapiens	SKIP003994	Diseased	IDIOPATHIC PULMONARY FIBROSIS; IPF (74)
iPS Cell	CIRM-CW40130i-Affected		Homo Sapiens	SKIP003993	Diseased	IDIOPATHIC PULMONARY FIBROSIS; IPF
iPS Cell	CIRM-CW40129i-Affected		Homo Sapiens	SKIP003992	Diseased	IDIOPATHIC PULMONARY FIBROSIS; IPF (68)
iPS Cell	CIRM-CW40128i-Affected		Homo Sapiens	SKIP003991	Diseased	IDIOPATHIC PULMONARY FIBROSIS; IPF
iPS Cell	CIRM-CW40126i-Affected		Homo Sapiens	SKIP003990	Diseased	IDIOPATHIC PULMONARY FIBROSIS; IPF (63)
iPS Cell	CIRM-CW40124i-Affected		Homo Sapiens	SKIP003989	Diseased	IDIOPATHIC PULMONARY FIBROSIS; IPF (66)
iPS Cell	CIRM-CW40123i-Affected		Homo Sapiens	SKIP003988	Diseased	IDIOPATHIC PULMONARY FIBROSIS; IPF (79)
iPS Cell	CIRM-CW40120i-Affected		Homo Sapiens	SKIP003987	Diseased	IDIOPATHIC PULMONARY FIBROSIS; IPF (66)
iPS Cell	CIRM-CW40119i-Affected		Homo Sapiens	SKIP003986	Diseased	IDIOPATHIC PULMONARY FIBROSIS; IPF (71)
iPS Cell	CIRM-CW40118i-Affected		Homo Sapiens	SKIP003985	Diseased	IDIOPATHIC PULMONARY FIBROSIS; IPF (64)
iPS Cell	CIRM-CW40116i-Affected		Homo Sapiens	SKIP003984	Diseased	IDIOPATHIC PULMONARY FIBROSIS; IPF (52)
iPS Cell	CIRM-CW40115i-Affected		Homo Sapiens	SKIP003983	Diseased	IDIOPATHIC PULMONARY FIBROSIS; IPF (66)
iPS Cell	CIRM-CW40114i-Affected		Homo Sapiens	SKIP003982	Diseased	IDIOPATHIC PULMONARY FIBROSIS; IPF (59)
iPS Cell	CIRM-CW40113i-Affected		Homo Sapiens	SKIP003981	Diseased	IDIOPATHIC PULMONARY FIBROSIS; IPF (58)
iPS Cell	CIRM-CW40112i-Affected		Homo Sapiens	SKIP003980	Diseased	IDIOPATHIC PULMONARY FIBROSIS; IPF (55)
iPS Cell	CIRM-CW40111i-Affected		Homo Sapiens	SKIP003979	Diseased	IDIOPATHIC PULMONARY FIBROSIS; IPF (59)
iPS Cell	CIRM-CW40109i-Affected		Homo Sapiens	SKIP003978	Diseased	IDIOPATHIC PULMONARY FIBROSIS; IPF (65)
iPS Cell	CIRM-CW40107i-Affected		Homo Sapiens	SKIP003977	Diseased	IDIOPATHIC PULMONARY FIBROSIS; IPF (67)
iPS Cell	CIRM-CW40106i-Affected		Homo Sapiens	SKIP003976	Diseased	IDIOPATHIC PULMONARY FIBROSIS; IPF (65)
iPS Cell	CIRM-CW40105i-Affected		Homo Sapiens	SKIP003975	Diseased	IDIOPATHIC PULMONARY FIBROSIS; IPF (67)
iPS Cell	CIRM-CW40102i-Affected		Homo Sapiens	SKIP003974	Diseased	IDIOPATHIC PULMONARY FIBROSIS; IPF (69)
iPS Cell	CIRM-CW40097i-Affected		Homo Sapiens	SKIP003973	Diseased	IDIOPATHIC PULMONARY FIBROSIS; IPF (47)
iPS Cell	CIRM-CW40091i-Affected		Homo Sapiens	SKIP003972	Diseased	IDIOPATHIC PULMONARY FIBROSIS; IPF (77)
iPS Cell	CIRM-CW40090i-Affected		Homo Sapiens	SKIP003971	Diseased	IDIOPATHIC PULMONARY FIBROSIS; IPF (53)
iPS Cell	CIRM-CW40089i-Affected		Homo Sapiens	SKIP003970	Diseased	IDIOPATHIC PULMONARY FIBROSIS; IPF (69)
iPS Cell	CIRM-CW40087i-Affected		Homo Sapiens	SKIP003969	Diseased	IDIOPATHIC PULMONARY FIBROSIS; IPF (61)
iPS Cell	CIRM-CW40085i-Affected		Homo Sapiens	SKIP003968	Diseased	IDIOPATHIC PULMONARY FIBROSIS; IPF (66)
iPS Cell	CIRM-CW40084i-Affected		Homo Sapiens	SKIP003967	Diseased	IDIOPATHIC PULMONARY FIBROSIS; IPF (64)
iPS Cell	CIRM-CW40083i-Affected		Homo Sapiens	SKIP003966	Diseased	IDIOPATHIC PULMONARY FIBROSIS; IPF (50)
iPS Cell	CIRM-CW40080i-Affected		Homo Sapiens	SKIP003965	Diseased	IDIOPATHIC PULMONARY FIBROSIS; IPF (68)
iPS Cell	CIRM-CW40078i-Affected		Homo Sapiens	SKIP003964	Diseased	IDIOPATHIC PULMONARY FIBROSIS; IPF (60)
iPS Cell	CIRM-CW40075i-Affected		Homo Sapiens	SKIP003963	Diseased	IDIOPATHIC PULMONARY FIBROSIS; IPF (40)
iPS Cell	CIRM-CW40074i-Affected		Homo Sapiens	SKIP003962	Diseased	IDIOPATHIC PULMONARY FIBROSIS; IPF (58)
iPS Cell	CIRM-CW40071i-Affected		Homo Sapiens	SKIP003961	Diseased	IDIOPATHIC PULMONARY FIBROSIS; IPF (60)
iPS Cell	CIRM-CW40068i-Affected		Homo Sapiens	SKIP003960	Diseased	IDIOPATHIC PULMONARY FIBROSIS; IPF (58)
iPS Cell	CIRM-CW40067i-Affected		Homo Sapiens	SKIP003959	Diseased	IDIOPATHIC PULMONARY FIBROSIS; IPF (65)
iPS Cell	CIRM-CW40065i-Affected		Homo Sapiens	SKIP003958	Diseased	IDIOPATHIC PULMONARY FIBROSIS; IPF (70)
iPS Cell	CIRM-CW40064i-Affected		Homo Sapiens	SKIP003957	Diseased	IDIOPATHIC PULMONARY FIBROSIS; IPF (68)
iPS Cell	CIRM-CW40055i-Affected		Homo Sapiens	SKIP003956	Diseased	IDIOPATHIC PULMONARY FIBROSIS; IPF (63)
iPS Cell	CIRM-CW40051i-Affected		Homo Sapiens	SKIP003955	Diseased	IDIOPATHIC PULMONARY FIBROSIS; IPF (64)
iPS Cell	CIRM-CW40049i-Affected		Homo Sapiens	SKIP003954	Diseased	IDIOPATHIC PULMONARY FIBROSIS; IPF (57)
iPS Cell	CIRM-CW40045i-Affected		Homo Sapiens	SKIP003953	Diseased	IDIOPATHIC PULMONARY FIBROSIS; IPF (63)
iPS Cell	CIRM-CW40043i-Affected		Homo Sapiens	SKIP003952	Diseased	IDIOPATHIC PULMONARY FIBROSIS; IPF (42)
iPS Cell	CIRM-CW40040i-Affected		Homo Sapiens	SKIP003951	Diseased	IDIOPATHIC PULMONARY FIBROSIS; IPF (67)
iPS Cell	CIRM-CW40039i-Affected		Homo Sapiens	SKIP003950	Diseased	IDIOPATHIC PULMONARY FIBROSIS; IPF (69)
iPS Cell	CIRM-CW40037i-Affected		Homo Sapiens	SKIP003949	Diseased	IDIOPATHIC PULMONARY FIBROSIS; IPF (60)
iPS Cell	CIRM-CW40036i-Affected		Homo Sapiens	SKIP003948	Diseased	IDIOPATHIC PULMONARY FIBROSIS; IPF (59)
iPS Cell	CIRM-CW40035i-Affected		Homo Sapiens	SKIP003947	Diseased	IDIOPATHIC PULMONARY FIBROSIS; IPF (70)
iPS Cell	CIRM-CW40034i-Affected		Homo Sapiens	SKIP003946	Diseased	IDIOPATHIC PULMONARY FIBROSIS; IPF (55)
iPS Cell	CIRM-CW40031i-Affected		Homo Sapiens	SKIP003945	Diseased	IDIOPATHIC PULMONARY FIBROSIS; IPF (62)
iPS Cell	CIRM-CW40029i-Affected		Homo Sapiens	SKIP003944	Diseased	IDIOPATHIC PULMONARY FIBROSIS; IPF (70)
iPS Cell	CIRM-CW40028i-Affected		Homo Sapiens	SKIP003943	Diseased	IDIOPATHIC PULMONARY FIBROSIS; IPF (59)
iPS Cell	CIRM-CW40227i-Affected		Homo Sapiens	SKIP003942	Diseased	IDIOPATHIC PULMONARY FIBROSIS; IPF (67)
iPS Cell	CIRM-CW40027i-Affected		Homo Sapiens	SKIP003941	Diseased	IDIOPATHIC PULMONARY FIBROSIS; IPF (67)
iPS Cell	CIRM-CW40026i-Affected		Homo Sapiens	SKIP003940	Diseased	IDIOPATHIC PULMONARY FIBROSIS; IPF (65)
iPS Cell	CIRM-CW40025i-Affected		Homo Sapiens	SKIP003939	Diseased	IDIOPATHIC PULMONARY FIBROSIS; IPF (66)
iPS Cell	CIRM-CW40024i-Affected		Homo Sapiens	SKIP003938	Diseased	IDIOPATHIC PULMONARY FIBROSIS; IPF (61)
iPS Cell	CIRM-CW40023i-Affected		Homo Sapiens	SKIP003937	Diseased	IDIOPATHIC PULMONARY FIBROSIS; IPF (69)
iPS Cell	CIRM-CW40022i-Affected		Homo Sapiens	SKIP003936	Diseased	IDIOPATHIC PULMONARY FIBROSIS; IPF (56)
iPS Cell	CIRM-CW40015i-Affected		Homo Sapiens	SKIP003935	Diseased	IDIOPATHIC PULMONARY FIBROSIS; IPF (57)
iPS Cell	CIRM-CW40014i-Affected		Homo Sapiens	SKIP003934	Diseased	IDIOPATHIC PULMONARY FIBROSIS; IPF (63)
iPS Cell	CIRM-CW40013i-Affected		Homo Sapiens	SKIP003933	Diseased	IDIOPATHIC PULMONARY FIBROSIS; IPF (66)
iPS Cell	CIRM-CW40011i-Affected		Homo Sapiens	SKIP003932	Diseased	IDIOPATHIC PULMONARY FIBROSIS; IPF (67)
iPS Cell	CIRM-CW40009i-Affected		Homo Sapiens	SKIP003931	Diseased	IDIOPATHIC PULMONARY FIBROSIS; IPF (60)
iPS Cell	CIRM-CW40008i-Affected		Homo Sapiens	SKIP003930	Diseased	IDIOPATHIC PULMONARY FIBROSIS; IPF (56)
iPS Cell	CIRM-CW40007i-Affected		Homo Sapiens	SKIP003929	Diseased	IDIOPATHIC PULMONARY FIBROSIS; IPF (63)
iPS Cell	CIRM-CW40006i-Affected		Homo Sapiens	SKIP003928	Diseased	IDIOPATHIC PULMONARY FIBROSIS; IPF (54)
iPS Cell	CIRM-CW40004i-Affected		Homo Sapiens	SKIP003927	Diseased	IDIOPATHIC PULMONARY FIBROSIS; IPF (63)
iPS Cell	CIRM-CW40003i-Affected		Homo Sapiens	SKIP003926	Diseased	IDIOPATHIC PULMONARY FIBROSIS; IPF (67)
iPS Cell	CIRM-CW40002i-Affected		Homo Sapiens	SKIP003925	Diseased	IDIOPATHIC PULMONARY FIBROSIS; IPF (71)
iPS Cell	CIRM-CW40001i-Affected		Homo Sapiens	SKIP003924	Diseased	IDIOPATHIC PULMONARY FIBROSIS; IPF (65)
iPS Cell	CIRM-CW30422i-Affected		Homo Sapiens	SKIP003923	Diseased	DILATED CARDIOMYOPATHY (42)
iPS Cell	CIRM-CW30415i-Affected		Homo Sapiens	SKIP003922	Diseased	DILATED CARDIOMYOPATHY (41)
iPS Cell	CIRM-CW30414i-Affected		Homo Sapiens	SKIP003921	Diseased	DILATED CARDIOMYOPATHY (43)
iPS Cell	CIRM-CW30413i-Affected		Homo Sapiens	SKIP003920	Diseased	DILATED CARDIOMYOPATHY (21)
iPS Cell	CIRM-CW30412i-Affected		Homo Sapiens	SKIP003919	Diseased	HYPERTROPHIC CARDIOMYOPATHY (64)
iPS Cell	CIRM-CW30410i-Affected		Homo Sapiens	SKIP003918	Diseased	DILATED CARDIOMYOPATHY (23)
iPS Cell	CIRM-CW30409i-Affected		Homo Sapiens	SKIP003917	Diseased	HYPERTROPHIC CARDIOMYOPATHY (36)
iPS Cell	CIRM-CW30408i-Affected		Homo Sapiens	SKIP003916	Diseased	DILATED CARDIOMYOPATHY (19)
iPS Cell	CIRM-CW30401i-Affected		Homo Sapiens	SKIP003915	Diseased	DILATED CARDIOMYOPATHY (37)
iPS Cell	CIRM-CW30393i-Affected		Homo Sapiens	SKIP003914	Diseased	HYPERTROPHIC CARDIOMYOPATHY (31)
iPS Cell	CIRM-CW30392i-Affected		Homo Sapiens	SKIP003913	Diseased	DILATED CARDIOMYOPATHY (35)
iPS Cell	CIRM-CW30383i-Affected		Homo Sapiens	SKIP003912	Diseased	DILATED CARDIOMYOPATHY
iPS Cell	CIRM-CW30371i-Affected		Homo Sapiens	SKIP003911	Diseased	DILATED CARDIOMYOPATHY (41)
iPS Cell	CIRM-CW30370i-Affected		Homo Sapiens	SKIP003910	Diseased	DILATED CARDIOMYOPATHY (38)
iPS Cell	CIRM-CW30369i-Affected		Homo Sapiens	SKIP003909	Diseased	DILATED CARDIOMYOPATHY (19)
iPS Cell	CIRM-CW30340i-Affected		Homo Sapiens	SKIP003908	Diseased	HYPERTROPHIC CARDIOMYOPATHY (66)
iPS Cell	CIRM-CW30338i-Affected		Homo Sapiens	SKIP003907	Diseased	DILATED CARDIOMYOPATHY (53)
iPS Cell	CIRM-CW30336i-Affected		Homo Sapiens	SKIP003906	Diseased	DILATED CARDIOMYOPATHY (52)
iPS Cell	CIRM-CW30335i-Affected		Homo Sapiens	SKIP003905	Diseased	DILATED CARDIOMYOPATHY (32)
iPS Cell	CIRM-CW30331i-Affected		Homo Sapiens	SKIP003904	Diseased	HYPERTROPHIC CARDIOMYOPATHY (40)
iPS Cell	CIRM-CW30329i-Affected		Homo Sapiens	SKIP003903	Diseased	HYPERTROPHIC CARDIOMYOPATHY (57)
iPS Cell	CIRM-CW30328i-Affected		Homo Sapiens	SKIP003902	Diseased	DILATED CARDIOMYOPATHY (61)
iPS Cell	CIRM-CW30327i-Affected		Homo Sapiens	SKIP003901	Diseased	DILATED CARDIOMYOPATHY (50)
iPS Cell	CIRM-CW30322i-Affected		Homo Sapiens	SKIP003900	Diseased	DILATED CARDIOMYOPATHY (31)
iPS Cell	CIRM-CW30319i-Affected		Homo Sapiens	SKIP003899	Diseased	DILATED CARDIOMYOPATHY (47)
iPS Cell	CIRM-CW30314i-Affected		Homo Sapiens	SKIP003898	Diseased	HYPERTROPHIC CARDIOMYOPATHY (35)
iPS Cell	CIRM-CW30312i-Affected		Homo Sapiens	SKIP003897	Diseased	HYPERTROPHIC CARDIOMYOPATHY (47)
iPS Cell	CIRM-CW30311i-Affected		Homo Sapiens	SKIP003896	Diseased	HYPERTROPHIC CARDIOMYOPATHY (61)
iPS Cell	CIRM-CW30310i-Affected		Homo Sapiens	SKIP003895	Diseased	HYPERTROPHIC CARDIOMYOPATHY (59)
iPS Cell	CIRM-CW30309i-Affected		Homo Sapiens	SKIP003894	Diseased	DILATED CARDIOMYOPATHY (11)
iPS Cell	CIRM-CW30307i-Affected		Homo Sapiens	SKIP003893	Diseased	DILATED CARDIOMYOPATHY (12)
iPS Cell	CIRM-CW30306i-Affected		Homo Sapiens	SKIP003892	Diseased	DILATED CARDIOMYOPATHY (61)
iPS Cell	CIRM-CW30303i-Affected		Homo Sapiens	SKIP003891	Diseased	DILATED CARDIOMYOPATHY (46)
iPS Cell	CIRM-CW30302i-Affected		Homo Sapiens	SKIP003890	Diseased	DILATED CARDIOMYOPATHY (66)
iPS Cell	CIRM-CW30299i-Affected		Homo Sapiens	SKIP003889	Diseased	DILATED CARDIOMYOPATHY (48)
iPS Cell	CIRM-CW30297i-Affected		Homo Sapiens	SKIP003888	Diseased	CARDIOMYOPATHY - OTHER (62)
iPS Cell	CIRM-CW30295i-Affected		Homo Sapiens	SKIP003887	Diseased	HYPERTROPHIC CARDIOMYOPATHY (43)
iPS Cell	CIRM-CW30292i-Affected		Homo Sapiens	SKIP003886	Diseased	HYPERTROPHIC CARDIOMYOPATHY (9)
iPS Cell	CIRM-CW30291i-Ctl		Homo Sapiens	SKIP003885	Normal
iPS Cell	CIRM-CW30290i-Affected		Homo Sapiens	SKIP003884	Diseased	DILATED CARDIOMYOPATHY (34)
iPS Cell	CIRM-CW30289i-Affected		Homo Sapiens	SKIP003883	Diseased	ARRHYTHMOGENIC RIGHT VENTRICULAR CARDIOMYOPATHY (56)
iPS Cell	CIRM-CW30288i-Affected		Homo Sapiens	SKIP003882	Diseased	HYPERTROPHIC CARDIOMYOPATHY (67)
iPS Cell	CIRM-CW30285i-Affected		Homo Sapiens	SKIP003881	Diseased	DILATED CARDIOMYOPATHY (40)
iPS Cell	CIRM-CW30283i-Affected		Homo Sapiens	SKIP003880	Diseased	DILATED CARDIOMYOPATHY (29)
iPS Cell	CIRM-CW30282i-Affected		Homo Sapiens	SKIP003879	Diseased	DILATED CARDIOMYOPATHY (24)
iPS Cell	CIRM-CW30280i-Affected		Homo Sapiens	SKIP003878	Diseased	DILATED CARDIOMYOPATHY (26)
iPS Cell	CIRM-CW30277i-Affected		Homo Sapiens	SKIP003877	Diseased	HYPERTROPHIC CARDIOMYOPATHY (70)
iPS Cell	CIRM-CW30276i-Affected		Homo Sapiens	SKIP003876	Diseased	DILATED CARDIOMYOPATHY (55)
iPS Cell	CIRM-CW30274i-Affected		Homo Sapiens	SKIP003875	Diseased	DILATED CARDIOMYOPATHY (62)
iPS Cell	CIRM-CW30269i-Affected		Homo Sapiens	SKIP003874	Diseased	DILATED CARDIOMYOPATHY (37)
iPS Cell	CIRM-CW30268i-Affected		Homo Sapiens	SKIP003873	Diseased	DILATED CARDIOMYOPATHY (40)
iPS Cell	CIRM-CW30265i-Affected		Homo Sapiens	SKIP003872	Diseased	DILATED CARDIOMYOPATHY (37)
iPS Cell	CIRM-CW30259i-Affected		Homo Sapiens	SKIP003871	Diseased	DILATED CARDIOMYOPATHY (49)
iPS Cell	CIRM-CW30258i-Affected		Homo Sapiens	SKIP003870	Diseased	DILATED CARDIOMYOPATHY (28)
iPS Cell	CIRM-CW30255i-Affected		Homo Sapiens	SKIP003869	Diseased	DILATED CARDIOMYOPATHY (37)
iPS Cell	CIRM-CW30253i-Affected		Homo Sapiens	SKIP003868	Diseased	DILATED CARDIOMYOPATHY (38)
iPS Cell	CIRM-CW30251i-Affected		Homo Sapiens	SKIP003867	Diseased	DILATED CARDIOMYOPATHY (52)
iPS Cell	CIRM-CW30249i-Affected		Homo Sapiens	SKIP003866	Diseased	DILATED CARDIOMYOPATHY (26)
iPS Cell	CIRM-CW30248i-Affected		Homo Sapiens	SKIP003865	Diseased	DILATED CARDIOMYOPATHY (82)
iPS Cell	CIRM-CW30247i-Affected		Homo Sapiens	SKIP003864	Diseased	DILATED CARDIOMYOPATHY (39)
iPS Cell	CIRM-CW30246i-Affected		Homo Sapiens	SKIP003863	Diseased	DILATED CARDIOMYOPATHY (18)
iPS Cell	CIRM-CW30245i-Affected		Homo Sapiens	SKIP003862	Diseased	HYPERTROPHIC CARDIOMYOPATHY (32)
iPS Cell	CIRM-CW30243i-Affected		Homo Sapiens	SKIP003861	Diseased	DILATED CARDIOMYOPATHY (36)
iPS Cell	CIRM-CW30242i-Affected		Homo Sapiens	SKIP003860	Diseased	DILATED CARDIOMYOPATHY (56)
iPS Cell	CIRM-CW30240i-Affected		Homo Sapiens	SKIP003859	Diseased	DILATED CARDIOMYOPATHY (60)
iPS Cell	CIRM-CW30238i-Affected		Homo Sapiens	SKIP003858	Diseased	DILATED CARDIOMYOPATHY (46)
iPS Cell	CIRM-CW30237i-Affected		Homo Sapiens	SKIP003857	Diseased	DILATED CARDIOMYOPATHY (55)
iPS Cell	CIRM-CW30236i-Affected		Homo Sapiens	SKIP003856	Diseased	DILATED CARDIOMYOPATHY (19)
iPS Cell	CIRM-CW30234i-Affected		Homo Sapiens	SKIP003855	Diseased	HYPERTROPHIC CARDIOMYOPATHY (64)
iPS Cell	CIRM-CW30232i-Affected		Homo Sapiens	SKIP003854	Diseased	DILATED CARDIOMYOPATHY (14)
iPS Cell	CIRM-CW30230i-Affected		Homo Sapiens	SKIP003853	Diseased	DILATED CARDIOMYOPATHY (48)
iPS Cell	CIRM-CW30229i-Affected		Homo Sapiens	SKIP003852	Diseased	DILATED CARDIOMYOPATHY (29)
iPS Cell	CIRM-CW30228i-Affected		Homo Sapiens	SKIP003851	Diseased	DILATED CARDIOMYOPATHY (33)
iPS Cell	CIRM-CW30225i-Affected		Homo Sapiens	SKIP003850	Diseased	LEFT VENTRICULAR NON-COMPACTION CARDIOMYOPATHY (34)
iPS Cell	CIRM-CW30222i-Affected		Homo Sapiens	SKIP003849	Diseased	DILATED CARDIOMYOPATHY (29)
iPS Cell	CIRM-CW30219i-Affected		Homo Sapiens	SKIP003848	Diseased	DILATED CARDIOMYOPATHY (15)
iPS Cell	CIRM-CW30217i-Affected		Homo Sapiens	SKIP003847	Diseased	LEFT VENTRICULAR NON-COMPACTION CARDIOMYOPATHY (34)
iPS Cell	CIRM-CW30215i-Affected		Homo Sapiens	SKIP003846	Diseased	DILATED CARDIOMYOPATHY (52)
iPS Cell	CIRM-CW30214i-Affected		Homo Sapiens	SKIP003845	Diseased	DILATED CARDIOMYOPATHY (29)
iPS Cell	CIRM-CW30212i-Affected		Homo Sapiens	SKIP003844	Diseased	DILATED CARDIOMYOPATHY (47)
iPS Cell	CIRM-CW30211i-Affected		Homo Sapiens	SKIP003843	Diseased	DILATED CARDIOMYOPATHY (70)
iPS Cell	CIRM-CW30207i-Affected		Homo Sapiens	SKIP003842	Diseased	DILATED CARDIOMYOPATHY (37)
iPS Cell	CIRM-CW30205i-Affected		Homo Sapiens	SKIP003841	Diseased	HYPERTROPHIC CARDIOMYOPATHY (51)
iPS Cell	CIRM-CW30203i-Affected		Homo Sapiens	SKIP003840	Diseased	DILATED CARDIOMYOPATHY (40)
iPS Cell	CIRM-CW30198i-Affected		Homo Sapiens	SKIP003839	Diseased	DILATED CARDIOMYOPATHY (17)
iPS Cell	CIRM-CW30197i-Affected		Homo Sapiens	SKIP003838	Diseased	DILATED CARDIOMYOPATHY (41)
iPS Cell	CIRM-CW30196i-Affected		Homo Sapiens	SKIP003837	Diseased	DILATED CARDIOMYOPATHY (35)
iPS Cell	CIRM-CW30192i-Affected		Homo Sapiens	SKIP003836	Diseased	HYPERTROPHIC CARDIOMYOPATHY (51)
iPS Cell	CIRM-CW30189i-Affected		Homo Sapiens	SKIP003835	Diseased	CARDIOMYOPATHY - OTHER (53)
iPS Cell	CIRM-CW30188i-Affected		Homo Sapiens	SKIP003834	Diseased	DILATED CARDIOMYOPATHY (45)
iPS Cell	CIRM-CW30187i-Affected		Homo Sapiens	SKIP003833	Diseased	DILATED CARDIOMYOPATHY (34)
iPS Cell	CIRM-CW30186i-Affected		Homo Sapiens	SKIP003832	Diseased	HYPERTROPHIC CARDIOMYOPATHY (58)
iPS Cell	CIRM-CW30185i-Affected		Homo Sapiens	SKIP003831	Diseased	DILATED CARDIOMYOPATHY (46)
iPS Cell	CIRM-CW30184i-Affected		Homo Sapiens	SKIP003830	Diseased	DILATED CARDIOMYOPATHY (62)
iPS Cell	CIRM-CW30181i-Affected		Homo Sapiens	SKIP003829	Diseased	CARDIOMYOPATHY - OTHER (65)
iPS Cell	CIRM-CW30180i-Affected		Homo Sapiens	SKIP003828	Diseased	DILATED CARDIOMYOPATHY
iPS Cell	CIRM-CW30178i-Affected		Homo Sapiens	SKIP003827	Diseased	DILATED CARDIOMYOPATHY (24)
iPS Cell	CIRM-CW30177i-Affected		Homo Sapiens	SKIP003826	Diseased	HYPERTROPHIC CARDIOMYOPATHY (78)
iPS Cell	CIRM-CW30175i-Affected		Homo Sapiens	SKIP003825	Diseased	CARDIOMYOPATHY - OTHER (69)
iPS Cell	CIRM-CW30173i-Affected		Homo Sapiens	SKIP003824	Diseased	DILATED CARDIOMYOPATHY (39)
iPS Cell	CIRM-CW30171i-Ctl		Homo Sapiens	SKIP003823	Normal
iPS Cell	CIRM-CW30170i-Affected		Homo Sapiens	SKIP003822	Diseased	DILATED CARDIOMYOPATHY (19)
iPS Cell	CIRM-CW30169i-Affected		Homo Sapiens	SKIP003821	Diseased	DILATED CARDIOMYOPATHY (52)
iPS Cell	CIRM-CW30168i-Affected		Homo Sapiens	SKIP003820	Diseased	HYPERTROPHIC CARDIOMYOPATHY (58)
iPS Cell	CIRM-CW30167i-Affected		Homo Sapiens	SKIP003819	Diseased	DILATED CARDIOMYOPATHY (20)
iPS Cell	CIRM-CW30166i-Affected		Homo Sapiens	SKIP003818	Diseased	CARDIOMYOPATHY - OTHER (47)
iPS Cell	CIRM-CW30165i-Affected		Homo Sapiens	SKIP003817	Diseased	DILATED CARDIOMYOPATHY (46)
iPS Cell	CIRM-CW30162i-Affected		Homo Sapiens	SKIP003816	Diseased	CARDIOMYOPATHY - OTHER (55)
iPS Cell	CIRM-CW30161i-Affected		Homo Sapiens	SKIP003815	Diseased	DILATED CARDIOMYOPATHY (55)
iPS Cell	CIRM-CW30160i-Affected		Homo Sapiens	SKIP003814	Diseased	DILATED CARDIOMYOPATHY (50)
iPS Cell	CIRM-CW30159i-Affected		Homo Sapiens	SKIP003813	Diseased	DILATED CARDIOMYOPATHY (29)
iPS Cell	CIRM-CW30155i-Affected		Homo Sapiens	SKIP003812	Diseased	HYPERTROPHIC CARDIOMYOPATHY (69)
iPS Cell	CIRM-CW30154i-Affected		Homo Sapiens	SKIP003811	Diseased	DILATED CARDIOMYOPATHY (63)
iPS Cell	CIRM-CW30152i-Affected		Homo Sapiens	SKIP003810	Diseased	DILATED CARDIOMYOPATHY (28)
iPS Cell	CIRM-CW30150i-Affected		Homo Sapiens	SKIP003809	Diseased	DILATED CARDIOMYOPATHY (55)
iPS Cell	CIRM-CW30149i-Affected		Homo Sapiens	SKIP003808	Diseased	LEFT VENTRICULAR NON-COMPACTION CARDIOMYOPATHY (49)
iPS Cell	CIRM-CW30148i-Affected		Homo Sapiens	SKIP003807	Diseased	CARDIOMYOPATHY - OTHER (52)
iPS Cell	CIRM-CW30147i-Affected		Homo Sapiens	SKIP003806	Diseased	HYPERTROPHIC CARDIOMYOPATHY (51)
iPS Cell	CIRM-CW30146i-Affected		Homo Sapiens	SKIP003805	Diseased	DILATED CARDIOMYOPATHY (66)
iPS Cell	CIRM-CW30145i-Ctl		Homo Sapiens	SKIP003804	Normal
iPS Cell	CIRM-CW30144i-Affected		Homo Sapiens	SKIP003803	Diseased	DILATED CARDIOMYOPATHY (36)
iPS Cell	CIRM-CW30142i-Affected		Homo Sapiens	SKIP003802	Diseased	DILATED CARDIOMYOPATHY (29)
iPS Cell	CIRM-CW30141i-Affected		Homo Sapiens	SKIP003801	Diseased	DILATED CARDIOMYOPATHY (51)
iPS Cell	CIRM-CW30140i-Affected		Homo Sapiens	SKIP003800	Diseased	CARDIOMYOPATHY - OTHER (63)
iPS Cell	CIRM-CW30139i-Affected		Homo Sapiens	SKIP003799	Diseased	HYPERTROPHIC CARDIOMYOPATHY (23)
iPS Cell	CIRM-CW30138i-Affected		Homo Sapiens	SKIP003798	Diseased	CARDIOMYOPATHY - OTHER (57)
iPS Cell	CIRM-CW30137i-Affected		Homo Sapiens	SKIP003797	Diseased	DILATED CARDIOMYOPATHY (60)
iPS Cell	CIRM-CW30136i-Affected		Homo Sapiens	SKIP003796	Diseased	DILATED CARDIOMYOPATHY (15)
iPS Cell	CIRM-CW30134i-Affected		Homo Sapiens	SKIP003795	Diseased	HYPERTROPHIC CARDIOMYOPATHY (61)
iPS Cell	CIRM-CW30133i-Affected		Homo Sapiens	SKIP003794	Diseased	HYPERTROPHIC CARDIOMYOPATHY (62)
iPS Cell	CIRM-CW30132i-Affected		Homo Sapiens	SKIP003793	Diseased	DILATED CARDIOMYOPATHY (50)
iPS Cell	CIRM-CW30130i-Affected		Homo Sapiens	SKIP003792	Diseased	DILATED CARDIOMYOPATHY (32)
iPS Cell	CIRM-CW30129i-Affected		Homo Sapiens	SKIP003791	Diseased	DILATED CARDIOMYOPATHY (11)
iPS Cell	CIRM-CW30128i-Affected		Homo Sapiens	SKIP003790	Diseased	DILATED CARDIOMYOPATHY (59)
iPS Cell	CIRM-CW30127i-Affected		Homo Sapiens	SKIP003789	Diseased	DILATED CARDIOMYOPATHY (36)
iPS Cell	CIRM-CW30126i-Affected		Homo Sapiens	SKIP003788	Diseased	CARDIOMYOPATHY - OTHER (61)
iPS Cell	CIRM-CW30125i-Affected		Homo Sapiens	SKIP003787	Diseased	DILATED CARDIOMYOPATHY (45)
iPS Cell	CIRM-CW30123i-Affected		Homo Sapiens	SKIP003786	Diseased	DILATED CARDIOMYOPATHY (34)
iPS Cell	CIRM-CW30122i-Affected		Homo Sapiens	SKIP003785	Diseased	DILATED CARDIOMYOPATHY (25)
iPS Cell	CIRM-CW30121i-Affected		Homo Sapiens	SKIP003784	Diseased	DILATED CARDIOMYOPATHY (45)
iPS Cell	CIRM-CW30120i-Affected		Homo Sapiens	SKIP003783	Diseased	DILATED CARDIOMYOPATHY (35)
iPS Cell	CIRM-CW30119i-Affected		Homo Sapiens	SKIP003782	Diseased	CARDIOMYOPATHY - OTHER (29)
iPS Cell	CIRM-CW30118i-Affected		Homo Sapiens	SKIP003781	Diseased	LEFT VENTRICULAR NON-COMPACTION CARDIOMYOPATHY (23)
iPS Cell	CIRM-CW30117i-Affected		Homo Sapiens	SKIP003780	Diseased	DILATED CARDIOMYOPATHY (52)
iPS Cell	CIRM-CW30116i-Affected		Homo Sapiens	SKIP003779	Diseased	CARDIOMYOPATHY - OTHER (48)
iPS Cell	CIRM-CW30113i-Affected		Homo Sapiens	SKIP003778	Diseased	DILATED CARDIOMYOPATHY (45)
iPS Cell	CIRM-CW30112i-Affected		Homo Sapiens	SKIP003777	Diseased	DILATED CARDIOMYOPATHY (29)
iPS Cell	CIRM-CW30111i-Affected		Homo Sapiens	SKIP003776	Diseased	DILATED CARDIOMYOPATHY (17)
iPS Cell	CIRM-CW30109i-Affected		Homo Sapiens	SKIP003775	Diseased	DILATED CARDIOMYOPATHY (50)
iPS Cell	CIRM-CW30108i-Affected		Homo Sapiens	SKIP003774	Diseased	CARDIOMYOPATHY - OTHER (50)
iPS Cell	CIRM-CW30106i-Affected		Homo Sapiens	SKIP003773	Diseased	HYPERTROPHIC CARDIOMYOPATHY (43)
iPS Cell	CIRM-CW30105i-Affected		Homo Sapiens	SKIP003772	Diseased	DILATED CARDIOMYOPATHY (43)
iPS Cell	CIRM-CW30104i-Affected		Homo Sapiens	SKIP003771	Diseased	DILATED CARDIOMYOPATHY (52)
iPS Cell	CIRM-CW30103i-Affected		Homo Sapiens	SKIP003770	Diseased	DILATED CARDIOMYOPATHY (39)
iPS Cell	CIRM-CW30102i-Affected		Homo Sapiens	SKIP003769	Diseased	CARDIOMYOPATHY - OTHER (58)
iPS Cell	CIRM-CW30101i-Affected		Homo Sapiens	SKIP003768	Diseased	DILATED CARDIOMYOPATHY (49)
iPS Cell	CIRM-CW30099i-Affected		Homo Sapiens	SKIP003767	Diseased	DILATED CARDIOMYOPATHY (44)
iPS Cell	CIRM-CW30098i-Affected		Homo Sapiens	SKIP003766	Diseased	DILATED CARDIOMYOPATHY (57)
iPS Cell	CIRM-CW30097i-Affected		Homo Sapiens	SKIP003765	Diseased	DILATED CARDIOMYOPATHY (46)
iPS Cell	CIRM-CW30096i-Affected		Homo Sapiens	SKIP003764	Diseased	DILATED CARDIOMYOPATHY (45)
iPS Cell	CIRM-CW30093i-Affected		Homo Sapiens	SKIP003763	Diseased	LEFT VENTRICULAR NON-COMPACTION CARDIOMYOPATHY (55)
iPS Cell	CIRM-CW30090i-Affected		Homo Sapiens	SKIP003762	Diseased	DILATED CARDIOMYOPATHY (60)
iPS Cell	CIRM-CW30086i-Affected		Homo Sapiens	SKIP003761	Diseased	HYPERTROPHIC CARDIOMYOPATHY (64)
iPS Cell	CIRM-CW30085i-Affected		Homo Sapiens	SKIP003760	Diseased	DILATED CARDIOMYOPATHY (43)
iPS Cell	CIRM-CW30083i-Affected		Homo Sapiens	SKIP003759	Diseased	DILATED CARDIOMYOPATHY (36)
iPS Cell	CIRM-CW30082i-Affected		Homo Sapiens	SKIP003758	Diseased	DILATED CARDIOMYOPATHY (30)
iPS Cell	CIRM-CW30079i-Affected		Homo Sapiens	SKIP003757	Diseased	HYPERTROPHIC CARDIOMYOPATHY (57)
iPS Cell	CIRM-CW30078i-Affected		Homo Sapiens	SKIP003756	Diseased	DILATED CARDIOMYOPATHY (57)
iPS Cell	CIRM-CW30076i-Affected		Homo Sapiens	SKIP003755	Diseased	CARDIOMYOPATHY - OTHER (69)
iPS Cell	CIRM-CW30075i-Affected		Homo Sapiens	SKIP003754	Diseased	DILATED CARDIOMYOPATHY (38)
iPS Cell	CIRM-CW30074i-Affected		Homo Sapiens	SKIP003753	Diseased	DILATED CARDIOMYOPATHY (35)
iPS Cell	CIRM-CW30073i-Affected		Homo Sapiens	SKIP003752	Diseased	HYPERTROPHIC CARDIOMYOPATHY (41)
iPS Cell	CIRM-CW30071i-Affected		Homo Sapiens	SKIP003751	Diseased	DILATED CARDIOMYOPATHY (65)
iPS Cell	CIRM-CW30070i-Affected		Homo Sapiens	SKIP003750	Diseased	DILATED CARDIOMYOPATHY (33)
iPS Cell	CIRM-CW30069i-Affected		Homo Sapiens	SKIP003749	Diseased	DILATED CARDIOMYOPATHY (38)
iPS Cell	CIRM-CW30067i-Affected		Homo Sapiens	SKIP003748	Diseased	HYPERTROPHIC CARDIOMYOPATHY (21)
iPS Cell	CIRM-CW30066i-Affected		Homo Sapiens	SKIP003747	Diseased	CARDIOMYOPATHY - OTHER (57)
iPS Cell	CIRM-CW30065i-Affected		Homo Sapiens	SKIP003746	Diseased	CARDIOMYOPATHY - OTHER (54)
iPS Cell	CIRM-CW30064i-Affected		Homo Sapiens	SKIP003745	Diseased	HYPERTROPHIC CARDIOMYOPATHY (76)
iPS Cell	CIRM-CW30063i-Affected		Homo Sapiens	SKIP003744	Diseased	DILATED CARDIOMYOPATHY (42)
iPS Cell	CIRM-CW30062i-Affected		Homo Sapiens	SKIP003743	Diseased	CARDIOMYOPATHY - OTHER (41)
iPS Cell	CIRM-CW30061i-Affected		Homo Sapiens	SKIP003742	Diseased	CARDIOMYOPATHY - OTHER (51)
iPS Cell	CIRM-CW30060i-Affected		Homo Sapiens	SKIP003741	Diseased	CARDIOMYOPATHY - OTHER (68)
iPS Cell	CIRM-CW30059i-Affected		Homo Sapiens	SKIP003740	Diseased	DILATED CARDIOMYOPATHY (54)
iPS Cell	CIRM-CW30058i-Affected		Homo Sapiens	SKIP003739	Diseased	CARDIOMYOPATHY - OTHER (55)
iPS Cell	CIRM-CW30052i-Affected		Homo Sapiens	SKIP003738	Diseased	CARDIOMYOPATHY - OTHER (40)
iPS Cell	CIRM-CW30046i-Affected		Homo Sapiens	SKIP003737	Diseased	DILATED CARDIOMYOPATHY (67)
iPS Cell	CIRM-CW30044i-Affected		Homo Sapiens	SKIP003736	Diseased	HYPERTROPHIC CARDIOMYOPATHY (6)
iPS Cell	CIRM-CW30043i-Affected		Homo Sapiens	SKIP003735	Diseased	DILATED CARDIOMYOPATHY (44)
iPS Cell	CIRM-CW30038i-Affected		Homo Sapiens	SKIP003734	Diseased	DILATED CARDIOMYOPATHY (50)
iPS Cell	CIRM-CW30033i-Affected		Homo Sapiens	SKIP003733	Diseased	CARDIOMYOPATHY - OTHER (70)
iPS Cell	CIRM-CW30029i-Affected		Homo Sapiens	SKIP003732	Diseased	DILATED CARDIOMYOPATHY (62)
iPS Cell	CIRM-CW30028i-Affected		Homo Sapiens	SKIP003731	Diseased	CARDIOMYOPATHY - OTHER (42)
iPS Cell	CIRM-CW30027i-Affected		Homo Sapiens	SKIP003730	Diseased	CARDIOMYOPATHY - OTHER (33)
iPS Cell	CIRM-CW30022i-Affected		Homo Sapiens	SKIP003729	Diseased	CARDIOMYOPATHY - OTHER (49)
iPS Cell	CIRM-CW30020i-Affected		Homo Sapiens	SKIP003728	Diseased	HYPERTROPHIC CARDIOMYOPATHY
iPS Cell	CIRM-CW30018i-Affected		Homo Sapiens	SKIP003727	Diseased	HYPERTROPHIC CARDIOMYOPATHY (52)
iPS Cell	CIRM-CW30017i-Affected		Homo Sapiens	SKIP003726	Diseased	HYPERTROPHIC CARDIOMYOPATHY (65)
iPS Cell	CIRM-CW30016i-Affected		Homo Sapiens	SKIP003725	Diseased	CARDIOMYOPATHY - OTHER (27)
iPS Cell	CIRM-CW30014i-Affected		Homo Sapiens	SKIP003724	Diseased	DILATED CARDIOMYOPATHY (53)
iPS Cell	CIRM-CW30013i-Affected		Homo Sapiens	SKIP003723	Diseased	CARDIOMYOPATHY - OTHER (21)
iPS Cell	CIRM-CW30011i-Affected		Homo Sapiens	SKIP003722	Diseased	HYPERTROPHIC CARDIOMYOPATHY (53)
iPS Cell	CIRM-CW30010i-Affected		Homo Sapiens	SKIP003721	Diseased	DILATED CARDIOMYOPATHY (27)
iPS Cell	CIRM-CW30009i-Affected		Homo Sapiens	SKIP003720	Diseased	CARDIOMYOPATHY - OTHER (39)
[truncated: 185 more rows]

[truncated: 7 more sheets: hPSCreg, CellNet, StemCellNet, HSC-explorer, CORTECON, ESCD, List of databases_Parameters]
